# Supplementary material for: Hybrids of Sterically Hindered Phenols and Diaryl Ureas: Synthesis, Switch from Antioxidant Activity to ROS Generation and Induction of Apoptosis
Source: MDPI journal article supplement (doi:10.3390/ijms241612637), 2023-08-10
Supplement: s1 [file s1]

## Supporting Information

# Hybrids of sterically hindered phenols and diaryl ureas: syn-thesis, switch from antioxidant activity to ROS-generation and induction of apoptosis

Elmira Gibadullina<sup>1,\*</sup>, Margarita Neganova<sup>1,2</sup>, Yulia Aleksandrova<sup>1,2</sup>, Nguyen Hoang Bao Tran<sup>3</sup>, Alexandra Voloshina<sup>1</sup>, Mikhail Khrizanforov<sup>1</sup>, Nguyen Thi Thu<sup>3</sup>, Ekaterina Vinyukova<sup>2</sup>, Konstantin Volcho<sup>4</sup>, Dmitry Tsypyshev<sup>4</sup>, Anna Lyubina<sup>1</sup>, Syumbelya Gumerova<sup>1</sup>, Anna Strel'nik<sup>1</sup>, Julia Voronina<sup>5</sup>, Daut Islamov<sup>6</sup>, Rakhmetulla Zhapparbergenov<sup>7,\*</sup>, Nurbol Appazov<sup>7</sup>, Beauty Chabuka<sup>8</sup>, Kimberley Christopher<sup>8</sup>, Alexander Burilov<sup>1</sup>, Oleg Sinyashin<sup>1</sup> and Igor Alabugin<sup>1,8</sup>

<sup>1</sup>

<sup>1</sup> Arbuzov Institute of Organic and Physical Chemistry, FRC Kazan Scientific Center, Russian Academy of Sciences, Akad. Arbuzov st. 8, Kazan, 420088, Russia;

<sup>2</sup> Institute of Physiologically Active Compounds at Federal Research Center of Problems of Chemical Physics and Medicinal Chemistry, Russian Academy of Sciences, Severnij pr. 1, Chernogolovka, 142432, Russia;

<sup>3</sup> The Kazan National Research Technological University, Karl Marx st., 68, Kazan, 420015, Russia;

<sup>4</sup> Department of Medicinal Chemistry, Novosibirsk Institute of Organic Chemistry, Lavrentiev av. 9, Novosibirsk, 630090, Russia;

<sup>5</sup> N. S. Kurnakov Institute of General and Inorganic Chemistry RAS, Leninskii prospekt, 31, Moscow, 119071, Russia;

<sup>6</sup> Laboratory for structural analysis of biomacromolecules, Kazan Scientific Center of Russian Academy of Science, 31, Kremlevskaya, Kazan, 420008, Russia

<sup>7</sup> Korkyt Ata Kyzylorda University, 120014, 29A, Aiteke Bi street, Kyzylorda, Republic of Kazakhstan;

<sup>8</sup> Florida State University, Department of Chemistry and Biochemistry, 95 Chieftan Way, Tallahassee, FL 32306-3290, USA.

\* Correspondence: [elmirak@iopc.ru](mailto:elmirak@iopc.ru), [elmirak\\_1978@mail.ru](mailto:elmirak_1978@mail.ru) (EG); Tel.: +7-843-272-7324; [neganova83@mail.ru](mailto:neganova83@mail.ru) (MN); Tel.: +7-843-272-7324.

## Contents

|                                      |    |
|--------------------------------------|----|
| Compound characterization data ..... | 1  |
| The X-ray diffraction data.....      | 22 |
| Electrochemical measurements.....    | 27 |
| Cartesian Coordinates .....          | 30 |
| NMR spectra of compounds.....        | 33 |
| References .....                     | 82 |

## Compound characterization data

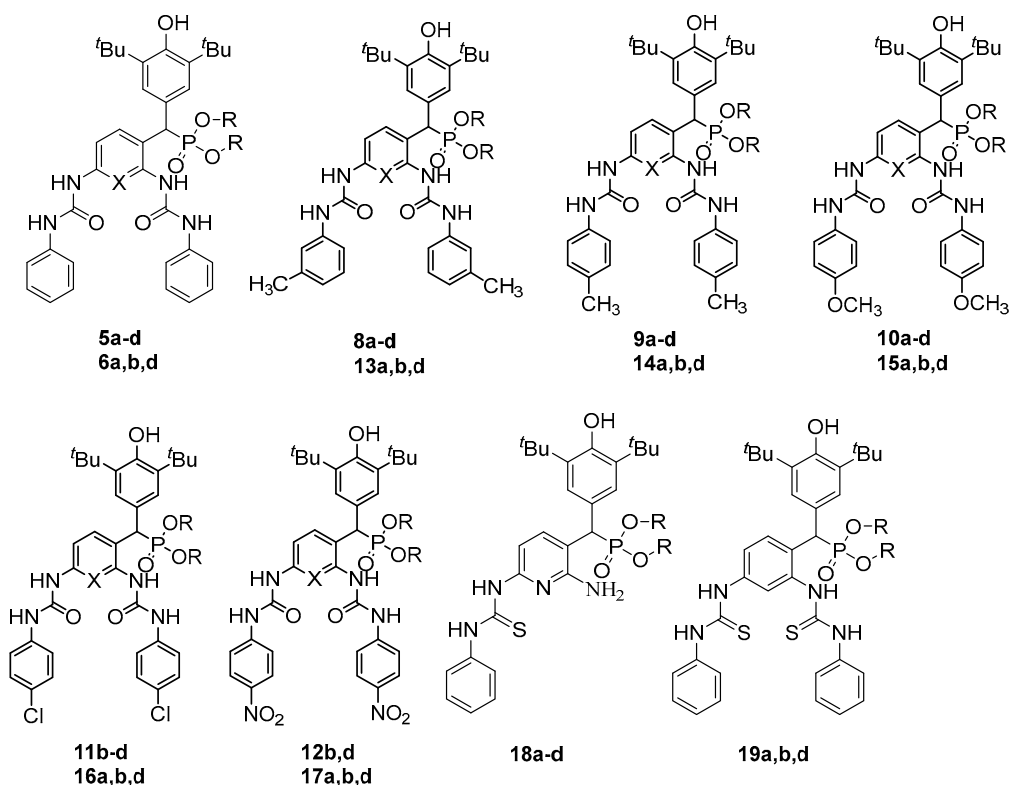

**Scheme 1.** Diarylmethylphosphonates containing sterically hindered phenols and (thio)urea moieties

The  $^1\text{H}$ - and  $^{13}\text{C}$ -NMR spectra were recorded on a Bruker AVANCE 400 spectrometer (Bruker BioSpin, Rheinstetten, Germany) operating at 400 MHz (for  $^1\text{H}$  NMR), 101 MHz (for  $^{13}\text{C}$  NMR) and 162 MHz (for  $^{31}\text{P}$  NMR); Bruker spectrometers AVANCEIII-500 (Bruker Corporation, Rheinstetten, Germany) operating at 500 MHz (for  $^1\text{H}$  NMR) and 126 MHz (for  $^{13}\text{C}$  NMR); Bruker spectrometers AVANCEIII-600 (Bruker Corporation, Rheinstetten, Germany) operating at 600.13 MHz (for  $^1\text{H}$  NMR), 150.19 MHz (for  $^{13}\text{C}$  NMR) and 242.94 MHz (for  $^{31}\text{P}$  NMR). Chemical shifts were measured in  $\delta$  (ppm) with reference to the solvent  $\delta = 2.56$  ppm and 39.52 ppm for  $\text{DMSO-d}_6$  for  $^1\text{H}$  and  $^{13}\text{C}$  NMR, respectively. IR spectra were recorded on IR Fourier spectrometer Tensor 37 (Bruker Optik GmbH, Germany) in the 400–3600  $\text{cm}^{-1}$  range in KBr. MALDI TOF/TOF-MS spectra were recorded on a Bruker Daltonics GmbH, Bremen, Germany instrument. Elemental analysis was performed on a CHNS-O Elemental Analyser EuroEA3028-HT-OM (EuroVector S.p.A., Milan, Italy). The melting points were determined on JK-MAM-4 Melting-point Apparatus with Microscope (SGW-X4 JINGKE SCIENTIFIC INSTRUMENT CO, Shanghai, China). The progress of reactions and the purity of products were monitored by TLC on Sorbfil UV-254 plates (Sorbpolimer, Krasnodar, Russia); the chromatograms were developed under UV light.

Dialkyl/diphenyl[(3,5-di-tert-butyl-4-hydroxyphenyl)(2,6-diaminopyridin-3-yl)methyl]phosphonate 3a-d (1.0 mmol) or dialkyl/diphenyl[(3,5-di-tert-butyl-4-

hydroxyphenyl)(2,4-diaminophenyl)methyl]phosphonate 4a,b,d was synthesized according to the literature [1,2].

**General procedure for the synthesis of compounds 5a-d; 6a,b,d; 8a-d - 10a-d; 11c,d - 12c,d; 13a,b,d - 17a,b,d.** To a 5 mL chloroform solution of dialkyl/diphenyl[(3,5-di-*tert*-butyl-4-hydroxyphenyl)(2,4-diaminophenyl)methyl]phosphonate 2a,b,d (1.0 mmol) or dialkyl/diphenyl[(3,5-di-*tert*-butyl-4-hydroxyphenyl)(2,6-diaminopyridin-3-yl)methyl]phosphonate 3a-d (1.0 mmol), the phenyl isocyanate (8.0 mmol), respective aryl isocyanate (8.0 - 12.0 mmol) or phenyl isothiocyanate (8.0 mmol) was added. The resulting solutions were on stirred until a precipitation formed at ambient temperature for **5a-d; 6a,b,d** - 4 h, for **8a-d** - 12 h and for **9a-d; 10a-d; 11c,d; 12c,d; 13a,b,d - 17a,b,d** 3 h, for **18a-d** and **19a,b,d** heated under reflux 15 h. The precipitate was filtered off, washed once with ethyl acetate and hexane and dried under vacuum (0.06 mm Hg) at 40 °C to constant weight. The resulting compounds were urea compounds **5a-d; 6a,b,d; 8a-d - 10a-d; 11c,d; 12c,d; 13a,b,d - 17a,b,d** (46–91% yield) and thiourea compounds **18a-d** and **19a,b,d** (70–80% yield) as into gray or white amorphous solids.

**Dimethyl[(2,6-bis(3-phenylureido)pyridin-3-yl)(3,5-di-*tert*-butyl-4-hydroxyphenyl)methyl]phosphonate 5a.** Gray-white solid, yield 0.57 g (85%), M.p.: 207–208°C. IR (KBr),  $\nu$ ,  $\text{cm}^{-1}$ : 757 (P–C), 1040, 1058 (P–O–C<sub>alk</sub>), 1228 (P=O), 1599 (C=C<sub>arom</sub>), 1677 (C=O), 3306 (NH), 3636 (OH). <sup>1</sup>H NMR (400.05 MHz, DMCO-*d*<sub>6</sub>),  $\delta$ , ppm: 1.34 [s, 18H, C(CH<sub>3</sub>)<sub>3</sub>], 3.54 (d, 3H, <sup>3</sup>J<sub>PH</sub> = 10.7 Hz, OCH<sub>3</sub>), 3.58 (d, 3H, <sup>3</sup>J<sub>PH</sub> = 10.7 Hz, OCH<sub>3</sub>), 4.93 (d, 1H, <sup>2</sup>J<sub>PH</sub> = 26.9 Hz, CHP), 6.93 (s, 1H, OH), 6.96 (d, 1H, <sup>3</sup>J<sub>HH</sub> = 8.0 Hz, CH<sub>py</sub>), 6.99 (t, 1H, <sup>3</sup>J<sub>HH</sub> = 7.4 Hz, NHC<sub>6</sub>H<sub>5</sub>), 7.04 (t, 1H, <sup>3</sup>J<sub>HH</sub> = 7.4 Hz, NHC<sub>6</sub>H<sub>5</sub>), 7.23 (t, 2H, <sup>3</sup>J<sub>HH</sub> = 7.9 Hz, NHC<sub>6</sub>H<sub>5</sub>), 7.30-7.34 [m, 4H, NHC<sub>6</sub>H<sub>5</sub> and CHCC(CH<sub>3</sub>)<sub>3</sub>], 7.59 (d, 2H, <sup>3</sup>J<sub>HH</sub> = 7.6 Hz, NHC<sub>6</sub>H<sub>5</sub>), 7.65 (d, 2H, <sup>3</sup>J<sub>HH</sub> = 7.7 Hz, NHC<sub>6</sub>H<sub>5</sub>), 8.02 (dd, 1H, <sup>3</sup>J<sub>HH</sub> = 8.5 Hz, <sup>4</sup>J<sub>PH</sub> = 1.5 Hz CH<sub>py</sub>), 9.00 (1H, NH), 9.50 (1H, NH), 9.86 (1H, NH), 10.51 (1H, NH). <sup>13</sup>C{<sup>1</sup>H} NMR (100.60 MHz, DMCO-*d*<sub>6</sub>),  $\delta$ , ppm: 30.81 [C(CH<sub>3</sub>)<sub>3</sub>], 35.07 [C(CH<sub>3</sub>)<sub>3</sub>], 41.66 (d, <sup>1</sup>J<sub>PC</sub> = 138.8 Hz, CHP), 53.04 (d, <sup>2</sup>J<sub>PC</sub> = 7.1 Hz, OCH<sub>3</sub>), 53.72 (d, <sup>2</sup>J<sub>PC</sub> = 6.9 Hz, OCH<sub>3</sub>), 106.24 (CH<sub>py</sub>), 114.72 (d, <sup>2</sup>J<sub>PC</sub> = 3.6 Hz, C<sub>py</sub>), 119.72 (NHC<sub>6</sub>H<sub>5</sub>), 120.02 (NHC<sub>6</sub>H<sub>5</sub>), 122.94 (NHC<sub>6</sub>H<sub>5</sub>), 123.03 (NHC<sub>6</sub>H<sub>5</sub>), 125.98 [d, <sup>3</sup>J<sub>PC</sub> = 7.9 Hz, CHCC(CH<sub>3</sub>)<sub>3</sub>], 126.84 (d, <sup>2</sup>J<sub>PC</sub> = 4.6 Hz, CCHP), 128.91 (NHC<sub>6</sub>H<sub>5</sub>), 129.16 (NHC<sub>6</sub>H<sub>5</sub>), 139.63 (NHC<sub>6</sub>H<sub>5</sub>), 139.68 [CC(CH<sub>3</sub>)<sub>3</sub>], 141.31 (d, <sup>3</sup>J<sub>PC</sub> = 5.0 Hz, CH<sub>py</sub>), 147.86 (d, <sup>3</sup>J<sub>PC</sub> = 10.7 Hz, C<sub>py</sub>), 150.09 (C<sub>py</sub>), 152.32 (C=O), 152.44 (C=O), 153.46 (COH). <sup>31</sup>P NMR (161.94 MHz, DMCO-*d*<sub>6</sub>),  $\delta$ , ppm: 28.54. Anal. Calcd for C<sub>36</sub>H<sub>44</sub>N<sub>5</sub>O<sub>6</sub>P (%): C, 64.18; H, 6.58; N, 10.39; P, 4.60. Found (%): C, 64.21; H, 6.60; N, 10.41; P, 4.63. HRMS (MALDI-TOF) *m/z* for C<sub>36</sub>H<sub>44</sub>N<sub>5</sub>O<sub>6</sub>P: calc. 673.30 [M]<sup>+</sup>, found 674.63 [M+H]<sup>+</sup>, 696.66 [M+Na]<sup>+</sup>, 712.59 [M+K]<sup>+</sup>.

**Diethyl[(2,6-bis(3-phenylureido)pyridin-3-yl)(3,5-di-*tert*-butyl-4-hydroxyphenyl)methyl]phosphonate 5b.** Gray-white solid, yield 0.56 g (80%), M.p.: 237–238°C. IR (KBr),  $\nu$ ,  $\text{cm}^{-1}$ : 758, 1022, 1049, 1228, 1600, 1667, 3314, 3632. <sup>1</sup>H NMR (600.13 MHz, DMCO-*d*<sub>6</sub>),  $\delta$ , ppm: 1.01 (t, 6H, <sup>3</sup>J<sub>HH</sub> = 7.0 Hz, OCH<sub>2</sub>CH<sub>3</sub>), 1.10 (t, 6H, <sup>3</sup>J<sub>HH</sub> = 6.9 Hz, OCH<sub>2</sub>CH<sub>3</sub>), 1.35 [s, 18H, C(CH<sub>3</sub>)<sub>3</sub>], 3.84 (m, 1H, OCH<sub>2</sub>CH<sub>3</sub>), 3.95 (m, 3H, OCH<sub>2</sub>CH<sub>3</sub>), 4.86 (d, 1H, <sup>2</sup>J<sub>PH</sub> = 27.5 Hz, CHP), 6.93 (s, 1H, OH), 6.94 (d, 1H, <sup>3</sup>J<sub>HH</sub> = 8.4 Hz, CH<sub>py</sub>), 6.99 (t, 1H, <sup>3</sup>J<sub>HH</sub> = 7.3 Hz, NHC<sub>6</sub>H<sub>5</sub>), 7.04 (t, 1H, <sup>3</sup>J<sub>HH</sub> = 7.3 Hz, NHC<sub>6</sub>H<sub>5</sub>), 7.24 (t, 2H, <sup>3</sup>J<sub>HH</sub> = 7.4 Hz, NHC<sub>6</sub>H<sub>5</sub>), 7.30-7.34 [m, 4H, NHC<sub>6</sub>H<sub>5</sub> and CHCC(CH<sub>3</sub>)<sub>3</sub>], 7.59 (d, 2H, <sup>3</sup>J<sub>HH</sub> = 7.8 Hz, NHC<sub>6</sub>H<sub>5</sub>), 7.67 (d, 2H, <sup>3</sup>J<sub>HH</sub> = 8.1 Hz, NHC<sub>6</sub>H<sub>5</sub>), 8.02 (d, 1H, <sup>3</sup>J<sub>HH</sub> = 7.9 Hz, CH<sub>py</sub>), 9.00 (1H, NH), 9.50 (1H, NH), 9.85 (1H, NH), 10.57 (1H, NH). <sup>13</sup>C{<sup>1</sup>H} NMR (150.19 MHz, DMCO-*d*<sub>6</sub>),  $\delta$ , ppm: 16.46 (d, <sup>3</sup>J<sub>PC</sub> = 5.4 Hz, OCH<sub>2</sub>CH<sub>3</sub>), 16.61 (d, <sup>3</sup>J<sub>PC</sub> = 5.4 Hz, OCH<sub>2</sub>CH<sub>3</sub>), 30.84 [C(CH<sub>3</sub>)<sub>3</sub>], 35.11 [C(CH<sub>3</sub>)<sub>3</sub>], 42.41 (d, <sup>1</sup>J<sub>PC</sub> = 138.4 Hz, CHP), 62.45 (d, <sup>2</sup>J<sub>PC</sub> = 6.3 Hz, OCH<sub>2</sub>CH<sub>3</sub>), 62.84

(d,  $^2J_{PC}$  = 6.3 Hz,  $OCH_2CH_3$ ), 106.12 ( $CH_{py}$ ), 114.90 ( $C_{py}$ ), 119.72 ( $NHC_6H_5$ ), 120.12 ( $NHC_6H_5$ ), 122.97 ( $NHC_6H_5$ ), 123.04 ( $NHC_6H_5$ ), 126.18 [d,  $^3J_{PC}$  = 7.1 Hz,  $CHCC(CH_3)_3$ ], 127.04 ( $CCHP$ ), 128.94 ( $NHC_6H_5$ ), 129.21 ( $NHC_6H_5$ ), 139.64 ( $NHC_6H_5$ ), 139.69 ( $NHC_6H_5$ ), 139.76 [ $CC(CH_3)_3$ ], 141.30 ( $CH_{py}$ ), 147.94 (d,  $^3J_{PC}$  = 10.1 Hz,  $C_{py}$ ), 150.05 ( $C_{py}$ ), 152.30 (C=O), 152.52 (C=O), 153.45 (COH).  $^{31}P$  NMR (161.94 MHz,  $DMCO-d_6$ ),  $\delta$ , ppm: 25.41. Anal. Calcd for  $C_{38}H_{48}N_5O_6P$  (%): C, 65.03; H, 6.89; N, 9.98; P, 4.41. Found (%): C, 64.98; H, 6.91; N, 9.94; P, 4.46. HRMS (MALDI-TOF)  $m/z$  for  $C_{38}H_{48}N_5O_6P$ : calc. 701.33  $[M]^+$ , found 702.61  $[M+H]^+$ , 724.65  $[M+Na]^+$ , 740.65  $[M+K]^+$ .

**Diisopropyl[(2,6-bis(3-phenylureido)pyridin-3-yl)(3,5-di-*tert*-butyl-4-hydroxyphenyl)methyl]phosphonate 5c.** Gray-white solid, yield 0.60 g (82%), M.p.: 138–139°C. IR (KBr),  $\nu$ ,  $cm^{-1}$ : 754, 993, 1235, 1598, 1713, 3367, 3629.  $^1H$  NMR (500.13 MHz,  $DMCO-d_6$ ),  $\delta$ , ppm: 0.82 [t, 3H,  $^3J_{HH}$  = 6.2 Hz,  $OCH(CH_3)_2$ ], 1.01 [t, 3H,  $^3J_{HH}$  = 6.2 Hz,  $OCH(CH_3)_2$ ], 1.06 [t, 3H,  $^3J_{HH}$  = 6.2 Hz,  $OCH(CH_3)_2$ ], 1.19 [t, 3H,  $^3J_{HH}$  = 6.2 Hz,  $OCH(CH_3)_2$ ], 1.35 [s, 18H,  $C(CH_3)_3$ ], 4.41 [m, 1H,  $OCH(CH_3)_2$ ], 4.52 [m, 1H,  $OCH(CH_3)_2$ ], 4.74 (d, 1H,  $^2J_{PH}$  = 26.9 Hz,  $CHP$ ), 6.90 (s, 1H, OH), 6.91 (d, 1H,  $^3J_{HH}$  = 7.5 Hz,  $CH_{py}$ ), 7.00 (t, 1H,  $^3J_{HH}$  = 7.4 Hz,  $NHC_6H_5$ ), 7.05 (t, 1H,  $^3J_{HH}$  = 7.4 Hz,  $NHC_6H_5$ ), 7.24 (t, 2H,  $^3J_{HH}$  = 7.4 Hz,  $NHC_6H_5$ ), 7.34 (t, 2H,  $^3J_{HH}$  = 7.4 Hz,  $NHC_6H_5$ ), 7.37 [s, 2H,  $CHCC(CH_3)_3$ ], 7.59 (d, 2H,  $^3J_{HH}$  = 8.5 Hz,  $NHC_6H_5$ ), 7.69 (d, 2H,  $^3J_{HH}$  = 7.6 Hz,  $NHC_6H_5$ ), 8.07 (dd, 1H,  $^3J_{HH}$  = 8.5 Hz,  $^4J_{PH}$  = 1.5 Hz,  $CH_{py}$ ), 9.03 (s, 1H, NH), 9.50 (s, 1H, NH), 9.57 (s, 1H, NH), 10.65 (s, 1H, NH).  $^{13}C\{^1H\}$  NMR (125.76 MHz,  $DMCO-d_6$ ),  $\delta$ , ppm: 22.51 [d,  $^3J_{PC}$  = 5.4 Hz,  $OCH(CH_3)_2$ ], 23.23 [d,  $^3J_{PC}$  = 5.3 Hz,  $OCH(CH_3)_2$ ], 24.20 [d,  $^3J_{PC}$  = 3.3 Hz,  $OCH(CH_3)_2$ ], 24.48 [d,  $^3J_{PC}$  = 2.7 Hz,  $OCH(CH_3)_2$ ], 30.78 [ $C(CH_3)_3$ ], 35.07 [ $C(CH_3)_3$ ], 43.24 (all d,  $^1J_{PC}$  = 139.4 Hz,  $CHP$ ), 70.71 [d,  $^2J_{PC}$  = 7.3 Hz,  $OCH(CH_3)_2$ ], 71.39 [d,  $^2J_{PC}$  = 7.1 Hz,  $OCH(CH_3)_2$ ], 105.94 ( $CH_{py}$ ), 116.09 ( $C_{py}$ ), 119.57 ( $NHC_6H_5$ ), 120.17 ( $NHC_6H_5$ ), 122.27 ( $NHC_6H_5$ ), 122.96 ( $NHC_6H_5$ ), 126.30 [d,  $^3J_{PC}$  = 8.0 Hz,  $CHCC(CH_3)_3$ ], 128.87 ( $CCHP$ ), 129.20 ( $NHC_6H_5$ ), 129.23 ( $NHC_6H_5$ ), 139.59 [ $CC(CH_3)_3$ ], 139.68 ( $NHC_6H_5$ ), 139.74 ( $NHC_6H_5$ ), 141.06 ( $CH_{py}$ ), 147.85 (d,  $^3J_{PC}$  = 10.5 Hz,  $C_{py}$ ), 149.95 ( $C_{py}$ ), 152.17 (C=O), 152.19 (C=O), 153.38 (OH).  $^{31}P$  NMR (202.46 MHz,  $DMCO-d_6$ ),  $\delta$ , ppm: 25.92. Anal. Calcd for  $C_{40}H_{52}N_5O_6P$  (%): C, 65.83; H, 7.18; N, 9.60; P, 4.24. Found (%): C, 65.81; H, 7.20; N, 9.63; P, 4.22. HRMS (MALDI-TOF)  $m/z$  for  $C_{40}H_{52}N_5O_6P$ : calc. 729.37  $[M]^+$ , found 730.72  $[M+H]^+$ .

**Diphenyl[(2,6-bis(3-phenylureido)pyridin-3-yl)(3,5-di-*tert*-butyl-4-hydroxyphenyl)methyl]phosphonate 5d.** Gray-white solid, yield 0.65 g (81%), M.p.: 128–129°C. IR (KBr),  $\nu$ ,  $cm^{-1}$ : 754, 938, 1236, 1597, 1721, 3242, 3625.  $^1H$  NMR (500.13 MHz,  $DMCO-d_6$ ),  $\delta$ , ppm: 1.23, 1.31, 1.34, 1.35 [all s, 18H,  $C(CH_3)_3$ ], 4.93, 5.01, 5.47, 5.84 (all d, 1H,  $^2J_{PH}$  = 26.8 Hz,  $CHP$ ), 6.63 (d, 2H,  $^3J_{HH}$  = 8.3 Hz,  $OC_6H_5$ ), 6.70 (d, 2H,  $^3J_{HH}$  = 8.4 Hz,  $OC_6H_5$ ), 6.92, 6.98 (all s, 1H, OH), 7.00–7.36 [m, 7H,  $CH_{py}$ ,  $NHC_6H_5$ ,  $CHCC(CH_3)_3$  and  $OC_6H_5$ ], 7.47 (t, 2H,  $^3J_{HH}$  = 7.2 Hz,  $OC_6H_5$ ), 7.51 (d, 2H,  $^3J_{HH}$  = 7.1 Hz,  $OC_6H_5$ ), 7.57 (d, 2H,  $^3J_{HH}$  = 7.5 Hz,  $OC_6H_5$ ), 7.62 (d, 2H,  $^3J_{HH}$  = 7.6 Hz,  $NHC_6H_5$ ), 7.69 (d, 2H,  $^3J_{HH}$  = 7.6 Hz,  $NHC_6H_5$ ), 8.20, 8.30, 8.53 (all d, 1H,  $^3J_{HH}$  = 8.5 Hz,  $CH_{py}$ ), 8.64, 9.13 (all s, 1H, NH), 9.57 (s, 1H, NH), 9.18, 9.86 (all s, 1H, NH), 10.53, 11.02 (s, 1H, NH).  $^{13}C\{^1H\}$  NMR (125.76 MHz,  $DMCO-d_6$ ),  $\delta$ , ppm: 30.38, 30.61, 30.68 [ $C(CH_3)_3$ ], 34.82, 34.99, 35.07 [ $C(CH_3)_3$ ], 42.80, 43.24, 44.84 (d,  $^1J_{PC}$  = 139.6 Hz,  $CHP$ ), 106.40, 107.23, 108.63, 113.59 ( $CH_{py}$ ), 113.60, 113.71 ( $C_{py}$ ), 118.67 ( $OC_6H_5$ ), 119.05 ( $OC_6H_5$ ), 119.98 ( $NHC_6H_5$ ), 119.78 ( $NHC_6H_5$ ), 119.98 ( $OC_6H_5$ ), 120.06 ( $OC_6H_5$ ), 120.58, 120.75 ( $OC_6H_5$ ), 120.82, 121.00 ( $OC_6H_5$ ), 122.12 ( $OC_6H_5$ ), 122.85 ( $OC_6H_5$ ), 122.99 ( $NHC_6H_5$ ), 123.10 ( $NHC_6H_5$ ), 124.64, 125.44, 125.74 [all d,  $^3J_{PC}$  = 7.2 Hz,  $CHCC(CH_3)_3$ ], 126.53, 126.62, 126.76 (all d,  $^2J_{PC}$  = 7.2 Hz,  $CCHP$ ), 128.84, 128.94 ( $OC_6H_5$ ), 129.23, 129.41 ( $OC_6H_5$ ), 129.92, 129.99 ( $NHC_6H_5$ ), 130.20, 130.29 ( $NHC_6H_5$ ), 139.26, 139.58 ( $NHC_6H_5$ ), 139.63 ( $NHC_6H_5$ ), 139.69 [ $CC(CH_3)_3$ ], 140.14, 141.13 ( $CH_{py}$ ), 146.36, 147.12, 148.08 (all d,  $^3J_{PC}$  = 6.7 Hz,  $C_{py}$ ), 150.26, 150.34, 150.71 ( $C_{py}$ ), 152.33, 152.38, 152.43 (d,  $^2J_{PC}$  = 6.2 Hz,  $OC_6H_5$ ), 153.01 (C=O), 153.10 (C=O), 153.94,



154.13, 154.99 (COH).  $^{31}\text{P}$  NMR (202.46 MHz,  $\text{DMCO-}d_6$ ),  $\delta$ , ppm: 18.41, 18.51, 19.29, 19.37. Anal. Calcd for  $\text{C}_{46}\text{H}_{48}\text{N}_5\text{O}_6\text{P}$  (%): C, 69.25; H, 6.06; N, 8.78; P, 3.88. Found (%): C, 69.27; H, 6.09; N, 8.80; P, 3.91. HRMS (MALDI-TOF)  $m/z$  for  $\text{C}_{46}\text{H}_{48}\text{N}_5\text{O}_6\text{P}$ : calc. 797.33  $[\text{M}]^+$ , found 798.72  $[\text{M}+\text{H}]^+$ .

**Dimethyl[(2,4-bis(3-phenylureido)phenyl)(3,5-di-*tert*-butyl-4-hydroxyphenyl)methyl]phosphonate 6a.** White solid, yield 0.60 g (90%), M.p.: 240–241°C. IR (KBr),  $\nu$ ,  $\text{cm}^{-1}$ : 754, 1038, 1058, 1222, 1600, 1641; 3326, 3628.  $^1\text{H}$  NMR (500.13 MHz,  $\text{DMCO-}d_6$ ),  $\delta$ , ppm: 1.33 [s, 18H,  $\text{C}(\text{CH}_3)_3$ ], 3.50 (d, 3H,  $^3J_{\text{PH}}=10.6$  Hz,  $\text{OCH}_3$ ), 3.52 (d, 3H,  $^3J_{\text{PH}}=10.6$  Hz,  $\text{OCH}_3$ ), 4.75 (d, 1H,  $^2J_{\text{PH}}=26.4$  Hz, CHP), 6.87 (s, 1H, OH), 6.97 (t, 2H,  $^3J_{\text{HH}}=7.3$  Hz,  $\text{NHC}_6\text{H}_5$ ), 7.26–7.29 [m, 5H,  $\text{CH}_{\text{arom}}$ ,  $\text{NHC}_6\text{H}_5$ ], 7.31 [s, 2H,  $\text{CHCC}(\text{CH}_3)_3$ ], 7.45 (t, 2H,  $^3J_{\text{HH}}=8.0$  Hz,  $\text{NHC}_6\text{H}_5$ ), 7.66 (dd, 1H,  $^3J_{\text{HH}}=8.6$  Hz,  $^4J_{\text{PH}}=1.5$  Hz,  $\text{CH}_{\text{arom}}$ ), 7.77 (s, 1H,  $\text{CH}_{\text{arom}}$ ), 8.18 (s, 1H, NH), 8.57 (s, 1H, NH), 8.70 (s, 1H, NH), 8.85 (s, 1H, NH).  $^{13}\text{C}\{^1\text{H}\}$  NMR (125.76 MHz,  $\text{DMCO-}d_6$ ),  $\delta$ , ppm: 30.81 [ $\text{C}(\text{CH}_3)_3$ ], 35.01 [ $\text{C}(\text{CH}_3)_3$ ], 42.54 (d,  $^1J_{\text{PC}}=139.8$  Hz, CHP), 53.34 (d,  $^2J_{\text{PC}}=7.1$  Hz,  $\text{OCH}_3$ ), 53.42 (d,  $^2J_{\text{PC}}=7.1$  Hz,  $\text{OCH}_3$ ), 114.45 ( $\text{CH}_{\text{arom}}$ ), 114.86 ( $\text{CH}_{\text{arom}}$ ), 118.49 ( $\text{NHC}_6\text{H}_5$ ), 118.64 ( $\text{NHC}_6\text{H}_5$ ), 122.20 ( $\text{NHC}_6\text{H}_5$ ), 122.29 ( $\text{NHC}_6\text{H}_5$ ), 123.63 ( $\text{CCHP}$ ), 126.00 [d,  $^3J_{\text{PC}}=8.0$  Hz,  $\text{CHCC}(\text{CH}_3)_3$ ], 127.80 (d,  $^2J_{\text{PC}}=4.3$  Hz,  $\text{C}_{\text{arom}}$ ), 129.23 ( $\text{NHC}_6\text{H}_5$ ), 129.83 ( $\text{CH}_{\text{arom}}$ ), 137.10 (d,  $^3J_{\text{PC}}=10.5$  Hz,  $\text{C}_{\text{arom}}$ ), 139.09 ( $\text{C}_{\text{arom}}$ ), 139.48 [ $\text{CC}(\text{CH}_3)_3$ ], 140.12 ( $\text{NHC}_6\text{H}_5$ ), 140.34 ( $\text{NHC}_6\text{H}_5$ ), 152.87 (C=O), 153.23 (COH), 153.36 (C=O).  $^{31}\text{P}$  NMR (202.46 MHz,  $\text{DMCO-}d_6$ ),  $\delta$ , ppm: 28.75. Anal. Calcd for  $\text{C}_{37}\text{H}_{45}\text{N}_4\text{O}_6\text{P}$  (%): C, 66.06; H, 6.74; N, 8.33; P, 4.60. Found (%): C, 66.01; H, 6.73; N, 8.35; P, 4.58. HRMS (MALDI-TOF)  $m/z$  for  $\text{C}_{37}\text{H}_{45}\text{N}_4\text{O}_6\text{P}$ : calc. 672.57  $[\text{M}]^+$ , found 695.58  $[\text{M}+\text{Na}]^+$ , 711.62  $[\text{M}+\text{K}]^+$ .

**Diethyl[(2,4-bis(3-phenylureido)phenyl)(3,5-di-*tert*-butyl-4-hydroxyphenyl)methyl]phosphonate 6b.** White solid, yield 0.59 g (85%), M.p.: 245–246°C. IR (KBr),  $\nu$ ,  $\text{cm}^{-1}$ : 758, 1022, 1049, 1228, 1600, 1667, 3313, 3633.  $^1\text{H}$  NMR (600.13 MHz,  $\text{DMCO-}d_6$ ),  $\delta$ , ppm: 1.00 (t, 3H,  $^3J_{\text{HH}}=7.1$  Hz,  $\text{OCH}_2\text{CH}_3$ ), 1.07 (t, 3H,  $^3J_{\text{HH}}=7.1$  Hz,  $\text{OCH}_2\text{CH}_3$ ), 1.32 [s, 18H,  $\text{C}(\text{CH}_3)_3$ ], 3.77 (m, 1H,  $\text{OCH}_2\text{CH}_3$ ), 3.83 (m, 1H,  $\text{OCH}_2\text{CH}_3$ ), 3.90 (m, 2H,  $\text{OCH}_2\text{CH}_3$ ), 4.68 (d, 1H,  $^2J_{\text{PH}}=26.2$  Hz, CHP), 6.83 (s, 1H, OH), 6.96 (t, 2H,  $^3J_{\text{HH}}=6.5$  Hz,  $\text{NHC}_6\text{H}_5$ ), 6.24–7.29 (m, 5H,  $\text{CH}_{\text{arom}}$  and  $\text{NHC}_6\text{H}_5$ ), 7.30 [s, 2H,  $\text{CHCC}(\text{CH}_3)_3$ ], 7.44 (t, 4H,  $^3J_{\text{HH}}=8.3$  Hz,  $\text{NHC}_6\text{H}_5$ ), 7.67 (dd, 1H,  $^3J_{\text{HH}}=8.3$  Hz,  $^4J_{\text{PH}}=0.9$  Hz,  $\text{CH}_{\text{arom}}$ ), 7.77 (d, 1H,  $^4J_{\text{HP}}=1.5$  Hz,  $\text{CH}_{\text{arom}}$ ), 8.16 (s, 1H, NH), 8.56 (s, 1H, NH), 8.68 (s, 1H, NH), 8.87 (s, 1H, NH).  $^{13}\text{C}\{^1\text{H}\}$  NMR (150.19 MHz,  $\text{DMCO-}d_6$ ),  $\delta$ , ppm: 16.43 (d,  $^3J_{\text{PC}}=5.5$  Hz,  $\text{OCH}_2\text{CH}_3$ ), 16.59 (d,  $^3J_{\text{PC}}=5.2$  Hz,  $\text{OCH}_2\text{CH}_3$ ), 30.79 [s,  $\text{C}(\text{CH}_3)_3$ ], 35.00 [ $\text{C}(\text{CH}_3)_3$ ], 43.15 (d,  $^1J_{\text{PC}}=139.0$  Hz, CHP), 62.27 (d,  $^2J_{\text{PC}}=6.7$  Hz,  $\text{OCH}_2\text{CH}_3$ ), 62.53 (d,  $^2J_{\text{PC}}=6.8$  Hz,  $\text{OCH}_2\text{CH}_3$ ), 114.15 ( $\text{CH}_{\text{arom}}$ ), 114.47 ( $\text{CH}_{\text{arom}}$ ), 118.47 ( $\text{NHC}_6\text{H}_5$ ), 118.64 ( $\text{NHC}_6\text{H}_5$ ), 122.17 ( $\text{NHC}_6\text{H}_5$ ), 122.27 ( $\text{NHC}_6\text{H}_5$ ), 123.50 ( $\text{C}_{\text{arom}}$ ), 126.13 [d,  $^3J_{\text{PC}}=7.9$  Hz,  $\text{CHCC}(\text{CH}_3)_3$ ], 127.94 ( $\text{CCHP}$ ), 129.22 ( $\text{NHC}_6\text{H}_5$ ), 129.80 (d,  $^3J_{\text{PC}}=4.8$  Hz,  $\text{CH}_{\text{arom}}$ ), 137.22 (d,  $^3J_{\text{PC}}=11.4$  Hz,  $\text{C}_{\text{arom}}$ ), 139.04 ( $\text{C}_{\text{arom}}$ ), 139.39 [ $\text{CC}(\text{CH}_3)_3$ ], 140.12 ( $\text{NHC}_6\text{H}_5$ ), 140.35 ( $\text{NHC}_6\text{H}_5$ ), 152.87 (C=O), 153.15 (s, COH), 153.29 (C=O).  $^{31}\text{P}$  NMR (242.94 MHz,  $\text{DMCO-}d_6$ ),  $\delta$ , ppm: 26.72. Anal. Calcd for  $\text{C}_{39}\text{H}_{49}\text{N}_4\text{O}_6\text{P}$  (%): C, 66.84; H, 7.05; N, 7.99; P, 4.42. Found (%): C, 66.87; H, 7.02; N, 8.01; P, 4.45. HRMS (MALDI-TOF)  $m/z$  for  $\text{C}_{39}\text{H}_{49}\text{N}_4\text{O}_6\text{P}$ : calc. 700.34  $[\text{M}]^+$ , found 723.06  $[\text{M}+\text{Na}]^+$ , 738.95  $[\text{M}+\text{K}]^+$ .

**Diphenyl[(2,4-bis(3-phenylureido)phenyl)(3,5-di-*tert*-butyl-4-hydroxyphenyl)methyl]phosphonate 6d.** White solid, yield 0.71 g (90%), M.p.: 251–252 °C. IR (KBr),  $\nu$ ,  $\text{cm}^{-1}$ : 752, 936, 1209, 1599, 1644, 3329, 3627.  $^1\text{H}$  NMR (600.13 MHz,  $\text{DMCO-}d_6$ ),  $\delta$ , ppm: 1.29 [s, 18H,  $\text{C}(\text{CH}_3)_3$ ], 5.20 (d, 1H,  $^2J_{\text{PH}}=27.5$  Hz, CHP), 6.64 (d, 2H,  $^3J_{\text{HH}}=8.0$  Hz,  $\text{OC}_6\text{H}_5$ ), 6.93 (s, 1H, OH), 6.95–6.99 (m, 4H,  $\text{OC}_6\text{H}_5$  and  $\text{NHC}_6\text{H}_5$ ), 7.09 (t, 1H,  $^3J_{\text{HH}}=7.4$  Hz,  $\text{OC}_6\text{H}_5$ ), 7.16–7.21 (m, 3H,  $\text{OC}_6\text{H}_5$ ), 7.26–7.32 (m, 7H,  $\text{CH}_{\text{arom}}$ ,  $\text{OC}_6\text{H}_5$  and  $\text{NHC}_6\text{H}_5$ ), 7.39 [s, 2H,  $\text{CHCC}(\text{CH}_3)_3$ ], 7.45 (d, 2H,  $^3J_{\text{HH}}=8.0$  Hz,  $\text{NHC}_6\text{H}_5$ ), 7.47 (d, 2H,  $^3J_{\text{HH}}=8.0$  Hz,  $\text{NHC}_6\text{H}_5$ ), 7.82 (d, 1H,  $^3J_{\text{HH}}=7.7$  Hz,  $\text{CH}_{\text{arom}}$ ), 7.83 (s, 1H,  $\text{CH}_{\text{arom}}$ ), 8.27 (1H, NH), 8.59 (1H, NH), 8.75 (1H, NH), 8.85 (1H, NH).  $^{13}\text{C}\{^1\text{H}\}$  NMR (150.19

MHz, DMCO-*d*<sub>6</sub>),  $\delta$ , ppm: 30.70 [C(CH<sub>3</sub>)<sub>3</sub>], 35.02 [C(CH<sub>3</sub>)<sub>3</sub>], 43.76 (d, <sup>1</sup>J<sub>PC</sub> = 140.5 Hz, CHP), 114.67 (CH<sub>arom</sub>), 115.14 (CH<sub>arom</sub>), 118.57 (NHC<sub>6</sub>H<sub>5</sub>), 118.71 (NHC<sub>6</sub>H<sub>5</sub>), 120.63 (OC<sub>6</sub>H<sub>5</sub>), 120.94 (OC<sub>6</sub>H<sub>5</sub>), 122.29 (NHC<sub>6</sub>H<sub>5</sub>), 122.36 (NHC<sub>6</sub>H<sub>5</sub>), 122.90 (C<sub>arom</sub>), 125.40 (OC<sub>6</sub>H<sub>5</sub>), 125.68 (OC<sub>6</sub>H<sub>5</sub>), 126.27 (CCHP), 126.55 [d, <sup>3</sup>J<sub>PC</sub> = 7.8 Hz, CHCC(CH<sub>3</sub>)<sub>3</sub>], 129.27 (NHC<sub>6</sub>H<sub>5</sub>), 129.71 (CH<sub>arom</sub>), 129.95 (OC<sub>6</sub>H<sub>5</sub>), 130.26 (OC<sub>6</sub>H<sub>5</sub>), 137.45 (d, <sup>3</sup>J<sub>PC</sub> = 11.6 Hz, C<sub>arom</sub>), 139.56 (C<sub>arom</sub>), 139.75 [CC(CH<sub>3</sub>)<sub>3</sub>], 140.12 (NHC<sub>6</sub>H<sub>5</sub>), 140.32 (NHC<sub>6</sub>H<sub>5</sub>), 150.47 (d, <sup>2</sup>J<sub>PC</sub> = 10.0 Hz, OC<sub>6</sub>H<sub>5</sub>), 150.80 (d, <sup>2</sup>J<sub>PC</sub> = 8.9 Hz, OC<sub>6</sub>H<sub>5</sub>), 152.89 (C=O), 153.43 (C=O), 153.73 (s, COH). <sup>31</sup>P NMR (242.94 MHz, DMCO-*d*<sub>6</sub>),  $\delta$ , ppm: 20.22. Anal. Calcd for C<sub>47</sub>H<sub>49</sub>N<sub>4</sub>O<sub>6</sub>P (%): C, 70.84; H, 6.20; N, 7.03; P, 3.89. Found (%): C, 70.87; H, 6.26; N, 7.06; P, 3.94. HRMS (MALDI-TOF) *m/z* for C<sub>47</sub>H<sub>49</sub>N<sub>4</sub>O<sub>6</sub>P: calc. 796.34 [M]<sup>+</sup>, found 819.33 [M+Na]<sup>+</sup>, 835.35 [M+K]<sup>+</sup>.

**Dimethyl[(2-amino-6-(3-phenylureido)pyridin-3-yl)(3,5-di-*tert*-butyl-4-hydroxyphenyl)methyl]phosphonate 7a.** To a solution of **3a** (1 mmol) in 5 mL of chloroform were added phenyl isocyanate (2 mmol). The reaction mixture was stirred at ambient temperature for 2 h. The precipitate was filtered off, washed with hexane. From the mixture with **5a** were isolated **7a** white crystals in trace amounts. <sup>1</sup>H NMR (600.13 MHz, DMCO-*d*<sub>6</sub>),  $\delta$ , ppm: 1.35 [s, 18H, C(CH<sub>3</sub>)<sub>3</sub>], 3.48 (d, 3H, <sup>3</sup>J<sub>HH</sub> = 10.3 Hz, OCH<sub>3</sub>), 3.55 (d, 3H, <sup>3</sup>J<sub>HH</sub> = 10.3 Hz, OCH<sub>3</sub>), 5.01 (d, 1H, <sup>2</sup>J<sub>PH</sub> = 27.2 Hz, CHP), 6.15 (d, 1H, <sup>3</sup>J<sub>HH</sub> = 8.6 Hz, CH<sub>py</sub>), 6.31 (br.s, 2H, NH<sub>2</sub>), 6.90 (s, 1H, OH), 6.99 (t, 1H, <sup>3</sup>J<sub>HH</sub> = 7.3 Hz, NHC<sub>6</sub>H<sub>5</sub>), 7.23 (t, 1H, <sup>3</sup>J<sub>HH</sub> = 7.4 Hz, NHC<sub>6</sub>H<sub>5</sub>), 7.22-7.34 [m, 3H, NHC<sub>6</sub>H<sub>5</sub> and CHCC(CH<sub>3</sub>)<sub>3</sub>], 7.66 (d, 2H, <sup>3</sup>J<sub>HH</sub> = 8.3 Hz, NHC<sub>6</sub>H<sub>5</sub>), 7.80 (d, 1H, <sup>3</sup>J<sub>HH</sub> = 8.6 Hz, CH<sub>py</sub>), 8.70 (s, 1H, NH), 11.85 (s, 1H, NH). <sup>31</sup>P NMR (242.94 MHz, DMCO-*d*<sub>6</sub>),  $\delta$ , ppm: 29.04. HRMS (MALDI-TOF) *m/z* for C<sub>29</sub>H<sub>39</sub>N<sub>4</sub>O<sub>5</sub>P: calc. 554.27 [M]<sup>+</sup>, found 555.30 [M+H]<sup>+</sup>.

**Diethyl[(2-amino-6-(3-phenylureido)pyridin-3-yl)(3,5-di-*tert*-butyl-4-hydroxyphenyl)methyl]phosphonate 7b.** Similar to the previous one from **3b**. White crystals **7b** in trace amounts were isolated from the mixture. <sup>1</sup>H NMR (600.13 MHz, DMCO-*d*<sub>6</sub>),  $\delta$ , ppm: 1.02 (t, 3H, <sup>3</sup>J<sub>HH</sub> = 7.2 Hz, OCH<sub>2</sub>CH<sub>3</sub>), 1.09 (t, 3H, <sup>3</sup>J<sub>HH</sub> = 7.1 Hz, OCH<sub>2</sub>CH<sub>3</sub>), 1.34 [s, 18H, C(CH<sub>3</sub>)<sub>3</sub>], 3.84 (m, 1H, OCH<sub>2</sub>CH<sub>3</sub>), 3.94 (m, 3H, OCH<sub>2</sub>CH<sub>3</sub>), 4.93 (d, 1H, <sup>2</sup>J<sub>PH</sub> = 27.4 Hz, CHP), 6.14 (d, 1H, <sup>3</sup>J<sub>HH</sub> = 8.4 Hz, CH<sub>py</sub>), 6.29 (br.s, 2H, NH<sub>2</sub>), 6.83 (s, 1H, OH), 6.99 (t, 1H, <sup>3</sup>J<sub>HH</sub> = 7.2 Hz, NHC<sub>6</sub>H<sub>5</sub>), 7.23 (t, 1H, <sup>3</sup>J<sub>HH</sub> = 7.4 Hz, NHC<sub>6</sub>H<sub>5</sub>), 7.22-7.34 [m, 3H, NHC<sub>6</sub>H<sub>5</sub> and CHCC(CH<sub>3</sub>)<sub>3</sub>], 7.66 (d, 2H, <sup>3</sup>J<sub>HH</sub> = 8.5 Hz, NHC<sub>6</sub>H<sub>5</sub>), 7.83 (d, 1H, <sup>3</sup>J<sub>HH</sub> = 8.2 Hz, CH<sub>py</sub>), 8.70 (s, 1H, NH), 11.86 (s, 1H, NH). <sup>31</sup>P NMR (DMCO-*d*<sub>6</sub>, 242.94 MHz),  $\delta$ , ppm: 26.64. HRMS (MALDI-TOF) *m/z* for C<sub>31</sub>H<sub>43</sub>N<sub>4</sub>O<sub>5</sub>P: calc. 582.30 [M]<sup>+</sup>, found 583.47 [M+H]<sup>+</sup>.

**Dimethyl[(2,6-bis(3-(*m*-tolyl)ureido)pyridin-3-yl)(3,5-di-*tert*-butyl-4-hydroxyphenyl)methyl]phosphonate 8a.** White solid, yield 75%, M.p.: 201-202°C. IR (KBr),  $\nu$ , cm<sup>-1</sup>: 774; 1027; 1240; 1564; 1655; 1711; 2954; 3367; 3544. <sup>1</sup>H NMR (DMSO-*d*<sub>6</sub>, 399.93 MHz),  $\delta$ , ppm: 1.35 [s, 18H, C(CH<sub>3</sub>)<sub>3</sub>], 2.20 (s, 3H, CH<sub>3</sub>), 2.28 (s, 3H, CH<sub>3</sub>), 3.54 (d, 3H, OCH<sub>3</sub>, <sup>3</sup>J<sub>PH</sub> = 6.9), 3.58 (d, 3H, OCH<sub>3</sub>, <sup>3</sup>J<sub>PH</sub> = 7.1), 4.92 (d, 1H, CHP, <sup>2</sup>J<sub>PH</sub> 26.7), 6.81 (d, 1H, NHC<sub>6</sub>H<sub>4</sub>CH<sub>3</sub>, <sup>3</sup>J<sub>HH</sub> = 7.5), 6.85 (d, 1H, NHC<sub>6</sub>H<sub>4</sub>CH<sub>3</sub>, <sup>3</sup>J<sub>HH</sub> = 7.5), 6.90 (d, 1H, CH<sub>py</sub>, <sup>3</sup>J<sub>HH</sub> = 8.4), 6.93 (s, 1H, OH), 7.11 (t, 1H, NHC<sub>6</sub>H<sub>4</sub>CH<sub>3</sub>, <sup>3</sup>J<sub>HH</sub> = 7.8), 7.19 (t, 1H, NHC<sub>6</sub>H<sub>4</sub>CH<sub>3</sub>, <sup>3</sup>J<sub>HH</sub> = 8.0), 7.32 (s, 2H, CHCC(CH<sub>3</sub>)<sub>3</sub>), 7.40 (s, 1H, NHC<sub>6</sub>H<sub>4</sub>CH<sub>3</sub>), 7.40 (d, 1H, NHC<sub>6</sub>H<sub>4</sub>CH<sub>3</sub>, <sup>3</sup>J<sub>HH</sub> = 8.0), 7.45 (s, 1H, NHC<sub>6</sub>H<sub>4</sub>CH<sub>3</sub>), 7.50 (d, 2H, NHC<sub>6</sub>H<sub>4</sub>CH<sub>3</sub>, <sup>3</sup>J<sub>HH</sub> = 8.1), 8.01 (d, 1H, CH<sub>py</sub>, <sup>3</sup>J<sub>HH</sub> = 8.5), 8.95 (s, 1H, NH), 9.50 (s, 1H, NH), 9.74 (s, 1H, NH), 10.51 (s, 1H, NH). <sup>13</sup>C{<sup>1</sup>H} NMR (DMSO-*d*<sub>6</sub>, 125.76 MHz),  $\delta$ , ppm: 21.55 (CH<sub>3</sub>), 21.71 (CH<sub>3</sub>), 30.85 [C(CH<sub>3</sub>)<sub>3</sub>], 35.11 [C(CH<sub>3</sub>)<sub>3</sub>], 41.73 (d, CHP, <sup>1</sup>J<sub>PC</sub> = 138.9), 53.44 (d, POCH<sub>3</sub>, <sup>2</sup>J<sub>PC</sub> = 6.0), 53.74 (d, POCH<sub>3</sub>, <sup>2</sup>J<sub>PC</sub> = 6.0), 106.20 (CH<sub>py</sub>); 114.63 (C<sub>py</sub>), 116.87 (NHC<sub>6</sub>H<sub>4</sub>CH<sub>3</sub>), 117.28 (NHC<sub>6</sub>H<sub>4</sub>CH<sub>3</sub>), 120.18 (NHC<sub>6</sub>H<sub>4</sub>CH<sub>3</sub>), 120.58 (NHC<sub>6</sub>H<sub>4</sub>CH<sub>3</sub>), 123.67 (NHC<sub>6</sub>H<sub>4</sub>CH<sub>3</sub>), 123.73 (NHC<sub>6</sub>H<sub>4</sub>CH<sub>3</sub>), 126.00 [CHCC(CH<sub>3</sub>)<sub>2</sub>], 126.05 [CHCC(CH<sub>3</sub>)<sub>2</sub>], 126.89 (d, CCHP, <sup>2</sup>J<sub>PC</sub> = 3.0), 128.75 (NHC<sub>6</sub>H<sub>4</sub>CH<sub>3</sub>), 129.02 (NHC<sub>6</sub>H<sub>4</sub>CH<sub>3</sub>), 138.16

(NHC<sub>6</sub>H<sub>4</sub>CH<sub>3</sub>), 138.37 (NHC<sub>6</sub>H<sub>4</sub>CH<sub>3</sub>), 139.65 (NHC<sub>6</sub>H<sub>4</sub>CH<sub>3</sub>), 139.70 (NHC<sub>6</sub>H<sub>4</sub>CH<sub>3</sub>), 139.72 [C<sub>6</sub>(CH<sub>3</sub>)<sub>3</sub>], 141.29 (d, CH<sub>py</sub>, <sup>3</sup>J<sub>PC</sub> = 3.0), 147.88 (d, C<sub>py</sub>, <sup>3</sup>J<sub>PC</sub> = 10.6), 150.19 (C<sub>py</sub>), 152.24 (C=O), 152.46 (C=O), 153.50 (COH). <sup>31</sup>P NMR (DMSO-*d*<sub>6</sub>, 202.46 MHz), δ, ppm: 28.15. Anal. Calcd for C<sub>38</sub>H<sub>48</sub>N<sub>5</sub>O<sub>6</sub>P (%): C, 65.03; H, 6.89; N, 9.98; P, 4.41. Found (%): C, 65.02; H, 6.91; N, 9.99; P, 4.42. HRMS (MALDI-TOF) m/z for C<sub>38</sub>H<sub>48</sub>N<sub>5</sub>O<sub>6</sub>P: calc. 701.3 [M]<sup>+</sup>, found 702.6 [M+H]<sup>+</sup>; 724.6 [M+Na]<sup>+</sup>, 740.6 [M+K]<sup>+</sup>.

**Diethyl((2,6-bis(3-(*m*-tolyl)ureido)pyridin-3-yl)(3,5-di-*tert*-butyl-4-hydroxyphenyl)methyl) phosphonate 8b.** White solid, yield 63%, M.p.: 201-202°C. IR (KBr), ν, cm<sup>-1</sup>: 776; 1025; 1200; 1559, 1597; 1664; 2959; 3309; 3621. <sup>1</sup>H NMR (DMSO-*d*<sub>6</sub>, 399.93 MHz), δ, ppm: 1.04 (t, 3H, OCH<sub>2</sub>CH<sub>3</sub>, <sup>3</sup>J<sub>HH</sub> = 7.0), 1.11 (t, 3H, OCH<sub>2</sub>CH<sub>3</sub>, <sup>3</sup>J<sub>HH</sub> = 7.0), 1.35 [s, 18H, C(CH<sub>3</sub>)<sub>3</sub>], 2.21 (s, 3H, NHC<sub>6</sub>H<sub>4</sub>CH<sub>3</sub>), 2.29 (s, 3H, NHC<sub>6</sub>H<sub>4</sub>CH<sub>3</sub>), 3.80 - 4.00 (m, 4H, OCH<sub>2</sub>CH<sub>3</sub>), 4.84 (d, 1H, CHP, <sup>2</sup>J<sub>PH</sub> = 26.9), 6.82 (d, 1H, NHC<sub>6</sub>H<sub>4</sub>CH<sub>3</sub>, <sup>3</sup>J<sub>HH</sub> = 7.3), 6.86 (d, 2H, NHC<sub>6</sub>H<sub>4</sub>CH<sub>3</sub>, <sup>3</sup>J<sub>HH</sub> = 7.3), 6.89 (d, 1H, C<sub>py</sub>, <sup>3</sup>J<sub>HH</sub> = 8.5), 6.93 (s, 1H, OH), 7.12 (t, 1H, NHC<sub>6</sub>H<sub>4</sub>CH<sub>3</sub>, <sup>3</sup>J<sub>HH</sub> = 7.8), 7.19 (t, 1H, NHC<sub>6</sub>H<sub>4</sub>CH<sub>3</sub>, <sup>3</sup>J<sub>HH</sub> = 7.6), 7.33 (s, 2H, CHCC(CH<sub>3</sub>)<sub>3</sub>), 7.40 (s, 1H, NHC<sub>6</sub>H<sub>4</sub>CH<sub>3</sub>), 7.40 (d, 1H, NHC<sub>6</sub>H<sub>4</sub>CH<sub>3</sub>, <sup>3</sup>J<sub>HH</sub> = 5.8), 7.46 (s, 1H, NHC<sub>6</sub>H<sub>4</sub>CH<sub>3</sub>), 7.52 (d, 1H, NHC<sub>6</sub>H<sub>4</sub>CH<sub>3</sub>, <sup>3</sup>J<sub>HH</sub> = 8.3), 8.02 (dd, 1H, CH<sub>py</sub>, <sup>3</sup>J<sub>HH</sub> 8.3, <sup>4</sup>J<sub>PH</sub> = 1.7), 8.95 (s, 1H, NH), 9.50 (s, 1H, NH), 9.72 (s, 1H, NH), 10.57 (s, 1H, NH). <sup>13</sup>C{<sup>1</sup>H} NMR (DMSO-*d*<sub>6</sub>, 150.92 MHz), δ, ppm: 16.46 (d, OCH<sub>2</sub>CH<sub>3</sub>, <sup>3</sup>J<sub>PC</sub> = 4.5), 16.61 (d, OCH<sub>2</sub>CH<sub>3</sub>, <sup>3</sup>J<sub>PC</sub> = 4.5), 21.56 (CH<sub>3</sub>), 21.71 (CH<sub>3</sub>), 30.84 [C(CH<sub>3</sub>)<sub>3</sub>], 35.11 [C(CH<sub>3</sub>)<sub>3</sub>], 42.42 (d, CHP, <sup>1</sup>J<sub>PC</sub> = 138.9), 62.45 (d, OCH<sub>2</sub>CH<sub>3</sub>, <sup>2</sup>J<sub>PC</sub> = 6.1), 62.84 (d, OCH<sub>2</sub>CH<sub>3</sub>, <sup>2</sup>J<sub>PC</sub> = 6.1), 106.03 (CH<sub>py</sub>); 114.74 (C<sub>py</sub>), 116.82 (NHC<sub>6</sub>H<sub>4</sub>CH<sub>3</sub>), 117.33 (NHC<sub>6</sub>H<sub>4</sub>CH<sub>3</sub>), 120.13 (NHC<sub>6</sub>H<sub>4</sub>CH<sub>3</sub>), 120.64 (NHC<sub>6</sub>H<sub>4</sub>CH<sub>3</sub>), 123.66 (NHC<sub>6</sub>H<sub>4</sub>CH<sub>3</sub>), 123.70 (NHC<sub>6</sub>H<sub>4</sub>CH<sub>3</sub>), 126.16 [CHCC(CH<sub>3</sub>)<sub>2</sub>], 126.20 [CHCC(CH<sub>3</sub>)<sub>2</sub>], 127.04 (d, CCHP, <sup>2</sup>J<sub>PC</sub> = 3.0), 128.73 (NHC<sub>6</sub>H<sub>4</sub>CH<sub>3</sub>), 129.02 (NHC<sub>6</sub>H<sub>4</sub>CH<sub>3</sub>), 138.13 (NHC<sub>6</sub>H<sub>4</sub>CH<sub>3</sub>), 138.37 (NHC<sub>6</sub>H<sub>4</sub>CH<sub>3</sub>), 139.64 [C<sub>6</sub>(CH<sub>3</sub>)<sub>3</sub>], 139.68 (NHC<sub>6</sub>H<sub>4</sub>CH<sub>3</sub>), 139.73 (NHC<sub>6</sub>H<sub>4</sub>CH<sub>3</sub>), 141.25 (CH<sub>py</sub>), 147.92 (d, C<sub>py</sub>, <sup>3</sup>J<sub>PC</sub> = 10.1), 150.10 (C<sub>py</sub>), 152.17 (C=O), 152.49 (C=O), 153.44 (COH). <sup>31</sup>P NMR (DMSO-*d*<sub>6</sub>, 161.90 MHz), δ, ppm: 26.91. Anal. Calcd for C<sub>40</sub>H<sub>52</sub>N<sub>5</sub>O<sub>6</sub>P (%): C, 65.83; H, 7.18; N, 9.60; P, 4.24. Found (%): C, 65.85; H, 7.17; N, 9.61; P, 4.26. HRMS (MALDI-TOF) m/z for C<sub>40</sub>H<sub>52</sub>N<sub>5</sub>O<sub>6</sub>P: calc. 729.4 [M]<sup>+</sup>, found 730.5 [M+H]<sup>+</sup>, 768.5 [M+K]<sup>+</sup>.

**Diisopropyl ((2,6-bis(3-(*m*-tolyl)ureido)pyridin-3-yl)(3,5-di-*tert*-butyl-4-hydroxyphenyl)methyl)phosphonate 8c.** White solid, yield 52%, M.p.: 205-206°C. IR (KBr), ν, cm<sup>-1</sup>: 779; 997; 1201; 1555, 1609; 1671; 2960; 3301; 3631. <sup>1</sup>H NMR (DMSO-*d*<sub>6</sub>, 399.93 MHz), δ, ppm: 0.81 (d, 3H, CH(CH<sub>3</sub>)<sub>2</sub>, <sup>3</sup>J<sub>HH</sub> = 6.2), 1.00 (d, 3H, CH(CH<sub>3</sub>)<sub>2</sub>, <sup>3</sup>J<sub>HH</sub> = 6.2), 1.19 (d, 6H, CH(CH<sub>3</sub>)<sub>2</sub>, <sup>3</sup>J<sub>HH</sub> = 6.2), 1.35 [s, 18H, C(CH<sub>3</sub>)<sub>3</sub>], 2.21 (s, 3H, NHC<sub>6</sub>H<sub>4</sub>CH<sub>3</sub>), 2.29 (s, 3H, NHC<sub>6</sub>H<sub>4</sub>CH<sub>3</sub>), 4.41 (m, 1H, CH(CH<sub>3</sub>)<sub>2</sub>), 4.52 (m, 1H, CH(CH<sub>3</sub>)<sub>2</sub>), 4.73 (d, 1H, CHP, <sup>2</sup>J<sub>PH</sub> = 26.9), 6.81 (d, 1H, CH<sub>py</sub>, <sup>3</sup>J<sub>HH</sub> = 7.5), 6.85 (d, 2H, NHC<sub>6</sub>H<sub>4</sub>CH<sub>3</sub>, <sup>3</sup>J<sub>HH</sub> = 8.0), 6.90 (s, 1H, OH), 6.93 (s, 1H, OH), 7.12 (t, 1H, NHC<sub>6</sub>H<sub>4</sub>CH<sub>3</sub>, <sup>3</sup>J<sub>HH</sub> = 7.8), 7.19 (t, 1H, NHC<sub>6</sub>H<sub>4</sub>CH<sub>3</sub>, <sup>3</sup>J<sub>HH</sub> = 8.1), 7.37 (s, 2H, CHCC(CH<sub>3</sub>)<sub>3</sub>), 7.39 (s, 1H, NHC<sub>6</sub>H<sub>4</sub>CH<sub>3</sub>), 7.40 (d, 1H, NHC<sub>6</sub>H<sub>4</sub>CH<sub>3</sub>, <sup>3</sup>J<sub>HH</sub> = 6.4), 7.47 (s, 1H, NHC<sub>6</sub>H<sub>4</sub>CH<sub>3</sub>), 7.54 (d, 1H, NHC<sub>6</sub>H<sub>4</sub>CH<sub>3</sub>, <sup>3</sup>J<sub>HH</sub> = 8.2), 8.07 (d, 1H, CH<sub>py</sub>, <sup>3</sup>J<sub>HH</sub> = 8.2), 8.98 (s, 1H, NH), 9.51 (s, 1H, NH), 9.67 (s, 1H, NH), 10.67 (s, 1H, NH). <sup>13</sup>C{<sup>1</sup>H} NMR (DMSO-*d*<sub>6</sub>, 125.76 MHz), δ, ppm: 21.69 (CH<sub>3</sub>), 23.23 [d, OCH(CH<sub>3</sub>)<sub>2</sub>, <sup>3</sup>J<sub>PC</sub> = 5.0], 23.74 [d, OCH(CH<sub>3</sub>)<sub>2</sub>, <sup>3</sup>J<sub>PC</sub> = 5.0], 24.21 [OCH(CH<sub>3</sub>)<sub>2</sub>], 24.49 [OCH(CH<sub>3</sub>)<sub>2</sub>], 30.79 [C(CH<sub>3</sub>)<sub>3</sub>]; 35.08 [C(CH<sub>3</sub>)<sub>3</sub>], 42.44 (d, CHP, <sup>1</sup>J<sub>PC</sub> = 142.38), 70.71 (d, OCH<sub>2</sub>CH<sub>3</sub>, <sup>2</sup>J<sub>PC</sub> = 7.6), 71.39 (d, OCH<sub>2</sub>CH<sub>3</sub>, <sup>2</sup>J<sub>PC</sub> = 7.6), 105.6 (CH<sub>py</sub>); 114.97 (C<sub>py</sub>), 116.68 (NHC<sub>6</sub>H<sub>4</sub>CH<sub>3</sub>), 117.39 (NHC<sub>6</sub>H<sub>4</sub>CH<sub>3</sub>), 119.99 (NHC<sub>6</sub>H<sub>4</sub>CH<sub>3</sub>), 120.71 (NHC<sub>6</sub>H<sub>4</sub>CH<sub>3</sub>), 123.63 (NHC<sub>6</sub>H<sub>4</sub>CH<sub>3</sub>), 123.64 (NHC<sub>6</sub>H<sub>4</sub>CH<sub>3</sub>), 126.26 [CHCC(CH<sub>3</sub>)<sub>2</sub>], 126.33 [CHCC(CH<sub>3</sub>)<sub>2</sub>], 127.17 (d, CCHP, <sup>2</sup>J<sub>PC</sub> = 2.5), 128.67 (NHC<sub>6</sub>H<sub>4</sub>CH<sub>3</sub>), 129.02 (NHC<sub>6</sub>H<sub>4</sub>CH<sub>3</sub>), 138.07 (NHC<sub>6</sub>H<sub>4</sub>CH<sub>3</sub>), 138.37 (NHC<sub>6</sub>H<sub>4</sub>CH<sub>3</sub>), 139.59 [C<sub>6</sub>(CH<sub>3</sub>)<sub>3</sub>], 139.68 (NHC<sub>6</sub>H<sub>4</sub>CH<sub>3</sub>), 139.71 (NHC<sub>6</sub>H<sub>4</sub>CH<sub>3</sub>), 140.97 (d, CH<sub>py</sub>, <sup>3</sup>J<sub>PC</sub> = 7.6), 147.78 (C<sub>py</sub>), 149.97 (C<sub>py</sub>), 152.05 (C=O), 152.51 (C=O),

153.39 (COH). <sup>31</sup>P NMR (DMSO-*d*<sub>6</sub>, 161.90 MHz), δ, ppm: 24.39. Anal. Calcd for C<sub>42</sub>H<sub>56</sub>N<sub>5</sub>O<sub>6</sub>P (%): C, 66.56; H, 7.45; N, 9.24; P, 4.09. Found (%): C, 66.58; H, 7.47; N, 9.26; P, 4.10. HRMS (MALDI-TOF) m/z for C<sub>42</sub>H<sub>56</sub>N<sub>5</sub>O<sub>6</sub>P: calc. 757.4 [M]<sup>+</sup>, found 758.7 [M+H]<sup>+</sup>; 780.8 [M+Na]<sup>+</sup>, 796.7 [M+K]<sup>+</sup>.

**Diphenyl((2,6-bis(3-(*m*-tolyl)ureido)pyridin-3-yl)(3,5-di-*tert*-butyl-4-hydroxyphenyl)methyl)phosphonate 8d.** White solid, yield 60%, M.p.: 208-209°C. IR (KBr), ν, cm<sup>-1</sup>: 771; 1161; 1207; 1558, 1595; 1664; 2924; 3351; 3624. <sup>1</sup>H NMR (DMSO-*d*<sub>6</sub>, 399.93 MHz), δ, ppm: 1.32 [s, 18H, C(CH<sub>3</sub>)<sub>3</sub>], 2.22 (s, 3H, CH<sub>3</sub>), 2.29 (s, 3H, CH<sub>3</sub>), 5.44 (d, 1H, CHP, <sup>2</sup>J<sub>PH</sub> = 28.0), 6.79 (d, 1H, CH<sub>py</sub>, <sup>3</sup>J<sub>HH</sub> = 8.4), 6.82 (d, 1H, NHC<sub>6</sub>H<sub>4</sub>CH<sub>3</sub>, <sup>3</sup>J<sub>HH</sub> = 7.5), 6.84 (d, 1H, NHC<sub>6</sub>H<sub>4</sub>CH<sub>3</sub>, <sup>3</sup>J<sub>HH</sub> = 7.5), 6.68 (d, 2H, OC<sub>6</sub>H<sub>5</sub>, <sup>3</sup>J<sub>HH</sub> = 8.0), 7.01 (s, 1H, OH), 7.01 (t, 2H, OC<sub>6</sub>H<sub>5</sub>, <sup>3</sup>J<sub>HH</sub> = 7.6), 7.10-7.30 (m, 6H, OC<sub>6</sub>H<sub>5</sub>, NHC<sub>6</sub>H<sub>4</sub>CH<sub>3</sub>), 7.32 (t, 2H, OC<sub>6</sub>H<sub>5</sub>, <sup>3</sup>J<sub>HH</sub> = 7.8), 7.34 (s, 1H, NHC<sub>6</sub>H<sub>4</sub>CH<sub>3</sub>), 7.41 (s, 1H, NHC<sub>6</sub>H<sub>4</sub>CH<sub>3</sub>), 7.43 (s, 2H, CHCC(CH<sub>3</sub>)<sub>3</sub>), 7.46 (d, 1H, NHC<sub>6</sub>H<sub>4</sub>CH<sub>3</sub>, <sup>3</sup>J<sub>HH</sub> = 8.0), 7.52 (d, 1H, NHC<sub>6</sub>H<sub>4</sub>CH<sub>3</sub>, <sup>3</sup>J<sub>HH</sub> = 8.0), 8.17 (d, 1H, CH<sub>py</sub>, <sup>3</sup>J<sub>HH</sub> = 8.5), 9.09 (s, 1H, NH), 9.56 (s, 1H, NH), 9.74 (s, 1H, NH), 10.52 (s, 1H, NH). <sup>13</sup>C{<sup>1</sup>H} NMR (DMSO-*d*<sub>6</sub>, 100.57 MHz), δ, ppm: 22.07 (CH<sub>3</sub>), 22.22 (CH<sub>3</sub>), 31.22 [C(CH<sub>3</sub>)<sub>3</sub>], 35.61 [C(CH<sub>3</sub>)<sub>3</sub>], 43.35 (d, CHP, <sup>1</sup>J<sub>PC</sub> = 139.4), 106.85 (CH<sub>py</sub>); 114.10 (C<sub>py</sub>), 117.43 (NHC<sub>6</sub>H<sub>4</sub>CH<sub>3</sub>), 117.82 (NHC<sub>6</sub>H<sub>4</sub>CH<sub>3</sub>), 120.74 (NHC<sub>6</sub>H<sub>4</sub>CH<sub>3</sub>), 121.14 (NHC<sub>6</sub>H<sub>4</sub>CH<sub>3</sub>), 121.14 (d, OC<sub>6</sub>H<sub>5</sub>, <sup>3</sup>J<sub>PC</sub> = 3.0), 121.31 (d, OC<sub>6</sub>H<sub>5</sub>, <sup>3</sup>J<sub>PC</sub> = 3.0), 124.24 (NHC<sub>6</sub>H<sub>4</sub>CH<sub>3</sub>), 124.31 (NHC<sub>6</sub>H<sub>5</sub>CH<sub>3</sub>), 126.00 (d, CCHP, <sup>2</sup>J<sub>PC</sub> = 5.1), 126.02 (OC<sub>6</sub>H<sub>5</sub>), 126.26 (OC<sub>6</sub>H<sub>5</sub>), 127.04 [CHCC(CH<sub>3</sub>)<sub>3</sub>], 127.11 [CHCC(CH<sub>3</sub>)<sub>3</sub>], 129.54 (NHC<sub>6</sub>H<sub>4</sub>CH<sub>3</sub>), 129.59 (NHC<sub>6</sub>H<sub>4</sub>CH<sub>3</sub>), 129.10 (NHC<sub>6</sub>H<sub>4</sub>CH<sub>3</sub>), 130.51 (OC<sub>6</sub>H<sub>5</sub>), 130.82 (OC<sub>6</sub>H<sub>5</sub>), 138.69 (NHC<sub>6</sub>H<sub>4</sub>CH<sub>3</sub>), 138.91 (NHC<sub>6</sub>H<sub>4</sub>CH<sub>3</sub>), 140.10 (NHC<sub>6</sub>H<sub>4</sub>CH<sub>3</sub>), 140.18 (NHC<sub>6</sub>H<sub>4</sub>CH<sub>3</sub>), 140.47 [CC(CH<sub>3</sub>)<sub>3</sub>], 141.60 (d, CH<sub>py</sub>, <sup>3</sup>J<sub>PC</sub> = 3.0), 147.62 (d, C<sub>py</sub>, <sup>3</sup>J<sub>PC</sub> = 12.12), 150.96 (d, OC<sub>6</sub>H<sub>5</sub>, <sup>2</sup>J<sub>PC</sub> = 11.1), 151.01 (C<sub>py</sub>), 151.22 (d, OC<sub>6</sub>H<sub>5</sub>, <sup>2</sup>J<sub>PC</sub> = 10.1), 152.81 (C=O), 152.96 (C=O), 154.49 (COH). <sup>31</sup>P NMR (DMSO-*d*<sub>6</sub>, 161.90 MHz), δ, ppm: 19.29. Anal. Calcd for C<sub>48</sub>H<sub>52</sub>N<sub>5</sub>O<sub>6</sub>P (%): C, 69.80; H, 6.35; N, 8.48; P, 3.75. Found (%): C, 69.82; H, 6.37; N, 8.49; P, 3.76. HRMS (MALDI-TOF) m/z for C<sub>48</sub>H<sub>52</sub>N<sub>5</sub>O<sub>6</sub>P: calc. 825.4 [M]<sup>+</sup>, found 826.3 [M+H]<sup>+</sup>; 848.2 [M+Na]<sup>+</sup>, 864.2 [M+K]<sup>+</sup>.

**Dimethyl((2,6-bis(3-(*p*-tolyl)ureido)pyridin-3-yl)(3,5-di-*tert*-butyl-4-hydroxyphenyl)methyl)phosphonate 9a.** White solid, yield 60%, M.p.: 217-218°C. IR (KBr), ν, cm<sup>-1</sup>: 795; 1028; 1055; 1239; 1595, 1656; 1706; 3363; 3539. <sup>1</sup>H NMR (DMSO-*d*<sub>6</sub>, 399.93 MHz), δ, ppm: 1.34 [s, 18H, C(CH<sub>3</sub>)<sub>3</sub>], 2.25 (s, 3H, CH<sub>3</sub>), 2.28 (s, 3H, CH<sub>3</sub>), 3.54 (d, 3H, OCH<sub>3</sub>, <sup>3</sup>J<sub>PH</sub> = 10.8), 3.57 (d, 3H, OCH<sub>3</sub>, <sup>3</sup>J<sub>PH</sub> = 7.2), 3.72 (s, 3H, OCH<sub>3</sub>), 4.92 (d, 1H, CHP, <sup>2</sup>J<sub>PH</sub> = 26.9), 6.92 (d, 1H, CH<sub>py</sub>, <sup>3</sup>J<sub>HH</sub> = 8.6), 6.94 (s, 1H, OH), 7.05 (d, 2H, NHC<sub>6</sub>H<sub>4</sub>CH<sub>3</sub>, <sup>3</sup>J<sub>HH</sub> = 8.1), 7.13 (d, 2H, NHC<sub>6</sub>H<sub>4</sub>CH<sub>3</sub>, <sup>3</sup>J<sub>HH</sub> = 8.0), 7.31 (s, 2H, CHCC(CH<sub>3</sub>)<sub>3</sub>), 7.47 (d, 2H, NHC<sub>6</sub>H<sub>4</sub>CH<sub>3</sub>, <sup>3</sup>J<sub>HH</sub> = 7.9), 7.55 (d, 2H, NHC<sub>6</sub>H<sub>4</sub>CH<sub>3</sub>, <sup>3</sup>J<sub>HH</sub> = 8.0), 8.01 (d, 1H, CH<sub>py</sub>, <sup>3</sup>J<sub>HH</sub> = 8.6), 8.93 (s, 1H, NH), 9.44 (s, 1H, NH), 9.78 (s, 1H, NH), 10.39 (s, 1H, NH). <sup>13</sup>C{<sup>1</sup>H} NMR (DMSO-*d*<sub>6</sub>, 150.92 MHz), δ, ppm: 20.87 (CH<sub>3</sub>), 30.86 [C(CH<sub>3</sub>)<sub>3</sub>], 35.12 [C(CH<sub>3</sub>)<sub>3</sub>], 41.73 (d, CHP, <sup>1</sup>J<sub>PC</sub> = 139.9), 53.42 (d, POCH<sub>3</sub>, <sup>2</sup>J<sub>PC</sub> = 6.0), 53.74 (d, POCH<sub>3</sub>, <sup>2</sup>J<sub>PC</sub> = 6.0), 106.06 (CH<sub>py</sub>); 114.47 (C<sub>py</sub>), 119.83 (NHC<sub>6</sub>H<sub>4</sub>CH<sub>3</sub>), 120.08 (NHC<sub>6</sub>H<sub>4</sub>CH<sub>3</sub>), 126.03 [CHCC(CH<sub>3</sub>)<sub>2</sub>], 126.06 [CHCC(CH<sub>3</sub>)<sub>2</sub>], 126.89 (CCHP), 129.37 (NHC<sub>6</sub>H<sub>4</sub>CH<sub>3</sub>), 129.60 (NHC<sub>6</sub>H<sub>4</sub>CH<sub>3</sub>), 131.79 (NHC<sub>6</sub>H<sub>4</sub>CH<sub>3</sub>), 131.96 (NHC<sub>6</sub>H<sub>4</sub>CH<sub>3</sub>), 137.12 (NHC<sub>6</sub>H<sub>4</sub>CH<sub>3</sub>), 137.23 (NHC<sub>6</sub>H<sub>4</sub>CH<sub>3</sub>), 139.71 [CC(CH<sub>3</sub>)<sub>3</sub>], 141.30 (CH<sub>py</sub>), 148.02 (d, C<sub>py</sub>, <sup>3</sup>J<sub>PC</sub> = 10.6), 150.18 (C<sub>py</sub>), 152.32 (C=O), 152.49 (C=O), 153.51 (COH). <sup>31</sup>P NMR (DMSO-*d*<sub>6</sub>, 161.90 MHz), δ, ppm: 28.59. Anal. Calcd for C<sub>38</sub>H<sub>48</sub>N<sub>5</sub>O<sub>6</sub>P (%): C, 65.03; H, 6.89; N, 9.98; P, 4.41. Found (%): C, 65.04; H, 6.90; N, 10.00; P, 4.43. HRMS (MALDI-TOF) m/z for C<sub>38</sub>H<sub>48</sub>N<sub>5</sub>O<sub>6</sub>P: calc. 701.3 [M]<sup>+</sup>, found: 702.6 [M+H]<sup>+</sup>; 724.6 [M+Na]<sup>+</sup>, 740.7 [M+K]<sup>+</sup>.

**Diethyl((2,6-bis(3-(*p*-tolyl)ureido)pyridin-3-yl)(3,5-di-*tert*-butyl-4-hydroxyphenyl)methyl)phosphonate 9b.** White solid, yield 71%, M.p.: 229-230°C. IR (KBr), ν, cm<sup>-1</sup>: 815; 1100; 1224; 1548; 1603, 1642; 2960; 3325; 3620. <sup>1</sup>H NMR (DMSO-*d*<sub>6</sub>, 600.13 MHz), δ, ppm: 1.03 (t, 3H, OCH<sub>2</sub>CH<sub>3</sub>, <sup>3</sup>J<sub>HH</sub> = 7.0), 1.10 (t, 3H, OCH<sub>2</sub>CH<sub>3</sub>, <sup>3</sup>J<sub>HH</sub> = 7.0), 1.35 [s, 18H, CH(CH<sub>3</sub>)<sub>2</sub>], 2.25

(s, 3H, CH<sub>3</sub>), 2.28 (s, 3H, CH<sub>3</sub>), 3.83 (m, 1H, OCH<sub>2</sub>CH<sub>3</sub>), 3.94 (m, 3H, OCH<sub>2</sub>CH<sub>3</sub>), 4.84 (d, 1H, CHP, <sup>2</sup>J<sub>PH</sub> = 26.7), 6.90 (s, 1H, OH), 6.91 (d, 1H, CH<sub>py</sub>, <sup>3</sup>J<sub>HH</sub> = 6.0), 7.05 (d, 2H, NHC<sub>6</sub>H<sub>4</sub>CH<sub>3</sub>, <sup>3</sup>J<sub>HH</sub> = 8.0), 7.13 (d, 2H, NHC<sub>6</sub>H<sub>4</sub>CH<sub>3</sub>, <sup>3</sup>J<sub>HH</sub> = 8.0), 7.32 (s, 2H, CHCC(CH<sub>3</sub>)<sub>3</sub>), 7.47 (d, 2H, NHC<sub>6</sub>H<sub>4</sub>CH<sub>3</sub>, <sup>3</sup>J<sub>HH</sub> = 8.0), 7.55 (d, 2H, NHC<sub>6</sub>H<sub>4</sub>CH<sub>3</sub>, <sup>3</sup>J<sub>HH</sub> = 8.1), 8.00 (d, 1H, CH<sub>py</sub>, <sup>3</sup>J<sub>HH</sub> = 8.5), 8.92 (s, 1H, NH), 9.43 (s, 1H, NH), 9.75 (s, 1H, NH), 10.43 (s, 1H, NH). <sup>13</sup>C{<sup>1</sup>H} NMR (DMSO-*d*<sub>6</sub>, 150.92 MHz), δ, ppm: 16.46 (d, OCH<sub>2</sub>CH<sub>3</sub>, <sup>3</sup>J<sub>PC</sub> = 4.6), 16.61 (d, OCH<sub>2</sub>CH<sub>3</sub>, <sup>3</sup>J<sub>PC</sub> = 4.6), 20.87 (CH<sub>3</sub>), 30.84 [C(CH<sub>3</sub>)<sub>3</sub>], 35.10 [C(CH<sub>3</sub>)<sub>3</sub>], 42.38 (d, CHP, <sup>1</sup>J<sub>PC</sub> = 138.9), 62.43 (d, OCH<sub>2</sub>CH<sub>3</sub>, <sup>2</sup>J<sub>PC</sub> = 6.1), 62.82 (d, OCH<sub>2</sub>CH<sub>3</sub>, <sup>2</sup>J<sub>PC</sub> = 6.1), 105.90 (CH<sub>py</sub>); 114.61 (C<sub>py</sub>), 119.75 (NHC<sub>6</sub>H<sub>4</sub>CH<sub>3</sub>), 120.10 (NHC<sub>6</sub>H<sub>4</sub>CH<sub>3</sub>), 126.15 [CHCC(CH<sub>3</sub>)<sub>2</sub>], 126.20 [CHCC(CH<sub>3</sub>)<sub>2</sub>], 127.04 (d, CCHP, <sup>2</sup>J<sub>PC</sub> = 3.0), 129.35 (NHC<sub>6</sub>H<sub>4</sub>CH<sub>3</sub>), 129.61 (NHC<sub>6</sub>H<sub>4</sub>CH<sub>3</sub>), 131.78 (NHC<sub>6</sub>H<sub>4</sub>CH<sub>3</sub>), 131.93 (NHC<sub>6</sub>H<sub>4</sub>CH<sub>3</sub>), 137.11 (NHC<sub>6</sub>H<sub>4</sub>CH<sub>3</sub>), 137.23 (NHC<sub>6</sub>H<sub>4</sub>CH<sub>3</sub>), 139.63 [CC(CH<sub>3</sub>)<sub>3</sub>], 141.24 (CH<sub>py</sub>), 148.01 (d, C<sub>py</sub>, <sup>3</sup>J<sub>PC</sub> = 10.1), 150.07 (C<sub>py</sub>), 152.23 (C=O), 152.49 (C=O), 153.42 (COH). <sup>31</sup>P NMR (DMSO-*d*<sub>6</sub>, 242.94 MHz), δ, ppm: 25.93. Anal. Calcd for C<sub>40</sub>H<sub>52</sub>N<sub>5</sub>O<sub>6</sub>P (%): C, 65.83; H, 7.18; N, 9.60; P, 4.24. Found (%): C, 65.84; H, 7.19; N, 9.62; P, 4.25. HRMS (MALDI-TOF) m/z for C<sub>40</sub>H<sub>52</sub>N<sub>5</sub>O<sub>6</sub>P: calc. 729.4 [M]<sup>+</sup>, found: 730.8 [M+H]<sup>+</sup>; 752.8 [M+Na]<sup>+</sup>, 768.8 [M+K]<sup>+</sup>.

**Diisopropyl((2,6-bis(3-(*p*-tolyl)ureido)pyridin-3-yl)(3,5-di-*tert*-butyl-4-hydroxyphenyl)methyl)phosphonate 9c.** White solid, yield 55%, M.p.: 201-202°C. IR (KBr), ν, cm<sup>-1</sup>: 815; 1100; 1236; 1599; 1671, 1726; 2974; 3307; 3633. <sup>1</sup>H NMR (DMSO-*d*<sub>6</sub>, 600.13 MHz), δ, ppm: 0.82 [d, 3H, OCH(CH<sub>3</sub>)<sub>2</sub>, <sup>3</sup>J<sub>HH</sub> = 12], 1.01 [d, 3H, CH(CH<sub>3</sub>)<sub>2</sub>, <sup>3</sup>J<sub>HH</sub> = 6], 1.19 [d, 6H, OCH(CH<sub>3</sub>)<sub>2</sub>, <sup>3</sup>J<sub>HH</sub> = 12], 1.35 [s, 18H, C(CH<sub>3</sub>)<sub>3</sub>], 2.26 (d, 3H, C<sub>6</sub>H<sub>4</sub>CH<sub>3</sub>), 2.29 (d, 3H, C<sub>6</sub>H<sub>4</sub>CH<sub>3</sub>), 4.42 [m, 1H, OCH(CH<sub>3</sub>)<sub>2</sub>], 4.52 [m, 1H, OCH(CH<sub>3</sub>)<sub>2</sub>], 4.74 (d, 1H, CHP, <sup>2</sup>J<sub>PH</sub> = 27.0), 6.88 (s, 1H, OH), 6.89 (d, 2H, CH<sub>py</sub>, <sup>3</sup>J<sub>HH</sub> = 9.0), 7.06 (d, 2H, NHC<sub>6</sub>H<sub>4</sub>CH<sub>3</sub>, <sup>3</sup>J<sub>HH</sub> = 8.1), 7.15 (d, 2H, NHC<sub>6</sub>H<sub>4</sub>CH<sub>3</sub>, <sup>3</sup>J<sub>HH</sub> = 8.1), 7.37 (s, 2H, CHCC(CH<sub>3</sub>)<sub>3</sub>), 7.48 (d, 2H, NHC<sub>6</sub>H<sub>4</sub>CH<sub>3</sub>, <sup>3</sup>J<sub>HH</sub> = 12), 7.58 (d, 2H, NHC<sub>6</sub>H<sub>4</sub>CH<sub>3</sub>, <sup>3</sup>J<sub>HH</sub> = 8.1), 8.06 (d, 1H, CH<sub>py</sub>, <sup>3</sup>J<sub>HH</sub> = 12), 8.96 (s, 1H, NH), 9.43 (s, 1H, NH), 9.72 (s, 1H, NH), 10.53 (s, 1H, NH). <sup>13</sup>C{<sup>1</sup>H} NMR (DMSO-*d*<sub>6</sub>, 150.92 MHz), δ, ppm: 20.87 (CH<sub>3</sub>), 23.27 [d, OCH(CH<sub>3</sub>)<sub>2</sub>, <sup>3</sup>J<sub>PC</sub> = 4.5], 23.76 [d, OCH(CH<sub>3</sub>)<sub>2</sub>, <sup>3</sup>J<sub>PC</sub> = 4.5], 24.24 [OCH(CH<sub>3</sub>)<sub>2</sub>], 24.50 [OCH(CH<sub>3</sub>)<sub>2</sub>], 30.82 [C(CH<sub>3</sub>)<sub>3</sub>]; 35.10 [C(CH<sub>3</sub>)<sub>3</sub>], 42.03 (d, CHP, <sup>1</sup>J<sub>PC</sub> = 140.4), 70.74 (d, OCH(CH<sub>3</sub>)<sub>2</sub>, <sup>2</sup>J<sub>PC</sub> = 7.6), 71.40 (d, OCH(CH<sub>3</sub>)<sub>2</sub>, <sup>2</sup>J<sub>PC</sub> = 7.6), 105.75 (CH<sub>py</sub>); 114.88 (C<sub>py</sub>), 119.66 (NHC<sub>6</sub>H<sub>4</sub>CH<sub>3</sub>), 120.19 (NHC<sub>6</sub>H<sub>4</sub>CH<sub>3</sub>), 126.32 [CHCC(CH<sub>3</sub>)<sub>2</sub>], 126.36 [CHCC(CH<sub>3</sub>)<sub>2</sub>], 127.22 (CCHP), 129.32 (NHC<sub>6</sub>H<sub>4</sub>CH<sub>3</sub>), 129.63 (NHC<sub>6</sub>H<sub>4</sub>CH<sub>3</sub>), 137.16 (NHC<sub>6</sub>H<sub>4</sub>CH<sub>3</sub>), 137.26 (NHC<sub>6</sub>H<sub>4</sub>CH<sub>3</sub>), 139.60 [CC(CH<sub>3</sub>)<sub>3</sub>], 140.99 (CH<sub>py</sub>), 147.98 (d, C<sub>py</sub>, <sup>3</sup>J<sub>PC</sub> = 9.1), 150.02 (C<sub>py</sub>), 152.16 (C=O), 152.54 (C=O), 153.40 (COH). <sup>31</sup>P NMR (DMSO-*d*<sub>6</sub>, 242.94 MHz), δ, ppm: 25.49. Anal. Calcd for C<sub>42</sub>H<sub>56</sub>N<sub>5</sub>O<sub>6</sub>P (%): C, 66.56; H, 7.45; N, 9.24; P, 4.09. Found (%): C, 66.57; H, 7.47; N, 9.27; P, 4.11. HRMS (MALDI-TOF) m/z for C<sub>42</sub>H<sub>56</sub>N<sub>5</sub>O<sub>6</sub>P: calc. 757.4 [M]<sup>+</sup>, found: 758.7 [M+H]<sup>+</sup>; 780.6 [M+Na]<sup>+</sup>, 802.6 [M+K]<sup>+</sup>.

**Diphenyl((2,6-bis(3-(*p*-tolyl)ureido)pyridin-3-yl)(3,5-di-*tert*-butyl-4-hydroxyphenyl)methyl)phosphonate 9d.** White solid, yield 68%, M.p.: 208-209°C. IR (KBr), ν, cm<sup>-1</sup>: 762; 1163; 1207; 1548; 1596, 1727; 2956; 3301; 3631. <sup>1</sup>H NMR (DMSO-*d*<sub>6</sub>, 399.93 MHz), δ, ppm: 1.32 [s, 18H, C(CH<sub>3</sub>)<sub>3</sub>], 2.26 (s, 3H, CH<sub>3</sub>), 2.29 (s, 3H, CH<sub>3</sub>), 5.44 (d, 1H, CHP, <sup>2</sup>J<sub>PH</sub> = 28.2), 6.68 (d, 2H, NHC<sub>6</sub>H<sub>4</sub>OCH<sub>3</sub>, <sup>3</sup>J<sub>HH</sub> = 8.0), 7.00 (m, 4H, NHC<sub>6</sub>H<sub>4</sub>OCH<sub>3</sub>, CH<sub>py</sub>, OH), 7.05-7.15 (m, 6H, OC<sub>6</sub>H<sub>5</sub>), 7.22 (t, 2H, OC<sub>6</sub>H<sub>5</sub>, <sup>3</sup>J<sub>HH</sub> = 7.8), 7.32 (t, 2H, OC<sub>6</sub>H<sub>5</sub>, <sup>3</sup>J<sub>HH</sub> = 7.8), 7.42 (s, 2H, CHCC(CH<sub>3</sub>)<sub>3</sub>), 7.48 (d, 2H, NHC<sub>6</sub>H<sub>4</sub>CH<sub>3</sub>, <sup>3</sup>J<sub>HH</sub> = 7.4), 7.56 (d, 2H, NHC<sub>6</sub>H<sub>4</sub>CH<sub>3</sub>, <sup>3</sup>J<sub>HH</sub> = 8.2), 8.16 (d, 1H, CH<sub>py</sub>, <sup>3</sup>J<sub>HH</sub> = 8.0), 9.05 (s, 1H, NH), 9.49 (s, 1H, NH), 9.77 (s, 1H, NH), 10.39 (s, 1H, NH). <sup>13</sup>C{<sup>1</sup>H} NMR (DMSO-*d*<sub>6</sub>, 100.57 MHz), δ, ppm: 21.32 (CH<sub>3</sub>), 31.21 [C(CH<sub>3</sub>)<sub>3</sub>]; 35.60 [C(CH<sub>3</sub>)<sub>3</sub>], 43.29 (d, CHP, <sup>1</sup>J<sub>PC</sub> = 140.8), 106.70 (CH<sub>py</sub>); 113.90 (C<sub>py</sub>), 120.34 (NHC<sub>6</sub>H<sub>4</sub>CH<sub>3</sub>), 120.57 (NHC<sub>6</sub>H<sub>4</sub>CH<sub>3</sub>), 121.10 (d, OC<sub>6</sub>H<sub>5</sub>, <sup>3</sup>J<sub>PC</sub> = 4.0), 121.28 (d, OC<sub>6</sub>H<sub>5</sub>, <sup>3</sup>J<sub>PC</sub> = 3.0), 126.01 [CHCC(CH<sub>3</sub>)<sub>2</sub>], 126.01 (CCHP), 126.23 [CHCC(CH<sub>3</sub>)<sub>2</sub>], 129.88

(NHC<sub>6</sub>H<sub>4</sub>CH<sub>3</sub>), 130.50 (NHC<sub>6</sub>H<sub>4</sub>CH<sub>3</sub>), 130.80 (OC<sub>6</sub>H<sub>5</sub>), 131.49 (OC<sub>6</sub>H<sub>5</sub>), 132.32 (NHC<sub>6</sub>H<sub>4</sub>CH<sub>3</sub>), 132.51 (NHC<sub>6</sub>H<sub>4</sub>CH<sub>3</sub>), 137.54 (NHC<sub>6</sub>H<sub>4</sub>CH<sub>3</sub>), 137.68 (NHC<sub>6</sub>H<sub>4</sub>CH<sub>3</sub>), 140.43 [C(CH<sub>3</sub>)<sub>3</sub>], 141.57 (d, C<sub>py</sub>, <sup>3</sup>J<sub>PC</sub> = 5.1), 148.71 (d, C<sub>py</sub>, <sup>3</sup>J<sub>PC</sub> = 9.1), 150.92 (d, OC<sub>6</sub>H<sub>5</sub>, <sup>2</sup>J<sub>PC</sub> = 10.1), 150.97 (C<sub>py</sub>), 151.20 (d, OC<sub>6</sub>H<sub>5</sub>, <sup>2</sup>J<sub>PC</sub> = 9.1), 152.83 (C=O), 152.93 (C=O), 153.62 (COH). <sup>31</sup>P NMR (DMSO-*d*<sub>6</sub>, 161.90 MHz), δ, ppm: 19.27. Anal. Calcd for C<sub>48</sub>H<sub>52</sub>N<sub>5</sub>O<sub>6</sub>P (%): C, 69.80; H, 6.35; N, 8.48; P, 3.75. Found (%): C, 69.81; H, 6.36; N, 8.50; P, 3.77. HRMS (MALDI-TOF) m/z for C<sub>48</sub>H<sub>52</sub>N<sub>5</sub>O<sub>6</sub>P: calc. 825.4 [M]<sup>+</sup>, found: 826.9 [M+H]<sup>+</sup>, 848.9 [M+Na]<sup>+</sup>, 864.9 [M+K]<sup>+</sup>.

**Dimethyl((2,6-bis-(3-(4-methoxyphenyl)ureido)pyridin-3-yl)(3,5-di-*tert*-butyl-4-hydroxyphenyl)methyl)phosphonate 10a.** White solid, yield 51%, M.p.: 214-215°C. IR (KBr), ν, cm<sup>-1</sup>: 830; 1026; 1040; 1055; 1238; 1559, 1598; 1707; 2957; 3374; 3575. <sup>1</sup>H NMR (DMSO-*d*<sub>6</sub>, 600.13 MHz), δ, ppm: 1.35 [s, 18H, C(CH<sub>3</sub>)<sub>3</sub>], 3.54 (d, 3H, OCH<sub>3</sub>, <sup>3</sup>J<sub>PH</sub> = 10.8), 3.58 (d, 3H, OCH<sub>3</sub>, <sup>3</sup>J<sub>PH</sub> = 10.8), 3.72 (s, 3H, OCH<sub>3</sub>), 3.74 (s, 3H, OCH<sub>3</sub>), 4.93 (d, 1H, CHP, <sup>2</sup>J<sub>PH</sub> = 26.8), 6.82 (d, 2H, NHC<sub>6</sub>H<sub>4</sub>OCH<sub>3</sub>, <sup>3</sup>J<sub>HH</sub> = 9.0), 6.92 (m, 4H, NHC<sub>6</sub>H<sub>4</sub>OCH<sub>3</sub>, OH, CH<sub>py</sub>), 7.32 (s, 2H, CHCC(CH<sub>3</sub>)<sub>3</sub>), 7.48 (d, 2H, NHC<sub>6</sub>H<sub>4</sub>OCH<sub>3</sub>, <sup>3</sup>J<sub>HH</sub> = 9.0), 7.54 (d, 2H, NHC<sub>6</sub>H<sub>4</sub>OCH<sub>3</sub>, <sup>3</sup>J<sub>HH</sub> = 9.1), 8.00 (d, 1H, CH<sub>py</sub>, <sup>3</sup>J<sub>HH</sub> = 8.5), 8.91 (s, 1H, NH), 9.40 (s, 1H, NH), 9.78 (s, 1H, NH), 10.31 (s, 1H, NH). <sup>13</sup>C{<sup>1</sup>H} NMR (DMSO-*d*<sub>6</sub>, 125.76 MHz), δ, ppm: 30.83 [C(CH<sub>3</sub>)<sub>3</sub>], 35.09 [C(CH<sub>3</sub>)<sub>3</sub>], 41.62 (d, CHP, <sup>1</sup>J<sub>PC</sub> = 139.9), 53.41 (d, POCH<sub>3</sub>, <sup>2</sup>J<sub>PC</sub> = 6.3), 53.72 (d, POCH<sub>3</sub>, <sup>2</sup>J<sub>PC</sub> = 7.6), 55.62 (OCH<sub>3</sub>), 55.69 (OCH<sub>3</sub>), 105.80 (CH<sub>py</sub>); 114.15 (NHC<sub>6</sub>H<sub>4</sub>OCH<sub>3</sub>), 114.25 (d, C<sub>py</sub>, <sup>2</sup>J<sub>PC</sub> = 2.5), 114.39 (NHC<sub>6</sub>H<sub>4</sub>OCH<sub>3</sub>), 121.58 (NHC<sub>6</sub>H<sub>4</sub>OCH<sub>3</sub>), 121.63 (NHC<sub>6</sub>H<sub>4</sub>OCH<sub>3</sub>), 125.99 [(CHCC(CH<sub>3</sub>)<sub>2</sub>), 126.04 [(CHCC(CH<sub>3</sub>)<sub>2</sub>), 126.88 (d, CCHP, <sup>2</sup>J<sub>PC</sub> = 3.8), 132.63 (NHC<sub>6</sub>H<sub>4</sub>OCH<sub>3</sub>), 132.79 (NHC<sub>6</sub>H<sub>4</sub>OCH<sub>3</sub>), 139.67 [C(CH<sub>3</sub>)<sub>3</sub>], 141.28 (d, CH<sub>py</sub>, <sup>3</sup>J<sub>PC</sub> = 5.0), 148.02 (d, C<sub>py</sub>, <sup>3</sup>J<sub>PC</sub> = 12.6), 150.16 (C<sub>py</sub>), 152.47 (C=O), 152.55 (C=O), 153.46 (COH), 155.31 (NHC<sub>6</sub>H<sub>4</sub>OCH<sub>3</sub>), 155.48 (NHC<sub>6</sub>H<sub>4</sub>OCH<sub>3</sub>). <sup>31</sup>P NMR (DMSO-*d*<sub>6</sub>, 242.94 MHz), δ, ppm: 28.63. Anal. Calcd for C<sub>38</sub>H<sub>48</sub>N<sub>5</sub>O<sub>8</sub>P (%): C, 62.20; H, 6.59; N, 9.54; P, 4.22. Found (%): C, 62.21; H, 6.61; N, 9.55; P, 4.25. HRMS (MALDI-TOF) m/z for C<sub>38</sub>H<sub>48</sub>N<sub>5</sub>O<sub>8</sub>P: calc. 733.3 [M]<sup>+</sup>, found: 756.7 [M+Na]<sup>+</sup>, 772.7 [M+K]<sup>+</sup>.

**Diethyl((2,6-bis-(3-(4-methoxyphenyl)ureido)pyridin-3-yl)(3,5-di-*tert*-butyl-4-hydroxyphenyl)methyl)phosphonate 10b.** White solid, yield 46%, M.p.: 214-215°C. IR (KBr), ν, cm<sup>-1</sup>: 829; 1021; 1050; 1228; 1603; 1667, 1721; 2958; 3306; 3598. <sup>1</sup>H NMR (DMSO-*d*<sub>6</sub>, 600.13 MHz), δ, ppm: 1.04 (t, 3H, OCH<sub>2</sub>CH<sub>3</sub>, <sup>3</sup>J<sub>HH</sub> = 7.2), 1.10 (t, 3H, OCH<sub>2</sub>CH<sub>3</sub>, <sup>3</sup>J<sub>HH</sub> = 7.2), 1.35 [s, 18H, CH(CH<sub>3</sub>)<sub>2</sub>], 3.72 (s, 3H, OCH<sub>3</sub>), 3.74 (s, 3H, OCH<sub>3</sub>), 3.83 (m, 1H, OCH<sub>2</sub>CH<sub>3</sub>), 3.94 (m, 3H, OCH<sub>2</sub>CH<sub>3</sub>), 4.85 (d, 1H, CHP, <sup>2</sup>J<sub>PH</sub> = 26.9), 6.82 (d, 2H, NHC<sub>6</sub>H<sub>4</sub>OCH<sub>3</sub>, <sup>3</sup>J<sub>HH</sub> = 9.3), 6.89 (d, 1H, CH<sub>py</sub>, <sup>3</sup>J<sub>HH</sub> = 6), 6.91 (m, 3H, NHC<sub>6</sub>H<sub>4</sub>OCH<sub>3</sub>, OH), 7.32 (s, 2H, CHCC(CH<sub>3</sub>)<sub>3</sub>), 7.47 (d, 2H, NHC<sub>6</sub>H<sub>4</sub>OCH<sub>3</sub>, <sup>3</sup>J<sub>HH</sub> = 9.1), 7.55 (d, 2H, NHC<sub>6</sub>H<sub>4</sub>OCH<sub>3</sub>, <sup>3</sup>J<sub>HH</sub> = 9.3), 7.99 (d, 1H, CH<sub>py</sub>, <sup>3</sup>J<sub>HH</sub> = 8.5), 8.90 (s, 1H, NH), 9.40 (s, 1H, NH), 9.74 (s, 1H, NH), 10.36 (s, 1H, NH). <sup>13</sup>C{<sup>1</sup>H} NMR (DMSO-*d*<sub>6</sub>, 125.76 MHz), δ, ppm: 16.43 (d, OCH<sub>2</sub>CH<sub>3</sub>, <sup>3</sup>J<sub>PC</sub> = 6.1), 16.57 (d, OCH<sub>2</sub>CH<sub>3</sub>, <sup>3</sup>J<sub>PC</sub> = 6.1), 30.81 [C(CH<sub>3</sub>)<sub>3</sub>], 35.08 [C(CH<sub>3</sub>)<sub>3</sub>], 42.34 (d, CHP, <sup>1</sup>J<sub>PC</sub> = 139.4), 55.61 (OCH<sub>3</sub>), 55.68 (OCH<sub>3</sub>), 62.41 (d, OCH<sub>2</sub>CH<sub>3</sub>, <sup>2</sup>J<sub>PC</sub> = 6.1), 62.79 (d, OCH<sub>2</sub>CH<sub>3</sub>, <sup>2</sup>J<sub>PC</sub> = 7.1), 105.64 (CH<sub>py</sub>); 114.12 (NHC<sub>6</sub>H<sub>4</sub>OCH<sub>3</sub>), 114.22 (d, C<sub>py</sub>, <sup>2</sup>J<sub>PC</sub> = 3.0), 114.39 (NHC<sub>6</sub>H<sub>4</sub>OCH<sub>3</sub>), 121.51 (NHC<sub>6</sub>H<sub>4</sub>OCH<sub>3</sub>), 121.66 (NHC<sub>6</sub>H<sub>4</sub>OCH<sub>3</sub>), 126.13 [CHCC(CH<sub>3</sub>)<sub>2</sub>], 126.20 [CHCC(CH<sub>3</sub>)<sub>2</sub>], 127.02 (d, CCHP, <sup>2</sup>J<sub>PC</sub> = 4.0), 132.65 (NHC<sub>6</sub>H<sub>4</sub>OCH<sub>3</sub>), 132.81 (NHC<sub>6</sub>H<sub>4</sub>OCH<sub>3</sub>), 139.58 [C(CH<sub>3</sub>)<sub>3</sub>], 141.23 (d, CH<sub>py</sub>, <sup>3</sup>J<sub>PC</sub> = 5.1), 148.10 (d, C<sub>py</sub>, <sup>3</sup>J<sub>PC</sub> = 10.1), 150.07 (C<sub>py</sub>), 152.40 (C=O), 152.56 (C=O), 153.40 (COH), 155.30 (NHC<sub>6</sub>H<sub>4</sub>OCH<sub>3</sub>), 155.46 (NHC<sub>6</sub>H<sub>4</sub>OCH<sub>3</sub>). <sup>31</sup>P NMR (DMSO-*d*<sub>6</sub>, 242.94 MHz), δ, ppm: 26.38. Anal. Calcd for C<sub>40</sub>H<sub>52</sub>N<sub>5</sub>O<sub>8</sub>P (%): C, 63.06; H, 6.88; N, 9.19; P, 4.07. Found (%): C, 63.10; H, 6.92; N, 9.21; P, 4.10. HRMS (MALDI-TOF) m/z for C<sub>40</sub>H<sub>52</sub>N<sub>5</sub>O<sub>8</sub>P: calc. 761.4 [M]<sup>+</sup>, found: 762.7 [M+H]<sup>+</sup>, 784.7 [M+Na]<sup>+</sup>, 800.8 [M+K]<sup>+</sup>.

**Diisopropyl((2,6-bis-(3-(4-methoxyphenyl)ureido)pyridin-3-yl)(3,5-di-*tert*-butyl-4-hydroxyphenyl)methyl)phosphonate 10c.** White solid, yield 51%, M.p.: 201-202°C. IR (KBr), ν,

cm<sup>-1</sup>: 828; 1004; 1243; 1602; 1670, 1720; 2957; 3200; 3412. <sup>1</sup>H NMR (DMSO-*d*<sub>6</sub>, 600.13 MHz),  $\delta$ , ppm: 0.82 [d, 3H, OCH(CH<sub>3</sub>)<sub>2</sub>, <sup>3</sup>J<sub>HH</sub> = 6.2], 1.00 [d, 3H, CH(CH<sub>3</sub>)<sub>2</sub>, <sup>3</sup>J<sub>HH</sub> = 6.1], 1.19 [m, 6H, OCH(CH<sub>3</sub>)<sub>2</sub>], 1.35 [s, 18H, C(CH<sub>3</sub>)<sub>3</sub>], 3.72 (s, 3H, OCH<sub>3</sub>), 3.75 (s, 3H, OCH<sub>3</sub>), 4.41 [m, 1H, OCH(CH<sub>3</sub>)<sub>2</sub>], 4.51 [m, 1H, OCH(CH<sub>3</sub>)<sub>2</sub>], 4.73 (d, 1H, CHP, <sup>2</sup>J<sub>PH</sub> = 27.0), 6.82 (d, 2H, NHC<sub>6</sub>H<sub>4</sub>OCH<sub>3</sub>, <sup>3</sup>J<sub>HH</sub> = 9.0), 6.86 (m, 1H, CH<sub>py</sub>, <sup>3</sup>J<sub>HH</sub> = 6), 6.91 (m, 3H, NHC<sub>6</sub>H<sub>4</sub>OCH<sub>3</sub>, OH), 7.36 (s, 2H, CHCC(CH<sub>3</sub>)<sub>3</sub>), 7.47 (d, 2H, NHC<sub>6</sub>H<sub>4</sub>OCH<sub>3</sub>, <sup>3</sup>J<sub>HH</sub> = 8.7), 7.57 (d, 2H, NHC<sub>6</sub>H<sub>4</sub>OCH<sub>3</sub>, <sup>3</sup>J<sub>HH</sub> = 9.3), 8.03 (d, 1H, CH<sub>py</sub>, <sup>3</sup>J<sub>HH</sub> = 8.4), 8.94 (s, 1H, NH), 9.41 (s, 1H, NH), 9.68 (s, 1H, NH), 10.48 (s, 1H, NH). <sup>13</sup>C{<sup>1</sup>H} NMR (DMSO-*d*<sub>6</sub>, 150.92 MHz),  $\delta$ , ppm: 23.29 [d, OCH(CH<sub>3</sub>)<sub>2</sub>, <sup>3</sup>J<sub>PC</sub> = 4.5], 23.77 [d, OCH(CH<sub>3</sub>)<sub>2</sub>, <sup>3</sup>J<sub>PC</sub> = 4.5], 24.23 [OCH(CH<sub>3</sub>)<sub>2</sub>], 24.49 [OCH(CH<sub>3</sub>)<sub>2</sub>], 30.83 [C(CH<sub>3</sub>)<sub>3</sub>], 35.10 [C(CH<sub>3</sub>)<sub>3</sub>], 42.02 (d, CHP, <sup>1</sup>J<sub>PC</sub> = 138.9), 55.65 (OCH<sub>3</sub>), 55.73 (OCH<sub>3</sub>), 70.75 (d, OCH(CH<sub>3</sub>)<sub>2</sub>, <sup>2</sup>J<sub>PC</sub> = 6.1), 71.38 (d, OCH(CH<sub>3</sub>)<sub>2</sub>, <sup>2</sup>J<sub>PC</sub> = 6.1), 105.54 (CH<sub>py</sub>); 114.13 (NHC<sub>6</sub>H<sub>4</sub>OCH<sub>3</sub>), 114.45 (NHC<sub>6</sub>H<sub>4</sub>OCH<sub>3</sub>), 114.57 (d, C<sub>py</sub>, <sup>2</sup>J<sub>PC</sub> = 3.0), 121.44 (NHC<sub>6</sub>H<sub>4</sub>OCH<sub>3</sub>), 121.75 (NHC<sub>6</sub>H<sub>4</sub>OCH<sub>3</sub>), 126.33 [CHCC(CH<sub>3</sub>)<sub>2</sub>], 126.38 [CHCC(CH<sub>3</sub>)<sub>2</sub>], 127.24 (CHCP), 132.73 (NHC<sub>6</sub>H<sub>4</sub>OCH<sub>3</sub>), 132.87 (NHC<sub>6</sub>H<sub>4</sub>OCH<sub>3</sub>), 139.58 [CC(CH<sub>3</sub>)<sub>3</sub>], 141.03 (d, CH<sub>py</sub>, <sup>3</sup>J<sub>PC</sub> = 5.1), 148.08 (d, C<sub>py</sub>, <sup>3</sup>J<sub>PC</sub> = 9.1), 150.04 (C<sub>py</sub>), 152.35 (C=O), 152.63 (C=O), 153.39 (COH), 155.33 (NHC<sub>6</sub>H<sub>4</sub>OCH<sub>3</sub>), 155.47 (NHC<sub>6</sub>H<sub>4</sub>OCH<sub>3</sub>). <sup>31</sup>P NMR (DMSO-*d*<sub>6</sub>, 242.94 MHz),  $\delta$ , ppm: 25.53. Anal. Calcd for C<sub>48</sub>H<sub>52</sub>N<sub>5</sub>O<sub>6</sub>P (%): C, 63.86; H, 7.15; N, 8.87; P, 3.92. Found (%): C, 63.90; H, 7.18; N, 8.90; P, 3.93. HRMS (MALDI-TOF) m/z for C<sub>42</sub>H<sub>56</sub>N<sub>5</sub>O<sub>8</sub>P: calc. 789.4 [M]<sup>+</sup>, found: 790.6 [M+H]<sup>+</sup>, 812.6 [M+Na]<sup>+</sup>, 829.6 [M+K]<sup>+</sup>.

**Diphenyl((2,6-bis-(3-(4-methoxyphenyl)ureido)pyridin-3-yl)(3,5-di-*tert*-butyl-4-hydroxyphenyl)methyl)phosphonate 10d.** White solid, yield 66%, M.p.: 201-202°C. IR (KBr),  $\nu$ , cm<sup>-1</sup>: 827; 1026; 1244; 1600; 1662, 1720; 2955; 3078; 3367. <sup>1</sup>H NMR (DMSO-*d*<sub>6</sub>, 600.13 MHz),  $\delta$ , ppm: 1.32 [s, 18H, C(CH<sub>3</sub>)<sub>3</sub>], 3.72 (s, 3H, OCH<sub>3</sub>), 3.75 (s, 3H, OCH<sub>3</sub>), 5.45 (d, 1H, CHP, <sup>2</sup>J<sub>PH</sub> = 28.0), 6.68 (d, 2H, NHC<sub>6</sub>H<sub>4</sub>OCH<sub>3</sub>, <sup>3</sup>J<sub>HH</sub> = 8.0), 6.83 (d, 2H, NHC<sub>6</sub>H<sub>4</sub>OCH<sub>3</sub>, <sup>3</sup>J<sub>HH</sub> = 8.0), 6.85 (d, 1H, CH<sub>py</sub>, <sup>3</sup>J<sub>HH</sub> = 8.8), 6.92 (d, 2H, OC<sub>6</sub>H<sub>5</sub>, <sup>3</sup>J<sub>HH</sub> = 9.0), 6.98 (s, 1H, OH), 7.00 (d, 2H, OC<sub>6</sub>H<sub>5</sub>, <sup>3</sup>J<sub>HH</sub> = 8.8), 7.11 (t, 1H, OC<sub>6</sub>H<sub>5</sub>, <sup>3</sup>J<sub>HH</sub> = 7.4), 7.17 (t, 1H, OC<sub>6</sub>H<sub>5</sub>, <sup>3</sup>J<sub>HH</sub> = 7.6), 7.22 (t, 2H, OC<sub>6</sub>H<sub>5</sub>, <sup>3</sup>J<sub>HH</sub> = 7.8), 7.32 (t, 2H, OC<sub>6</sub>H<sub>5</sub>, <sup>3</sup>J<sub>HH</sub> = 7.8), 7.43 (s, 2H, CHCC(CH<sub>3</sub>)<sub>3</sub>), 7.49 (d, 2H, NHC<sub>6</sub>H<sub>4</sub>OCH<sub>3</sub>, <sup>3</sup>J<sub>HH</sub> = 8.9), 7.55 (d, 2H, NHC<sub>6</sub>H<sub>4</sub>OCH<sub>3</sub>, <sup>3</sup>J<sub>HH</sub> = 9.0), 8.14 (d, 1H, CH<sub>py</sub>, <sup>3</sup>J<sub>HH</sub> = 8.5), 9.01 (s, 1H, NH), 9.44 (s, 1H, NH), 9.76 (s, 1H, NH), 10.30 (s, 1H, NH). <sup>13</sup>C{<sup>1</sup>H} NMR (DMSO-*d*<sub>6</sub>, 100.57 MHz),  $\delta$ , ppm: 30.69 [C(CH<sub>3</sub>)<sub>3</sub>], 35.07 [C(CH<sub>3</sub>)<sub>3</sub>], 42.72 (d, CHP, <sup>1</sup>J<sub>PC</sub> = 140.4), 55.63 (OCH<sub>3</sub>), 55.70 (OCH<sub>3</sub>), 105.93 (CH<sub>py</sub>), 113.02 (d, C<sub>py</sub>, <sup>2</sup>J<sub>PC</sub> = 3.3), 114.16, (NHC<sub>6</sub>H<sub>4</sub>OCH<sub>3</sub>), 114.40 (NHC<sub>6</sub>H<sub>4</sub>OCH<sub>3</sub>), 120.58 (d, OC<sub>6</sub>H<sub>5</sub>, <sup>3</sup>J<sub>PC</sub> = 4.0), 120.75 (d, OC<sub>6</sub>H<sub>5</sub>, <sup>3</sup>J<sub>PC</sub> = 4.0), 121.63 (NHC<sub>6</sub>H<sub>4</sub>OCH<sub>3</sub>), 125.45 (CHCP), 125.49 [CHCC(CH<sub>3</sub>)<sub>3</sub>], 125.71 [CHCC(CH<sub>3</sub>)<sub>3</sub>], 126.49 (OC<sub>6</sub>H<sub>5</sub>), 126.57 (OC<sub>6</sub>H<sub>5</sub>), 129.98 (OC<sub>6</sub>H<sub>5</sub>), 130.29 (OC<sub>6</sub>H<sub>5</sub>), 132.55 (NHC<sub>6</sub>H<sub>4</sub>OCH<sub>3</sub>), 132.74 (NHC<sub>6</sub>H<sub>4</sub>OCH<sub>3</sub>), 139.90 [CC(CH<sub>3</sub>)<sub>3</sub>], 141.04 (d, CH<sub>py</sub>, <sup>3</sup>J<sub>PC</sub> = 5.1), 148.26 (d, CH<sub>py</sub>, <sup>3</sup>J<sub>PC</sub> = 12.1), 150.40 (d, OC<sub>6</sub>H<sub>5</sub>, <sup>2</sup>J<sub>PC</sub> = 8.1), 150.44 (C<sub>py</sub>), 150.67 (d, OC<sub>6</sub>H<sub>5</sub>, <sup>2</sup>J<sub>PC</sub> = 10.1), 152.49 (C=O), 153.43 (COH), 155.32 (NHC<sub>6</sub>H<sub>4</sub>OCH<sub>3</sub>), 155.51 (NHC<sub>6</sub>H<sub>4</sub>OCH<sub>3</sub>). <sup>31</sup>P NMR (DMSO-*d*<sub>6</sub>, 242.94 MHz),  $\delta$ , ppm: 20.43. Anal. Calcd for C<sub>48</sub>H<sub>52</sub>N<sub>5</sub>O<sub>8</sub>P (%): C, 67.20; H, 6.11; N, 8.16; P, 3.61. Found (%): C, 67.25; H, 6.14; N, 8.20; P, 3.64. HRMS (MALDI-TOF) m/z for C<sub>48</sub>H<sub>52</sub>N<sub>5</sub>O<sub>8</sub>P: calc. 857.4 [M]<sup>+</sup>, found: 858.9 [M+H]<sup>+</sup>; 880.9 [M+Na]<sup>+</sup>, 896.9 [M+K]<sup>+</sup>.

**Diethyl((2,6-bis(3-(*p*-chlorophenyl)ureido)pyridin-3-yl)(3,5-di-*tert*-butyl-4-hydroxyphenyl)methyl)phosphonate 11b.** White solid, yield 65%, m.p. 219-220°C. IR (KBr),  $\nu$ , cm<sup>-1</sup>: 862; 1020; 1260; 1560; 1628, 1737; 3340; 3630. <sup>1</sup>H NMR (DMSO-*d*<sub>6</sub>, 400.13 MHz),  $\delta$ , ppm: 1.03 (t, 3H, OCH<sub>2</sub>CH<sub>3</sub>, <sup>3</sup>J<sub>HH</sub> = 7.0), 1.10 (t, 3H, OCH<sub>2</sub>CH<sub>3</sub>, <sup>3</sup>J<sub>HH</sub> = 7.0), 1.35 [s, 18H, CH(CH<sub>3</sub>)<sub>2</sub>], 3.83 (m, 1H, OCH<sub>2</sub>CH<sub>3</sub>), 3.94 (m, 1H, OCH<sub>2</sub>CH<sub>3</sub>), 3.94 (m, 2H, OCH<sub>2</sub>CH<sub>3</sub>), 4.86 (d, 1H, CHP, <sup>2</sup>J<sub>PH</sub> = 26.9), 6.91 (d, 1H, CH<sub>py</sub>, <sup>3</sup>J<sub>HH</sub> = 8.9), 6.93 (s, 1H, OH), 7.30 (d, 2H, NHC<sub>6</sub>H<sub>4</sub>Cl, <sup>3</sup>J<sub>HH</sub> = 8.9), 7.32 (s, 2H, CHCC(CH<sub>3</sub>)<sub>3</sub>), 7.40 (d, 2H, NHC<sub>6</sub>H<sub>4</sub>Cl, <sup>3</sup>J<sub>HH</sub> = 8.9), 7.62 (d, 2H, NHC<sub>6</sub>H<sub>4</sub>Cl, <sup>3</sup>J<sub>HH</sub> = 8.9), 7.69 (d, 2H,

NHC<sub>6</sub>H<sub>4</sub>Cl, <sup>3</sup>J<sub>HH</sub> = 8.9), 8.02 (d, 1H, CHpy, <sup>3</sup>J<sub>HH</sub> = 9.9), 9.07 (s, 1H, NH), 9.61 (s, 1H, NH), 9.95 (s, 1H, NH), 10.68 (s, 1H, NH). <sup>13</sup>C{<sup>1</sup>H} NMR (DMSO-*d*<sub>6</sub>, 100.57 MHz), δ, ppm: 16.83 (d, OCH<sub>2</sub>CH<sub>3</sub>, <sup>3</sup>J<sub>PC</sub> = 5.1), 16.98 (d, OCH<sub>2</sub>CH<sub>3</sub>, <sup>3</sup>J<sub>PC</sub> = 5.1), 31.21 [C(CH<sub>3</sub>)<sub>3</sub>], 35.48 [C(CH<sub>3</sub>)<sub>3</sub>], 42.24 (d, CHP, <sup>1</sup>J<sub>PC</sub> = 139.4), 62.81 (d, OCH<sub>2</sub>CH<sub>3</sub>, <sup>2</sup>J<sub>PC</sub> = 7.1), 63.19 (d, OCH<sub>2</sub>CH<sub>3</sub>, <sup>2</sup>J<sub>PC</sub> = 7.1), 106.58 (CHpy); 116.47 (CHpy), 114.61 (d, Cpy, <sup>2</sup>J<sub>PC</sub> = 3.0), 121.90 (NHC<sub>6</sub>H<sub>4</sub>Cl), 122.05 (NHC<sub>6</sub>H<sub>4</sub>Cl), 126.52 [CHCC(CH<sub>3</sub>)<sub>2</sub>], 126.59 [CHCC(CH<sub>3</sub>)<sub>2</sub>], 126.80 (NHC<sub>6</sub>H<sub>4</sub>Cl), 126.87 (NHC<sub>6</sub>H<sub>4</sub>Cl), 127.42 (d, CCHP, <sup>2</sup>J<sub>PC</sub> = 3.0), 130.47 (d, CHpy, <sup>3</sup>J<sub>PC</sub> = 4.0), 129.90 (NHC<sub>6</sub>H<sub>4</sub>Cl), 130.17 (NHC<sub>6</sub>H<sub>4</sub>Cl), 139.27 (NHC<sub>6</sub>H<sub>4</sub>Cl), 139.29 (NHC<sub>6</sub>H<sub>4</sub>Cl), 139.97 [CC(CH<sub>3</sub>)<sub>3</sub>], 141.62 (d, CHpy, <sup>2</sup>J<sub>PC</sub> = 3.0), 148.49 (d, Cpy, <sup>2</sup>J<sub>PC</sub> = 10.1), 150.46 (Cpy), 152.79 (C=O), 152.95 (C=O), 153.79 (COH). <sup>31</sup>P NMR (DMSO-*d*<sub>6</sub>, 161.90 MHz), δ, ppm: 25.77. HRMS (MALDI-TOF/TOF) m/z for C<sub>38</sub>H<sub>46</sub>Cl<sub>2</sub>N<sub>5</sub>O<sub>6</sub>P: calc. 769.3 [M]<sup>+</sup>, found: 770.4 [M+H]<sup>+</sup>, 792.4 [M+Na]<sup>+</sup>, 812.5 [M+K]<sup>+</sup>.

**Diisopropyl((2,6-bis(3-(*p*-chlorophenyl)ureido)pyridin-3-yl)(3,5-di-*tert*-butyl-4-hydroxyphenyl)methyl)phosphonate 11c.** White solid, yield 51%, M.p.: 222-223°C. IR (KBr), ν, cm<sup>-1</sup>: 852; 1011; 1248; 1598; 1620, 1735; 3338; 3621. <sup>1</sup>H NMR (DMSO-*d*<sub>6</sub>, 400.13 MHz), δ, ppm: 0.81 (d, 3H, CH(CH<sub>3</sub>)<sub>2</sub>, <sup>3</sup>J<sub>HH</sub> = 6.1), 0.99 (d, 3H, CH(CH<sub>3</sub>)<sub>2</sub>, <sup>3</sup>J<sub>HH</sub> = 6.1), 1.19 [d, 6H, OCH(CH<sub>3</sub>)<sub>2</sub>, <sup>3</sup>J<sub>HH</sub> = 6.1], 1.35 [s, 18H, C(CH<sub>3</sub>)<sub>3</sub>], 4.40 (m, 1H, CH(CH<sub>3</sub>)<sub>2</sub>), 4.52 (m, 1H, CH(CH<sub>3</sub>)<sub>2</sub>), 4.73 (d, 1H, CHP, <sup>2</sup>J<sub>PH</sub> = 26.9), 6.87 (d, 1H, CHpy, <sup>3</sup>J<sub>HH</sub> = 8.6), 6.89 (s, 1H, OH), 7.30 (d, 2H, NHC<sub>6</sub>H<sub>4</sub>Cl, <sup>3</sup>J<sub>HH</sub> = 8.7), 7.36 (s, 2H, CHCC(CH<sub>3</sub>)<sub>3</sub>), 7.40 (d, 1H, NHC<sub>6</sub>H<sub>4</sub>Cl, <sup>3</sup>J<sub>HH</sub> = 8.8), 7.61 (d, 1H, NHC<sub>6</sub>H<sub>4</sub>Cl, <sup>3</sup>J<sub>HH</sub> = 8.8), 7.70 (d, 1H, NHC<sub>6</sub>H<sub>4</sub>Cl, <sup>3</sup>J<sub>HH</sub> = 8.8), 8.06 (d, 1H, CHpy, <sup>3</sup>J<sub>HH</sub> = 8.6), 9.10 (s, 1H, NH), 9.61 (s, 1H, NH), 9.89 (s, 1H, NH), 10.75 (s, 1H, NH). <sup>13</sup>C{<sup>1</sup>H} NMR (DMSO-*d*<sub>6</sub>, 100.57 MHz), δ, ppm: 23.75 [d, OCH(CH<sub>3</sub>)<sub>2</sub>, <sup>3</sup>J<sub>PC</sub> = 5.1], 24.26 [d, OCH(CH<sub>3</sub>)<sub>2</sub>, <sup>3</sup>J<sub>PC</sub> = 4.5], 24.72 [OCH(CH<sub>3</sub>)<sub>2</sub>], 24.99 [OCH(CH<sub>3</sub>)<sub>2</sub>], 31.31 [C(CH<sub>3</sub>)<sub>3</sub>]; 35.60 [C(CH<sub>3</sub>)<sub>3</sub>], 43.57 (d, CHP, <sup>1</sup>J<sub>PC</sub> = 138.4), 71.28 (d, OCH(CH<sub>3</sub>)<sub>2</sub>, <sup>2</sup>J<sub>PC</sub> = 8.1), 71.98 (d, OCH(CH<sub>3</sub>)<sub>2</sub>, <sup>2</sup>J<sub>PC</sub> = 8.1), 106.70 (CHpy); 115.79 (Cpy), 121.58 (NHC<sub>6</sub>H<sub>4</sub>Cl), 122.22 (NHC<sub>6</sub>H<sub>4</sub>Cl), 126.80 (NHC<sub>6</sub>H<sub>4</sub>Cl), 126.88 (NHC<sub>6</sub>H<sub>4</sub>Cl), 127.17 [CHCC(CH<sub>3</sub>)<sub>2</sub>], 127.21 [CHCC(CH<sub>3</sub>)<sub>2</sub>], 127.59 (CCHP), 129.30 (NHC<sub>6</sub>H<sub>4</sub>Cl), 129.64 (NHC<sub>6</sub>H<sub>4</sub>Cl), 139.21 (NHC<sub>6</sub>H<sub>4</sub>Cl), 139.27 (NHC<sub>6</sub>H<sub>4</sub>Cl), 140.14 [CC(CH<sub>3</sub>)<sub>3</sub>], 141.71 (CHpy), 148.33 (Cpy), 150.36 (Cpy), 152.70 (C=O), 153.00 (C=O), 153.94 (COH). <sup>31</sup>P NMR (DMSO-*d*<sub>6</sub>, 161.90 MHz), δ, ppm: 23.34. Anal. Calcd for C<sub>40</sub>H<sub>50</sub>Cl<sub>2</sub>N<sub>5</sub>O<sub>6</sub>P (%): C, 60.15; H, 6.31; Cl, 8.88; N, 8.77; P, 3.88. Found (%): C, 60.20; H, 6.33; Cl, 8.90; N, 8.80; P, 3.90. HRMS (MALDI-TOF) m/z for C<sub>40</sub>H<sub>50</sub>Cl<sub>2</sub>N<sub>5</sub>O<sub>6</sub>P: calc. 797.3 [M]<sup>+</sup>, found: 798.4 [M+H]<sup>+</sup>, 820.4 [M+Na]<sup>+</sup>, 836.4 [M+K]<sup>+</sup>.

**Diphenyl((2,6-bis(3-(*p*-chlorophenyl)ureido)pyridin-3-yl)(3,5-di-*tert*-butyl-4-hydroxyphenyl)methyl)phosphonate 11d.** White solid, yield 66%, M.p.: 292-293°C. IR (KBr), ν, cm<sup>-1</sup>: 827; 1092; 1244; 1600; 1662, 1720; 2955; 3078, 3367. <sup>1</sup>H NMR (DMSO-*d*<sub>6</sub>, 400.13 MHz), δ, ppm: 1.31 [s, 18H, C(CH<sub>3</sub>)<sub>3</sub>], 5.46 (d, 1H, CHP, <sup>2</sup>J<sub>PH</sub> = 28.3), 6.68 (d, 2H, OC<sub>6</sub>H<sub>5</sub>, <sup>3</sup>J<sub>HH</sub> = 8.4), 6.97 (d, 1H, CHpy, <sup>3</sup>J<sub>HH</sub> = 8.6), 7.00 (s, 1H, OH), 7.00 (d, 2H, OC<sub>6</sub>H<sub>5</sub>, <sup>3</sup>J<sub>HH</sub> = 8.4), 7.11 (t, 1H, OC<sub>6</sub>H<sub>5</sub>, <sup>3</sup>J<sub>HH</sub> = 7.4), 7.17 (t, 1H, OC<sub>6</sub>H<sub>5</sub>, <sup>3</sup>J<sub>HH</sub> = 7.2), 7.22 (t, 2H, OC<sub>6</sub>H<sub>5</sub>, <sup>3</sup>J<sub>HH</sub> = 7.8), 7.31 (d, 2H, NHC<sub>6</sub>H<sub>4</sub>Cl, <sup>3</sup>J<sub>HH</sub> = 8.9), 7.32 (t, 2H, OC<sub>6</sub>H<sub>5</sub>, <sup>3</sup>J<sub>HH</sub> = 7.8), 7.41 (d, 2H, NHC<sub>6</sub>H<sub>4</sub>Cl, <sup>3</sup>J<sub>HH</sub> = 8.9), 7.42 (s, 2H, CHCC(CH<sub>3</sub>)<sub>3</sub>), 7.62 (d, 2H, NHC<sub>6</sub>H<sub>4</sub>Cl, <sup>3</sup>J<sub>HH</sub> = 8.9), 7.69 (d, 2H, NHC<sub>6</sub>H<sub>4</sub>Cl, <sup>3</sup>J<sub>HH</sub> = 8.9), 8.17 (dd, 1H, CHpy, <sup>3</sup>J<sub>HH</sub> = 8.5, 1.3), 9.22 (s, 1H, NH), 9.66 (s, 1H, NH), 10.01 (s, 1H, NH), 10.63 (s, 1H, NH). <sup>13</sup>C{<sup>1</sup>H} NMR (DMSO-*d*<sub>6</sub>, 125.76 MHz), δ, ppm: 30.69 [C(CH<sub>3</sub>)<sub>3</sub>], 35.08 [C(CH<sub>3</sub>)<sub>3</sub>], 42.73 (d, CHP, <sup>1</sup>J<sub>PC</sub> = 138.6), 106.52 (CHpy), 113.79 (Cpy), 120.59 (d, OC<sub>6</sub>H<sub>5</sub>, <sup>3</sup>J<sub>PC</sub> = 2.5), 120.75 (d, OC<sub>6</sub>H<sub>5</sub>, <sup>3</sup>J<sub>PC</sub> = 2.5), 121.20, (NHC<sub>6</sub>H<sub>5</sub>Cl), 121.59 (NHC<sub>6</sub>H<sub>5</sub>Cl), 125.42 (d, CCHP, <sup>2</sup>J<sub>PC</sub> = 5.0), 125.51 [CHCC(CH<sub>3</sub>)<sub>3</sub>], 125.72 [CHCC(CH<sub>3</sub>)<sub>3</sub>], 126.51 (NHC<sub>6</sub>H<sub>5</sub>Cl), 126.58 (NHC<sub>6</sub>H<sub>5</sub>Cl), 126.66 (OC<sub>6</sub>H<sub>5</sub>), 126.71 (OC<sub>6</sub>H<sub>5</sub>), 128.84 (NHC<sub>6</sub>H<sub>5</sub>Cl), 129.10 (NHC<sub>6</sub>H<sub>5</sub>Cl), 129.99 (OC<sub>6</sub>H<sub>5</sub>), 130.29 (OC<sub>6</sub>H<sub>5</sub>), 138.60 (NHC<sub>6</sub>H<sub>5</sub>Cl), 138.67 (NHC<sub>6</sub>H<sub>5</sub>Cl), 139.92 [CC(CH<sub>3</sub>)<sub>3</sub>], 141.25 (d, CHpy, <sup>3</sup>J<sub>PC</sub> = 6.3), 147.92 (d, CHpy, <sup>3</sup>J<sub>PC</sub> = 11.3), 150.24 (Cpy), 150.38 (d, OC<sub>6</sub>H<sub>5</sub>, <sup>2</sup>J<sub>PC</sub> = 10.1), 150.65 (d, OC<sub>6</sub>H<sub>5</sub>, <sup>2</sup>J<sub>PC</sub> = 10.1), 152.36 (C=O), 152.39 (C=O), 153.93 (COH). <sup>31</sup>P NMR



(DMSO-*d*<sub>6</sub>, 161.90 MHz),  $\delta$ , ppm: 19.19. Anal. Calcd for C<sub>46</sub>H<sub>46</sub>Cl<sub>2</sub>N<sub>5</sub>O<sub>6</sub>P (%): C, 63.74; H, 5.35; Cl, 8.18; N, 8.08; P, 3.57. Found (%): C, 63.77; H, 5.36; Cl, 8.20; N, 8.10; P, 3.60. HRMS (MALDI-TOF) *m/z* for C<sub>46</sub>H<sub>46</sub>Cl<sub>2</sub>N<sub>5</sub>O<sub>6</sub>P: calc. 865.3 [M]<sup>+</sup>, found: 866.6 [M+H]<sup>+</sup>; 888.9 [M+Na]<sup>+</sup>, 904.7 [M+K]<sup>+</sup>.

**Diisopropyl((2,6-bis(3-(*p*-chlorophenyl)ureido)pyridin-3-yl)(3,5-di-*tert*-butyl-4-hydroxyphenyl)methyl)phosphonate 12c.** Yellow solid, yield 52%, M.p.: 273-274°C. IR (KBr),  $\nu$ , cm<sup>-1</sup>: 848; 1026; 1210; 1595; 1680, 1713; 2957; 3326, 3602. <sup>1</sup>H NMR (DMSO-*d*<sub>6</sub>, 600.13 MHz),  $\delta$ , ppm: 0.81 (d, 3H, CH(CH<sub>3</sub>)<sub>2</sub>, <sup>3</sup>*J*<sub>HH</sub> = 5.8), 0.99 (d, 3H, CH(CH<sub>3</sub>)<sub>2</sub>, <sup>3</sup>*J*<sub>HH</sub> = 5.9), 1.18 [m, 6H, OCH(CH<sub>3</sub>)<sub>2</sub>], 1.33 [s, 18H, C(CH<sub>3</sub>)<sub>3</sub>], 4.42 (m, 1H, CH(CH<sub>3</sub>)<sub>2</sub>), 4.52 (m, 1H, CH(CH<sub>3</sub>)<sub>2</sub>), 4.78 (d, 1H, CHP, <sup>2</sup>*J*<sub>PH</sub> = 27.7), 6.90 (s, 1H, OH), 6.98 (d, 1H, CH<sub>py</sub>, <sup>3</sup>*J*<sub>HH</sub> = 8.7), 7.36 (s, 2H, CHCC(CH<sub>3</sub>)<sub>3</sub>), 7.85 (d, 2H, NHC<sub>6</sub>H<sub>4</sub>NO<sub>2</sub>, <sup>3</sup>*J*<sub>HH</sub> = 8.9), 7.91 (d, 1H, NHC<sub>6</sub>H<sub>4</sub>NO<sub>2</sub>, <sup>3</sup>*J*<sub>HH</sub> = 8.7), 8.10 (d, 1H, NHC<sub>6</sub>H<sub>4</sub>NO<sub>2</sub>, <sup>3</sup>*J*<sub>HH</sub> = 9.1), 8.16 (d, 1H, NHC<sub>6</sub>H<sub>4</sub>NO<sub>2</sub>, <sup>3</sup>*J*<sub>HH</sub> = 9.0), 8.27 (d, 1H, CH<sub>py</sub>, <sup>3</sup>*J*<sub>HH</sub> = 8.7), 9.36 (s, 1H, NH), 9.88 (s, 1H, NH), 10.38 (s, 1H, NH), 11.15 (s, 1H, NH). <sup>13</sup>C{<sup>1</sup>H} NMR (DMSO-*d*<sub>6</sub>, 100.57 MHz),  $\delta$ , ppm: 23.20 [d, OCH(CH<sub>3</sub>)<sub>2</sub>, <sup>3</sup>*J*<sub>PC</sub> = 5.3], 23.73 [d, OCH(CH<sub>3</sub>)<sub>2</sub>, <sup>3</sup>*J*<sub>PC</sub> = 5.3], 24.16 [d, OCH(CH<sub>3</sub>)<sub>2</sub>, <sup>3</sup>*J*<sub>PC</sub> = 3.4], 24.46 [d, OCH(CH<sub>3</sub>)<sub>2</sub>, <sup>3</sup>*J*<sub>PC</sub> = 3.4], 30.75 [C(CH<sub>3</sub>)<sub>3</sub>], 35.06 [C(CH<sub>3</sub>)<sub>3</sub>], 43.17 (d, CHP, <sup>1</sup>*J*<sub>PC</sub> = 141.4), 70.83 [d, OCH(CH<sub>3</sub>)<sub>2</sub>, <sup>2</sup>*J*<sub>PC</sub> = 7.1], 71.59 [d, OCH(CH<sub>3</sub>)<sub>2</sub>, <sup>2</sup>*J*<sub>PC</sub> = 7.1], 107.15 (CH<sub>py</sub>), 116.53 [d, C<sub>py</sub>, <sup>2</sup>*J*<sub>PC</sub> = 4.1], 118.88 (NHC<sub>6</sub>H<sub>4</sub>NO<sub>2</sub>), 119.55 (NHC<sub>6</sub>H<sub>4</sub>NO<sub>2</sub>), 125.19 (NHC<sub>6</sub>H<sub>4</sub>NO<sub>2</sub>), 125.54 (NHC<sub>6</sub>H<sub>4</sub>NO<sub>2</sub>), 126.30 [CHCC(CH<sub>3</sub>)<sub>3</sub>], 126.37 [CHCC(CH<sub>3</sub>)<sub>3</sub>], 126.92 (d, CCHP, <sup>2</sup>*J*<sub>PC</sub> = 5.1), 139.66 [CC(CH<sub>3</sub>)<sub>3</sub>], 141.51 [d, CH<sub>py</sub>, <sup>3</sup>*J*<sub>PC</sub> = 5.1], 142.16 (NHC<sub>6</sub>H<sub>4</sub>NO<sub>2</sub>), 142.22 (NHC<sub>6</sub>H<sub>4</sub>NO<sub>2</sub>), 146.16 (NHC<sub>6</sub>H<sub>4</sub>NO<sub>2</sub>), 146.22 (NHC<sub>6</sub>H<sub>4</sub>NO<sub>2</sub>), 141.51 (d, C<sub>py</sub>, <sup>3</sup>*J*<sub>PC</sub> = 10.1), 149.56 (C<sub>py</sub>), 151.98 (C=O), 152.21 (C=O), 153.46 (COH). <sup>31</sup>P NMR (DMSO-*d*<sub>6</sub>, 242.94 MHz),  $\delta$ , ppm: 24.35. HRMS (MALDI-TOF) *m/z* for C<sub>40</sub>H<sub>50</sub>N<sub>7</sub>O<sub>10</sub>P: calc. 819.3 [M]<sup>+</sup>, found: 819.7 [M+H]<sup>+</sup>.

**Diphenyl((2,6-bis(3-(*p*-chlorophenyl)ureido)pyridin-3-yl)(3,5-di-*tert*-butyl-4-hydroxyphenyl)methyl)phosphonate 12d.** Yellow solid, yield 60%, M.p.: 292-293°C. IR (KBr),  $\nu$ , cm<sup>-1</sup>: 847; 1032; 1248; 1598; 1622, 1736; 2958; 3337, 3602. <sup>1</sup>H NMR (DMSO-*d*<sub>6</sub>, 600.13 MHz),  $\delta$ , ppm: 1.31 [s, 18H, C(CH<sub>3</sub>)<sub>3</sub>], 5.47 (d, 1H, CHP, <sup>2</sup>*J*<sub>PH</sub> = 28.0), 6.68 (d, 2H, OC<sub>6</sub>H<sub>5</sub>, <sup>3</sup>*J*<sub>HH</sub> = 8.0), 7.00 (d, 2H, OC<sub>6</sub>H<sub>5</sub>, <sup>3</sup>*J*<sub>HH</sub> = 8.4), 7.01 (s, 1H, OH), 7.11 (m, 2H, CH<sub>py</sub>, OC<sub>6</sub>H<sub>5</sub>), 7.17 (t, 1H, OC<sub>6</sub>H<sub>5</sub>, <sup>3</sup>*J*<sub>HH</sub> = 7.3), 7.22 (t, 2H, OC<sub>6</sub>H<sub>5</sub>, <sup>3</sup>*J*<sub>HH</sub> = 7.9), 7.32 (t, 2H, OC<sub>6</sub>H<sub>5</sub>, <sup>3</sup>*J*<sub>HH</sub> = 7.9), 7.42 (s, 2H, CHCC(CH<sub>3</sub>)<sub>3</sub>), 7.85 (d, 2H, NHC<sub>6</sub>H<sub>4</sub>NO<sub>2</sub>, <sup>3</sup>*J*<sub>HH</sub> = 9.0), 7.89 (d, 2H, NHC<sub>6</sub>H<sub>4</sub>NO<sub>2</sub>, <sup>3</sup>*J*<sub>HH</sub> = 9.3), 8.17 (d, 2H, NHC<sub>6</sub>H<sub>4</sub>NO<sub>2</sub>, <sup>3</sup>*J*<sub>HH</sub> = 9.2), 8.22 (d, 1H, CH<sub>py</sub>, <sup>3</sup>*J*<sub>HH</sub> = 8.6), 8.26 (d, 2H, NHC<sub>6</sub>H<sub>4</sub>NO<sub>2</sub>, <sup>3</sup>*J*<sub>HH</sub> = 9.1), 9.41 (s, 1H, NH), 9.91 (s, 1H, NH), 10.39 (s, 1H, NH), 10.97 (s, 1H, NH). <sup>13</sup>C{<sup>1</sup>H} NMR (DMSO-*d*<sub>6</sub>, 100.57 MHz),  $\delta$ , ppm: 31.16 [C(CH<sub>3</sub>)<sub>3</sub>], 35.51 [C(CH<sub>3</sub>)<sub>3</sub>], 44.44 (d, CHP, <sup>1</sup>*J*<sub>PC</sub> = 140.4), 113.38 (CH<sub>py</sub>), 116.84 (CH<sub>py</sub>), 118.42 (NHC<sub>6</sub>H<sub>4</sub>NO<sub>2</sub>), 118.53 (NHC<sub>6</sub>H<sub>4</sub>NO<sub>2</sub>), 121.10 (d, OC<sub>6</sub>H<sub>5</sub>, <sup>2</sup>*J*<sub>PC</sub> = 4.0), 121.41 (d, OC<sub>6</sub>H<sub>5</sub>, <sup>2</sup>*J*<sub>PC</sub> = 4.0), 125.94 (OC<sub>6</sub>H<sub>5</sub>), 126.11 (NHC<sub>6</sub>H<sub>4</sub>NO<sub>2</sub>), 126.21 (OC<sub>6</sub>H<sub>5</sub>), 126.99 [CHCC(CH<sub>3</sub>)<sub>3</sub>], 127.07 [CHCC(CH<sub>3</sub>)<sub>3</sub>], 127.34 [CCHP], 130.46 (OC<sub>6</sub>H<sub>5</sub>), 130.77 (OC<sub>6</sub>H<sub>5</sub>), 139.45 (C<sub>py</sub>), 140.27 [CC(CH<sub>3</sub>)<sub>3</sub>], 142.04 (NHC<sub>6</sub>H<sub>4</sub>NO<sub>2</sub>), 142.09 (NHC<sub>6</sub>H<sub>4</sub>NO<sub>2</sub>), 147.23 (NHC<sub>6</sub>H<sub>4</sub>NO<sub>2</sub>), 147.44 (NHC<sub>6</sub>H<sub>4</sub>NO<sub>2</sub>), 148.98 [d, CH<sub>py</sub>, <sup>3</sup>*J*<sub>PC</sub> = 4.0], 150.90 (d, OC<sub>6</sub>H<sub>5</sub>, <sup>2</sup>*J*<sub>PC</sub> = 10.1), 151.24 (d, OC<sub>6</sub>H<sub>5</sub>, <sup>2</sup>*J*<sub>PC</sub> = 10.1), 152.83 (C<sub>py</sub>), 153.50 (COH), 154.26 (C=O), 154.27 (C=O). <sup>31</sup>P NMR (DMSO-*d*<sub>6</sub>, 242.94 MHz),  $\delta$ , ppm: 19.12. Anal. Calcd for C<sub>46</sub>H<sub>46</sub>N<sub>7</sub>O<sub>8</sub>P (%): C, 62.23; H, 5.22; N, 11.04; P, 3.49. Found (%): C, 62.27; H, 5.23; N, 11.07; P, 3.51. HRMS (MALDI-TOF) *m/z* for C<sub>46</sub>H<sub>46</sub>N<sub>7</sub>O<sub>10</sub>P: calc. 887.3 [M]<sup>+</sup>, found: 888.5 [M+H]<sup>+</sup>; 910.6 [M+Na]<sup>+</sup>.

**Dimethyl((2,4-bis(3-(*m*-tolyl)ureido)phenyl)(3,5-di-*tert*-butyl-4-hydroxyphenyl)methyl)phosphonate 13a.** White solid, yield 88%, M.p.: 252-253°C. IR (KBr),  $\nu$ , cm<sup>-1</sup>: 830; 1039; 1225; 1559; 1611, 1639; 2954; 3325, 3620. <sup>1</sup>H NMR (DMSO-*d*<sub>6</sub>, 600.13 MHz),  $\delta$ , ppm: 1.33 [s, 18H, C(CH<sub>3</sub>)<sub>3</sub>], 2.28 (s, 6H, CH<sub>3</sub>), 3.51 (t, 6H, OCH<sub>3</sub>, <sup>3</sup>*J*<sub>PH</sub> = 11.9), 4.74 (d, 3H, OCH<sub>3</sub>, <sup>3</sup>*J*<sub>PH</sub> = 27.1), 6.79 (s, 1H, NHC<sub>6</sub>H<sub>4</sub>CH<sub>3</sub>), 6.79 (s, 1H, OH), 6.86 (s, 1H, NHC<sub>6</sub>H<sub>4</sub>CH<sub>3</sub>), 7.12-7.31 (m, 7H, CH<sub>m</sub>-

$\text{Ph, NHC}_6\text{H}_4\text{CH}_3$ ), 7.31 (s, 2H,  $\text{CHCC}(\text{CH}_3)_3$ ), 7.64 (d, 1H,  $\text{CH}_{m\text{-Ph}}$ ,  $^3J_{\text{HH}} = 9.0$ ), 7.79 (s, 1H,  $\text{CH}_{m\text{-Ph}}$ ), 8.15 (s, 1H, NH), 8.49 (s, 1H, NH), 8.68 (s, 1H, NH), 8.77 (s, 1H, NH).  $^{13}\text{C}\{^1\text{H}\}$  NMR (DMSO- $d_6$ , 125.76 MHz),  $\delta$ , ppm: 21.68 ( $\text{CH}_3$ ), 21.70 ( $\text{CH}_3$ ), 30.81 [ $\text{C}(\text{CH}_3)_3$ ], 35.02 [ $\text{C}(\text{CH}_3)_3$ ], 42.02 (d, CHP,  $^1J_{\text{PC}} = 139.9$ ), 53.35 (d,  $\text{OCH}_3$ ,  $^2J_{\text{PC}} = 7.6$ ), 53.43 (d,  $\text{OCH}_3$ ,  $^2J_{\text{PC}} = 7.6$ ), 114.42 (CH), 114.86 ( $\text{CH}_{m\text{-Ph}}$ ), 115.84 ( $\text{NHC}_6\text{H}_4\text{CH}_3$ ), 119.19 ( $\text{NHC}_6\text{H}_4\text{CH}_3$ ), 123.08 ( $\text{NHC}_6\text{H}_5\text{CH}_3$ ), 123.59 (d,  $\text{C}_{m\text{-Ph}}$ ,  $^2J_{\text{PC}} = 1.3$ ), 126.00 [ $\text{CHCC}(\text{CH}_3)_3$ ], 126.06 [ $\text{CHCC}(\text{CH}_3)_3$ ], 127.78 (d,  $\text{CCHP}$ ,  $^2J_{\text{PC}} = 3.8$ ), 129.07 ( $\text{NHC}_6\text{H}_4\text{CH}_3$ ), 129.82 ( $\text{CH}_{m\text{-Ph}}$ ), 137.18 (d,  $\text{C}_{m\text{-Ph}}$ ,  $^3J_{\text{PC}} = 3.8$ ), 138.39 ( $\text{NHC}_6\text{H}_4\text{CH}_3$ ), 138.42 ( $\text{NHC}_6\text{H}_4\text{CH}_3$ ), 139.12 ( $\text{C}_{m\text{-Ph}}$ ), 139.50 [ $\text{CC}(\text{CH}_3)_3$ ], 140.01 ( $\text{NHC}_6\text{H}_4\text{CH}_3$ ), 140.23 ( $\text{NHC}_6\text{H}_4\text{CH}_3$ ), 152.87 (C=O), 152.98 (C=O), 153.38 (COH).  $^{31}\text{P}$  NMR (DMSO- $d_6$ , 242.94 MHz),  $\delta$ , ppm: 28.85. Anal. Calcd for  $\text{C}_{39}\text{H}_{49}\text{N}_4\text{O}_6\text{P}$  (%): C, 66.84; H, 7.05; N, 7.99; P, 4.42. Found (%): C, 66.87; H, 7.08; N, 8.00; P, 4.46. HRMS (MALDI-TOF)  $m/z$  for  $\text{C}_{39}\text{H}_{49}\text{N}_4\text{O}_6\text{P}$ : calc. 700.3  $[\text{M}]^+$ , found: 701.5  $[\text{M}+\text{H}]^+$ ; 723.5  $[\text{M}+\text{Na}]^+$ , 739.5  $[\text{M}+\text{K}]^+$ .

**Diethyl((2,4-bis(3-(*m*-tolyl)ureido)phenyl)(3,5-di-*tert*-butyl-4-hydroxyphenyl)methyl)phosphonate 13b.** White solid, yield 80%, M.p.: 235-236°C. IR (KBr),  $\nu$ ,  $\text{cm}^{-1}$ : 775; 1019; 1050; 1201; 1560; 1669, 1732; 2957; 3306, 3645.  $^1\text{H}$  NMR (DMSO- $d_6$ , 400.13 MHz),  $\delta$ , ppm: 1.04 (t, 3H,  $\text{OCH}_2\text{CH}_3$ ,  $^3J_{\text{HH}} = 7.0$ ), 1.11 (t, 3H,  $\text{OCH}_2\text{CH}_3$ ,  $^3J_{\text{HH}} = 7.0$ ), 1.35 [s, 18H,  $\text{C}(\text{CH}_3)_3$ ], 2.21 (s, 3H,  $\text{NHC}_6\text{H}_4\text{CH}_3$ ), 2.29 (s, 3H,  $\text{NHC}_6\text{H}_4\text{CH}_3$ ), 3.80 - 4.00 (m, 4H,  $\text{OCH}_2\text{CH}_3$ ), 4.84 (d, 1H, CHP,  $^2J_{\text{PH}} = 26.9$ ), 6.81 (d, 1H,  $\text{NHC}_6\text{H}_4\text{CH}_3$ ,  $^3J_{\text{HH}} = 7.6$ ), 6.85 (d, 1H,  $\text{NHC}_6\text{H}_4\text{CH}_3$ ,  $^3J_{\text{HH}} = 7.6$ ), 6.89 (d, 1H,  $\text{C}_{m\text{-Ph}}$ ,  $^3J_{\text{HH}} = 8.5$ ), 6.92 (s, 1H, OH), 7.10-7.23 (m, 4H,  $\text{NHC}_6\text{H}_4\text{CH}_3$ ), 7.33 (s, 2H,  $\text{CHCC}(\text{CH}_3)_3$ ), 7.40 (s, 1H,  $\text{NHC}_6\text{H}_4\text{CH}_3$ ), 7.40 (d, 1H,  $\text{NHC}_6\text{H}_4\text{CH}_3$ ,  $^3J_{\text{HH}} = 6.6$ ), 7.46 (s, 1H,  $\text{NHC}_6\text{H}_4\text{CH}_3$ ), 7.52 (d, 1H,  $\text{NHC}_6\text{H}_4\text{CH}_3$ ,  $^3J_{\text{HH}} = 8.5$ ), 8.02 (d, 1H,  $\text{CH}_{m\text{-Ph}}$ ,  $^3J_{\text{HH}} = 8.6$ ), 8.53 (s, 1H,  $\text{CH}_{m\text{-Ph}}$ ), 8.95 (s, 1H, NH), 9.50 (s, 1H, NH), 9.72 (s, 1H, NH), 10.57 (s, 1H, NH).  $^{13}\text{C}\{^1\text{H}\}$  NMR (DMSO- $d_6$ , 100.57 MHz),  $\delta$ , ppm: 16.42 (d,  $\text{OCH}_2\text{CH}_3$ ,  $^3J_{\text{PC}} = 6.1$ ), 16.57 (d,  $\text{OCH}_2\text{CH}_3$ ,  $^3J_{\text{PC}} = 6.1$ ), 21.67 ( $\text{CH}_3$ ), 30.80 [ $\text{C}(\text{CH}_3)_3$ ], 35.07 [ $\text{C}(\text{CH}_3)_3$ ], 42.40 (d, CHP,  $^1J_{\text{PC}} = 140.4$ ), 62.45 (d,  $\text{OCH}_2\text{CH}_3$ ,  $^2J_{\text{PC}} = 7.1$ ), 62.84 (d,  $\text{OCH}_2\text{CH}_3$ ,  $^2J_{\text{PC}} = 7.1$ ), 114.05 ( $\text{CH}_{m\text{-Ph}}$ ), 114.82 ( $\text{CH}_{m\text{-Ph}}$ ), 115.83 ( $\text{NHC}_6\text{H}_4\text{CH}_3$ ), 119.17 ( $\text{NHC}_6\text{H}_4\text{CH}_3$ ), 123.01 ( $\text{NHC}_6\text{H}_4\text{CH}_3$ ), 123.99 ( $\text{C}_{m\text{-Ph}}$ ), 126.09 [ $\text{CHCC}(\text{CH}_3)_3$ ], 126.17 [ $\text{CHCC}(\text{CH}_3)_3$ ], 126.97 (d,  $\text{CCHP}$ ,  $^2J_{\text{PC}} = 4.0$ ), 129.07 ( $\text{NHC}_6\text{H}_4\text{CH}_3$ ), 129.43 ( $\text{CH}_{m\text{-Ph}}$ ), 136.76 (d,  $\text{C}_{m\text{-Ph}}$ ,  $^3J_{\text{PC}} = 4.0$ ), 138.12 ( $\text{C}_{m\text{-Ph}}$ ), 138.36 ( $\text{NHC}_6\text{H}_4\text{CH}_3$ ), 138.40 ( $\text{NHC}_6\text{H}_4\text{CH}_3$ ), 138.47 ( $\text{NHC}_6\text{H}_4\text{CH}_3$ ), 139.63 [ $\text{CC}(\text{CH}_3)_3$ ], 152.14 (C=O), 152.46 (C=O), 152.99 (COH).  $^{31}\text{P}$  NMR (DMSO- $d_6$ , 242.94 MHz),  $\delta$ , ppm: 25.80. Anal. Calcd for  $\text{C}_{41}\text{H}_{53}\text{N}_4\text{O}_6\text{P}$  (%): C, 67.56; H, 7.33; N, 7.69; P, 4.25. Found (%): C, 67.57; H, 7.35; N, 7.72; P, 4.26. HRMS (MALDI-TOF)  $m/z$  for  $\text{C}_{41}\text{H}_{53}\text{N}_4\text{O}_6\text{P}$ : calc. 728.4  $[\text{M}]^+$ , found: 729.4  $[\text{M}+\text{H}]^+$ , 751.4  $[\text{M}+\text{Na}]^+$ , 767.4  $[\text{M}+\text{K}]^+$ .

**Diphenyl((2,4-bis(3-(*m*-tolyl)ureido)phenyl)(3,5-di-*tert*-butyl-4-hydroxyphenyl)methyl)phosphonate 13d.** White solid, yield 88%, M.p.: 231-232°C. IR (KBr),  $\nu$ ,  $\text{cm}^{-1}$ : 817; 1028; 1259; 1576; 1600; 1638, 2966; 3335; 3469.  $^1\text{H}$  NMR (DMSO- $d_6$ , 400.13 MHz),  $\delta$ , ppm: 1.30 [s, 18H,  $\text{C}(\text{CH}_3)_3$ ], 2.28 (s, 3H,  $\text{CH}_3$ ), 2.29 (s, 3H,  $\text{CH}_3$ ), 5.20 (d, 3H,  $\text{OCH}_3$ ,  $^3J_{\text{PH}} = 27.2$ ), 6.65 (d, 2H,  $\text{OC}_6\text{H}_5$ ,  $^3J_{\text{HH}} = 8.0$ ), 6.80 (t, 1H,  $\text{CH}_{m\text{-Ph}}$ ,  $^3J_{\text{HH}} = 8.0$ ), 6.94 (s, 1H, OH), 6.95 (d, 2H,  $\text{OC}_6\text{H}_5$ ,  $^3J_{\text{HH}} = 8.0$ ), 7.10 (t, 1H,  $\text{OC}_6\text{H}_5$ ,  $^3J_{\text{HH}} = 8.0$ ), 7.15-7.25 (m, 7H,  $\text{OC}_6\text{H}_5$ ,  $\text{NHC}_6\text{H}_4\text{CH}_3$ ), 7.25-7.28 (m, 5H,  $\text{NHC}_6\text{H}_4\text{CH}_3$ ,  $\text{CH}_{m\text{-Ph}}$ ), 7.41 (s, 2H,  $\text{CHCC}(\text{CH}_3)_3$ ), 7.82 (dd, 1H,  $\text{CH}_{m\text{-Ph}}$ ,  $^3J_{\text{HH}} = 8.8$ , 1.6), 7.85 (s, 1H,  $\text{CH}_{m\text{-Ph}}$ ), 8.26 (s, 1H, NH), 8.52 (s, 1H, NH), 8.74 (s, 1H, NH), 8.78 (s, 1H, NH).  $^{13}\text{C}\{^1\text{H}\}$  NMR (DMSO- $d_6$ , 100.57 MHz),  $\delta$ , ppm: 21.66 ( $\text{CH}_3$ ), 21.70 ( $\text{CH}_3$ ), 30.67 [ $\text{C}(\text{CH}_3)_3$ ], 34.99 [ $\text{C}(\text{CH}_3)_3$ ], 43.74 (d, CHP,  $^1J_{\text{PC}} = 140.4$ ), 114.68 ( $\text{CH}_{m\text{-Ph}}$ ), 115.21 ( $\text{CH}_{m\text{-Ph}}$ ), 115.79 ( $\text{NHC}_6\text{H}_4\text{CH}_3$ ), 115.91 ( $\text{NHC}_6\text{H}_4\text{CH}_3$ ), 119.19 ( $\text{NHC}_6\text{H}_4\text{CH}_3$ ), 119.25 ( $\text{NHC}_6\text{H}_4\text{CH}_3$ ), 120.59 (d,  $\text{OC}_6\text{H}_5$ ,  $^3J_{\text{PC}} = 4.0$ ), 120.89 (d,  $\text{OC}_6\text{H}_5$ ,  $^3J_{\text{PC}} = 4.0$ ), 122.95 (d,  $\text{C}_{m\text{-Ph}}$ ,  $^2J_{\text{PC}} = 2.0$ ), 123.06 ( $\text{NHC}_6\text{H}_4\text{CH}_3$ ), 123.16 ( $\text{NHC}_6\text{H}_5\text{CH}_3$ ), 125.40 ( $\text{OC}_6\text{H}_5$ ), 125.68 ( $\text{OC}_6\text{H}_5$ ), 126.19 (d,  $\text{CCHP}$ ,  $^2J_{\text{PC}} = 4.0$ ), 126.52 [ $\text{CHCC}(\text{CH}_3)_3$ ], 126.60 [ $\text{CHCC}(\text{CH}_3)_3$ ], 129.10 ( $\text{NHC}_6\text{H}_4\text{CH}_3$ ), 129.68 (d,  $\text{CH}_{m\text{-Ph}}$ ,  $^3J_{\text{PC}} = 4.0$ ), 129.94 ( $\text{OC}_6\text{H}_5$ ), 130.24 ( $\text{OC}_6\text{H}_5$ ), 137.44 (d,  $\text{C}_{m\text{-Ph}}$ ,  $^3J_{\text{PC}} =$

12.1), 138.42 (NHC<sub>6</sub>H<sub>4</sub>CH<sub>3</sub>), 138.46 (NHC<sub>6</sub>H<sub>4</sub>CH<sub>3</sub>), 139.55 (C<sub>m-Ph</sub>), 139.75 [C(C(CH<sub>3</sub>)<sub>3</sub>)], 139.95 (NHC<sub>6</sub>H<sub>4</sub>CH<sub>3</sub>), 140.15 (NHC<sub>6</sub>H<sub>4</sub>CH<sub>3</sub>), 150.42 (d, OC<sub>6</sub>H<sub>5</sub>, <sup>2</sup>J<sub>PC</sub> = 11.1), 150.64 (d, OC<sub>6</sub>H<sub>5</sub>, <sup>2</sup>J<sub>PC</sub> = 10.1), 152.88 (C=O), 153.45 (C=O), 153.72 (COH). <sup>31</sup>P NMR (DMSO-*d*<sub>6</sub>, 161.90 MHz), δ, ppm: 20.23. Anal. Calcd for C<sub>49</sub>H<sub>53</sub>N<sub>4</sub>O<sub>6</sub>P (%): C, 71.34; H, 6.48; N, 6.79; P, 3.75. Found (%): C, 71.37; H, 6.51; N, 6.81; P, 3.78. HRMS (MALDI-TOF) m/z for C<sub>49</sub>H<sub>53</sub>N<sub>4</sub>O<sub>6</sub>P: calc. 824.4 [M]<sup>+</sup>, found: 825.7 [M+H]<sup>+</sup>, 863.6 [M+K]<sup>+</sup>.

**Dimethyl((2,4-bis-(3-(*p*-tolyl)ureido)phenyl)(3,5-di-*tert*-butyl-4-hydroxyphenyl)methyl)phosphonate 14a.** White solid, yield 78%, M.p.: 248-249°C. IR (KBr), ν, cm<sup>-1</sup>: 816; 1039; 1237; 1550; 1600; 1641, 2954; 3309; 3625. <sup>1</sup>H NMR (DMSO-*d*<sub>6</sub>, 400.13 MHz), δ, ppm: 1.32 [s, 18H, C(CH<sub>3</sub>)<sub>3</sub>], 2.24 (s, 3H, CH<sub>3</sub>), 2.25 (s, 3H, CH<sub>3</sub>), 3.50 (t, 6H, OCH<sub>3</sub>, <sup>3</sup>J<sub>PH</sub> = 10.2), 4.74 (d, 1H, CHP, <sup>2</sup>J<sub>PH</sub> = 26.4), 6.87 (s, 1H, OH), 7.08 (dd, 4H, NHC<sub>6</sub>H<sub>4</sub>CH<sub>3</sub>, <sup>3</sup>J<sub>HH</sub> = 8.1, 4.3), 7.24 (d, 1H, CH<sub>m-Ph</sub>, <sup>3</sup>J<sub>HH</sub> = 8.5, 2.4), 7.33 (m, 6H, CHCC(CH<sub>3</sub>)<sub>3</sub>, NHC<sub>6</sub>H<sub>4</sub>CH<sub>3</sub>), 7.64 (dd, 1H, CH<sub>m-Ph</sub>, <sup>3</sup>J<sub>HH</sub> = 8.6, 1.5), 7.75 (s, 1H, CH<sub>m-Ph</sub>), 8.12 (s, 1H, NH), 8.46 (s, 1H, NH), 8.64 (s, 1H, NH), 8.74 (s, 1H, NH). <sup>13</sup>C{<sup>1</sup>H} NMR (DMSO-*d*<sub>6</sub>, 100.57 MHz), δ, ppm: 20.79 (CH<sub>3</sub>), 30.82 [C(CH<sub>3</sub>)<sub>3</sub>], 35.02 [C(CH<sub>3</sub>)<sub>3</sub>], 42.54 (d, CHP, <sup>1</sup>J<sub>PC</sub> = 139.4), 53.33 (d, POCH<sub>3</sub>, <sup>2</sup>J<sub>PC</sub> = 7.1), 53.40 (d, POCH<sub>3</sub>, <sup>2</sup>J<sub>PC</sub> = 7.1), 114.25 (CH<sub>m-Ph</sub>); 114.66 (CH<sub>m-Ph</sub>), 118.63 (NHC<sub>6</sub>H<sub>4</sub>CH<sub>3</sub>), 118.75 (NHC<sub>6</sub>H<sub>4</sub>CH<sub>3</sub>), 123.32 (d, C<sub>m-Ph</sub>, <sup>2</sup>J<sub>PC</sub> = 3.0), 125.99 [CHCC(CH<sub>3</sub>)<sub>2</sub>], 126.07 [CHCC(CH<sub>3</sub>)<sub>2</sub>], 127.81 (d, CCHP, <sup>2</sup>J<sub>PC</sub> = 3.0), 129.62 (NHC<sub>6</sub>H<sub>4</sub>CH<sub>3</sub>), 129.81 (d, CH<sub>m-Ph</sub>, <sup>3</sup>J<sub>PC</sub> = 5.1), 131.00 (NHC<sub>6</sub>H<sub>4</sub>CH<sub>3</sub>), 131.12 (NHC<sub>6</sub>H<sub>4</sub>CH<sub>3</sub>), 137.23 (d, C<sub>m-Ph</sub>, <sup>3</sup>J<sub>PC</sub> = 11.1), 137.55 (NHC<sub>6</sub>H<sub>4</sub>CH<sub>3</sub>), 137.77 (NHC<sub>6</sub>H<sub>4</sub>CH<sub>3</sub>), 139.20 (C<sub>m-Ph</sub>), 139.48 [C(C(CH<sub>3</sub>)<sub>3</sub>)], 152.93 (C=O), 153.24 (COH), 153.39 (C=O). <sup>31</sup>P NMR (DMSO-*d*<sub>6</sub>, 161.90 MHz), δ, ppm: 28.77. Anal. Calcd for C<sub>39</sub>H<sub>49</sub>N<sub>4</sub>O<sub>6</sub>P (%): C, 66.84; H, 7.05; N, 7.99; P, 4.42. Found (%): C, 66.85; H, 7.07; N, 8.01; P, 4.45. HRMS (MALDI-TOF) m/z for C<sub>39</sub>H<sub>49</sub>N<sub>4</sub>O<sub>6</sub>P: calc. 700.3 [M]<sup>+</sup>, found: 723.5 [M+Na]<sup>+</sup>, 739.5 [M+K]<sup>+</sup>.

**Diethyl((2,4-bis-(3-(*p*-tolyl)ureido)phenyl)(3,5-di-*tert*-butyl-4-hydroxyphenyl)methyl)phosphonate 14b.** White solid, yield 68%, M.p.: 247-248°C. IR (KBr), ν, cm<sup>-1</sup>: 815; 1027; 1053; 1224; 1548; 1603; 1642, 2960; 3325; 3620. <sup>1</sup>H NMR (DMSO-*d*<sub>6</sub>, 600.13 MHz), δ, ppm: 1.01 (t, 3H, OCH<sub>2</sub>CH<sub>3</sub>, <sup>3</sup>J<sub>HH</sub> = 7.0), 1.10 (t, 3H, OCH<sub>2</sub>CH<sub>3</sub>, <sup>3</sup>J<sub>HH</sub> = 7.0), 1.33 [s, 18H, CH(CH<sub>3</sub>)<sub>2</sub>], 2.24 (s, 3H, CH<sub>3</sub>), 2.25 (s, 3H, CH<sub>3</sub>), 3.78 (m, 1H, OCH<sub>2</sub>CH<sub>3</sub>), 3.84 (m, 1H, OCH<sub>2</sub>CH<sub>3</sub>), 3.90 (m, 2H, OCH<sub>2</sub>CH<sub>3</sub>), 4.68 (d, 1H, CHP, <sup>2</sup>J<sub>PH</sub> = 26.5), 6.84 (s, 1H, OH), 7.08 (t, 4H, NHC<sub>6</sub>H<sub>4</sub>CH<sub>3</sub>, <sup>3</sup>J<sub>HH</sub> = 8.0), 7.25 (d, 1H, CH<sub>m-Ph</sub>, <sup>3</sup>J<sub>HH</sub> = 7.0), 7.31 (s, 2H, CHCC(CH<sub>3</sub>)<sub>3</sub>), 7.33 (t, 4H, NHC<sub>6</sub>H<sub>4</sub>CH<sub>3</sub>, <sup>3</sup>J<sub>HH</sub> = 8.0), 8.00 (d, 1H, CH<sub>m-Ph</sub>, <sup>3</sup>J<sub>HH</sub> = 8.6), 7.78 (s, 1H, CH<sub>m-Ph</sub>), 8.12 (s, 1H, NH), 8.44 (s, 1H, NH), 8.64 (s, 1H, NH), 8.77 (s, 1H, NH). <sup>13</sup>C{<sup>1</sup>H} NMR (DMSO-*d*<sub>6</sub>, 100.57 MHz), δ, ppm: 16.97 (d, OCH<sub>2</sub>CH<sub>3</sub>, <sup>3</sup>J<sub>PC</sub> = 5.1), 17.12 (d, OCH<sub>2</sub>CH<sub>3</sub>, <sup>3</sup>J<sub>PC</sub> = 5.1), 21.32 (CH<sub>3</sub>), 31.34 [C(CH<sub>3</sub>)<sub>3</sub>], 35.54 [C(CH<sub>3</sub>)<sub>3</sub>], 43.66 (d, CHP, <sup>1</sup>J<sub>PC</sub> = 140.4), 62.80 (d, OCH<sub>2</sub>CH<sub>3</sub>, <sup>2</sup>J<sub>PC</sub> = 6.1), 63.05 (d, OCH<sub>2</sub>CH<sub>3</sub>, <sup>2</sup>J<sub>PC</sub> = 6.1), 114.48 (CH<sub>m-Ph</sub>); 114.78 (CH<sub>m-Ph</sub>), 119.13 (NHC<sub>6</sub>H<sub>4</sub>CH<sub>3</sub>), 119.27 (NHC<sub>6</sub>H<sub>4</sub>CH<sub>3</sub>), 123.74 (C<sub>m-Ph</sub>), 126.63 [CHCC(CH<sub>3</sub>)<sub>2</sub>], 126.70 [CHCC(CH<sub>3</sub>)<sub>2</sub>], 128.47 (CCHP), 130.14 (NHC<sub>6</sub>H<sub>4</sub>CH<sub>3</sub>), 130.21 (d, CH<sub>m-Ph</sub>, <sup>3</sup>J<sub>PC</sub> = 5.1), 131.50 (NHC<sub>6</sub>H<sub>4</sub>CH<sub>3</sub>), 131.62 (NHC<sub>6</sub>H<sub>4</sub>CH<sub>3</sub>), 137.85 (d, C<sub>m-Ph</sub>, <sup>3</sup>J<sub>PC</sub> = 10.1), 138.07 (NHC<sub>6</sub>H<sub>4</sub>CH<sub>3</sub>), 138.30 (NHC<sub>6</sub>H<sub>4</sub>CH<sub>3</sub>), 139.60 (C<sub>m-Ph</sub>), 139.91 [C(C(CH<sub>3</sub>)<sub>3</sub>)], 153.44 (C=O), 153.67 (COH), 153.83 (C=O). <sup>31</sup>P NMR (DMSO-*d*<sub>6</sub>, 242.94 MHz), δ, ppm: 26.75. Anal. Calcd for C<sub>41</sub>H<sub>53</sub>N<sub>4</sub>O<sub>6</sub>P (%): C, 67.56; H, 7.33; N, 7.69; P, 4.25. Found (%): C, 67.59; H, 7.35; N, 7.72; P, 4.27. HRMS (MALDI-TOF) m/z for C<sub>41</sub>H<sub>53</sub>N<sub>4</sub>O<sub>6</sub>P: calc. 728.4 [M]<sup>+</sup>, found: 751.3 [M+Na]<sup>+</sup>.

**Diphenyl((2,4-bis-(3-(*p*-tolyl)ureido)phenyl)(3,5-di-*tert*-butyl-4-hydroxyphenyl)methyl)phosphonate 14d.** White solid, yield 75%, M.p.: 231-232°C. IR (KBr), ν, cm<sup>-1</sup>: 815; 1026; 1208; 1550; 1603; 1642, 2956; 3323; 3627. <sup>1</sup>H NMR (DMSO-*d*<sub>6</sub>, 400.13 MHz), δ, ppm: 1.29 [s, 18H, C(CH<sub>3</sub>)<sub>3</sub>], 2.25 (s, 3H, CH<sub>3</sub>), 2.26 (s, 3H, CH<sub>3</sub>), 5.20 (d, 1H, CHP, <sup>2</sup>J<sub>PH</sub> = 27.3), 6.64 (d, 2H, OC<sub>6</sub>H<sub>5</sub>, <sup>3</sup>J<sub>HH</sub> = 8.3), 6.95 (d, 1H, OC<sub>6</sub>H<sub>5</sub>, <sup>3</sup>J<sub>HH</sub> = 7.2), 6.95 (s, 1H, OH), 7.09 (m, 5H, OC<sub>6</sub>H<sub>5</sub>,

NHC<sub>6</sub>H<sub>4</sub>CH<sub>3</sub>), 7.19 (m, 3H, OC<sub>6</sub>H<sub>5</sub>), 7.25-7.37 (m, 7H, OC<sub>6</sub>H<sub>5</sub>, NHC<sub>6</sub>H<sub>4</sub>CH<sub>3</sub>, CH<sub>m-Ph</sub>), 7.40 (s, 2H, CHCC(CH<sub>3</sub>)<sub>3</sub>), 7.80 (d, 1H, CH<sub>m-Ph</sub>, <sup>3</sup>J<sub>HH</sub> = 9.4), 7.83 (s, 1H, CH<sub>m-Ph</sub>), 8.23 (s, 1H, NH), 8.49 (s, 1H, NH), 8.71 (s, 1H, NH), 8.75 (s, 1H, NH). <sup>13</sup>C{<sup>1</sup>H} NMR (DMSO-*d*<sub>6</sub>, 100.57 MHz),  $\delta$ , ppm: 21.33 (CH<sub>3</sub>), 31.21 [C(CH<sub>3</sub>)<sub>3</sub>], 35.53 [C(CH<sub>3</sub>)<sub>3</sub>], 44.22 (d, CHP, <sup>1</sup>J<sub>PC</sub> = 140.8), 114.95 (CH<sub>m-Ph</sub>), 115.38 (CH<sub>m-Ph</sub>), 119.18 (NHC<sub>6</sub>H<sub>4</sub>CH<sub>3</sub>), 119.30 (NHC<sub>6</sub>H<sub>4</sub>CH<sub>3</sub>), 121.13 (d, OC<sub>6</sub>H<sub>5</sub>, <sup>3</sup>J<sub>PC</sub> = 4.0), 121.44 (d, OC<sub>6</sub>H<sub>5</sub>, <sup>3</sup>J<sub>PC</sub> = 4.0), 123.06 (C<sub>m-Ph</sub>), 125.89 (OC<sub>6</sub>H<sub>5</sub>), 126.17 (OC<sub>6</sub>H<sub>5</sub>), 126.77 (d, CCHP, <sup>3</sup>J<sub>PC</sub> = 4.0), 127.01 [CHCC(CH<sub>3</sub>)<sub>2</sub>], 127.10 [CHCC(CH<sub>3</sub>)<sub>2</sub>], 130.16 (NHC<sub>6</sub>H<sub>4</sub>CH<sub>3</sub>), 130.21 (d, CH<sub>m-Ph</sub>, <sup>3</sup>J<sub>PC</sub> = 5.1), 130.44 (OC<sub>6</sub>H<sub>5</sub>), 130.75 (OC<sub>6</sub>H<sub>5</sub>), 131.59 (NHC<sub>6</sub>H<sub>4</sub>CH<sub>3</sub>), 131.68 (NHC<sub>6</sub>H<sub>4</sub>CH<sub>3</sub>), 138.03 (NHC<sub>6</sub>H<sub>4</sub>CH<sub>3</sub>), 138.05 (d, C<sub>m-Ph</sub>, <sup>3</sup>J<sub>PC</sub> = 12.1), 138.23 (NHC<sub>6</sub>H<sub>4</sub>CH<sub>3</sub>), 140.14 (C<sub>m-Ph</sub>), 140.24 [CC(CH<sub>3</sub>)<sub>3</sub>], 150.96 (d, OC<sub>6</sub>H<sub>5</sub>, <sup>3</sup>J<sub>PC</sub> = 10.1), 151.29 (d, OC<sub>6</sub>H<sub>5</sub>, <sup>3</sup>J<sub>PC</sub> = 10.1), 153.43 (C=O), 153.94 (C=O), 154.22 (COH). <sup>31</sup>P NMR (DMSO-*d*<sub>6</sub>, 161.90 MHz),  $\delta$ , ppm: 20.26. Anal. Calcd for C<sub>49</sub>H<sub>53</sub>N<sub>4</sub>O<sub>6</sub>P (%): C, 71.34; H, 6.48; N, 6.79; P, 3.75. Found (%): C, 71.37; H, 6.48; N, 6.81; P, 3.76. HRMS (MALDI-TOF) *m/z* for C<sub>49</sub>H<sub>53</sub>N<sub>4</sub>O<sub>6</sub>P: calc. 824.4 [M]<sup>+</sup>, found: 825.7 [M+H]<sup>+</sup>, 863.8 [M+K]<sup>+</sup>.

**Dimethyl((2,4-bis-(3-(4-methoxyphenyl)ureido)phenyl)(3,5-di-*tert*-butyl-4-hydroxyphenyl)methyl)phosphonate 15a.** White solid, yield 88%, M.p.: 234-235°C. IR (KBr),  $\nu$ , cm<sup>-1</sup>: 830; 1034; 1123; 1241; 1555; 1605; 1640; 2954; 3324; 3620. <sup>1</sup>H NMR (DMSO-*d*<sub>6</sub>, 400.13 MHz),  $\delta$ , ppm: 1.33 [s, 18H, C(CH<sub>3</sub>)<sub>3</sub>], 3.49 (d, 3H, OCH<sub>3</sub>, <sup>3</sup>J<sub>PH</sub> = 10.8), 3.51 (d, 3H, OCH<sub>3</sub>, <sup>3</sup>J<sub>PH</sub> = 10.8), 3.71 (s, 3H, OCH<sub>3</sub>), 3.72 (s, 3H, OCH<sub>3</sub>), 4.74 (d, 1H, CHP, <sup>2</sup>J<sub>PH</sub> = 26.5), 6.86 (dd, 4H, NHC<sub>6</sub>H<sub>4</sub>OCH<sub>3</sub>, <sup>3</sup>J<sub>HH</sub> = 8.6), 7.24 (dd, 1H, CH<sub>m-Ph</sub>, <sup>3</sup>J<sub>HH</sub> = 8.6, 2.0), 7.30 (s, 2H, CHCC(CH<sub>3</sub>)<sub>3</sub>), 7.35 (dd, 4H, NHC<sub>6</sub>H<sub>4</sub>OCH<sub>3</sub>, <sup>3</sup>J<sub>HH</sub> = 8.8, 6.5), 7.63 (d, 1H, CH<sub>m-Ph</sub>, <sup>3</sup>J<sub>HH</sub> = 9.1), 7.74 (s, 1H, CH<sub>m-Ph</sub>), 8.08 (s, 1H, NH), 8.37 (s, 1H, NH), 8.61 (s, 1H, NH), 8.66 (s, 1H, NH). <sup>13</sup>C{<sup>1</sup>H} NMR (DMSO-*d*<sub>6</sub>, 100.57 MHz),  $\delta$ , ppm: 31.35 [C(CH<sub>3</sub>)<sub>3</sub>], 35.54 [C(CH<sub>3</sub>)<sub>3</sub>], 43.13 (d, CHP, <sup>1</sup>J<sub>PC</sub> = 139.4), 56.17 (OCH<sub>3</sub>), 53.86 (d, POCH<sub>3</sub>, <sup>2</sup>J<sub>PC</sub> = 7.1), 53.93 (d, POCH<sub>3</sub>, <sup>2</sup>J<sub>PC</sub> = 7.1), 114.70 (CH<sub>m-Ph</sub>), 114.99 (NHC<sub>6</sub>H<sub>4</sub>OCH<sub>3</sub>), 115.14 (CH<sub>m-Ph</sub>), 120.93 (NHC<sub>6</sub>H<sub>4</sub>OCH<sub>3</sub>), 121.00 (NHC<sub>6</sub>H<sub>4</sub>OCH<sub>3</sub>), 123.71 (C<sub>m-Ph</sub>), 126.49 [CHCC(CH<sub>3</sub>)<sub>3</sub>], 126.57 [CHCC(CH<sub>3</sub>)<sub>3</sub>], 128.35 (d, CCHP, <sup>3</sup>J<sub>PC</sub> = 3.0), 130.32 (CH<sub>m-Ph</sub>), 133.97 (NHC<sub>6</sub>H<sub>4</sub>OCH<sub>3</sub>), 133.62 (NHC<sub>6</sub>H<sub>4</sub>OCH<sub>3</sub>), 133.80 (d, C<sub>m-Ph</sub>, <sup>3</sup>J<sub>PC</sub> = 9.1), 139.78 (C<sub>m-Ph</sub>), 139.98 [CC(CH<sub>3</sub>)<sub>3</sub>], 153.60 (C=O), 153.73 (C=O), 155.36 (NHC<sub>6</sub>H<sub>4</sub>OCH<sub>3</sub>), 155.39 (NHC<sub>6</sub>H<sub>4</sub>OCH<sub>3</sub>), 155.48 (s, COH). <sup>31</sup>P NMR (DMSO-*d*<sub>6</sub>, 161.90 MHz),  $\delta$ , ppm: 28.81. HRMS (MALDI-TOF) *m/z* for C<sub>39</sub>H<sub>49</sub>N<sub>4</sub>O<sub>8</sub>P: calc. 723.3 [M]<sup>+</sup>, found: 755.4 [M+Na]<sup>+</sup>.

**Diethyl((2,4-bis-(3-(4-methoxyphenyl)ureido)phenyl)(3,5-di-*tert*-butyl-4-hydroxyphenyl)methyl)phosphonate 15b.** White solid, yield 90%, M.p.: 239-240°C. IR (KBr),  $\nu$ , cm<sup>-1</sup>: 829; 1030; 1179; 1553; 1606; 1640; 2957; 3321; 3627. <sup>1</sup>H NMR (DMSO-*d*<sub>6</sub>, 600.13 MHz),  $\delta$ , ppm: 1.01 (t, 3H, OCH<sub>2</sub>CH<sub>3</sub>, <sup>3</sup>J<sub>HH</sub> = 6.8), 1.07 (t, 3H, OCH<sub>2</sub>CH<sub>3</sub>, <sup>3</sup>J<sub>HH</sub> = 7.1), 1.33 [s, 18H, CH(CH<sub>3</sub>)<sub>2</sub>], 3.71 (s, 3H, OCH<sub>3</sub>), 3.72 (s, 3H, OCH<sub>3</sub>), 3.77 (m, 1H, OCH<sub>2</sub>CH<sub>3</sub>), 3.83 (m, 1H, OCH<sub>2</sub>CH<sub>3</sub>), 3.90 (m, 2H, OCH<sub>2</sub>CH<sub>3</sub>), 4.68 (d, 1H, CHP, <sup>2</sup>J<sub>PH</sub> = 27.4), 6.85 (s, 1H, OH), 6.86 (t, 4H, NHC<sub>6</sub>H<sub>4</sub>OCH<sub>3</sub>, <sup>3</sup>J<sub>HH</sub> = 8.4), 7.24 (d, 1H, CH<sub>m-Ph</sub>, <sup>3</sup>J<sub>HH</sub> = 8.0), 7.30 (s, 2H, CHCC(CH<sub>3</sub>)<sub>3</sub>), 7.35 (t, 4H, NHC<sub>6</sub>H<sub>4</sub>OCH<sub>3</sub>, <sup>3</sup>J<sub>HH</sub> = 8.4), 7.64 (d, 1H, CH<sub>m-Ph</sub>, <sup>3</sup>J<sub>HH</sub> = 7.7), 7.76 (s, 1H, CH<sub>m-Ph</sub>), 8.08 (s, 1H, NH), 8.36 (s, 1H, NH), 8.59 (s, 1H, NH), 8.69 (s, 1H, NH). <sup>13</sup>C{<sup>1</sup>H} NMR (DMSO-*d*<sub>6</sub>, 100.57 MHz),  $\delta$ , ppm: 16.44 (d, OCH<sub>2</sub>CH<sub>3</sub>, <sup>3</sup>J<sub>PC</sub> = 5.1), 16.59 (d, OCH<sub>2</sub>CH<sub>3</sub>, <sup>3</sup>J<sub>PC</sub> = 5.1), 30.81 [C(CH<sub>3</sub>)<sub>3</sub>], 35.01 [C(CH<sub>3</sub>)<sub>3</sub>], 43.13 (d, CHP, <sup>1</sup>J<sub>PC</sub> = 141.4), 55.64 (OCH<sub>3</sub>), 62.27 (d, OCH<sub>2</sub>CH<sub>3</sub>, <sup>2</sup>J<sub>PC</sub> = 7.1), 62.51 (d, OCH<sub>2</sub>CH<sub>3</sub>, <sup>2</sup>J<sub>PC</sub> = 7.1), 113.88 (CH<sub>m-Ph</sub>), 114.20 (CH<sub>m-Ph</sub>), 114.47 (NHC<sub>6</sub>H<sub>4</sub>OCH<sub>3</sub>), 120.22 (NHC<sub>6</sub>H<sub>4</sub>OCH<sub>3</sub>), 120.47 (NHC<sub>6</sub>H<sub>4</sub>OCH<sub>3</sub>), 123.04 (C<sub>m-Ph</sub>), 126.10 [CHCC(CH<sub>3</sub>)<sub>3</sub>], 126.18 [CHCC(CH<sub>3</sub>)<sub>3</sub>], 127.99 (CCHP), 129.75 (CH<sub>m-Ph</sub>), 137.41 (d, C<sub>m-Ph</sub>, <sup>3</sup>J<sub>PC</sub> = 11.1), 139.16 (C<sub>m-Ph</sub>), 139.38 [CC(CH<sub>3</sub>)<sub>3</sub>], 140.12 (NHC<sub>6</sub>H<sub>4</sub>OCH<sub>3</sub>), 140.35 (NHC<sub>6</sub>H<sub>4</sub>OCH<sub>3</sub>), 153.08 (C=O), 153.15 (C=O), 153.45 (s, COH), 154.86 (NHC<sub>6</sub>H<sub>4</sub>OCH<sub>3</sub>), 154.96 (NHC<sub>6</sub>H<sub>4</sub>OCH<sub>3</sub>). <sup>31</sup>P NMR

(DMSO-*d*<sub>6</sub>, 242.94 MHz),  $\delta$ , ppm: 26.78. HRMS (MALDI-TOF) *m/z* for C<sub>41</sub>H<sub>53</sub>N<sub>4</sub>O<sub>8</sub>P: calc. 760.4 [M]<sup>+</sup>, found: 783.4 [M+Na]<sup>+</sup>.

**Diphenyl((2,4-bis-(3-(4-methoxyphenyl)ureido)phenyl)(3,5-di-*tert*-butyl-4-hydroxyphenyl)methyl)phosphonate 15d.** White solid, yield 88%, M.p.: 195-196°C. IR (KBr),  $\nu$ , cm<sup>-1</sup>: 829; 1183; 1221; 1242; 1554; 1607, 2955; 3323; 3620. <sup>1</sup>H NMR (DMSO-*d*<sub>6</sub>, 400.13 MHz),  $\delta$ , ppm: 1.30 [s, 18H, C(CH<sub>3</sub>)<sub>3</sub>], 3.72 (s, 3H, OCH<sub>3</sub>), 3.73 (s, 3H, OCH<sub>3</sub>), 5.20 (d, 1H, CHP, <sup>2</sup>*J*<sub>PH</sub> = 27.5), 6.64 (d, 2H, OC<sub>6</sub>H<sub>5</sub>, <sup>3</sup>*J*<sub>HH</sub> = 8.1), 6.87 (dd, 4H, OC<sub>6</sub>H<sub>5</sub>, <sup>3</sup>*J*<sub>HH</sub> = 8.8, 6.0), 6.95 (s, 1H, OH), 6.96 (d, 1H, OC<sub>6</sub>H<sub>5</sub>, <sup>3</sup>*J*<sub>HH</sub> = 8.1), 7.25-7.45 (m, 7H, OC<sub>6</sub>H<sub>5</sub>, NHC<sub>6</sub>H<sub>4</sub>OCH<sub>3</sub>, CH<sub>*m*-Ph</sub>), 7.40 (s, 2H, CHCC(CH<sub>3</sub>)<sub>3</sub>), 7.80 (dd, 1H, CH<sub>*m*-Ph</sub>, <sup>3</sup>*J*<sub>HH</sub> = 8.0), 7.81 (s, 1H, CH<sub>*m*-Ph</sub>), 8.19 (s, 1H, NH), 8.41 (s, 1H, NH), 8.67 (s, 2H, NH). <sup>13</sup>C{<sup>1</sup>H} NMR (DMSO-*d*<sub>6</sub>, 100.57 MHz),  $\delta$ , ppm: 31.22 [C(CH<sub>3</sub>)<sub>3</sub>], 35.54 [C(CH<sub>3</sub>)<sub>3</sub>], 44.23 (d, CHP, <sup>1</sup>*J*<sub>PC</sub> = 141.1), 56.18 (OCH<sub>3</sub>), 114.88 (CH<sub>*m*-Ph</sub>); 115.02 (NHC<sub>6</sub>H<sub>4</sub>OCH<sub>3</sub>), 115.36 (CH<sub>*m*-Ph</sub>), 120.84 (NHC<sub>6</sub>H<sub>4</sub>OCH<sub>3</sub>), 120.05 (NHC<sub>6</sub>H<sub>4</sub>OCH<sub>3</sub>), 121.15 (d, OC<sub>6</sub>H<sub>5</sub>, <sup>3</sup>*J*<sub>PC</sub> = 4.0), 121.46 (d, OC<sub>6</sub>H<sub>5</sub>, <sup>3</sup>*J*<sub>PC</sub> = 3.0), 122.94 (d, C<sub>*m*-Ph</sub>, <sup>3</sup>*J*<sub>PC</sub> = 1.0), 125.90 (OC<sub>6</sub>H<sub>5</sub>), 126.18 (OC<sub>6</sub>H<sub>5</sub>), 126.81 (d, CCHP, <sup>3</sup>*J*<sub>PC</sub> = 4.0), 127.03 [CHCC(CH<sub>3</sub>)<sub>2</sub>], 127.12 [CHCC(CH<sub>3</sub>)<sub>2</sub>], 130.19 (d, CH<sub>*m*-Ph</sub>, <sup>3</sup>*J*<sub>PC</sub> = 4.0), 130.46 (OC<sub>6</sub>H<sub>5</sub>), 130.76 (OC<sub>6</sub>H<sub>5</sub>), 133.66 (NHC<sub>6</sub>H<sub>4</sub>OCH<sub>3</sub>), 133.89 (NHC<sub>6</sub>H<sub>4</sub>OCH<sub>3</sub>), 138.15 (d, C<sub>*m*-Ph</sub>, <sup>3</sup>*J*<sub>PC</sub> = 12.1), 140.23 (C<sub>*m*-Ph</sub>), 140.25 [CC(CH<sub>3</sub>)<sub>3</sub>], 150.98 (d, OC<sub>6</sub>H<sub>5</sub>, <sup>3</sup>*J*<sub>PC</sub> = 10.1), 151.33 (d, OC<sub>6</sub>H<sub>5</sub>, <sup>3</sup>*J*<sub>PC</sub> = 10.1), 153.61 (C=O), 154.11 (C=O), 154.25 (COH). 155.46 (NHC<sub>6</sub>H<sub>4</sub>OCH<sub>3</sub>), 155.54 (NHC<sub>6</sub>H<sub>4</sub>OCH<sub>3</sub>). <sup>31</sup>P NMR (DMSO-*d*<sub>6</sub>, 161.90 MHz),  $\delta$ , ppm: 20.29. HRMS (MALDI-TOF) *m/z* for C<sub>49</sub>H<sub>53</sub>N<sub>4</sub>O<sub>8</sub>P: calc. 856.4 [M]<sup>+</sup>, found: 856.6 [M+H]<sup>+</sup>; 879.6 [M+Na]<sup>+</sup>.

**Dimethyl((2,4-bis-(3-(*p*-chlorophenyl)ureido)phenyl)(3,5-di-*tert*-butyl-4-hydroxyphenyl)methyl)phosphonate 16a.** White solid, yield 85%, M.p.: 249-250°C. IR (KBr),  $\nu$ , cm<sup>-1</sup>: 829; 1039; 1226; 1550; 1697, 1639; 2955; 3323; 3631. <sup>1</sup>H NMR (DMSO-*d*<sub>6</sub>, 600.13 MHz),  $\delta$ , ppm: 1.32 [s, 18H, C(CH<sub>3</sub>)<sub>3</sub>], 3.51 (t, 6H, OCH<sub>3</sub>, <sup>3</sup>*J*<sub>PH</sub> = 10.1), 4.74 (d, 1H, CHP, <sup>2</sup>*J*<sub>PH</sub> = 26.3), 6.87 (s, 1H, OH), 7.25 (dd, 1H, CH<sub>*m*-Ph</sub>, <sup>3</sup>*J*<sub>HH</sub> = 8.6, <sup>4</sup>*J*<sub>HH</sub> = 2.3), 7.29 (s, 2H, CHCC(CH<sub>3</sub>)<sub>3</sub>), 7.31 (d, 2H, NHC<sub>6</sub>H<sub>4</sub>Cl, <sup>3</sup>*J*<sub>HH</sub> = 3.5), 7.33 (d, 2H, NHC<sub>6</sub>H<sub>4</sub>Cl, <sup>3</sup>*J*<sub>HH</sub> = 3.4), 7.47 (d, 2H, NHC<sub>6</sub>H<sub>4</sub>Cl, <sup>3</sup>*J*<sub>HH</sub> = 3.9), 7.49 (d, 2H, NHC<sub>6</sub>H<sub>4</sub>Cl, <sup>3</sup>*J*<sub>HH</sub> = 3.7), 7.65 (dd, 1H, CH<sub>*m*-Ph</sub>, <sup>3</sup>*J*<sub>HH</sub> = 8.6), 7.74 (s, 1H, CH<sub>*m*-Ph</sub>), 8.24 (s, 1H, NH), 8.73 (s, 1H, NH), 8.75 (s, 1H, NH), 8.99 (s, 1H, NH). <sup>13</sup>C{<sup>1</sup>H} NMR (DMSO-*d*<sub>6</sub>, 100.57 MHz),  $\delta$ , ppm: 31.33 [C(CH<sub>3</sub>)<sub>3</sub>], 35.53 [C(CH<sub>3</sub>)<sub>3</sub>], 43.21 (d, CHP, <sup>1</sup>*J*<sub>PC</sub> = 139.4), 53.87 (d, POCH<sub>3</sub>, <sup>2</sup>*J*<sub>PC</sub> = 7.1), 53.97 (d, POCH<sub>3</sub>, <sup>2</sup>*J*<sub>PC</sub> = 7.1), 115.33 (CH<sub>*m*-Ph</sub>), 115.83 (CH<sub>*m*-Ph</sub>), 120.55 (NHC<sub>6</sub>H<sub>4</sub>Cl), 120.71 (NHC<sub>6</sub>H<sub>4</sub>Cl), 124.59 (d, C<sub>*m*-Ph</sub>, <sup>3</sup>*J*<sub>PC</sub> = 3.0), 126.24 (NHC<sub>6</sub>H<sub>4</sub>Cl), 126.37 (NHC<sub>6</sub>H<sub>4</sub>Cl), 126.48 [CHCC(CH<sub>3</sub>)<sub>3</sub>], 126.56 [CHCC(CH<sub>3</sub>)<sub>3</sub>], 128.24 (d, CCHP, <sup>3</sup>*J*<sub>PC</sub> = 4.0), 129.58 (NHC<sub>6</sub>H<sub>4</sub>Cl), 130.39 (d, CH<sub>*m*-Ph</sub>, <sup>3</sup>*J*<sub>PC</sub> = 6.1), 137.46 (d, C<sub>*m*-Ph</sub>, <sup>3</sup>*J*<sub>PC</sub> = 11.1), 139.45 (C<sub>*m*-Ph</sub>), 139.64 (NHC<sub>6</sub>H<sub>4</sub>Cl), 139.88 (NHC<sub>6</sub>H<sub>4</sub>Cl), 140.00 [CC(CH<sub>3</sub>)<sub>3</sub>], 153.29 (C=O), 153.76 (s, COH), 153.82 (C=O). <sup>31</sup>P NMR (DMSO-*d*<sub>6</sub>, 242.94 MHz),  $\delta$ , ppm: 28.73. Anal. Calcd for C<sub>37</sub>H<sub>43</sub>Cl<sub>2</sub>N<sub>4</sub>O<sub>6</sub>P (%): C, 59.92; H, 5.84; Cl, 9.56; N, 7.55; P, 4.18. Found (%): C, 59.94; H, 5.87; Cl, 9.58; N, 7.57; P, 4.20. HRMS (MALDI-TOF) *m/z* for C<sub>37</sub>H<sub>43</sub>Cl<sub>2</sub>N<sub>4</sub>O<sub>6</sub>P: calc. 740.2 [M]<sup>+</sup>, found: 780.4 [M+K]<sup>+</sup>.

**Diethyl((2,4-bis-(3-(*p*-chlorophenyl)ureido)phenyl)(3,5-di-*tert*-butyl-4-hydroxyphenyl)methyl)phosphonate 16b.** White solid, yield 75%, M.p.: 240-241°C. IR (KBr),  $\nu$ , cm<sup>-1</sup>: 828; 1026; 1055; 1221; 1548; 1698, 1641; 2962; 3317; 3631. <sup>1</sup>H NMR (DMSO-*d*<sub>6</sub>, 400.13 MHz),  $\delta$ , ppm: 1.00 (t, 3H, OCH<sub>2</sub>CH<sub>3</sub>, <sup>3</sup>*J*<sub>HH</sub> = 7.0), 1.06 (t, 3H, OCH<sub>2</sub>CH<sub>3</sub>, <sup>3</sup>*J*<sub>HH</sub> = 7.0), 1.31 [s, 18H, CH(CH<sub>3</sub>)<sub>2</sub>], 3.77 (m, 1H, OCH<sub>2</sub>CH<sub>3</sub>), 3.83 (m, 1H, OCH<sub>2</sub>CH<sub>3</sub>), 3.90 (m, 2H, OCH<sub>2</sub>CH<sub>3</sub>), 4.68 (d, 1H, CHP, <sup>2</sup>*J*<sub>PH</sub> = 26.5), 6.84 (s, 1H, OH), 7.24 (s, 1H, CH<sub>*m*-Ph</sub>, <sup>3</sup>*J*<sub>HH</sub> = 8.6, 2.1), 7.29 (s, 2H, CHCC(CH<sub>3</sub>)<sub>3</sub>), 7.30 (d, 2H, NHC<sub>6</sub>H<sub>4</sub>Cl, <sup>3</sup>*J*<sub>HH</sub> = 3.6), 7.33 (d, 2H, NHC<sub>6</sub>H<sub>4</sub>Cl, <sup>3</sup>*J*<sub>HH</sub> = 3.6), 7.47 (d, 2H, NHC<sub>6</sub>H<sub>4</sub>Cl, <sup>3</sup>*J*<sub>HH</sub> = 3.3), 7.49 (d, 2H, NHC<sub>6</sub>H<sub>4</sub>Cl, <sup>3</sup>*J*<sub>HH</sub> = 3.3), 7.66 (d, 1H, CH<sub>*m*-Ph</sub>, <sup>3</sup>*J*<sub>HH</sub> = 8.6), 7.76 (s, 1H, CH<sub>*m*-Ph</sub>), 8.23 (s, 1H, NH), 8.72 (s, 1H, NH), 8.74 (s, 1H, NH), 9.01 (s, 1H, NH). <sup>13</sup>C{<sup>1</sup>H} NMR (DMSO-*d*<sub>6</sub>, 100.57 MHz),  $\delta$ , ppm:

16.43 (d, OCH<sub>2</sub>CH<sub>3</sub>, <sup>3</sup>J<sub>PC</sub> = 6.1), 16.58 (d, OCH<sub>2</sub>CH<sub>3</sub>, <sup>3</sup>J<sub>PC</sub> = 6.1), 30.78 [C(CH<sub>3</sub>)<sub>3</sub>], 35.00 [C(CH<sub>3</sub>)<sub>3</sub>], 43.28 (d, CHP, <sup>1</sup>J<sub>PC</sub> = 139.4), 62.29 (d, OCH<sub>2</sub>CH<sub>3</sub>, <sup>2</sup>J<sub>PC</sub> = 7.1), 62.56 (d, OCH<sub>2</sub>CH<sub>3</sub>, <sup>2</sup>J<sub>PC</sub> = 7.1), 114.51 (CH<sub>m-Ph</sub>), 114.90 (CH<sub>m-Ph</sub>), 119.99 (NHC<sub>6</sub>H<sub>5</sub>Cl), 120.18 (NHC<sub>6</sub>H<sub>4</sub>Cl), 123.92 (C<sub>m-Ph</sub>), 125.69 (NHC<sub>6</sub>H<sub>4</sub>Cl), 125.82 (NHC<sub>6</sub>H<sub>4</sub>Cl), 126.08 [CHCC(CH<sub>3</sub>)<sub>3</sub>], 126.16 [CHCC(CH<sub>3</sub>)<sub>3</sub>], 127.86 (d, CCHP, <sup>2</sup>J<sub>PC</sub> = 4.0), 129.06 (NHC<sub>6</sub>H<sub>4</sub>Cl), 129.87 (d, CH<sub>m-Ph</sub>, <sup>2</sup>J<sub>PC</sub> = 6.1), 137.04 (d, C<sub>m-Ph</sub>, <sup>3</sup>J<sub>PC</sub> = 11.1), 138.81 (C<sub>m-Ph</sub>), 139.13 (NHC<sub>6</sub>H<sub>4</sub>Cl), 139.39 (NHC<sub>6</sub>H<sub>4</sub>Cl), 139.39 [CC(CH<sub>3</sub>)<sub>3</sub>], 152.77 (C=O), 153.16 (C=O), 153.21 (COH). <sup>31</sup>P NMR (DMSO-*d*<sub>6</sub>, 242.94 MHz), δ, ppm: 26.60. Anal. Calcd for C<sub>39</sub>H<sub>47</sub>Cl<sub>2</sub>N<sub>4</sub>O<sub>6</sub>P (%): C, 60.86; H, 6.15; Cl, 9.21; N, 7.28; P, 4.02. Found (%): C, 60.88; H, 6.17; Cl, 9.24; N, 7.30; P, 4.05. HRMS (MALDI-TOF) m/z for C<sub>39</sub>H<sub>47</sub>Cl<sub>2</sub>N<sub>4</sub>O<sub>6</sub>P: calc. 768.3 [M]<sup>+</sup>, found: 769.4 [M+H]<sup>+</sup>, 791.2 [M+Na]<sup>+</sup>.

**Diphenyl((2,4-bis-(3-(*p*-chlorophenyl)ureido)phenyl)(3,5-di-*tert*-butyl-4-hydroxyphenyl)methyl)phosphonate 16d.** White solid, yield 83%, M.p.: 220-221°C. IR (KBr), ν, cm<sup>-1</sup>: 826; 1011; 1026; 1207; 1547; 1696, 1641; 2959; 3310; 3629. <sup>1</sup>H NMR (DMSO-*d*<sub>6</sub>, 400.13 MHz), δ, ppm: 1.28 [s, 18H, C(CH<sub>3</sub>)<sub>3</sub>], 5.20 (d, 1H, CHP, <sup>2</sup>J<sub>PH</sub> = 27.4), 6.63 (d, 2H, OC<sub>6</sub>H<sub>5</sub>, <sup>3</sup>J<sub>HH</sub> = 8.0), 6.94 (s, 1H, OH), 6.95 (d, 1H, CH<sub>m-Ph</sub>, <sup>3</sup>J<sub>HH</sub> = 8.4), 7.09 (t, 1H, OC<sub>6</sub>H<sub>5</sub>, <sup>3</sup>J<sub>HH</sub> = 7.6), 7.18 (m, 3H, OC<sub>6</sub>H<sub>5</sub>), 7.31 (m, 9H, OC<sub>6</sub>H<sub>5</sub>, CHCC(CH<sub>3</sub>)<sub>3</sub>, NHC<sub>6</sub>H<sub>4</sub>Cl, CH<sub>m-Ph</sub>), 7.48 (m, 4H, NHC<sub>6</sub>H<sub>4</sub>Cl), 7.81 (s, 1H, CH<sub>m-Ph</sub>), 7.82 (d, 1H, CH<sub>m-Ph</sub>, <sup>3</sup>J<sub>HH</sub> = 9.4), 8.34 (s, 1H, NH), 8.77 (s, 1H, NH), 8.81 (s, 1H, NH), 9.00 (s, 1H, NH). <sup>13</sup>C{<sup>1</sup>H} NMR (DMSO-*d*<sub>6</sub>, 100.57 MHz), δ, ppm: 31.19 [C(CH<sub>3</sub>)<sub>3</sub>], 35.52 [C(CH<sub>3</sub>)<sub>3</sub>], 44.33 (d, CHP, <sup>1</sup>J<sub>PC</sub> = 142.4), 115.53 (CH<sub>m-Ph</sub>), 116.08 (CH<sub>m-Ph</sub>), 120.58 (NHC<sub>6</sub>H<sub>4</sub>Cl), 120.75 (NHC<sub>6</sub>H<sub>4</sub>Cl), 120.05 (NHC<sub>6</sub>H<sub>4</sub>Cl), 121.12 (d, OC<sub>6</sub>H<sub>5</sub>, <sup>3</sup>J<sub>PC</sub> = 4.0), 121.43 (d, OC<sub>6</sub>H<sub>5</sub>, <sup>3</sup>J<sub>PC</sub> = 3.0), 123.86 (C<sub>m-Ph</sub>), 125.91 (OC<sub>6</sub>H<sub>5</sub>), 126.18 (OC<sub>6</sub>H<sub>5</sub>), 126.30 (NHC<sub>6</sub>H<sub>4</sub>Cl), 126.42 (NHC<sub>6</sub>H<sub>4</sub>Cl), 126.69 (d, CCHP, <sup>3</sup>J<sub>PC</sub> = 4.0), 127.00 [CHCC(CH<sub>3</sub>)<sub>2</sub>], 127.08 [CHCC(CH<sub>3</sub>)<sub>2</sub>], 130.23 (d, CH<sub>m-Ph</sub>, <sup>3</sup>J<sub>PC</sub> = 4.0), 129.59 (NHC<sub>6</sub>H<sub>4</sub>Cl), 130.45 (OC<sub>6</sub>H<sub>5</sub>), 130.75 (OC<sub>6</sub>H<sub>5</sub>), 137.75 (d, C<sub>m-Ph</sub>, <sup>3</sup>J<sub>PC</sub> = 12.1), 139.61 (NHC<sub>6</sub>H<sub>4</sub>Cl), 139.83 (NHC<sub>6</sub>H<sub>4</sub>Cl), 139.89 (C<sub>m-Ph</sub>), 140.24 [CC(CH<sub>3</sub>)<sub>3</sub>], 150.94 (d, OC<sub>6</sub>H<sub>5</sub>, <sup>3</sup>J<sub>PC</sub> = 11.1), 150.27 (d, OC<sub>6</sub>H<sub>5</sub>, <sup>3</sup>J<sub>PC</sub> = 9.1), 153.29 (C=O), 153.87 (C=O), 154.24 (COH). <sup>31</sup>P NMR (DMSO-*d*<sub>6</sub>, 161.90 MHz), δ, ppm: 20.17. Anal. Calcd for C<sub>47</sub>H<sub>47</sub>Cl<sub>2</sub>N<sub>4</sub>O<sub>6</sub>P (%): C, 65.20; H, 5.47; Cl, 8.19; N, 6.47; P, 3.58. Found (%): C, 65.23; H, 5.49; Cl, 8.23; N, 6.50; P, 3.60. HRMS (MALDI-TOF) m/z for C<sub>47</sub>H<sub>47</sub>Cl<sub>2</sub>N<sub>4</sub>O<sub>6</sub>P: calc. 864.3 [M]<sup>+</sup>, found: 865.6 [M+H]<sup>+</sup>; 903.6 [M+K]<sup>+</sup>.

**Dimethyl((2,6-bis-(3-(*p*-nitrophenyl)ureido)pyridin-3-yl)(3,5-di-*tert*-butyl-4-hydroxyphenyl)methyl)phosphonate 17a.** Yellow solid, yield 83%, M.p.: 266-267°C. IR (KBr), ν, cm<sup>-1</sup>: 848; 1037; 1213; 1541; 1594, 1718; 2958; 3335; 3601. <sup>1</sup>H NMR (DMSO-*d*<sub>6</sub>, 400.13 MHz), δ, ppm: 1.31 [s, 18H, C(CH<sub>3</sub>)<sub>3</sub>], 3.52 (t, 6H, OCH<sub>3</sub>, <sup>3</sup>J<sub>PH</sub> = 10.2), 4.77 (d, 1H, CHP, <sup>2</sup>J<sub>PH</sub> = 26.3), 6.88 (s, 1H, OH), 7.29 (s, 2H, CHCC(CH<sub>3</sub>)<sub>3</sub>), 7.31 (d, 1H, CH<sub>m-Ph</sub>, <sup>4</sup>J<sub>HH</sub> = 2.2), 7.31 (d, 2H, NHC<sub>6</sub>H<sub>4</sub>NO<sub>2</sub>, <sup>3</sup>J<sub>HH</sub> = 3.5), 7.70 (m, 5H, NHC<sub>6</sub>H<sub>4</sub>NO<sub>2</sub>, CH<sub>m-Ph</sub>), 7.80 (s, 1H, CH<sub>m-Ph</sub>), 8.19 (d, 2H, NHC<sub>6</sub>H<sub>4</sub>NO<sub>2</sub>, <sup>3</sup>J<sub>HH</sub> = 5.2), 8.21 (d, 2H, NHC<sub>6</sub>H<sub>4</sub>NO<sub>2</sub>, <sup>3</sup>J<sub>HH</sub> = 5.2), 8.49 (s, 1H, NH), 9.00 (s, 1H, NH), 9.37 (s, 1H, NH), 9.61 (s, 1H, NH). <sup>13</sup>C{<sup>1</sup>H} NMR (DMSO-*d*<sub>6</sub>, 100.57 MHz), δ, ppm: 31.29 [C(CH<sub>3</sub>)<sub>3</sub>], 35.52 [C(CH<sub>3</sub>)<sub>3</sub>], 43.39 (d, CHP, <sup>1</sup>J<sub>PC</sub> = 139.4), 53.91 (d, POCH<sub>3</sub>, <sup>2</sup>J<sub>PC</sub> = 7.1), 54.06 (d, POCH<sub>3</sub>, <sup>2</sup>J<sub>PC</sub> = 7.1), 116.15 (CH<sub>m-Ph</sub>); 116.60 (CH<sub>m-Ph</sub>), 118.41 (NHC<sub>6</sub>H<sub>4</sub>NO<sub>2</sub>), 118.51 (NHC<sub>6</sub>H<sub>4</sub>NO<sub>2</sub>), 125.64 (d, C<sub>m-Ph</sub>, <sup>2</sup>J<sub>PC</sub> = 4.0), 126.11 (NHC<sub>6</sub>H<sub>4</sub>NO<sub>2</sub>), 126.47 [CHCC(CH<sub>3</sub>)<sub>2</sub>], 126.55 [CHCC(CH<sub>3</sub>)<sub>2</sub>], 128.10 (d, CCHP, <sup>2</sup>J<sub>PC</sub> = 4.0), 130.58 (d, CH<sub>m-Ph</sub>, <sup>3</sup>J<sub>PC</sub> = 4.0), 137.03 (d, C<sub>m-Ph</sub>, <sup>3</sup>J<sub>PC</sub> = 10.1), 139.03 (C<sub>m-Ph</sub>), 140.04 [CC(CH<sub>3</sub>)<sub>3</sub>], 142.00 (NHC<sub>6</sub>H<sub>4</sub>NO<sub>2</sub>), 142.07 (NHC<sub>6</sub>H<sub>4</sub>NO<sub>2</sub>), 147.27 (NHC<sub>6</sub>H<sub>4</sub>NO<sub>2</sub>), 147.52 (NHC<sub>6</sub>H<sub>4</sub>NO<sub>2</sub>), 152.84 (C=O), 153.45 (C=O), 153.80 (COH). <sup>31</sup>P NMR (DMSO-*d*<sub>6</sub>, 161.90 MHz), δ, ppm: 26.83. Anal. Calcd for C<sub>37</sub>H<sub>43</sub>N<sub>6</sub>O<sub>10</sub>P (%): C, 58.26; H, 5.68; N, 11.02; P, 4.06. Found (%): C, 58.30; H, 5.70; N, 11.04; P, 4.10. HRMS (MALDI-TOF) m/z for C<sub>37</sub>H<sub>43</sub>N<sub>6</sub>O<sub>10</sub>P: calc. 762.3 [M]<sup>+</sup>, found: 785.5 [M+Na]<sup>+</sup>.

**Diethyl((2,4-bis-(3-(*p*-nitrophenyl)ureido)phenyl)(3,5-di-*tert*-butyl-4-hydroxyphenyl)methyl)phosphonate 17b.** Yellow solid, yield 91%, M.p.: 264-265°C. IR (KBr), ν,

cm<sup>-1</sup>: 849; 1025; 1052; 1208; 1541; 1594, 1723; 2958; 3327; 3630. <sup>1</sup>H NMR (DMSO-*d*<sub>6</sub>, 400.13 MHz),  $\delta$ , ppm: 1.01 (t, 3H, OCH<sub>2</sub>CH<sub>3</sub>, <sup>3</sup>J<sub>HH</sub> = 7.0), 1.07 (t, 3H, OCH<sub>2</sub>CH<sub>3</sub>, <sup>3</sup>J<sub>HH</sub> = 7.0), 1.31 [s, 18H, CH(CH<sub>3</sub>)<sub>2</sub>], 3.77 (m, 1H, OCH<sub>2</sub>CH<sub>3</sub>), 3.83 (m, 1H, OCH<sub>2</sub>CH<sub>3</sub>), 3.90 (m, 2H, OCH<sub>2</sub>CH<sub>3</sub>), 4.70 (d, 1H, CHP, <sup>2</sup>J<sub>PH</sub> = 26.5), 6.85 (s, 1H, OH), 7.27 (d, 1H, CH<sub>m-Ph</sub>, <sup>3</sup>J<sub>HH</sub> = 8.6, 2.1), 7.29 (s, 2H, CHCC(CH<sub>3</sub>)<sub>3</sub>), 7.70 (m, 5H, NHC<sub>6</sub>H<sub>4</sub>NO<sub>2</sub>, CH<sub>m-Ph</sub>), 7.82 (s, 1H, CH<sub>m-Ph</sub>), 8.19 (dd, 4H, NHC<sub>6</sub>H<sub>4</sub>NO<sub>2</sub>, <sup>3</sup>J<sub>HH</sub> = 9.0, 5.2), 8.49 (s, 1H, NH), 8.99 (s, 1H, NH), 9.35 (s, 1H, NH), 9.62 (s, 1H, NH). <sup>13</sup>C{<sup>1</sup>H} NMR (DMSO-*d*<sub>6</sub>, 100.57 MHz),  $\delta$ , ppm: 16.30 (d, OCH<sub>2</sub>CH<sub>3</sub>, <sup>3</sup>J<sub>PC</sub> = 6.1), 16.50 (d, OCH<sub>2</sub>CH<sub>3</sub>, <sup>3</sup>J<sub>PC</sub> = 6.1), 31.17 [C(CH<sub>3</sub>)<sub>3</sub>], 35.40 [C(CH<sub>3</sub>)<sub>3</sub>], 43.27 (d, CHP, <sup>1</sup>J<sub>PC</sub> = 139.4), 62.39 (d, OCH<sub>2</sub>CH<sub>3</sub>, <sup>2</sup>J<sub>PC</sub> = 7.1), 62.72 (d, OCH<sub>2</sub>CH<sub>3</sub>, <sup>2</sup>J<sub>PC</sub> = 7.1), 116.03 (CH<sub>m-Ph</sub>); 116.47 (CH<sub>m-Ph</sub>), 118.28 (NHC<sub>6</sub>H<sub>4</sub>NO<sub>2</sub>), 118.38 (NHC<sub>6</sub>H<sub>4</sub>NO<sub>2</sub>), 125.49 (d, C<sub>m-Ph</sub>, <sup>2</sup>J<sub>PC</sub> = 4.0), 125.98 (NHC<sub>6</sub>H<sub>4</sub>NO<sub>2</sub>), 126.34 [CHCC(CH<sub>3</sub>)<sub>2</sub>], 126.42 [CHCC(CH<sub>3</sub>)<sub>2</sub>], 127.99 (d, CCHP, <sup>2</sup>J<sub>PC</sub> = 4.0), 130.47 (d, CH<sub>m-Ph</sub>, <sup>3</sup>J<sub>PC</sub> = 4.0), 136.90 (d, C<sub>m-Ph</sub>, <sup>3</sup>J<sub>PC</sub> = 10.1), 138.90 (C<sub>m-Ph</sub>), 139.91 [CC(CH<sub>3</sub>)<sub>3</sub>], 141.87 (NHC<sub>6</sub>H<sub>4</sub>NO<sub>2</sub>), 141.97 (NHC<sub>6</sub>H<sub>4</sub>NO<sub>2</sub>), 147.14 (NHC<sub>6</sub>H<sub>4</sub>NO<sub>2</sub>), 147.39 (NHC<sub>6</sub>H<sub>4</sub>NO<sub>2</sub>), 152.71 (C=O), 153.32 (C=O), 153.67 (COH). <sup>31</sup>P NMR (DMSO-*d*<sub>6</sub>, 161.90 MHz),  $\delta$ , ppm: 26.50. Anal. Calcd for C<sub>39</sub>H<sub>47</sub>N<sub>6</sub>O<sub>10</sub>P (%): C, 59.23; H, 5.99; N, 10.63; P, 3.92. Found (%): C, 59.26; H, 6.00; N, 10.67; P, 3.95. HRMS (MALDI-TOF) *m/z* for C<sub>39</sub>H<sub>47</sub>N<sub>6</sub>O<sub>10</sub>P: calc. 790.3 [M]<sup>+</sup>, found: 813.5 [M+Na]<sup>+</sup>.

**Diphenyl((2,4-bis-(3-(*p*-nitrophenyl)ureido)phenyl)(3,5-di-*tert*-butyl-4-hydroxyphenyl)methyl)phosphonate 17d.** Yellow solid, yield 80%, M.p.: 221–222°C. IR (KBr),  $\nu$ , cm<sup>-1</sup>: 851; 1025; 1210; 1543; 1679, 1719; 2962; 3317; 3631. <sup>1</sup>H NMR (DMSO-*d*<sub>6</sub>, 400.13 MHz),  $\delta$ , ppm: 1.28 [s, 18H, C(CH<sub>3</sub>)<sub>3</sub>], 5.22 (d, 1H, CHP, <sup>2</sup>J<sub>PH</sub> = 27.2), 6.64 (d, 2H, OC<sub>6</sub>H<sub>5</sub>, <sup>3</sup>J<sub>HH</sub> = 8.0), 6.95 (s, 1H, OH), 6.96 (d, 1H, CH<sub>m-Ph</sub>, <sup>3</sup>J<sub>HH</sub> = 8.4), 7.10 (t, 1H, OC<sub>6</sub>H<sub>5</sub>, <sup>3</sup>J<sub>HH</sub> = 7.2), 7.19 (m, 3H, OC<sub>6</sub>H<sub>5</sub>), 7.32 (m, 3H, OC<sub>6</sub>H<sub>5</sub>, CH<sub>m-Ph</sub>), 7.38 (s, 2H, CHCC(CH<sub>3</sub>)<sub>3</sub>), 7.71 (dd, 4H, NHC<sub>6</sub>H<sub>4</sub>NO<sub>2</sub>, <sup>3</sup>J<sub>HH</sub> = 9.4, 2.2), 7.86 (s, 1H, CH<sub>m-Ph</sub>), 8.20 (dd, 4H, NHC<sub>6</sub>H<sub>4</sub>NO<sub>2</sub>, <sup>3</sup>J<sub>HH</sub> = 9.1, 5.8), 8.57 (s, 1H, NH), 9.06 (s, 1H, NH), 9.40 (s, 1H, NH), 9.59 (s, 1H, NH). <sup>13</sup>C{<sup>1</sup>H} NMR (DMSO-*d*<sub>6</sub>, 100.57 MHz),  $\delta$ , ppm: 31.16 [C(CH<sub>3</sub>)<sub>3</sub>], 35.51 [C(CH<sub>3</sub>)<sub>3</sub>], 44.44 (d, CHP, <sup>1</sup>J<sub>PC</sub> = 140.4), 53.91 (d, POCH<sub>3</sub>, <sup>2</sup>J<sub>PC</sub> = 7.1), 54.06 (d, POCH<sub>3</sub>, <sup>2</sup>J<sub>PC</sub> = 7.1), 116.36 (CH<sub>m-Ph</sub>); 116.84 (CH<sub>m-Ph</sub>), 118.42 (NHC<sub>6</sub>H<sub>4</sub>NO<sub>2</sub>), 118.53 (NHC<sub>6</sub>H<sub>4</sub>NO<sub>2</sub>), 121.10 (d, OC<sub>6</sub>H<sub>5</sub>, <sup>3</sup>J<sub>PC</sub> = 4.0), 121.41 (d, OC<sub>6</sub>H<sub>5</sub>, <sup>3</sup>J<sub>PC</sub> = 4.0), 124.91 (d, C<sub>m-Ph</sub>, <sup>2</sup>J<sub>PC</sub> = 4.0), 125.94 (OC<sub>6</sub>H<sub>5</sub>), 126.11 (NHC<sub>6</sub>H<sub>4</sub>NO<sub>2</sub>), 126.21 (OC<sub>6</sub>H<sub>5</sub>), 126.56 (d, CCHP, <sup>2</sup>J<sub>PC</sub> = 5.1), 126.99 [CHCC(CH<sub>3</sub>)<sub>2</sub>], 126.07 [CHCC(CH<sub>3</sub>)<sub>2</sub>], 130.37 (CH<sub>m-Ph</sub>), 130.46 (OC<sub>6</sub>H<sub>5</sub>), 130.77 (OC<sub>6</sub>H<sub>5</sub>), 137.30 (d, C<sub>m-Ph</sub>, <sup>3</sup>J<sub>PC</sub> = 10.1), 139.45 (C<sub>m-Ph</sub>), 140.27 [CC(CH<sub>3</sub>)<sub>3</sub>], 142.04 (NHC<sub>6</sub>H<sub>4</sub>NO<sub>2</sub>), 142.09 (NHC<sub>6</sub>H<sub>4</sub>NO<sub>2</sub>), 147.23 (NHC<sub>6</sub>H<sub>4</sub>NO<sub>2</sub>), 147.44 (NHC<sub>6</sub>H<sub>4</sub>NO<sub>2</sub>), 151.00 (d, OC<sub>6</sub>H<sub>5</sub>, <sup>3</sup>J<sub>PC</sub> = 10.1), 151.24 (d, OC<sub>6</sub>H<sub>5</sub>, <sup>3</sup>J<sub>PC</sub> = 10.1), 152.83 (C=O), 153.50 (C=O), 154.27 (COH). <sup>31</sup>P NMR (DMSO-*d*<sub>6</sub>, 161.90 MHz),  $\delta$ , ppm: 19.99. Anal. Calcd for C<sub>47</sub>H<sub>47</sub>N<sub>6</sub>O<sub>10</sub>P (%): C, 63.65; H, 5.34; N, 9.48; P, 3.49. Found (%): C, 63.67; H, 5.37; N, 9.51; P, 3.51. HRMS (MALDI-TOF) *m/z* for C<sub>47</sub>H<sub>47</sub>N<sub>6</sub>O<sub>10</sub>P: calc. 886.3 [M]<sup>+</sup>, found: 909.4 [M+K]<sup>+</sup>.

**Dimethyl[(2-amino-6-(3-phenylthioureido)pyridin-3-yl)(3,5-di-*tert*-butyl-4-hydroxyphenyl)methyl]phosphonate 18a.** White-gray solid, yield 0.45 g (80%), M.p.: 108–109°C. IR (KBr),  $\nu$ , cm<sup>-1</sup>: 768, 1032, 1058, 1235, 1357 (C=S), 1599, 3326 (NH), 3433 (NH<sub>2</sub>), 3628 (OH). <sup>1</sup>H NMR (500.13 MHz, DMSO-*d*<sub>6</sub>),  $\delta$ , ppm: 1.37, 1.38, 1.39 [all s, 18H, C(CH<sub>3</sub>)<sub>3</sub>], 3.50, 3.56, 3.57, 3.62 [all d, 6H, <sup>3</sup>J<sub>HH</sub> = 10.6 Hz, OCH<sub>3</sub>], 4.67, 4.92, 4.98 [all d, 1H, <sup>2</sup>J<sub>PH</sub> = 26.7 Hz, CHP], 6.24, 6.44 [all d, 1H, <sup>3</sup>J<sub>HH</sub> = 8.5 Hz, CH<sub>py</sub>], 6.50 (br.s, 2H, NH<sub>2</sub>), 6.88, 6.91, 6.93 [all s, 1H, OH], 7.06–7.22 (m, 1H, NHC<sub>6</sub>H<sub>5</sub>), 7.30, 7.31, 7.32 [all s, 2H, CHCC(CH<sub>3</sub>)<sub>3</sub>], 7.34–7.38 (m, 2H, NHC<sub>6</sub>H<sub>5</sub>), 7.50, 7.68 [all d, 2H, <sup>3</sup>J<sub>HH</sub> = 9.3 Hz, NHC<sub>6</sub>H<sub>5</sub>], 7.87, 8.05 (dd, 1H, <sup>3</sup>J<sub>HH</sub> = 8.2 Hz, <sup>4</sup>J<sub>PH</sub> = 1.4 Hz, CH<sub>py</sub>), 9.43, 9.77, 9.88, 10.32 [all s, 1H, NH], 10.45, 10.83 [all s, 1H, NH]. <sup>13</sup>C{<sup>1</sup>H} NMR (125.76 MHz, DMSO-*d*<sub>6</sub>),  $\delta$ , ppm: 30.80, 30.87 [C(CH<sub>3</sub>)<sub>3</sub>], 35.05, 35.07, 35.12 [C(CH<sub>3</sub>)<sub>3</sub>], 42.02, 43.33, 43.46 [all d, <sup>1</sup>J<sub>PC</sub> = 134.6 Hz, CHP], 53.20, 53.45, 53.67, 53.82 [all d, <sup>2</sup>J<sub>PC</sub> = 7.0 Hz, OCH<sub>3</sub>], 100.05, 103.14 (CH<sub>py</sub>), 110.64 (C<sub>py</sub>), 124.10 (NHC<sub>6</sub>H<sub>5</sub>), 124.40 (NHC<sub>6</sub>H<sub>5</sub>), 124.75 (NHC<sub>6</sub>H<sub>5</sub>), 124.87 (NHC<sub>6</sub>H<sub>5</sub>), 126.38 (NHC<sub>6</sub>H<sub>5</sub>), 126.16, 126.41 [all d, <sup>3</sup>J<sub>PC</sub>

= 7.4 Hz,  $\underline{\text{CHCC}}(\text{CH}_3)_3$ , 127.26, 128.60 (all d,  $^2J_{\text{PC}} = 4.6$  Hz,  $\underline{\text{CCHP}}$ ), 128.58, 128.63, 128.77, 128.88 ( $\text{NHC}_6\text{H}_5$ ), 139.37, 139.46 [ $\underline{\text{CC}}(\text{CH}_3)_3$ ], 139.59 ( $\text{NHC}_6\text{H}_5$ ), 139.93 ( $\text{NHC}_6\text{H}_5$ ), 140.27, 140.75 (all d,  $^3J_{\text{PC}} = 4.8$  Hz,  $\text{CH}_{\text{py}}$ ), 146.75, 155.15 (all d,  $^3J_{\text{PC}} = 11.4$  Hz,  $\text{C}_{\text{py}}$ ), 151.02, 151.39 ( $\text{C}_{\text{py}}$ ), 153.23 ( $\text{NHC}_6\text{H}_5$ ), 153.39 (OH), 151.33, 155.20 ( $\text{C}_{\text{py}}$ ), 180.12, 180.30 ( $\text{C}=\text{S}$ ).  $^{31}\text{P}$  NMR (202.46 MHz,  $\text{DMCO-}d_6$ ),  $\delta$ , ppm: 27.92, 28.47, 28.50. Anal. Calcd for  $\text{C}_{29}\text{H}_{39}\text{N}_4\text{O}_4\text{PS}$  (%): C, 61.03; H, 6.89; N, 9.82; P, 5.43; S, 5.62. Found (%): C, 61.05; H, 6.90; N, 9.84; P, 5.46; S, 5.64. HRMS (MALDI-TOF)  $m/z$  for  $\text{C}_{29}\text{H}_{39}\text{N}_4\text{O}_4\text{PS}$ : calc. 570.24  $[\text{M}]^+$ , found 571.46  $[\text{M}+\text{H}]^+$ , 593.44  $[\text{M}+\text{Na}]^+$ .

**Diethyl[(2-amino-6-(3-phenylthioureido)pyridin-3-yl)(3,5-di-*tert*-butyl-4-hydroxyphenyl)methyl]phosphonate 18b.** White-gray solid, yield 0.45 g (75%), M.p.: 111–112°C. IR (KBr),  $\nu$ ,  $\text{cm}^{-1}$ : 772, 1034, 1059, 1237, 1345, 1597, 3322, 3436, 3630.  $^1\text{H}$  NMR (500.13 MHz,  $\text{DMCO-}d_6$ ),  $\delta$ , ppm: 1.54, 1.57 (all t, 3H,  $^3J_{\text{HH}} = 7.1$  Hz,  $\text{OCH}_2\text{CH}_3$ ), 1.62, 1.68 (all t, 3H,  $^3J_{\text{HH}} = 7.1$  Hz,  $\text{OCH}_2\text{CH}_3$ ), 1.89, 1.91 [all s, 18H,  $\text{C}(\text{CH}_3)_3$ ], 4.31 (m, 1H,  $\text{OCH}_2\text{CH}_3$ ), 4.47 (m, 1H,  $\text{OCH}_2\text{CH}_3$ ), 4.54 (m, 2H,  $\text{OCH}_2\text{CH}_3$ ), 4.98, 5.00, 5.34 (all d, 1H,  $^2J_{\text{PH}} = 27.0$  Hz,  $\text{CHP}$ ), 6.42 (br.s, 2H,  $\text{NH}_2$ ), 6.51, 6.55 (all s, 1H, OH), 6.81, 7.01 (all d, 1H,  $^3J_{\text{HH}} = 8.5$  Hz,  $\text{CH}_{\text{py}}$ ), 7.63 (m, 1H,  $\text{NHC}_6\text{H}_5$ ), 7.80 (m, 2H,  $\text{NHC}_6\text{H}_5$ ), 7.89, 7.90 [all d, 2H,  $^4J_{\text{PH}} = 1.5$  Hz,  $\text{CHCC}(\text{CH}_3)_3$ ], 8.23 (m, 2H,  $\text{NHC}_6\text{H}_5$ ), 8.43, 8.47 (all d, 1H,  $^3J_{\text{HH}} = 8.1$  Hz,  $\text{CH}_{\text{py}}$ ), 9.43 (s, 1H, NH), 9.92 (s, 1H, NH).  $^{13}\text{C}\{^1\text{H}\}$  NMR (125.76 MHz,  $\text{DMCO-}d_6$ ),  $\delta$ , ppm: 16.19, 16.24 ( $\text{OCH}_2\text{CH}_3$ ), 30.26, 30.30 [ $\text{C}(\text{CH}_3)_3$ ], 34.84, 34.93 [ $\underline{\text{C}}(\text{CH}_3)_3$ ], 44.20, 45.32 (all d,  $^1J_{\text{PC}} = 138.6$  Hz,  $\text{CHP}$ ), 62.39, 62.42 (all d,  $^2J_{\text{PC}} = 6.9$  Hz,  $\text{OCH}_2\text{CH}_3$ ), 62.87, 63.11 (all d,  $^2J_{\text{PC}} = 6.9$  Hz,  $\text{OCH}_2\text{CH}_3$ ), 100.90, 102.67 ( $\text{CH}_{\text{py}}$ ), 107.85, 110.79 ( $\text{C}_{\text{py}}$ ), 124.62 ( $\text{NHC}_6\text{H}_5$ ), 124.79 ( $\text{NHC}_6\text{H}_5$ ), 1245.01 ( $\text{NHC}_6\text{H}_5$ ), 125.14 ( $\text{NHC}_6\text{H}_5$ ), 125.51 ( $\text{NHC}_6\text{H}_5$ ), 126.91, 126.94 (all d,  $^3J_{\text{PC}} = 7.6$  Hz,  $\text{CHCC}(\text{CH}_3)_3$ ), 126.57, 127.06 (all d,  $^2J_{\text{PC}} = 4.8$  Hz,  $\underline{\text{CCHP}}$ ), 128.54 ( $\text{NHC}_6\text{H}_5$ ), 128.58 ( $\text{NHC}_6\text{H}_5$ ), 137.75, 137.87, 138.09, 138.21 [ $\underline{\text{CC}}(\text{CH}_3)_3$ ], 139.91, 140.06, 140.15 ( $\text{NHC}_6\text{H}_5$ ), 141.30, 141.98 (all d,  $^3J_{\text{PC}} = 6.0$  Hz,  $\text{CH}_{\text{py}}$ ), 149.81, 151.58, 151.66 ( $\text{C}_{\text{py}}$ ), 153.70, 153.80 (COH), 155.60, 156.78 ( $\text{C}_{\text{py}}$ ), 178.92, 179.12, 179.25, 179.35 ( $\text{C}=\text{S}$ ).  $^{31}\text{P}$  NMR (202.46 MHz,  $\text{DMCO-}d_6$ ),  $\delta$ , ppm: 25.65, 26.07, 26.24. Anal. Calcd for  $\text{C}_{31}\text{H}_{43}\text{N}_4\text{O}_4\text{PS}$  (%): C, 62.19; H, 7.24; N, 9.36; P, 5.17; S, 5.35. Found (%): C, 62.20; H, 7.26; N, 9.38; P, 5.20; S, 5.39. HRMS (MALDI-TOF)  $m/z$  for  $\text{C}_{31}\text{H}_{43}\text{N}_4\text{O}_4\text{PS}$ : calc. 598.27  $[\text{M}]^+$ , found 599.32  $[\text{M}+\text{H}]^+$ , 621.33  $[\text{M}+\text{Na}]^+$ .

**Diisopropyl[(2-amino-6-(3-phenylthioureido)pyridin-3-yl)(3,5-di-*tert*-butyl-4-hydroxyphenyl)methyl]phosphonate 18c.** White-gray solid, yield 0.49 g (78%), M.p.: 125–126°C. IR (KBr),  $\nu$ ,  $\text{cm}^{-1}$ : 748, 992, 1236, 1357, 1599, 3302, 3433, 3629.  $^1\text{H}$  NMR (500.13 MHz,  $\text{DMCO-}d_6$ ),  $\delta$ , ppm: 0.83, 0.87 [all d, 3H,  $^3J_{\text{HH}} = 6.2$  Hz,  $\text{OCH}(\text{CH}_3)_2$ ], 1.04, 1.06 [all d, 3H,  $^3J_{\text{HH}} = 6.2$  Hz,  $\text{OCH}(\text{CH}_3)_2$ ], 1.16, 1.18 [all d, 6H,  $^3J_{\text{HH}} = 6.1$  Hz,  $\text{OCH}(\text{CH}_3)_2$ ], 1.36, 1.37, 1.38 [all s, 18H,  $\text{C}(\text{CH}_3)_3$ ], 4.42 [all m, 1H,  $\text{OCH}(\text{CH}_3)_2$ ], 4.47 [all m, 1H,  $\text{OCH}(\text{CH}_3)_2$ ], 4.49, 4.67 (all d, 1H,  $^2J_{\text{PH}} = 27.0$  Hz,  $\text{CHP}$ ), 6.12, 6.22, 6.33 (all d, 1H,  $^3J_{\text{PH}} = 7.6$  Hz,  $\text{CH}_{\text{py}}$ ), 6.46 (br.s, 2H,  $\text{NH}_2$ ), 6.82, 6.87, 6.90 (all s, 1H, OH), 7.06–7.19 (m, 1H,  $\text{NHC}_6\text{H}_5$ ), 7.32–7.37 [m, 4H,  $\text{CHCC}(\text{CH}_3)_3$  and  $\text{NHC}_6\text{H}_5$ ], 7.50, 7.65 (all d, 2H,  $^3J_{\text{HH}} = 8.4$  Hz,  $\text{NHC}_6\text{H}_5$ ), 7.93, 8.04 (all d, 1H,  $^3J_{\text{HH}} = 8.3$  Hz,  $\text{CH}_{\text{py}}$ ), 9.47, 9.76, 10.00 (all s, 1H, NH), 10.42, 10.78, 12.88 (all s, 1H, NH).  $^{13}\text{C}\{^1\text{H}\}$  NMR (125.76 MHz,  $\text{DMCO-}d_6$ ),  $\delta$ , ppm: 23.38, 23.80, 24.34, 24.45 [ $\text{OCH}(\text{CH}_3)_2$ ], 30.72, 30.83, 30.85 [ $\text{C}(\text{CH}_3)_3$ ], 35.04, 35.09, 35.13 [ $\underline{\text{C}}(\text{CH}_3)_3$ ], 42.61, 45.52, 45.62 (all d,  $^1J_{\text{PC}} = 140.2$  Hz,  $\text{CHP}$ ), 70.45, 70.71, 70.82, 71.23 [all d,  $^2J_{\text{PC}} = 7.3$  Hz,  $\text{OCH}(\text{CH}_3)_2$ ], 99.87, 103.02, 103.44 ( $\text{CH}_{\text{py}}$ ), 107.14, 110.53, 110.62 ( $\text{C}_{\text{py}}$ ), 124.12, 124.52, 124.88, 124.49 ( $\text{NHC}_6\text{H}_5$ ), 126.33, 126.62 [all d,  $^3J_{\text{PC}} = 7.6$  Hz,  $\text{CHCC}(\text{CH}_3)_3$ ], 126.62, 127.02 ( $\underline{\text{CCHP}}$ ), 128.65, 128.90 ( $\text{NHC}_6\text{H}_5$ ), 139.17, 139.49, [ $\underline{\text{CC}}(\text{CH}_3)_3$ ], 139.65, 139.98 ( $\text{NHC}_6\text{H}_5$ ), 139.50, 142.02 ( $\text{CH}_{\text{py}}$ ), 153.09 (COH), 155.32, 156.55 ( $\text{C}_{\text{py}}$ ), 178.52, 180.13 ( $\text{C}=\text{S}$ ).  $^{31}\text{P}$  NMR (202.46 MHz,  $\text{DMCO-}d_6$ ),  $\delta$ , ppm: 24.50, 24.88, 24.97. Anal. Calcd for  $\text{C}_{31}\text{H}_{43}\text{N}_4\text{O}_4\text{PS}$  (%): C, 63.24; H, 7.56; N, 8.94; P, 4.94; S, 5.11. Found (%): C, 63.26; H, 7.57; N,



8.98; P, 4.99; S, 5.16. HRMS (MALDI-TOF)  $m/z$  for  $C_{33}H_{47}N_4O_4PS$ : calc. 626.31  $[M]^+$ , found 625.42  $[M-H]^+$ .

**Diphenyl[(2-amino-6-(3-phenylthioureido)pyridin-3-yl)(3,5-di-*tert*-butyl-4-hydroxyphenyl)methyl]phosphonate 18d.** White-gray solid, yield 0.55 g (79%), M.p.: 129–130°C. IR (KBr),  $\nu$ ,  $cm^{-1}$ : 766, 1008, 1239, 1360, 1593, 3321, 3398, 3625.  $^1H$  NMR (400.05 MHz,  $DMCO-d_6$ ),  $\delta$ , ppm: 1.32, 1.33 [all s, 18H,  $C(CH_3)_3$ ], 5.14, 5.53 (all d, 1H,  $^2J_{PH} = 28.2$  Hz, CHP), 6.27, 6.45 (all d, 1H,  $^3J_{HH} = 8.6$  Hz,  $CH_{py}$ ), 6.51 (br.s, 2H,  $NH_2$ ), 6.62 (d, 2H,  $^3J_{HH} = 7.6$  Hz,  $OC_6H_5$ ), 6.96–6.99 (m, 2H,  $NHC_6H_5$ ), 7.06–7.11 (m, 2H,  $OC_6H_5$  and  $NHC_6H_5$ ), 7.16–7.22 [m, 3H,  $CHCC(CH_3)_3$  and  $NHC_6H_5$ ], 7.32–7.41 (m, 6H,  $OC_6H_5$  and  $NHC_6H_5$ ), 7.64 (d, 2H,  $^3J_{HH} = 7.6$  Hz,  $OC_6H_5$ ), 7.67 (d, 2H,  $^3J_{HH} = 7.5$  Hz,  $OC_6H_5$ ), 7.92, 7.98 (all d, 1H,  $^3J_{HH} = 8.3$  Hz,  $CH_{py}$ ), 9.41 (s, 1H, NH), 9.76, 10.48 (all s, 1H, NH).  $^{13}C\{^1H\}$  NMR (100.60 MHz,  $DMCO-d_6$ ),  $\delta$ , ppm: 30.72 [ $C(CH_3)_3$ ], 35.04, 35.10 [ $C(CH_3)_3$ ], 42.02, 43.44 (all d,  $^1J_{PC} = 139.6$  Hz, CHP), 100.14, 103.29 ( $CH_{py}$ ), 106.10, 108.46 ( $C_{py}$ ), 120.56 ( $OC_6H_5$ ), 120.57 ( $NHC_6H_5$ ), 124.10 ( $NHC_6H_5$ ), 125.32, 125.64 ( $OC_6H_5$ ), 125.34 ( $NHC_6H_5$ ), 125.71 ( $NHC_6H_5$ ), 126.55, 126.78 (all d,  $^3J_{PC} = 7.8$  Hz,  $CHCC(CH_3)_3$ ), 128.59 ( $OC_6H_5$ ), 128.63 ( $OC_6H_5$ ), 129.31, 129.90 ( $CCHP$ ), 129.90 ( $NHC_6H_5$ ), 130.24 ( $NHC_6H_5$ ), 139.58, 139.64 [ $C(CH_3)_3$ ], 139.69 ( $NHC_6H_5$ ), 139.84 ( $NHC_6H_5$ ), 140.13, 141.29 ( $CH_{py}$ ), 150.41 (d,  $^2J_{PC} = 6.4$  Hz,  $OC_6H_5$ ), 150.60 (d,  $^2J_{PC} = 6.4$  Hz,  $OC_6H_5$ ), 150.76, 151.58 ( $C_{py}$ ), 153.72, 153.84 (COH), 156.86 ( $C_{py}$ ), 178.66 (all s, C=S).  $^{31}P$  NMR (161.94 MHz,  $DMCO-d_6$ ),  $\delta$ , ppm: 19.99, 20.15. Anal. Calcd for  $C_{39}H_{43}N_4O_4PS$  (%): C, 67.42; H, 6.24; N, 8.06; P, 4.46; S, 4.61. Found (%): C, 67.44; H, 6.26; N, 8.09; P, 4.51; S, 4.67. HRMS (MALDI-TOF)  $m/z$  for  $C_{39}H_{43}N_4O_4PS$ : calc. 694.27  $[M]^+$ , found 695.42  $[M+H]^+$ , 711.32  $[M+Na]^+$ , 733.42  $[M+K]^+$ .

**Dimethyl[(2,4-bis(3-phenylthioureido)phenyl)(3,5-di-*tert*-butyl-4-hydroxyphenyl)methyl]phosphonate 19a.** White-gray solid, yield 0.53 g (75%), M.p.: 140–141°C. IR (KBr),  $\nu$ ,  $cm^{-1}$ : 759, 1032, 1054, 1237, 1315, 1596, 3422 (NH), 3624 (OH).  $^1H$  NMR (400.05 MHz,  $DMCO-d_6$ ),  $\delta$ , ppm: 1.32, 1.33, 1.35 [all s, 18H,  $C(CH_3)_3$ ], 3.43, 3.47 (all d, 3H,  $^3J_{PH} = 10.6$  Hz,  $OCH_3$ ), 3.52, 3.57 (all d, 3H,  $^3J_{PH} = 10.7$  Hz,  $OCH_3$ ), 4.62, 4.78 (all d, 1H,  $^2J_{PH} = 24.9$  Hz, CHP), 6.81, 6.85 (all s, 1H, OH), 7.09–7.14 (m, 2H,  $NHC_6H_5$ ), 7.24–7.33 (m, 7H,  $CH_{arom}$ ,  $CHCC(CH_3)_3$  and  $NHC_6H_5$ ), 7.41–7.46 (m, 4H,  $NHC_6H_5$ ), 7.51 (s, 1H,  $CH_{arom}$ ), 7.65 (d, 1H,  $^3J_{HH} = 10.0$  Hz,  $CH_{arom}$ ), 9.38 (s, 2H, NH), 9.76 (s, 1H, NH), 9.86 (s, 1H, NH).  $^{13}C\{^1H\}$  NMR ( $DMCO-d_6$ , 100.60 MHz),  $\delta$ , ppm: 30.80, 30.91 [ $C(CH_3)_3$ ], 35.02 [ $C(CH_3)_3$ ], 43.55 (d,  $^1J_{PC} = 137.7$  Hz, CHP), 53.20 (d,  $^2J_{PC} = 6.8$  Hz,  $OCH_3$ ), 53.68 (d,  $^2J_{PC} = 6.8$  Hz,  $OCH_3$ ), 122.88 (s,  $CH_{arom}$ ), 124.11 ( $NHC_6H_5$ ), 124.30 ( $NHC_6H_5$ ), 124.38 ( $C_{arom}$ ), 124.56 ( $NHC_6H_5$ ), 124.88 ( $NHC_6H_5$ ), 126.54 [d,  $^3J_{PC} = 7.9$  Hz,  $CHCC(CH_3)_3$ ], 127.22 (d,  $^3J_{PC} = 5.0$  Hz,  $C_{arom}$ ), 128.28 ( $NHC_6H_5$ ), 128.89 ( $NHC_6H_5$ ), 129.91 ( $CH_{arom}$ ), 137.21 (d,  $^3J_{PC} = 10.4$  Hz,  $C_{arom}$ ), 138.93 ( $C_{arom}$ ), 139.29 [s,  $C(CH_3)_3$ ], 139.72 ( $NHC_6H_5$ ), 139.93 ( $NHC_6H_5$ ), 153.38 (COH), 179.77 (C=S), 180.98 (C=S).  $^{31}P$  NMR (161.94 MHz,  $DMCO-d_6$ ),  $\delta$ , ppm: 28.36, 29.19. Anal. Calcd for  $C_{37}H_{45}N_4O_4PS_2$  (%): C, 63.05; H, 6.44; N, 7.95; P, 4.39; S, 9.10. Found (%): C, 63.07; H, 6.46; N, 7.99; P, 4.41; S, 9.14. HRMS (MALDI-TOF)  $m/z$  for  $C_{37}H_{45}N_4O_4PS_2$ : calc. 704.26  $[M]^+$ , found 705.42  $[M+H]^+$ , 727.42  $[M+Na]^+$ , 743.02  $[M+K]^+$ .

**Diethyl[(2,4-bis(3-phenylthioureido)phenyl)(3,5-di-*tert*-butyl-4-hydroxyphenyl)methyl]phosphonate 19b.** Drak-gray solid, yield 0.57 g (78%), M.p.: 127–128°C. IR (KBr),  $\nu$ ,  $cm^{-1}$ : 772, 1031, 1056, 1230, 1315, 1597, 3326, 3626.  $^1H$  NMR (400.05 MHz,  $DMCO-d_6$ ),  $\delta$ , ppm: 1.03 (t, 3H,  $^3J_{HH} = 7.0$  Hz,  $OCH_2CH_3$ ), 1.08 (t, 3H,  $^3J_{HH} = 7.0$  Hz,  $OCH_2CH_3$ ), 1.34 [s, 18H,  $C(CH_3)_3$ ], 3.77 (m, 1H,  $OCH_2CH_3$ ), 3.88 (m, 3H,  $OCH_2CH_3$ ), 4.56 (d, 1H,  $^2J_{PH} = 25.3$  Hz, CHP), 6.84 (s, 1H, OH), 7.09–7.15 (m, 2H,  $NHC_6H_5$ ), 7.25–7.34 [m, 7H,  $CHCC(CH_3)_3$ ,  $CH_{arom}$  and  $NHC_6H_5$ ], 7.42–7.51 (m, 4H,  $NHC_6H_5$ ), 7.54 (s, 1H,  $CH_{arom}$ ), 7.68 (d, 1H,  $^3J_{HH} = 8.4$  Hz,  $CH_{arom}$ ), 9.36 (s, 2H, NH), 9.76 (s, 1H, NH), 9.87 (s, 1H, NH).  $^{13}C\{^1H\}$  NMR (100.60 MHz,  $DMCO-d_6$ ),  $\delta$ , ppm: 16.47 (d,  $^3J_{PC} =$

5.3 Hz, OCH<sub>2</sub>CH<sub>3</sub>), 16.61 (d, <sup>3</sup>J<sub>PC</sub> = 4.4 Hz, OCH<sub>2</sub>CH<sub>3</sub>), 30.78 [C(CH<sub>3</sub>)<sub>3</sub>], 35.02 [C(CH<sub>3</sub>)<sub>3</sub>], 44.34 (d, <sup>1</sup>J<sub>PC</sub> = 137.5 Hz, CHP), 62.33 (d, <sup>2</sup>J<sub>PC</sub> = 7.0 Hz, OCH<sub>2</sub>CH<sub>3</sub>), 62.67 (d, <sup>2</sup>J<sub>PC</sub> = 7.0 Hz, OCH<sub>2</sub>CH<sub>3</sub>), 122.18 (CH<sub>m-Ph</sub>), 124.12 (NHC<sub>6</sub>H<sub>5</sub>), 124.29 (NHC<sub>6</sub>H<sub>5</sub>), 122.34 (CH<sub>arom</sub>), 124.59 (NHC<sub>6</sub>H<sub>5</sub>), 124.89 (NHC<sub>6</sub>H<sub>5</sub>), 126.65 [d, <sup>3</sup>J<sub>PC</sub> = 7.3 Hz, CHCC(CH<sub>3</sub>)<sub>3</sub>], 127.36 (CCHP), 128.69 (NHC<sub>6</sub>H<sub>5</sub>), 128.89 (NHC<sub>6</sub>H<sub>5</sub>), 131.18 (CH<sub>arom</sub>), 137.26 (d, <sup>3</sup>J<sub>PC</sub> = 10.1 Hz, C<sub>arom</sub>), 138.86 (C<sub>arom</sub>), 139.10 [C(CH<sub>3</sub>)<sub>3</sub>], 139.70 (NHC<sub>6</sub>H<sub>5</sub>), 139.93 (NHC<sub>6</sub>H<sub>5</sub>), 153.29 (COH), 179.76 (C=S), 180.96 (C=S). <sup>31</sup>P NMR (DMCO-*d*<sub>6</sub>, 161.94 MHz), δ, ppm: 26.36. Anal. Calcd for C<sub>39</sub>H<sub>49</sub>N<sub>4</sub>O<sub>4</sub>PS<sub>2</sub> (%): C, 63.91; H, 6.74; N, 7.64; P, 4.23; S, 8.75. Found (%): C, 63.95; H, 6.76; N, 7.69; P, 4.25; S, 8.77. HRMS (MALDI-TOF) *m/z* for C<sub>39</sub>H<sub>49</sub>N<sub>4</sub>O<sub>4</sub>PS<sub>2</sub>: calc. 732.29 [M]<sup>+</sup>, found 755.34 [M+Na]<sup>+</sup>, 771.28 [M+K]<sup>+</sup>.

**Diphenyl[(2,4-bis(3-phenylthioureido)phenyl)(3,5-di-*tert*-butyl-4-hydroxyphenyl)methyl]phosphonate 19d.** Violet-white solid, yield 0.66 g (80%), M.p.: 129–130°C. IR (KBr), ν, cm<sup>-1</sup>: 761, 939, 1236, 1313, 1593, 3373, 3627. <sup>1</sup>H NMR (600.13 MHz, DMCO-*d*<sub>6</sub>), δ, ppm: 1.31 [s, 18H, C(CH<sub>3</sub>)<sub>3</sub>], 5.25 (d, 1H, <sup>2</sup>J<sub>PH</sub> = 26.1 Hz, CHP), 6.64 (d, 2H, <sup>3</sup>J<sub>HH</sub> = 8.1 Hz, OC<sub>6</sub>H<sub>5</sub>), 6.92 (s, 1H, OH), 6.94 (d, 2H, <sup>3</sup>J<sub>HH</sub> = 8.2 Hz, OC<sub>6</sub>H<sub>5</sub>), 6.92 (s, 1H, OH), 6.94 (d, 2H, <sup>3</sup>J<sub>HH</sub> = 8.2 Hz, OC<sub>6</sub>H<sub>5</sub>), 7.09–7.13 (m, 4H, OC<sub>6</sub>H<sub>5</sub>), 7.17–7.21 (m, 4H, NHC<sub>6</sub>H<sub>5</sub>), 7.25 (t, 2H, <sup>3</sup>J<sub>HH</sub> = 7.7 Hz, OC<sub>6</sub>H<sub>5</sub>), 7.28–7.36 (m, 6H, OC<sub>6</sub>H<sub>5</sub> and NHC<sub>6</sub>H<sub>5</sub>), 7.39 [s, 2H, CHCC(CH<sub>3</sub>)<sub>3</sub>], 7.44–7.52 (m, 4H, NHC<sub>6</sub>H<sub>5</sub>), 7.57 (s, 1H, CH<sub>arom</sub>), 7.87 (d, 1H, <sup>2</sup>J<sub>HH</sub> = 8.5 Hz, CH<sub>arom</sub>), 9.41 (s, 1H, NH), 9.49 (s, 1H, NH), 9.80 (s, 1H, NH), 9.90 (s, 1H, NH). <sup>13</sup>C{<sup>1</sup>H} NMR (150.19 MHz, DMCO-*d*<sub>6</sub>), δ, ppm: 30.70 [C(CH<sub>3</sub>)<sub>3</sub>], 35.03 [C(CH<sub>3</sub>)<sub>3</sub>], 44.77 (d, <sup>1</sup>J<sub>PC</sub> = 139.7 Hz, CHP), 120.61 (OC<sub>6</sub>H<sub>5</sub>), 121.08 (OC<sub>6</sub>H<sub>5</sub>), 122.72 (CH<sub>arom</sub>), 124.13 (C<sub>arom</sub>), 124.31 (NHC<sub>6</sub>H<sub>5</sub>), 124.61 (NHC<sub>6</sub>H<sub>5</sub>), 124.83 (CH<sub>arom</sub>), 125.14 (NHC<sub>6</sub>H<sub>5</sub>), 125.40 (NHC<sub>6</sub>H<sub>5</sub>), 125.73 (C<sub>arom</sub>), 127.08 [d, <sup>3</sup>J<sub>PC</sub> = 7.7 Hz, CHCC(CH<sub>3</sub>)<sub>3</sub>], 128.67 (NHC<sub>6</sub>H<sub>5</sub>), 128.92 (NHC<sub>6</sub>H<sub>5</sub>), 129.77 (CCHP), 129.96 (OC<sub>6</sub>H<sub>5</sub>), 130.21 (OC<sub>6</sub>H<sub>5</sub>), 130.41 (CH<sub>arom</sub>), 137.60 (d, <sup>3</sup>J<sub>PC</sub> = 10.1 Hz, C<sub>arom</sub>), 139.57 (C<sub>arom</sub>), 139.59 [C(CH<sub>3</sub>)<sub>3</sub>], 139.80 (NHC<sub>6</sub>H<sub>5</sub>), 150.49 (d, <sup>2</sup>J<sub>PC</sub> = 9.6 Hz, OC<sub>6</sub>H<sub>5</sub>), 150.80 (d, <sup>2</sup>J<sub>PC</sub> = 9.6 Hz, OC<sub>6</sub>H<sub>5</sub>), 153.86 (COH), 180.07 (C=S), 181.20 (C=S). <sup>31</sup>P NMR (242.94 MHz, DMCO-*d*<sub>6</sub>), δ, ppm: 19.89. Found (%): C, 68.06; H, 5.99; N, 6.78; P, 3.76; S, 7.71. Calc. for C<sub>47</sub>H<sub>49</sub>N<sub>4</sub>O<sub>4</sub>PS<sub>2</sub> (%): C, 68.09; H, 6.01; N, 6.80; P, 3.79; S, 7.73. HRMS (MALDI-TOF) *m/z* for C<sub>47</sub>H<sub>49</sub>N<sub>4</sub>O<sub>4</sub>PS<sub>2</sub>: calc. 828.29 [M]<sup>+</sup>, found 851.31 [M+Na]<sup>+</sup>, 867.32 [M+K]<sup>+</sup>.

### The X-ray diffraction data

The X-ray diffraction data for the crystals of compound **7a** was collected on a Rigaku XtaLab Synergy S instrument with a HyPix detector and a PhotonJet microfocus X-ray tube using Cu Kα (1.54184 Å) radiation at low temperature. Images were indexed and integrated using the CrysAlisPro data reduction package. Data were corrected for systematic errors and absorption using the ABSPACK module: numerical absorption correction based on Gaussian integration over a multifaceted crystal model and empirical absorption correction based on spherical harmonics according to the point group symmetry using equivalent reflections. The GRAL module was used for analysis of systematic absences and space group determination.

The X-ray diffraction data for the crystals compound **7b** were collected on a Smart Apex II automatic diffractometer using graphite monochromated radiation. The structures **7a,b** was solved by direct methods using SHELXT [3] and refined by the full-matrix least-squares on F<sup>2</sup> using SHELXL. Non-hydrogen atoms were refined anisotropically. The hydrogen atoms were inserted at the calculated positions and refined as riding atoms. All the non-hydrogen atoms

were refined with anisotropic atomic displacement parameters. All figures were made using the program OLEX2 [4]. Crystallographic data for the structures **7a**,**b** reported in this paper have been deposited with the Cambridge Crystallographic Data Center (deposit number is 2266198 - **7a**; 1957500 - **7b**).

Compounds **7a** and **b** crystallize in the centrosymmetric space group *P*-1. The bond lengths, valence and torsion angles in the molecules of compounds **7a**,**b** in the crystal are in the ranges of characteristic values for the corresponding types of bonds. The compound **7a** crystallizes with two molecules in an independent part of the unit cell. The geometry of independent molecules differs very slightly in the configuration of the substituent, in which the phenyl fragment rotated differently relative to the plane of the urea fragment (the angles between the planes are 19.3(3)° and 9.8(2)° in different molecules). Meanwhile only the benzene ring of the substituent comes out of the plane. In molecules **7b** the curvature of the urea substituent is almost the same (the angle between the planes is 23.86(7)°), however the curvature does not occur along the nitrogen atom, as in **7a**, but along the carbonyl carbon atom. The N-H...O and C-H...O bonds stabilizing the conformations of these substituents are almost the same, the N...N distances are 2.719(7) Å, distances C...O - 2.85 (1) Å. The main difference in the geometry of the molecules of compounds **7a** and **17** in crystals is the reversal of the diaminopyridine substituent relative to the rest of the molecule – the angles between the plane of the substituent and P-C bond are 121.1(2)° and 121.9(2)° in **7a** and 101.1(1)° in **7b**. Meanwhile no additional intramolecular interactions were detected in **7b**. The presence of a large number of hydrogen binding centers leads to the formation of the crystal packing of both compounds due to hydrogen bonds. The independent molecules in **7a** form infinite chains in which the molecules are bonded by two classical NH...O hydrogen bonds: between one of the H-atoms of the amino group and carbonyl oxygen and the hydrogen atom of the NH group and the carbonyl oxygen atom. The second hydrogen atom of the amino group and the hydrogen of the OH group are bound to DMSO molecules which are localized between the chains of molecules (SI, table S1).

An infinite ribbon of centrosymmetric hydrogen-bonded dimers is formed in crystal of compound **7b**. Their formation occurs due to the bonding of hydrogen atoms of the NH groups and carboxylic oxygens. Dimers crosslinking is carried out due to the O-H...O interactions between hydroxyl hydrogen and phosphoryl oxygen. One of the hydrogen atoms of the amino groups is bound to the solvate molecules of DMSO, thereby embedded in the ribbons (SI, table S2). The other H-atom is directed towards the aromatic fragment of di-*tert*-butylphenol with a distance to the nearest carbon atom of 2.500(3) Å, and to the centroid of the cycle of 3.1708(2) Å, which further stabilizes the conformation of the molecule.

Thus, the crystal structure of both compounds is formed due to hydrogen bonds and consists of columns or ribbons directed parallel to the 0a axis and connected in a three-dimensional grid.

Crystal Data for **7a**: C<sub>33</sub>H<sub>51</sub>N<sub>4</sub>O<sub>7</sub>PS<sub>2</sub> (*M* = 710.86 g/mol): triclinic, space group *P*-1 (no. 2), *a* = 9.1479(3) Å, *b* = 15.6620(3) Å, *c* = 26.1825(3) Å,  $\alpha$  = 90.5049(12)°,  $\beta$  = 90.946(2)°,  $\gamma$  = 92.230(2)°, *V* = 3747.73(15) Å<sup>3</sup>, *Z* = 4, *T* = 100.00(10) K,  $\mu$ (CuK $\alpha$ ) = 2.096 mm<sup>-1</sup>, *D*<sub>calc</sub> = 1.260 g/cm<sup>3</sup>, 108799 reflections measured (5.648° ≤ 2 $\Theta$  ≤ 153.844°), 14950 unique (*R*<sub>int</sub> = 0.1633, *R*<sub>sigma</sub> = 0.0588) which were used in all calculations. The final *R*<sub>1</sub> was 0.1187 (*I* > 2 $\sigma$ (*I*)) and *wR*<sub>2</sub> was 0.3234 (all data).

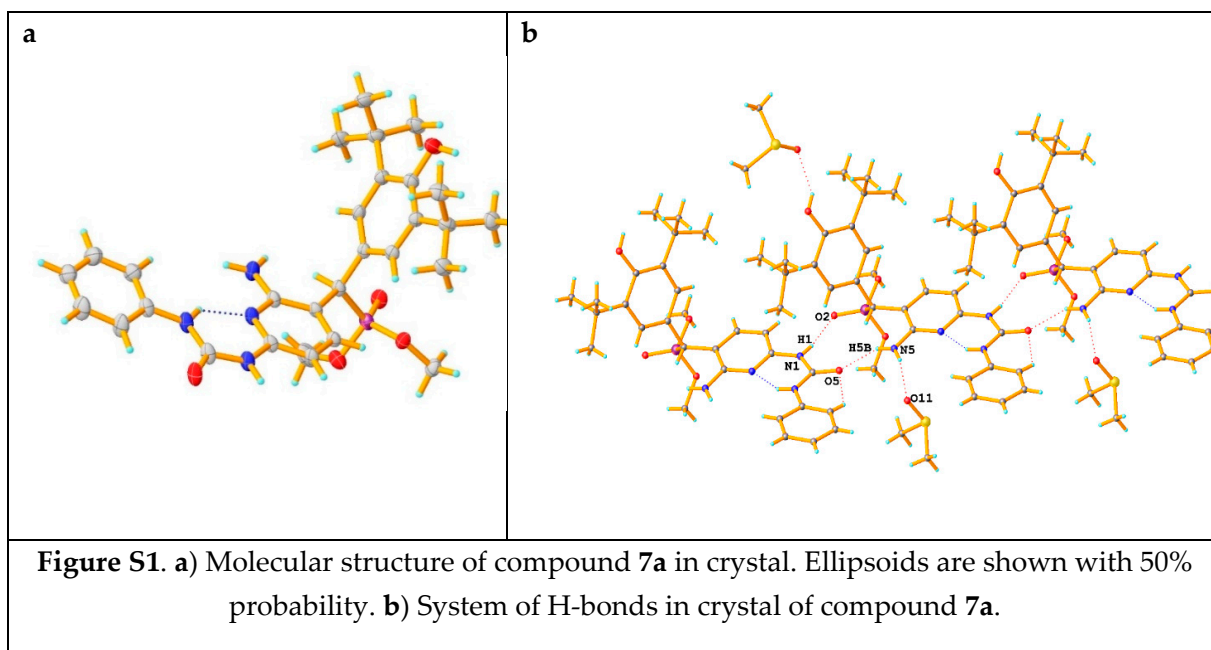

**Table S1.** H-bonds in crystal of compound **7a**

|                |           | D - H | H...A | D...A    | D - H...A |
|----------------|-----------|-------|-------|----------|-----------|
| O7-H7... S1'   |           | 0.840 | 3.008 | 3.389(5) | 110.09    |
| O7-H7... O13'  |           | 0.840 | 2.029 | 2.698(8) | 136.02    |
| N1-H1... O2    | x-1, y, z | 0.880 | 2.003 | 2.872(7) | 169.32    |
| N2-H2... N7    |           | 0.880 | 2.009 | 2.719(7) | 136.90    |
| N5-H5A... O11  |           | 0.880 | 2.051 | 2.894(8) | 159.93    |
| N5-H5A... S2'  |           | 0.880 | 2.875 | 3.578(9) | 138.08    |
| N5-H5B... O5   | x+1, y, z | 0.880 | 2.180 | 2.978(8) | 150.66    |
| C12-H12... O5  | x+1, y, z | 1.000 | 2.257 | 3.243(8) | 168.41    |
| C12-H12... N5  |           | 1.000 | 2.388 | 2.906(8) | 111.36    |
| C20-H20... O2  | x-1, y, z | 0.950 | 2.515 | 3.271(7) | 136.58    |
| C38-H38... O11 |           | 0.950 | 2.581 | 3.393(7) | 143.55    |
| C50-H50... O5  |           | 0.950 | 2.245 | 2.855(8) | 121.22    |

|                   |                  |       |       |          |        |
|-------------------|------------------|-------|-------|----------|--------|
| O4-H4... S7'      |                  | 0.840 | 3.028 | 3.717(8) | 140.80 |
| O4-H4... O15'     |                  | 0.840 | 1.845 | 2.649(9) | 159.89 |
| O4-H4... O14''    |                  | 0.840 | 2.203 | 2.701(8) | 118.01 |
| N3-H3A... O12     |                  | 0.880 | 2.004 | 2.861(6) | 164.40 |
| N3-H3A... S4''    |                  | 0.880 | 2.997 | 3.709(9) | 139.33 |
| N3-H3B... O10     | x+1, y, z        | 0.880 | 2.239 | 3.018(8) | 147.42 |
| N4-H4A... O6      | x-1, y, z        | 0.880 | 2.012 | 2.871(8) | 165.08 |
| N6-H6... N8       |                  | 0.880 | 2.013 | 2.719(7) | 136.36 |
| C25-H25... O10    | x+1, y, z        | 1.000 | 2.229 | 3.215(8) | 168.47 |
| C25-H25... N3     |                  | 1.000 | 2.409 | 2.909(7) | 110.08 |
| C28-H28... O6     | x-1, y, z        | 0.950 | 2.542 | 3.294(8) | 136.26 |
| C56-H56... O10    |                  | 0.950 | 2.257 | 2.85(1)  | 119.71 |
| C67'-H67C'... S3' | -x, -y, -z       | 0.980 | 3.017 | 3.690(8) | 126.92 |
| C65-H65A'... N7   | -x+1, -y+1, -z+1 | 0.980 | 2.544 | 3.491(8) | 162.43 |
| C65-H65D''... N1  | -x+1, -y+1, -z+1 | 0.980 | 2.560 | 3.537(8) | 175.11 |
| C63-H63A'... N6   |                  | 0.980 | 2.698 | 3.550(6) | 145.53 |
| C63-H63E''... N3  | -x, -y, -z       | 0.980 | 2.504 | 3.461(9) | 165.38 |
| C63-H63F''... N6  |                  | 0.980 | 2.608 | 3.550(7) | 161.26 |

Crystal data for **7b**: C<sub>31</sub>H<sub>43</sub>N<sub>4</sub>O<sub>5</sub>P\*(CH<sub>3</sub>)<sub>2</sub>SO, M = 660.79, colorless crystal, triclinic, space group P-1, Z = 2, a=10.0771(8), b=13.8844(10), c=13.8959(11)Å, α=68.025(2), β=82.413(2), γ=77.857(2)°, V = 1759.6(2) Å<sup>3</sup>, \*calc = 1.247 g/cm<sup>3</sup>, \* = 0.185 mm<sup>-1</sup>, 14008 reflections collected (±h, ±k, ±l), 6875 independent (*R*<sub>int</sub> = 0.0426) and 4452 observed reflections [*I* ≥ 2 σ(*I*)], 434 refined parameters, *R* = 0.0609, *wR*<sup>2</sup> = 0.1686, residual electron density 0.58 (-0.44)eÅ<sup>-3</sup>.

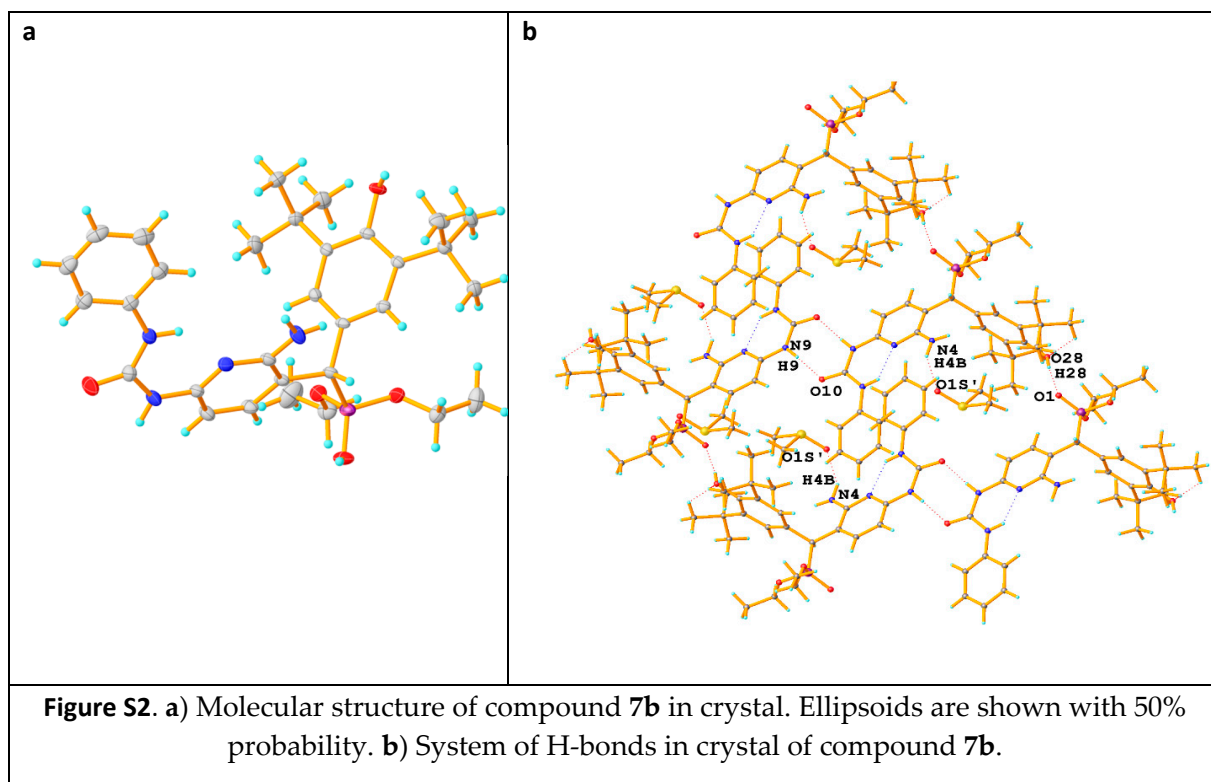

**Table S2.** H-bonds in crystal of compound **7b**

| H-bond         | Symmetry equivalent | D - H | H...A | D...A    | D - H...A |
|----------------|---------------------|-------|-------|----------|-----------|
| N4-H4B...S1S   | 1-x,1-y,1-z         | 0.97  | 2.84  | 3.469(7) | 124       |
| N4-H4B...O1S'  | 1-x,1-y,1-z         | 0.97  | 2.11  | 2.98(4)  | 149       |
| N4-H4B...O1S   | 1-x,1-y,1-z         | 0.97  | 2.01  | 2.86(6)  | 146       |
| N4-H4B...O1S'' | 1-x,1-y,1-z         | 0.97  | 2.08  | 2.95(5)  | 150       |
| N9-H9...O10    | 2-x,1-y,-z          | 0.89  | 1.98  | 2.865(4) | 175       |
| N11-H11...N5   |                     | 0.89  | 2.04  | 2.753(4) | 136       |
| O28-H28...O1   | -1+x,y,z            | 0.98  | 1.79  | 2.680(3) | 150       |
| C2-H2...O1S    | [1555.03]           | 1.00  | 2.51  | 3.48(5)  | 166       |
| C2-H2...O1S''  | [1555.04]           | 1.00  | 2.52  | 3.49(5)  | 163       |
| C8-H8...O33    |                     | 0.95  | 2.51  | 3.147(5) | 124       |
| C13-H13...O10  |                     | 0.95  | 2.28  | 2.878(4) | 120       |

|                |                     |       |       |          |           |
|----------------|---------------------|-------|-------|----------|-----------|
| C25-H25A...O28 |                     | 0.98  | 2.26  | 2.920(4) | 124       |
| C26-H26A...O28 |                     | 0.98  | 2.36  | 3.003(4) | 122       |
| C30-H30C...O1  | -1+x,y,z            | 0.98  | 2.37  | 3.341(4) | 172       |
| C31-H31B...O28 |                     | 0.98  | 2.25  | 2.902(3) | 123       |
| C34-H34A...O28 | 1+x,y,z             | 0.99  | 2.51  | 3.445(5) | 157       |
| H-bond         | Symmetry equivalent | D - H | H...A | D...A    | D - H...A |

### Electrochemical measurements

On cyclic voltammetry compound **8b** (Figure S5) also, after the addition of increasing amounts of trifluoroacetic acid shows that the OH group, despite the close location of the oxidation peaks with the pyridine fragment is oxidized slightly more positively. As shown above, although compound **8b** exhibits biological activity, it is inferior in selectivity to the leader compound **17b** - this is directly related to the fact that the oxidation process into the quinone form is slowed down by parallel processes in the molecule.

The CV of the oxidation of compound **17b** shows that oxEp1 corresponds to the OH group because the first oxidation peak increases with increasing amounts of acid (Figure S6).

Lipid peroxidation inhibition, oxygen radical scavenging capacity and DPPH anti-radical activity of test compounds and DPPH values expressed in TE showed differences between compounds **14b** and **17b**. We compared these compounds on iSDLSV curves (Figure S7).

It is important to note that **17b** does not change the shape of the re-reductive wave on the semi-differential CV both in the presence and in the absence of acid. The reverse semi-differential wave (or iSDLSV) of the compound under study should not change shape in the presence of acid, since the phenol-quinone equilibrium could be disrupted.

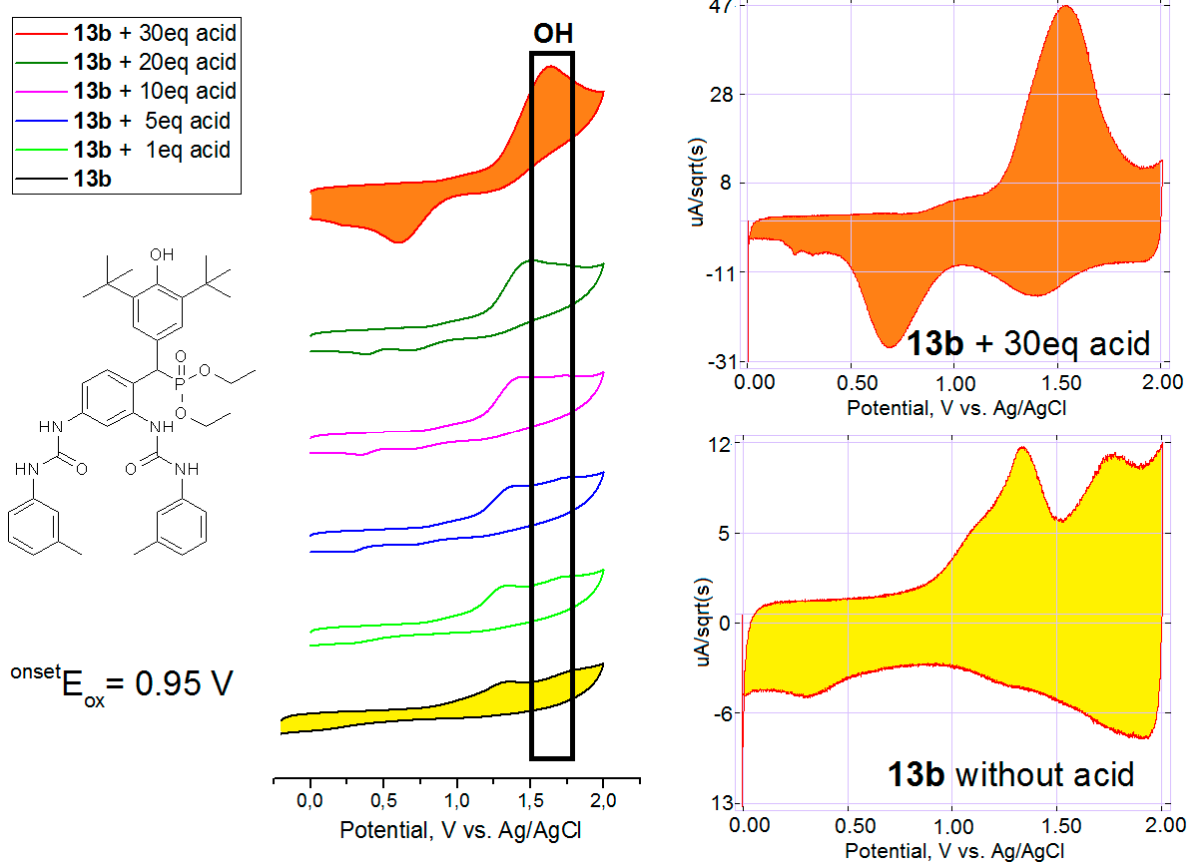

**Figure S3.** Cyclic voltammogram for oxidation of compound **13b** (left). Semi-derivative of CV for oxidation of **13b**. Conditions: 0.1 mM CH<sub>3</sub>CN (0.1 M Bu<sub>4</sub>NBF<sub>4</sub>); Potentials vs. Ag/AgCl; Work electrode: GC; Scan rate: 0.1 V/s



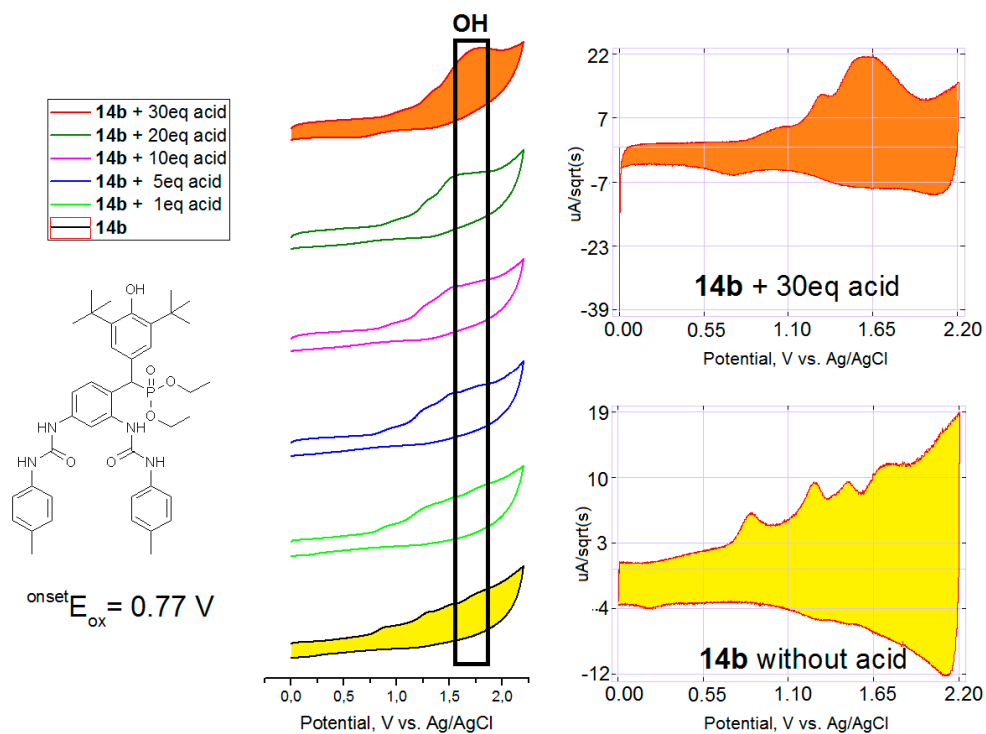

**Figure S4** Cyclic voltammogram for oxidation of compound **14b** (left). Semi-derivative of CV for oxidation of **14b**. Conditions: 0.1 mM CH<sub>3</sub>CN (0.1 M Bu<sub>4</sub>NBF<sub>4</sub>); Potentials vs. Ag/AgCl; Work electrode: GC; Scan rate: 0.1 V/s

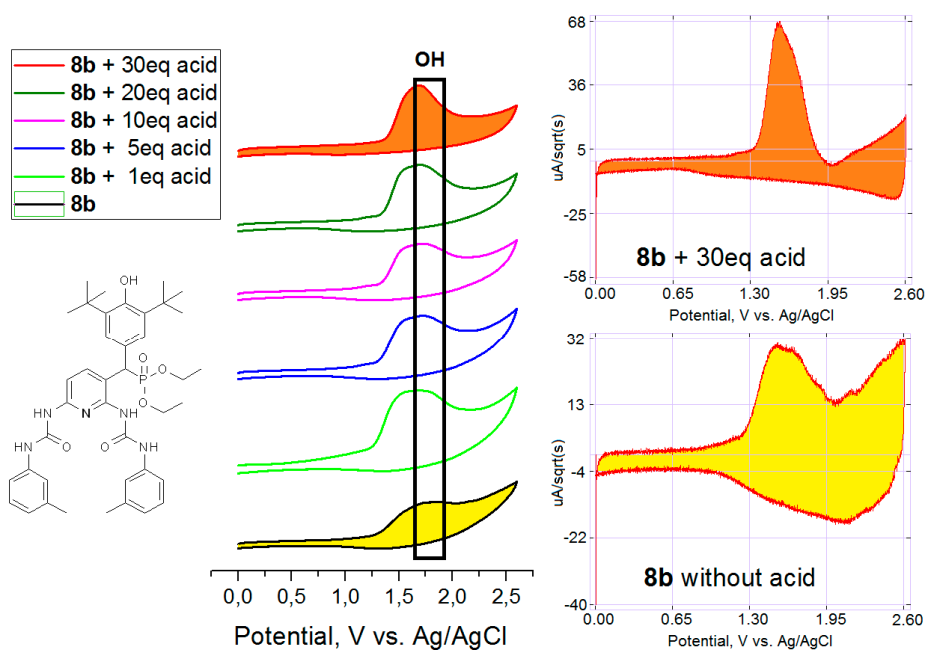

**Figure S5.** Cyclic voltammogram for oxidation of compound **8b** (left). Semi-derivative of CV for oxidation of **8b**. Conditions: 0.1 mM CH<sub>3</sub>CN (0.1 M Bu<sub>4</sub>NBF<sub>4</sub>); Potentials vs. Ag/AgCl; Work electrode: GC; Scan rate: 0.1 V/s

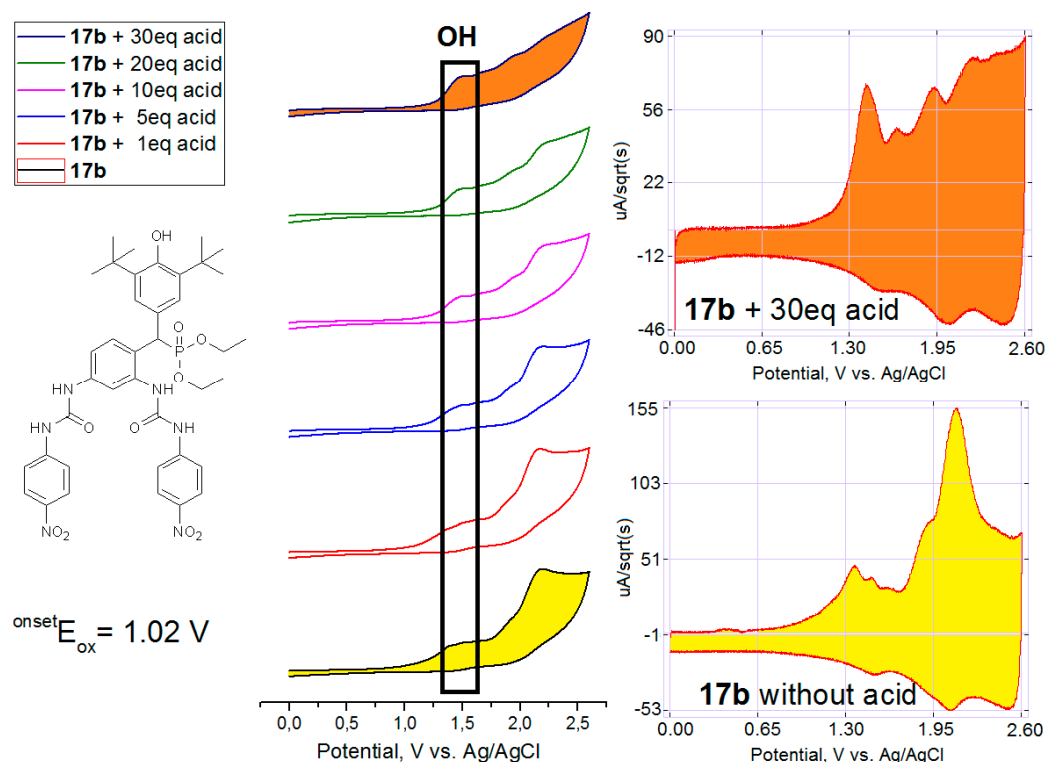

**Figure S6.** Cyclic voltammogram for oxidation of compound **17b** (left). Semi-derivative of CV for oxidation of **17b**. Conditions: 0.1 mM  $\text{CH}_3\text{CN}$  (0.1 M  $\text{Bu}_4\text{NBF}_4$ ); Potentials vs. Ag/AgCl; Work electrode: GC ; Scan rate: 0.1 V/s

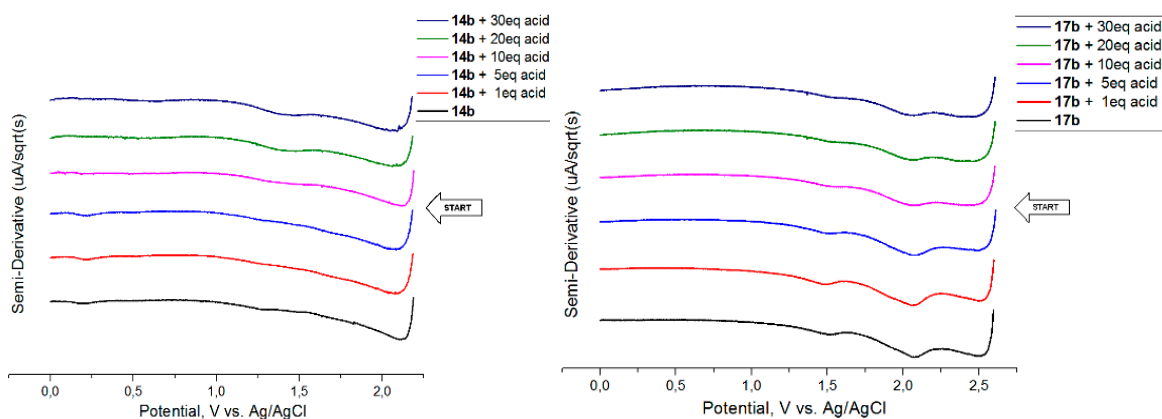

**Figure S7.** iSDLV for reduction of the oxidized compounds **14b** and **17b**. Conditions: 0.1 mM  $\text{CH}_3\text{CN}$  (0.1 M  $\text{Bu}_4\text{NBF}_4$ ); Potentials vs. Ag/AgCl; Work electrode: GC

### Cartesian Coordinates

**Computational Details.** All quantum chemical calculations were performed by the Gaussian16 program package<sup>1</sup> using (U)M06-2X/6-311++G(d, p) level of theory [5–7] and atom-pairwise

dispersion correction with the Becke-Johnson damping scheme (D3) [8,9]. All calculations were performed using SMD solvation correction method of choice for water. TightSCF convergence criteria was applied throughout. Numerical harmonic frequency calculations were used to obtain thermodynamic quantities and to verify that all stationary points found were local minima.

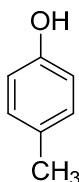

**p - Cresol (C<sub>7</sub>H<sub>8</sub>O)**

# Of imaginary frequencies = 0

E = -346.732914616 Eh

Symmetry C<sub>1</sub>

Charge 0 Multiplicity 1

|   |              |              |              |
|---|--------------|--------------|--------------|
| C | 0.641764000  | -1.198701000 | -0.004301000 |
| C | 1.375717000  | -0.013254000 | -0.004687000 |
| C | 0.667703000  | 1.193388000  | -0.004273000 |
| C | -0.720658000 | 1.220226000  | -0.000679000 |
| C | -1.430480000 | 0.021460000  | 0.001577000  |
| C | -0.752052000 | -1.191647000 | -0.000678000 |
| H | 1.164285000  | -2.149708000 | -0.007732000 |
| H | 1.214831000  | 2.130952000  | -0.007667000 |
| H | -1.263066000 | 2.158750000  | -0.001435000 |
| H | -1.313234000 | -2.120455000 | -0.001447000 |
| C | 2.882147000  | -0.019869000 | 0.005424000  |
| H | 3.268381000  | 0.355920000  | 0.956791000  |
| H | 3.269083000  | -1.029304000 | -0.140514000 |
| H | 3.282660000  | 0.619546000  | -0.784576000 |
| O | -2.803976000 | 0.095036000  | 0.003677000  |
| H | -3.175984000 | -0.795597000 | 0.002869000  |

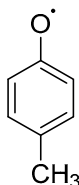

**p - Cresol radical (C<sub>7</sub>H<sub>7</sub>O)**

# Of imaginary frequencies = 0

E = -346.093876275 Eh

Symmetry C<sub>1</sub>

Charge 0 Multiplicity 2

|   |              |              |              |
|---|--------------|--------------|--------------|
| C | 0.587920000  | -1.220772000 | -0.012962000 |
| C | 1.305959000  | 0.000126000  | -0.014843000 |
| C | 0.587835000  | 1.220910000  | -0.012958000 |
| C | -0.778792000 | 1.236199000  | -0.002512000 |
| C | -1.532104000 | -0.000034000 | 0.003898000  |
| C | -0.778667000 | -1.236211000 | -0.002509000 |
| H | 1.145009000  | -2.151338000 | -0.020443000 |
| H | 1.144811000  | 2.151538000  | -0.020430000 |
| H | -1.337854000 | 2.164991000  | -0.001616000 |
| H | -1.337641000 | -2.165055000 | -0.001627000 |
| C | 2.797950000  | -0.000005000 | 0.012971000  |
| H | 3.143611000  | -0.003681000 | 1.053315000  |
| H | 3.202156000  | -0.890383000 | -0.470068000 |
| H | 3.202387000  | 0.893398000  | -0.464176000 |

O -2.787886000 -0.000093000 0.012317000

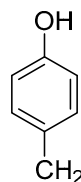

**p - Cresol anion (C<sub>7</sub>H<sub>7</sub>O)**

# Of imaginary frequencies = 0

E = -346.180516318 Eh

Symmetry C<sub>1</sub>

Charge -1 Multiplicity 1

|   |              |              |              |
|---|--------------|--------------|--------------|
| C | 0.725337000  | 1.201363000  | -0.002328000 |
| C | 1.495354000  | -0.010315000 | 0.001782000  |
| C | 0.698943000  | -1.203486000 | -0.002601000 |
| C | -0.690252000 | -1.181758000 | -0.001516000 |
| C | -1.386733000 | 0.023763000  | 0.000256000  |
| C | -0.662070000 | 1.212995000  | -0.001555000 |
| H | 1.252857000  | 2.151135000  | -0.002795000 |
| H | 1.203198000  | -2.165731000 | -0.003328000 |
| H | -1.245753000 | -2.116632000 | -0.003171000 |
| H | -1.197278000 | 2.158232000  | -0.003105000 |
| C | 2.902270000  | -0.024224000 | 0.018686000  |
| H | 3.465170000  | 0.900772000  | -0.041215000 |
| H | 3.447572000  | -0.959751000 | -0.040144000 |
| O | -2.785771000 | 0.091057000  | 0.001783000  |
| H | -3.136685000 | -0.806509000 | 0.003154000  |

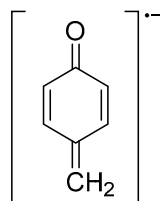

**p - Quinone methide (C<sub>7</sub>H<sub>6</sub>O)**

# Of imaginary frequencies = 0

E = Eh

Symmetry C<sub>1</sub>

Charge 0 Multiplicity 1

|   |              |              |             |
|---|--------------|--------------|-------------|
| C | 0.637915000  | -1.248095000 | 0.000000000 |
| C | 1.392471000  | 0.000000000  | 0.000000000 |
| C | 0.637915000  | 1.248095000  | 0.000000000 |
| C | -0.705377000 | 1.254280000  | 0.000000000 |
| C | -1.466475000 | 0.000000000  | 0.000000000 |
| C | -0.705377000 | -1.254280000 | 0.000000000 |
| H | 1.201390000  | -2.175592000 | 0.000000000 |
| H | 1.201390000  | 2.175592000  | 0.000000000 |
| H | -1.276144000 | 2.175800000  | 0.000000000 |
| H | -1.276144000 | -2.175800000 | 0.000000000 |
| C | 2.736961000  | 0.000000000  | 0.000000000 |

|   |              |              |             |
|---|--------------|--------------|-------------|
| H | 3.295492000  | -0.929895000 | 0.000000000 |
| H | 3.295492000  | 0.929895000  | 0.000000000 |
| O | -2.701209000 | 0.000000000  | 0.000000000 |

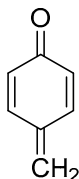

**p - Quinone methide radical anion (C<sub>7</sub>H<sub>6</sub>O)**

# Of imaginary frequencies = 0

E = -345.594284851 Eh

Symmetry CS

Charge -1 Multiplicity 2

|   |              |              |              |
|---|--------------|--------------|--------------|
| C | -0.000156000 | 0.653790000  | 1.210867000  |
| C | 0.000538000  | 1.413647000  | 0.000000000  |
| C | -0.000156000 | 0.653790000  | -1.210867000 |
| C | -0.000156000 | -0.721195000 | -1.211276000 |
| C | 0.000017000  | -1.483380000 | 0.000000000  |
| C | -0.000156000 | -0.721195000 | 1.211276000  |
| H | -0.000423000 | 1.190715000  | 2.155430000  |
| H | -0.000423000 | 1.190715000  | -2.155430000 |
| H | -0.000263000 | -1.266217000 | -2.150764000 |
| H | -0.000263000 | -1.266217000 | 2.150764000  |
| C | 0.000484000  | 2.811732000  | 0.000000000  |
| H | 0.000329000  | 3.367779000  | 0.929922000  |
| H | 0.000329000  | 3.367779000  | -0.929922000 |
| O | -0.000222000 | -2.778460000 | 0.000000000  |

**Oxygen triplet ( <sup>3</sup>O<sub>2</sub> )**

# Of imaginary frequencies = 0

E = -150.308322466 Eh

Symmetry C1

Charge 0 Multiplicity 3

|   |             |             |              |
|---|-------------|-------------|--------------|
| O | 0.000000000 | 0.000000000 | 0.593916000  |
| O | 0.000000000 | 0.000000000 | -0.593916000 |

**Oxygen radical anion (O<sub>2</sub>)**

# Of imaginary frequencies = 0

E = -150.420661509 Eh

Symmetry C1

Charge -1 Multiplicity 2

|   |             |             |              |
|---|-------------|-------------|--------------|
| O | 0.000000000 | 0.000000000 | 0.658816000  |
| O | 0.000000000 | 0.000000000 | -0.658816000 |

## NMR spectra of compounds

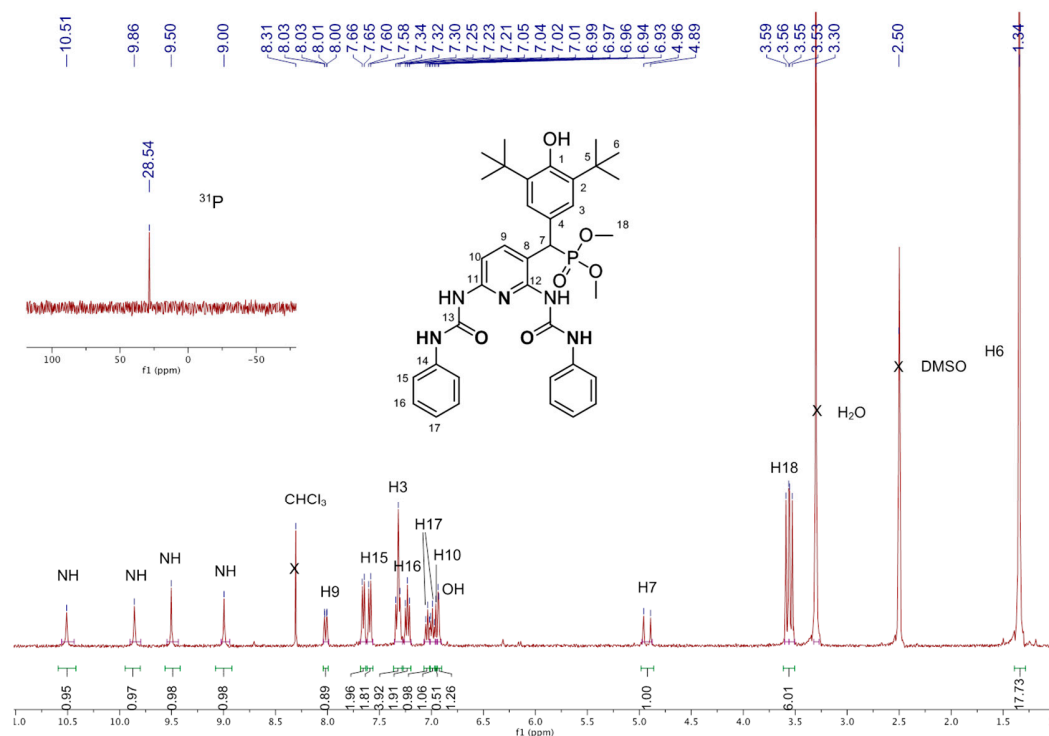

Figure S8.  $^1\text{H}$ -,  $^{31}\text{P}$ - NMR of compound 5a.

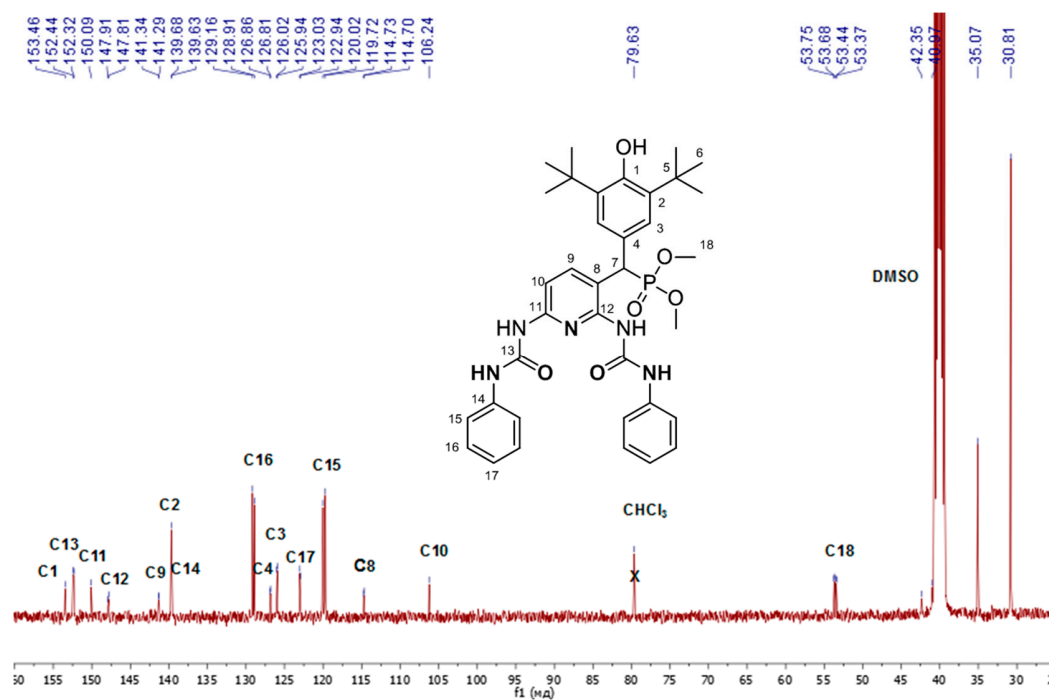

Figure S9.  $^{13}\text{C}$ - NMR of compound 5a.

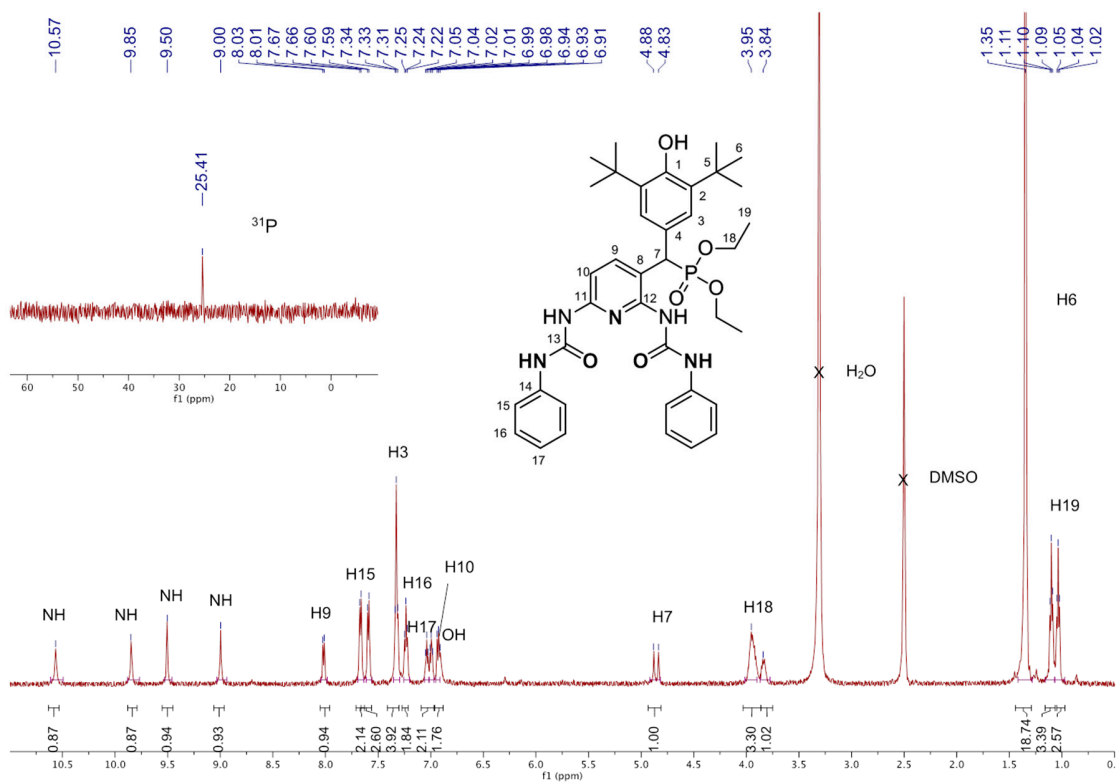

**Figure S10.** <sup>1</sup>H-, <sup>31</sup>P-NMR of compound **5b**.

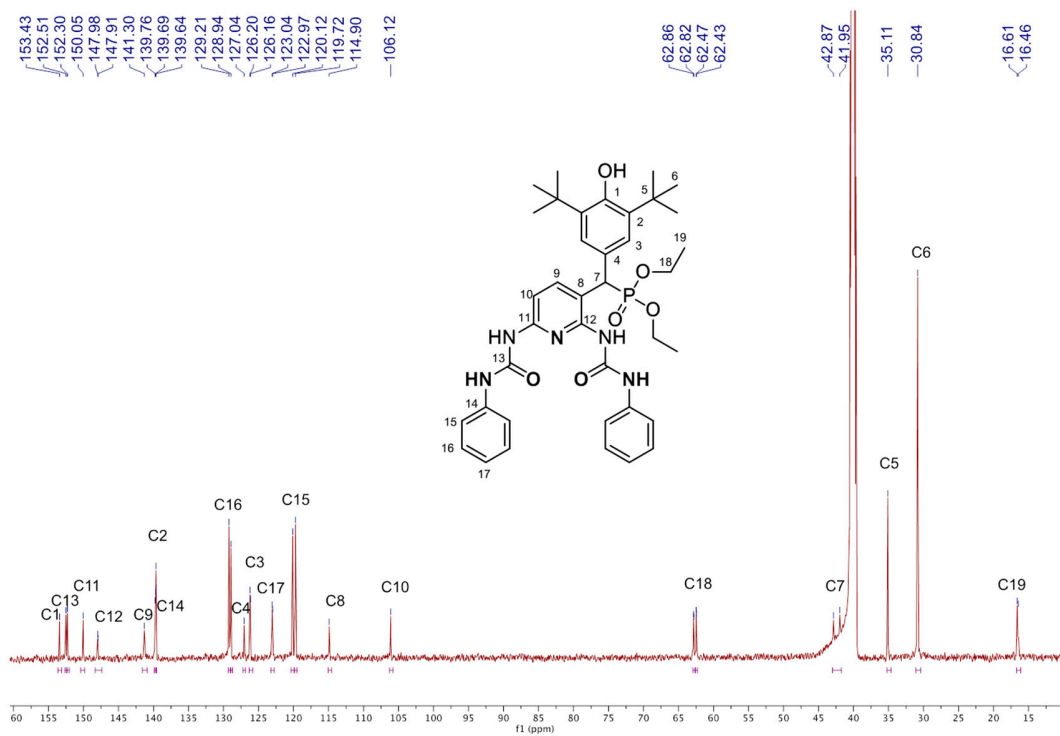

**Figure S11.** <sup>13</sup>C- NMR of compound **5b**.

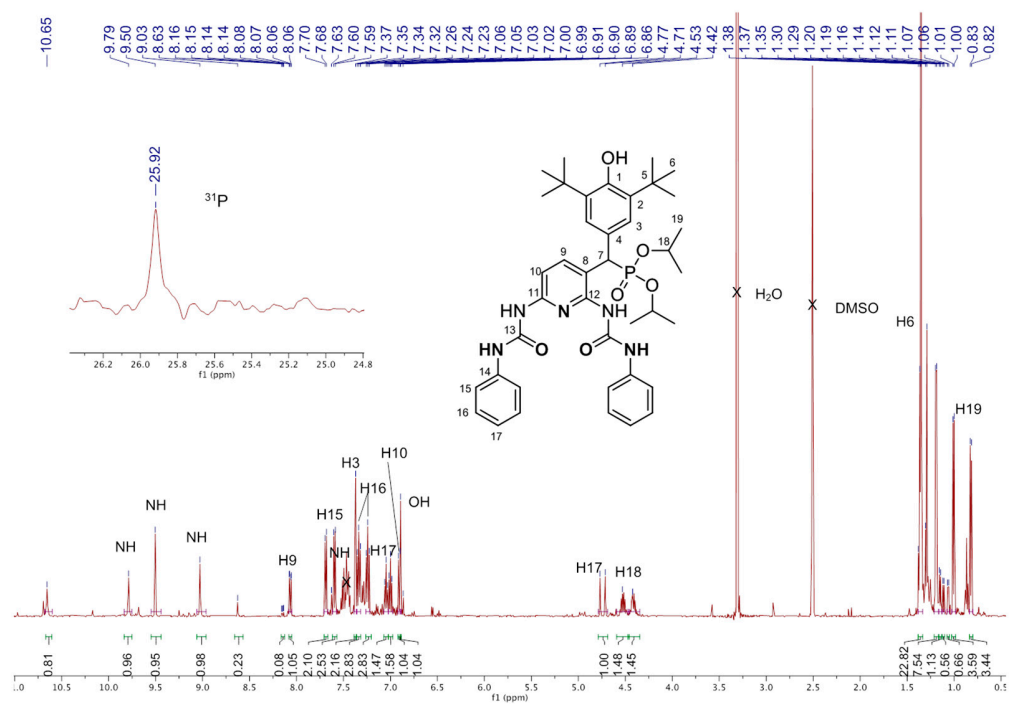

Figure S12.  $^1\text{H}$ -,  $^{31}\text{P}$ - NMR of compound 5c.

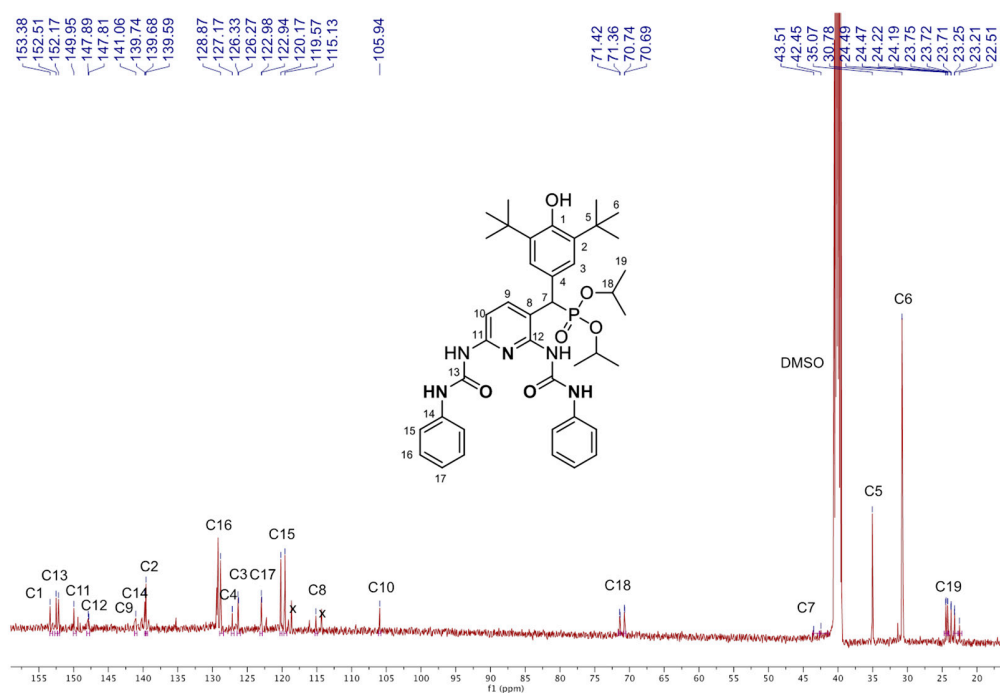

Figure S13.  $^{13}\text{C}$ - NMR of compound 5c.

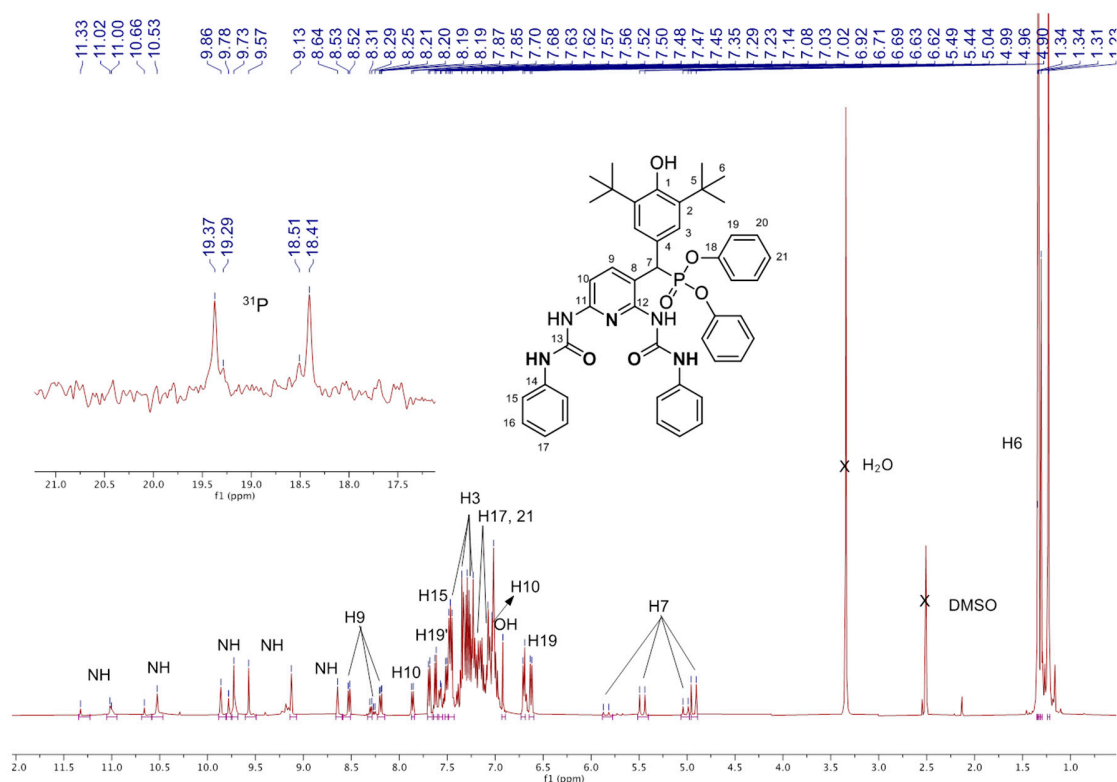

**Figure S14.**  $^1\text{H}$ -,  $^{31}\text{P}$ -NMR of compound 5d.

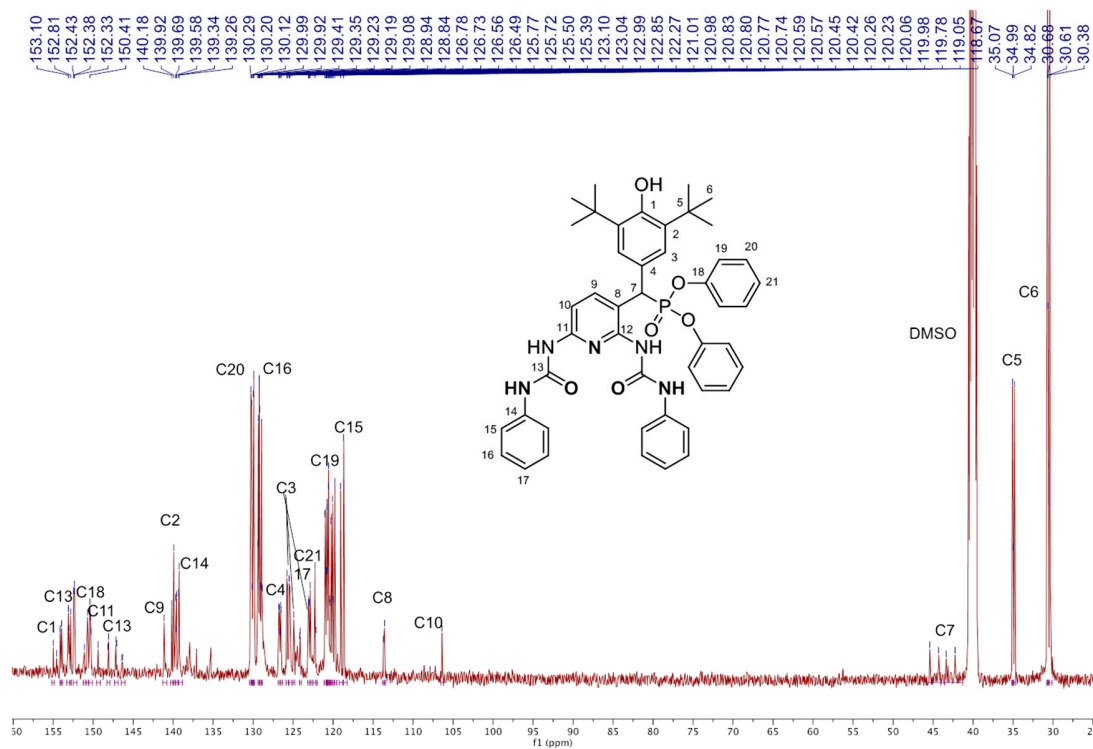

**Figure S15.**  $^{13}\text{C}$ - NMR of compound 5d.



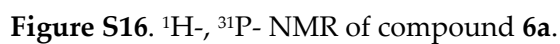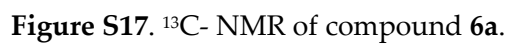

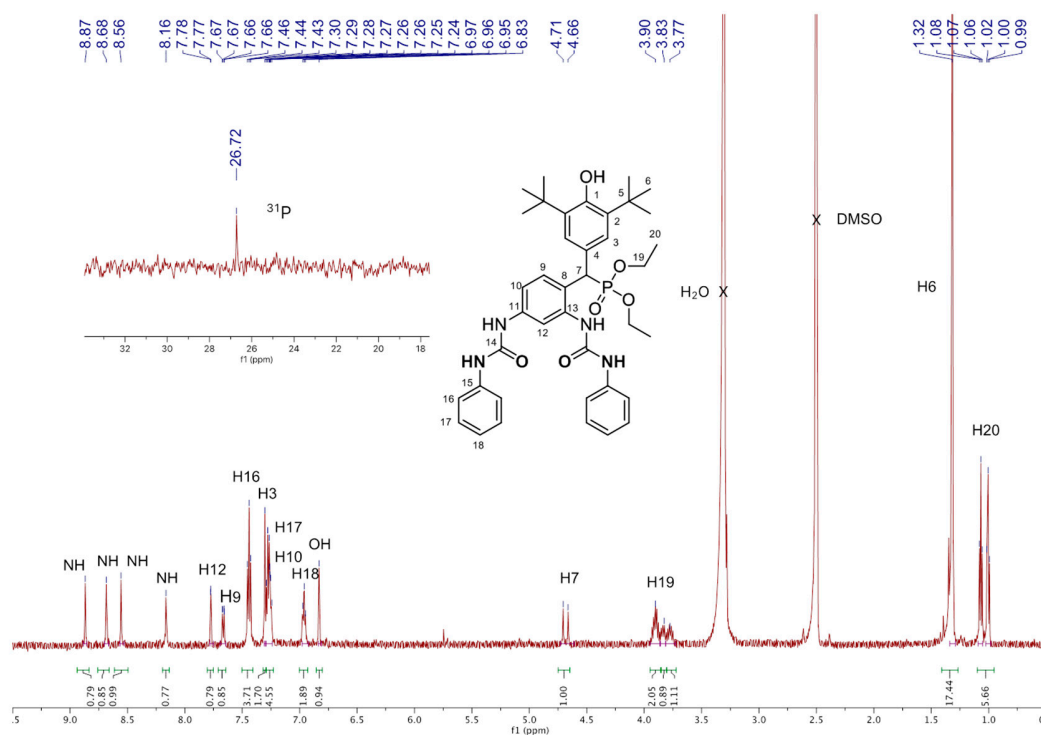

**Figure S18.** <sup>1</sup>H-, <sup>31</sup>P-NMR of compound **6b**.

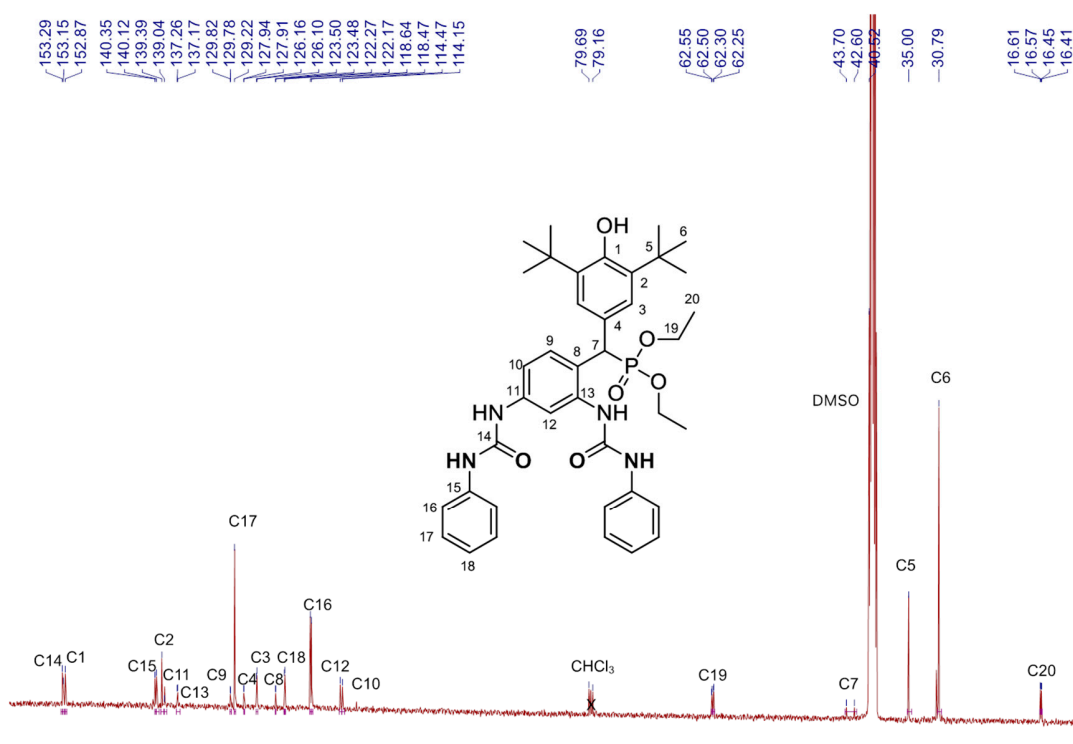

**Figure S19.** <sup>13</sup>C-NMR of compound **6b**.

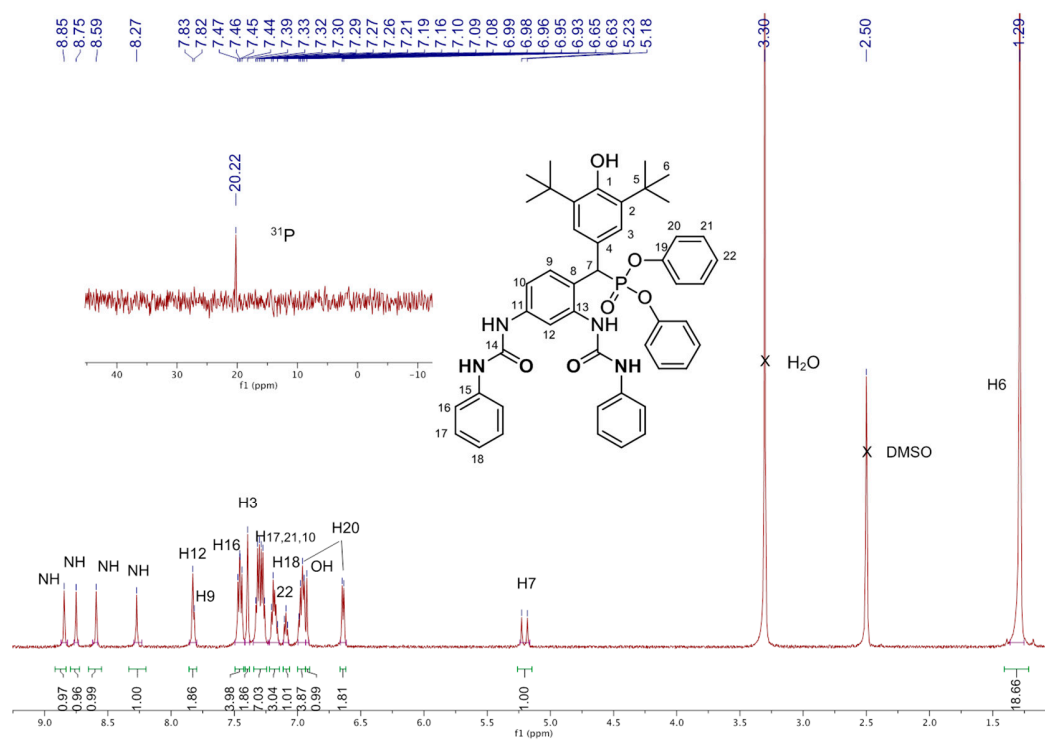

Figure S20. <sup>1</sup>H-, <sup>31</sup>P- NMR of compound 6d.

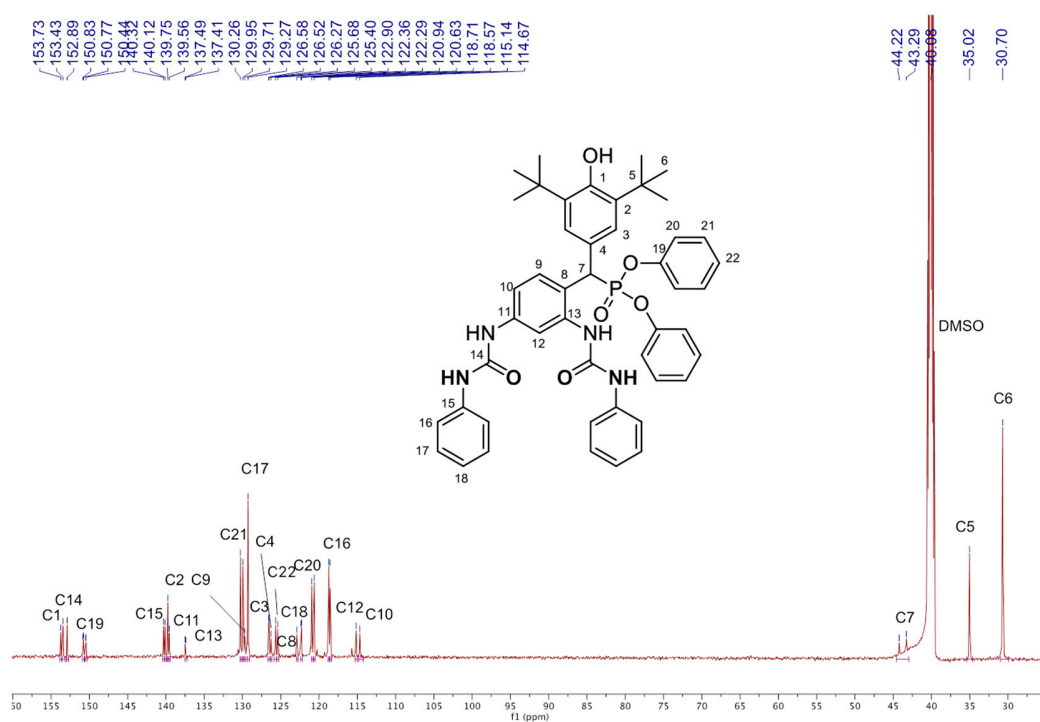

Figure S21. <sup>13</sup>C-NMR of compound 6d.

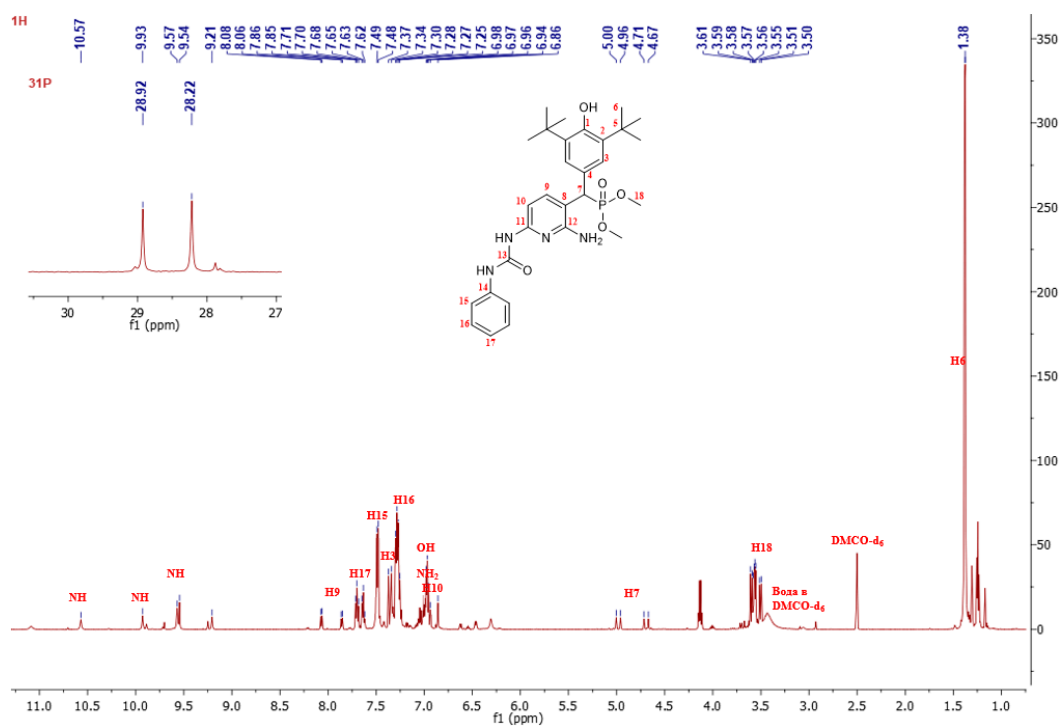

Figure S22. <sup>1</sup>H-, <sup>31</sup>P- NMR of compound 7a.

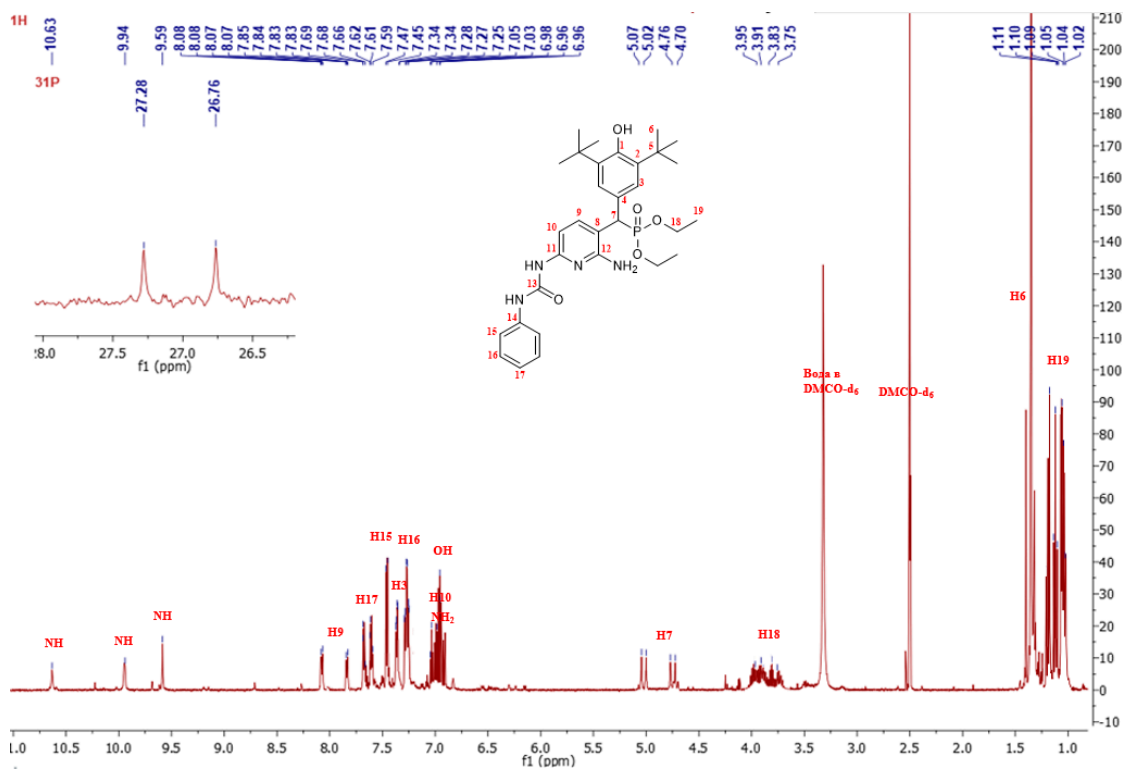

Figure S23. <sup>1</sup>H-, <sup>31</sup>P- NMR of compound 7b

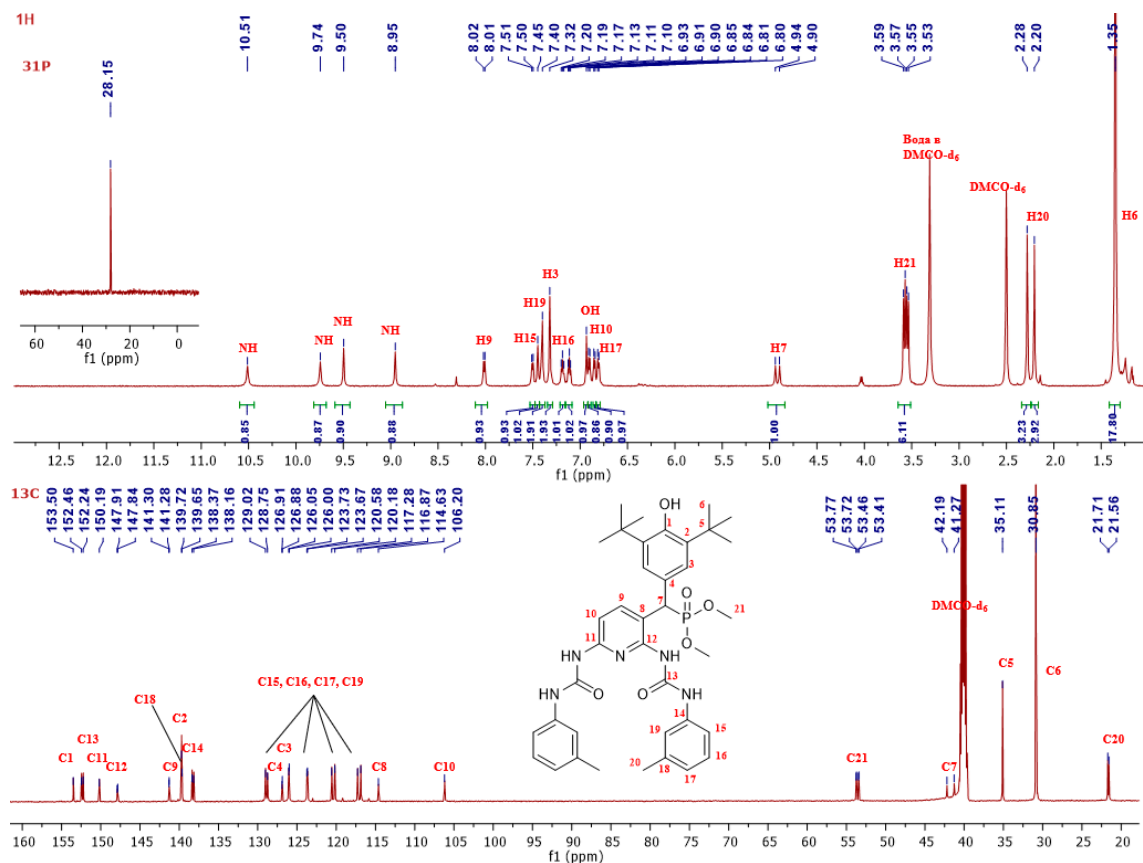

Figure S24. <sup>1</sup>H-<sup>31</sup>P-<sup>13</sup>C- NMR of compound 8a.

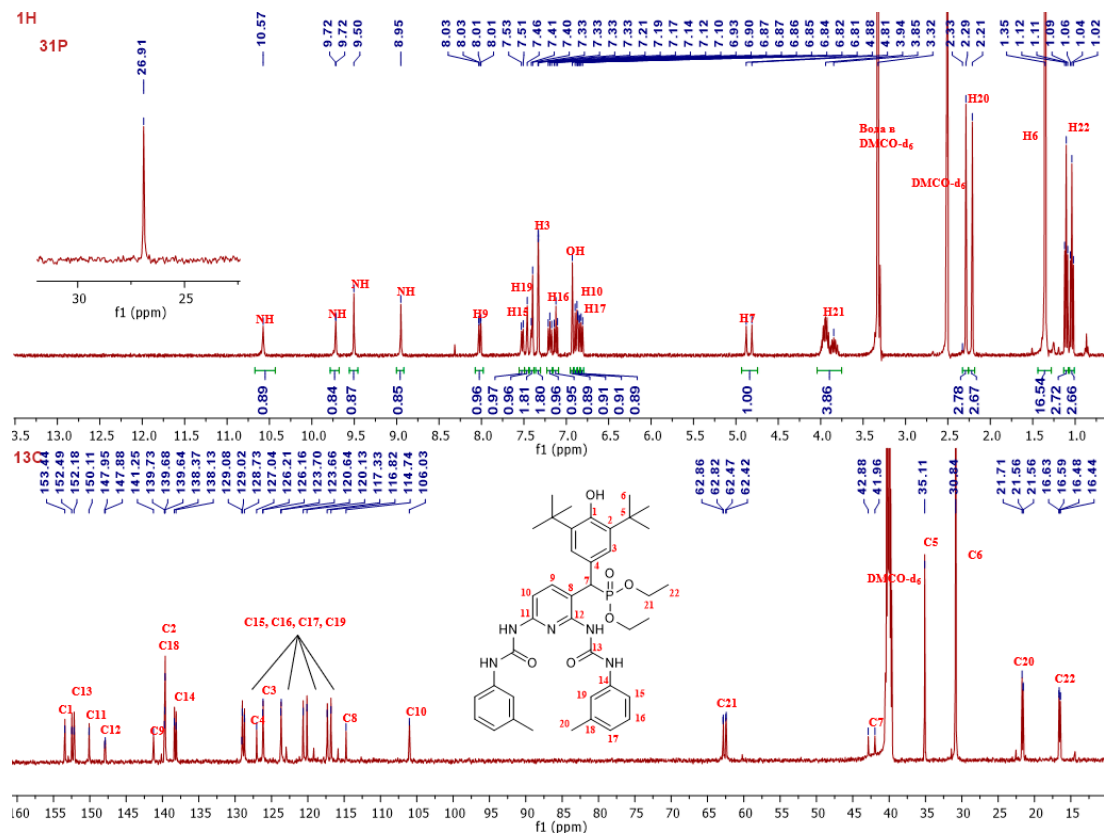

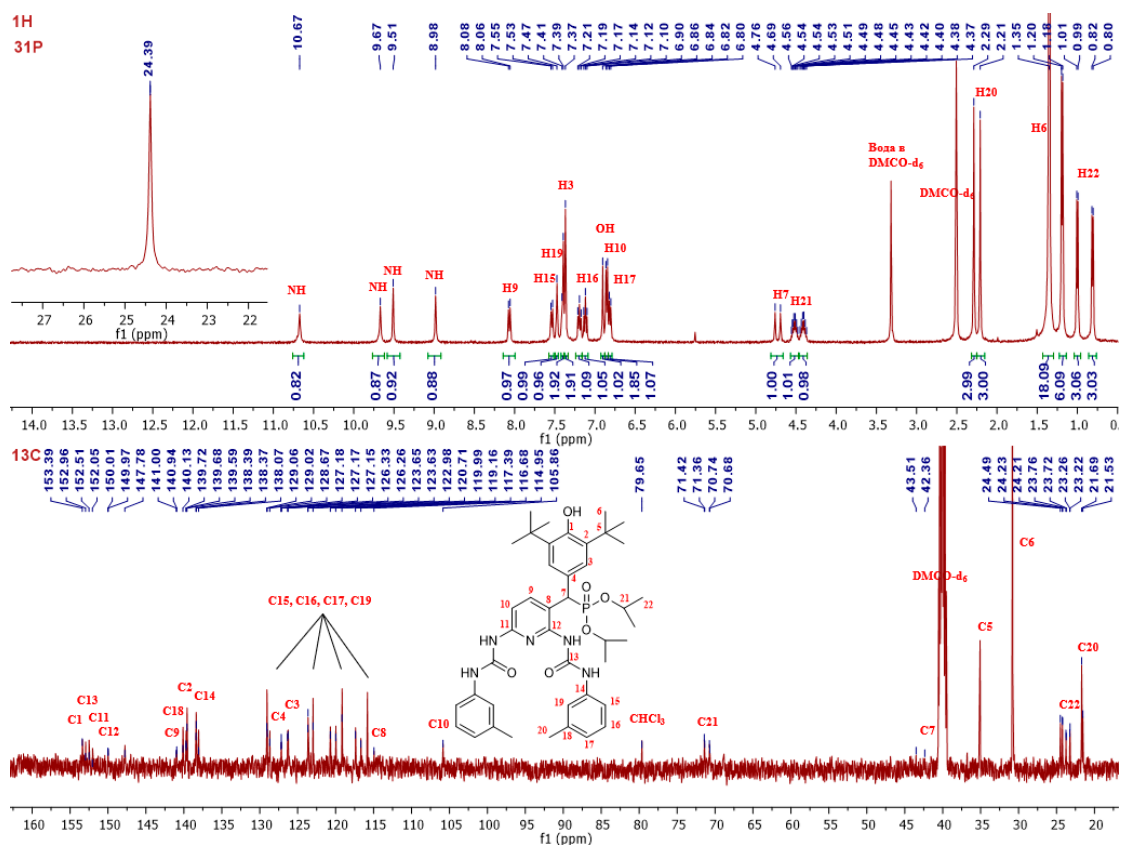

Figure S26. <sup>1</sup>H-<sup>31</sup>P-<sup>13</sup>C- NMR of compound 8c.

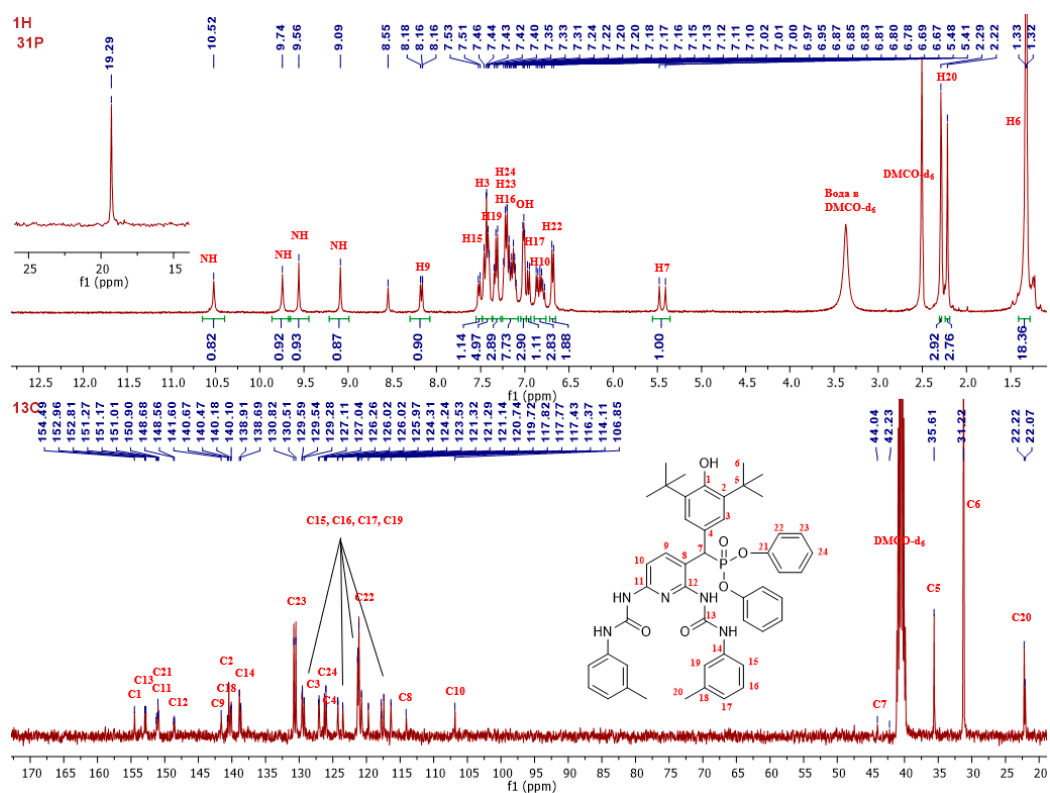

Figure S27. <sup>1</sup>H-<sup>31</sup>P-<sup>13</sup>C- NMR of compound 8d.

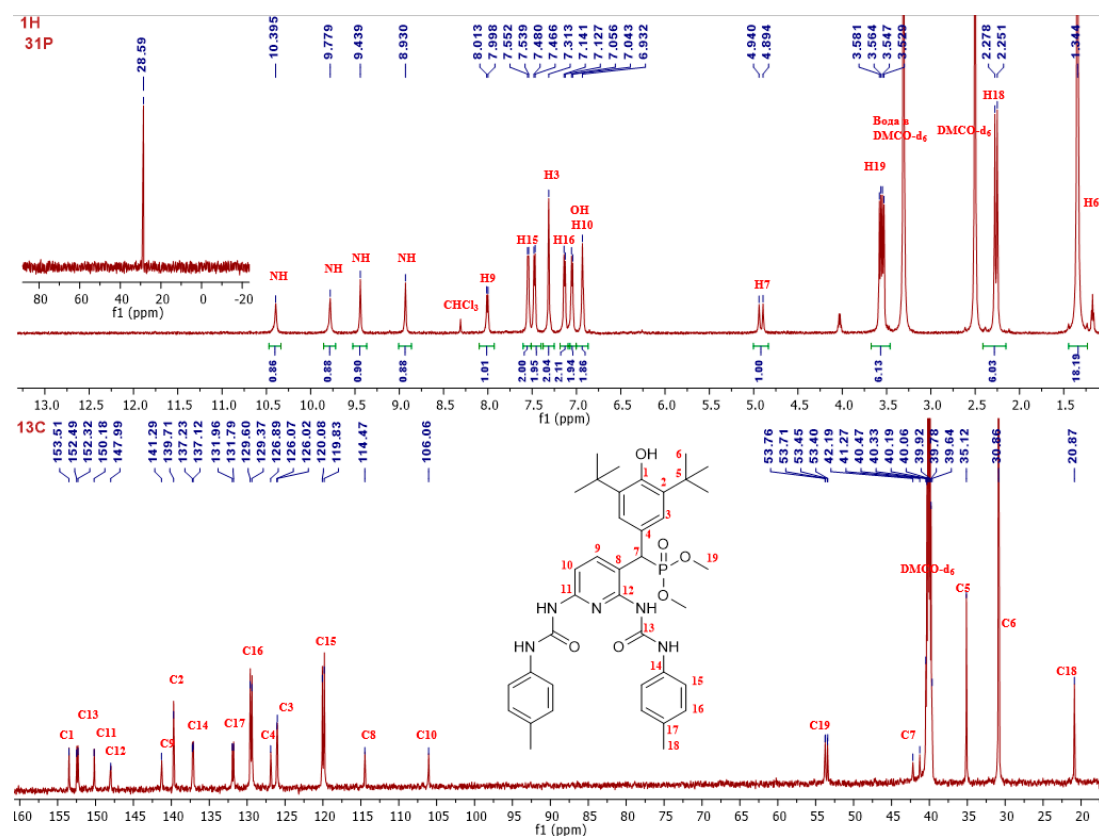

Figure S28. <sup>1</sup>H-<sup>31</sup>P-<sup>13</sup>C- NMR of compound 9a.

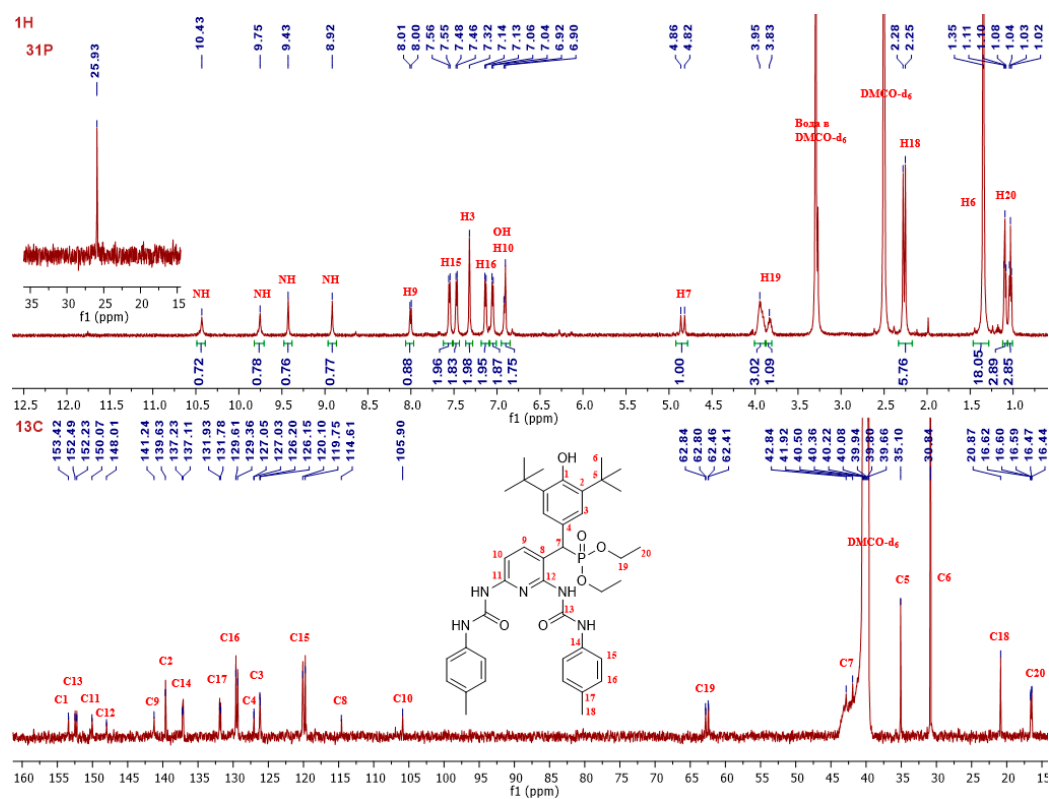

Figure S29. <sup>1</sup>H-<sup>31</sup>P-<sup>13</sup>C- NMR of compound 9b.

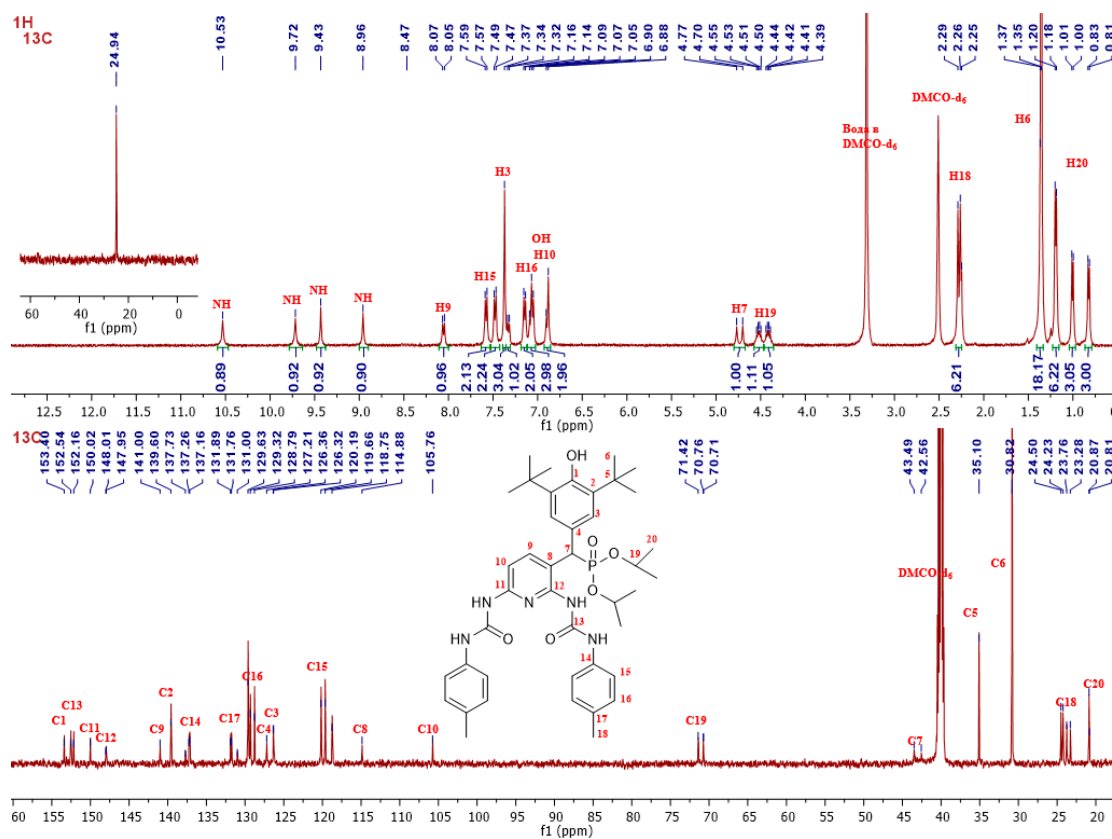

Figure S30.  $^1\text{H}$ - $^{31}\text{P}$ - $^{13}\text{C}$  NMR of compound 9c.

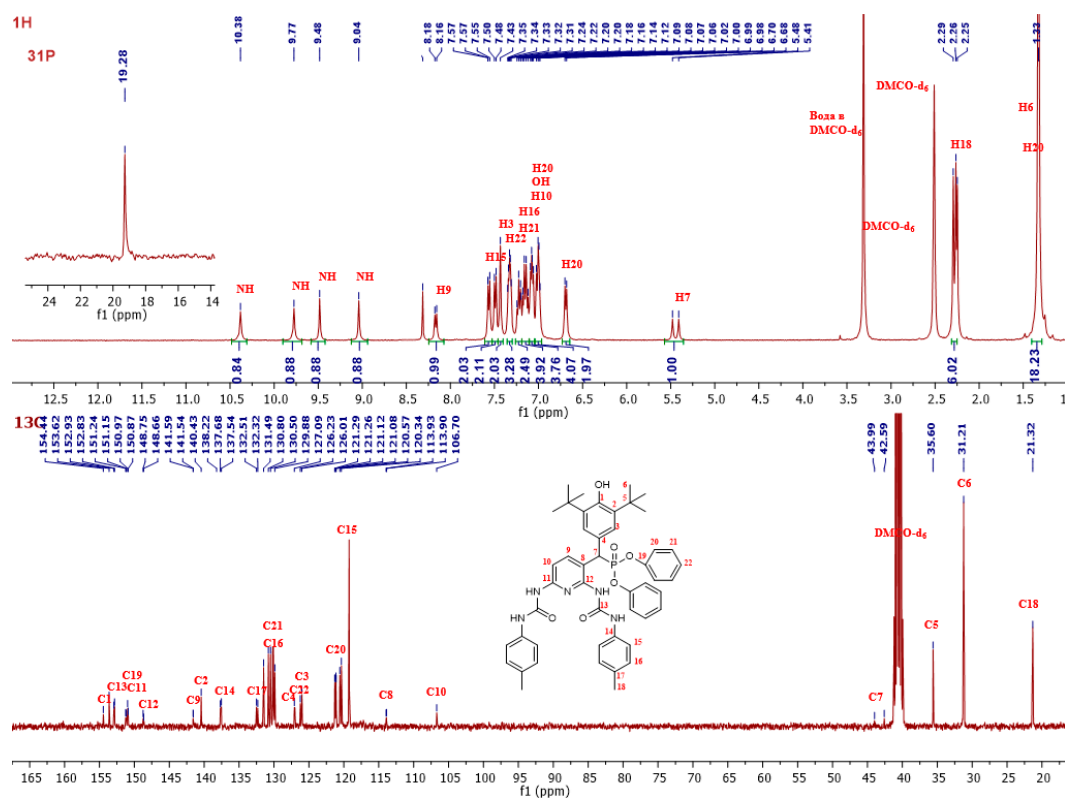

Figure S31.  $^1\text{H}$ - $^{31}\text{P}$ - $^{13}\text{C}$  NMR of compound 9d.



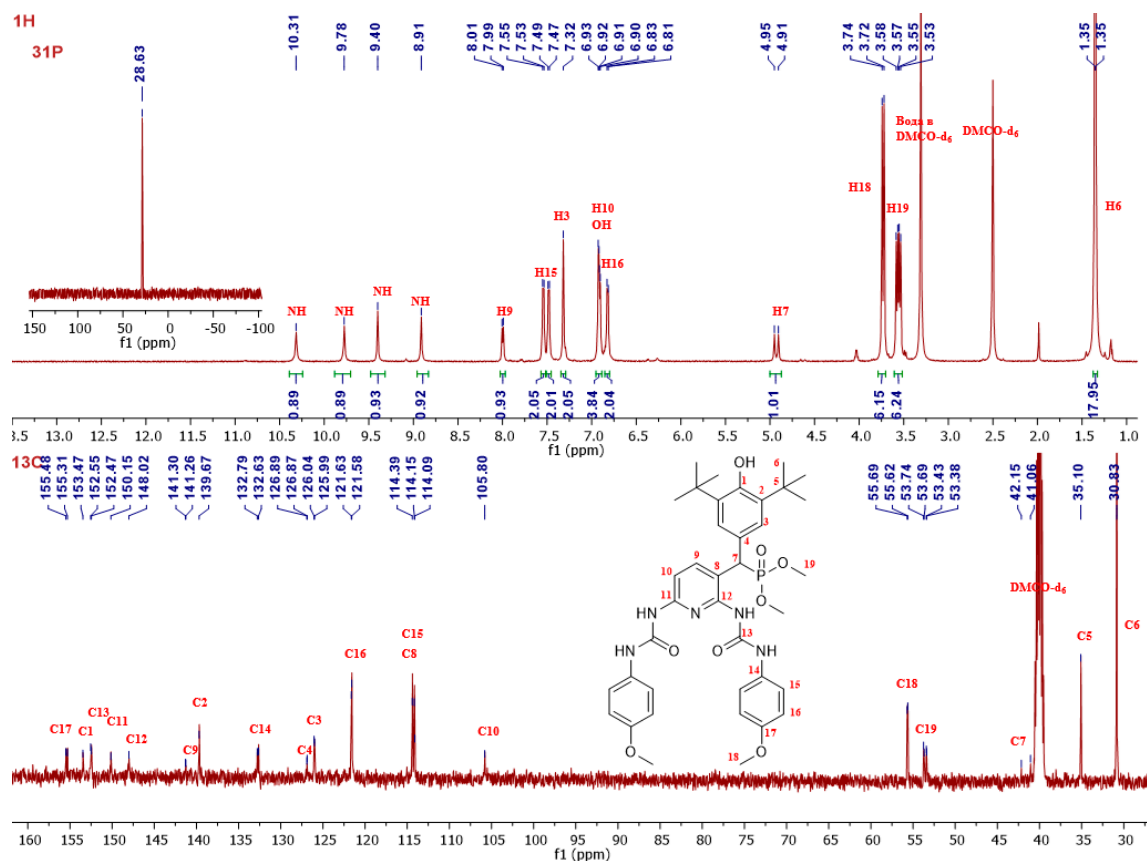

Figure S32.  $^1\text{H}$ -,  $^{31}\text{P}$ -,  $^{13}\text{C}$ - NMR of compound 10a.

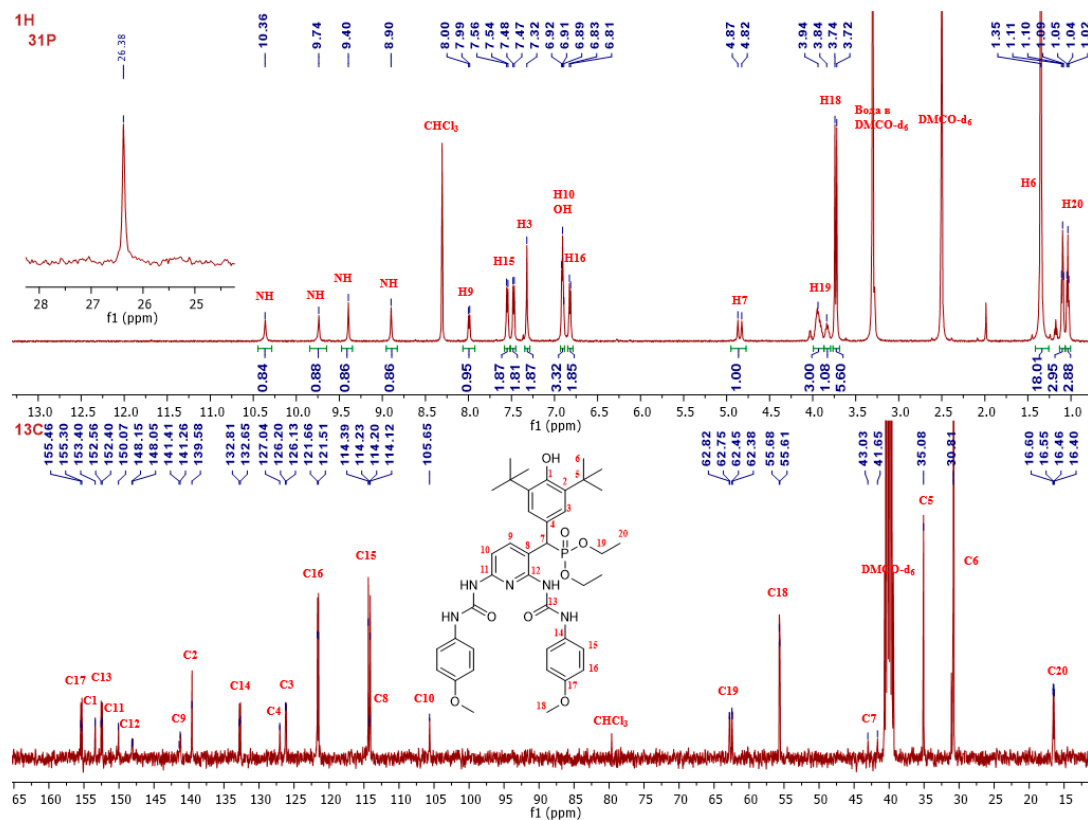

Figure S33.  $^1\text{H}$ -,  $^{31}\text{P}$ -,  $^{13}\text{C}$ - NMR of compound 10b.

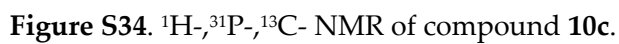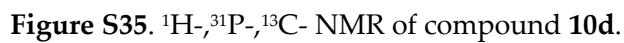

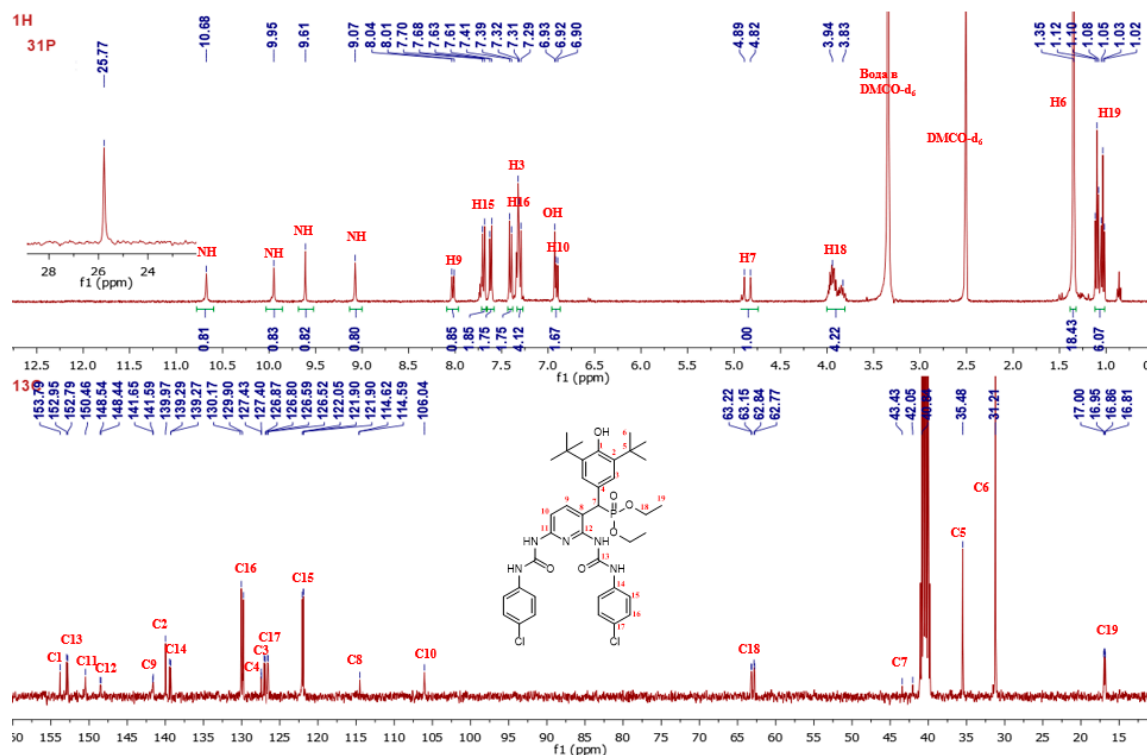

Figure S36. <sup>1</sup>H-, <sup>31</sup>P-, <sup>13</sup>C- NMR of compound 11b.

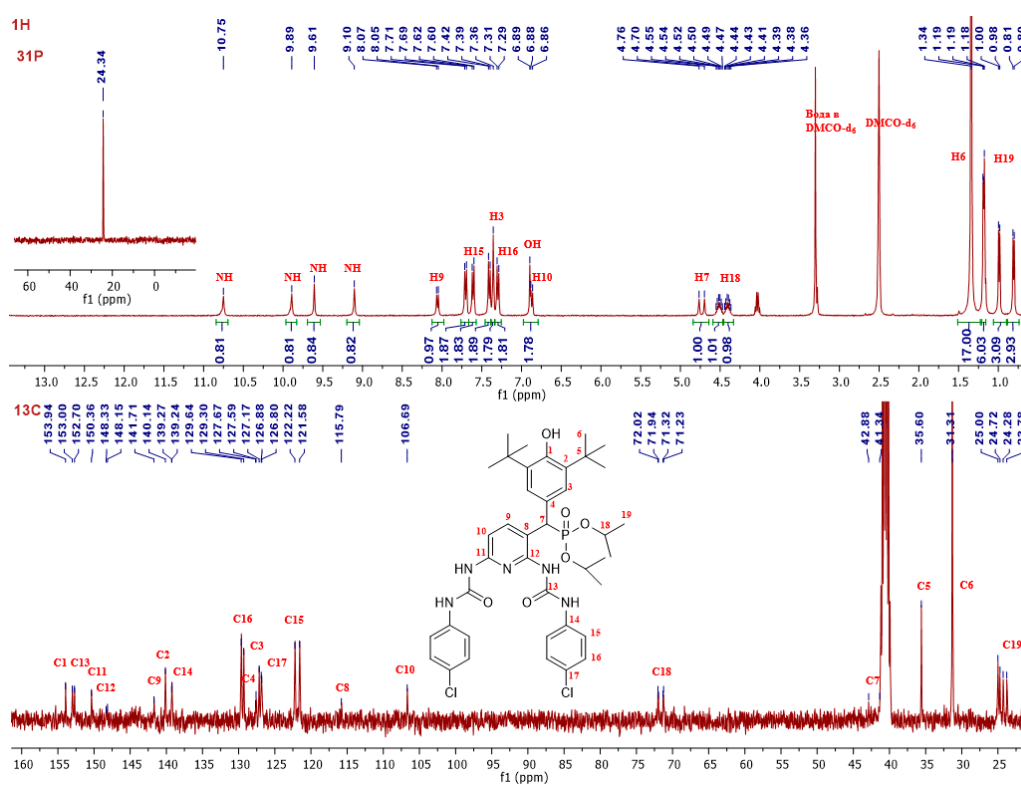

Figure S37. <sup>1</sup>H-, <sup>31</sup>P-, <sup>13</sup>C- NMR of compound 11c.

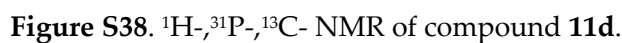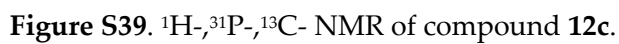

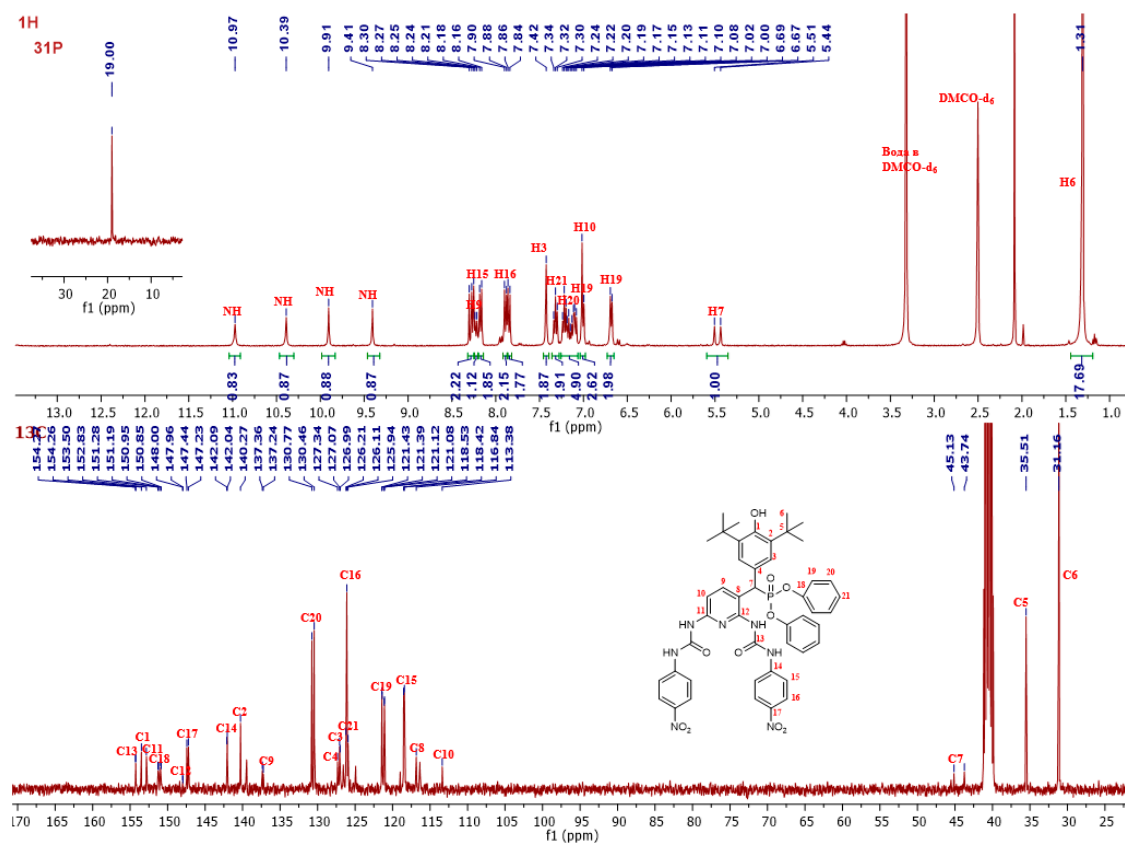

Figure S40. <sup>1</sup>H-, <sup>31</sup>P-, <sup>13</sup>C- NMR of compound 12d.

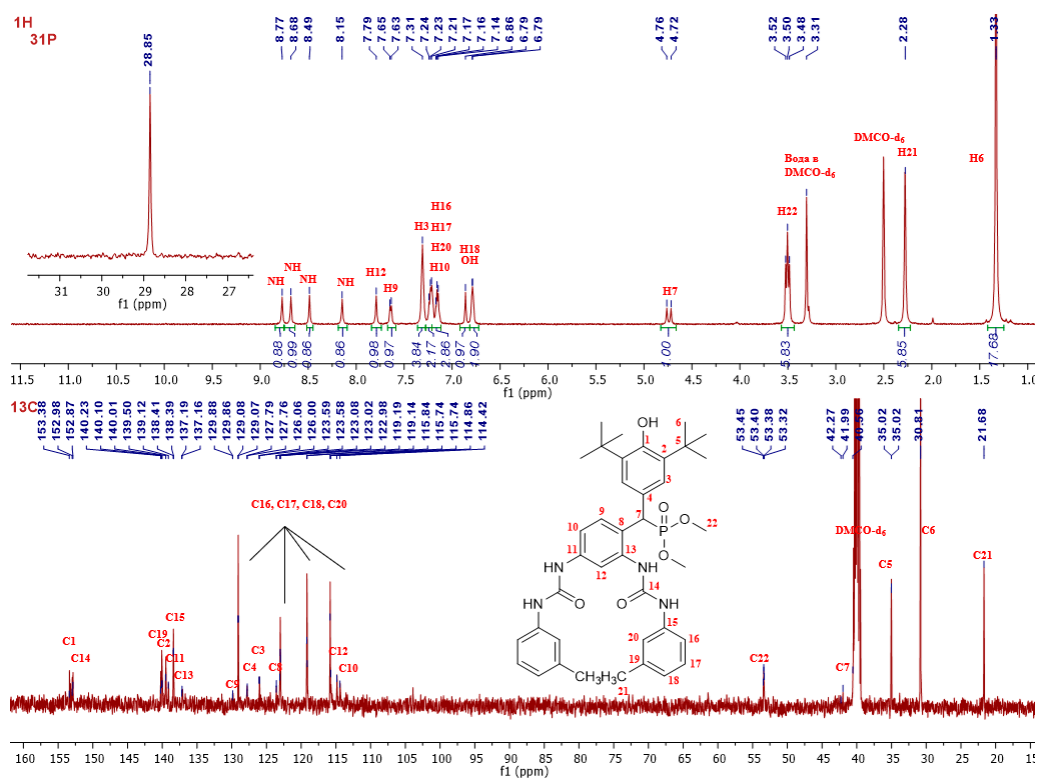

Figure S41. <sup>1</sup>H-, <sup>31</sup>P-, <sup>13</sup>C- NMR of compound 13a.



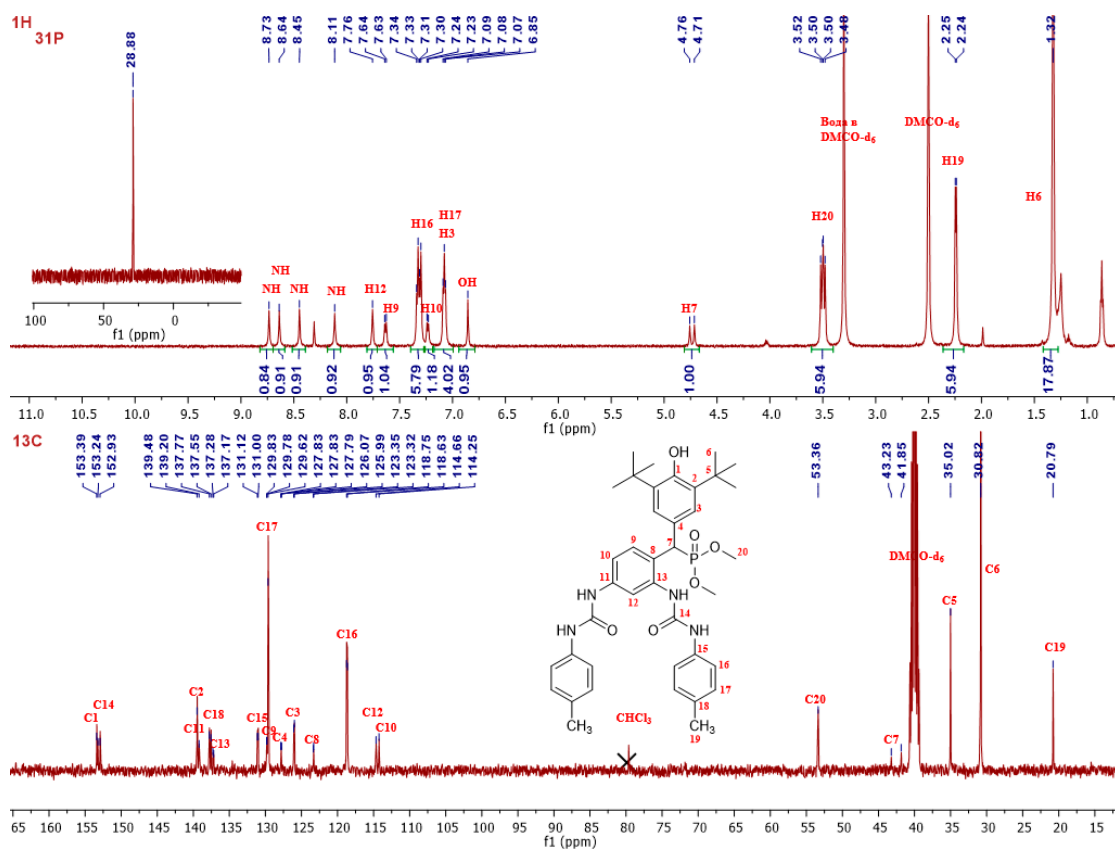

Figure S44. <sup>1</sup>H-, <sup>31</sup>P-, <sup>13</sup>C- NMR of compound 14a.

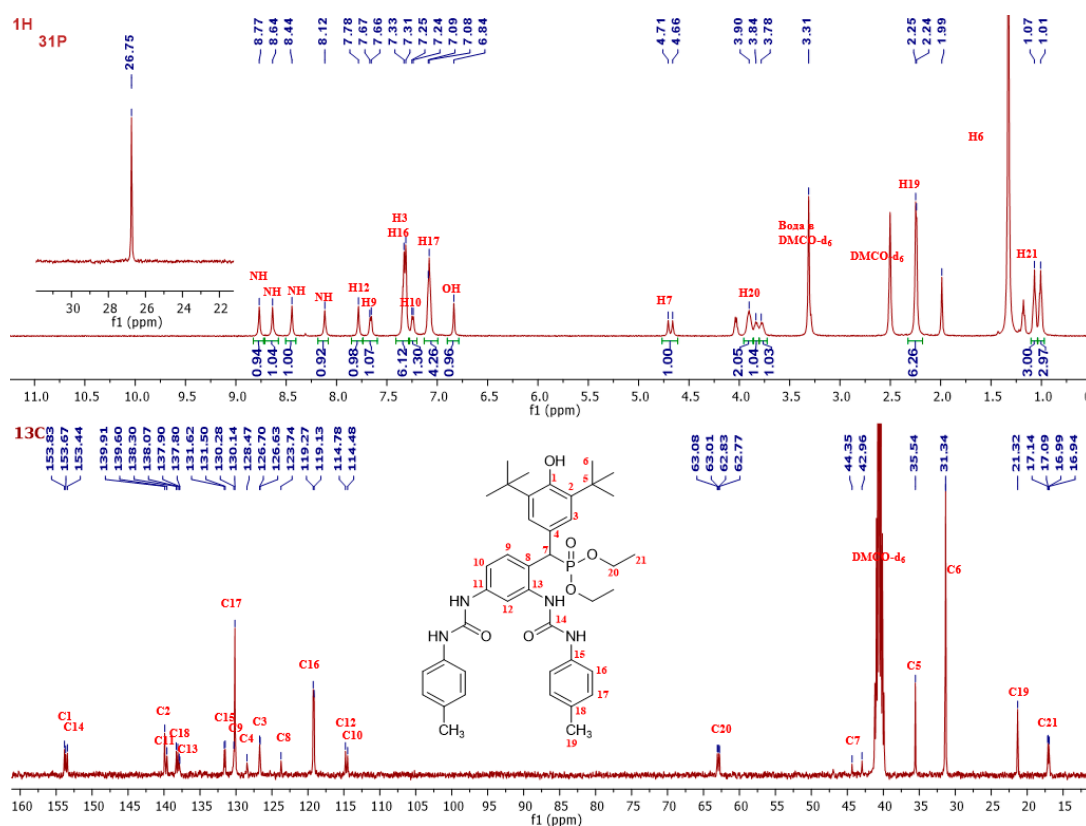

Figure S45. <sup>1</sup>H-, <sup>31</sup>P-, <sup>13</sup>C- NMR of compound 14b.



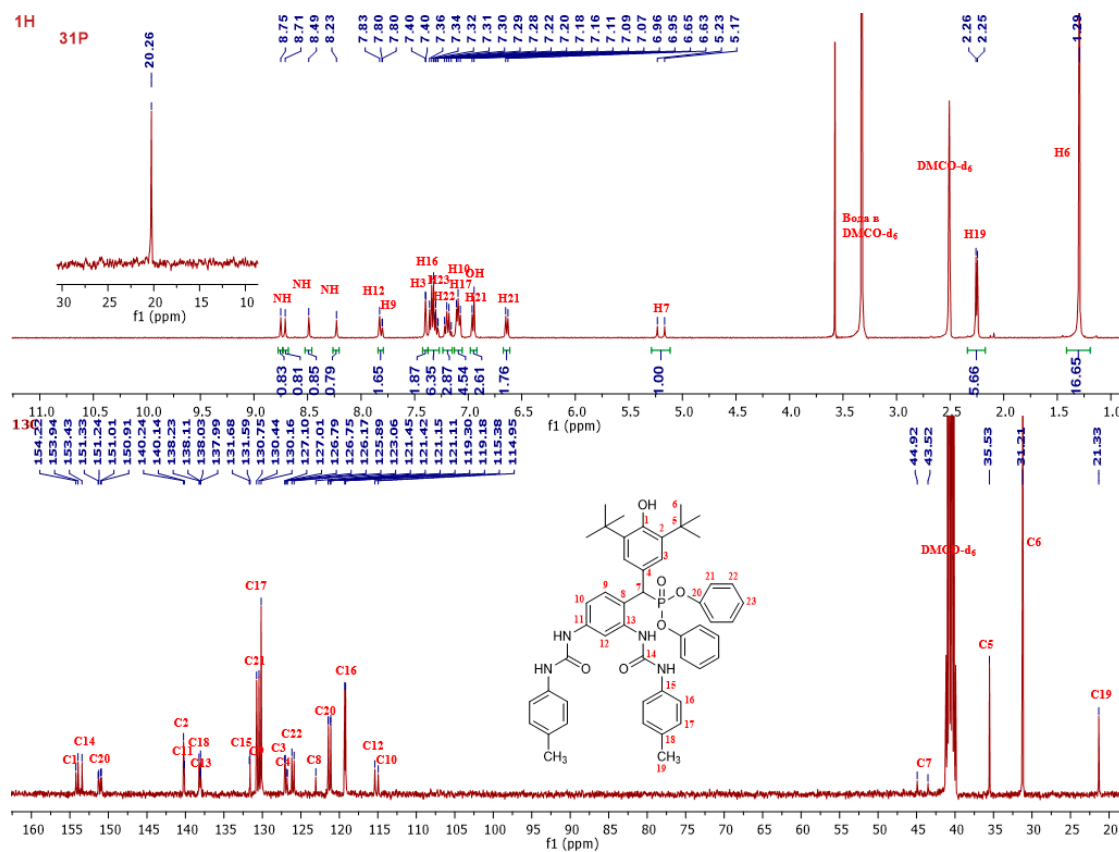

Figure S46.  $^1\text{H}$ -,  $^{31}\text{P}$ -,  $^{13}\text{C}$ - NMR of compound 14d.

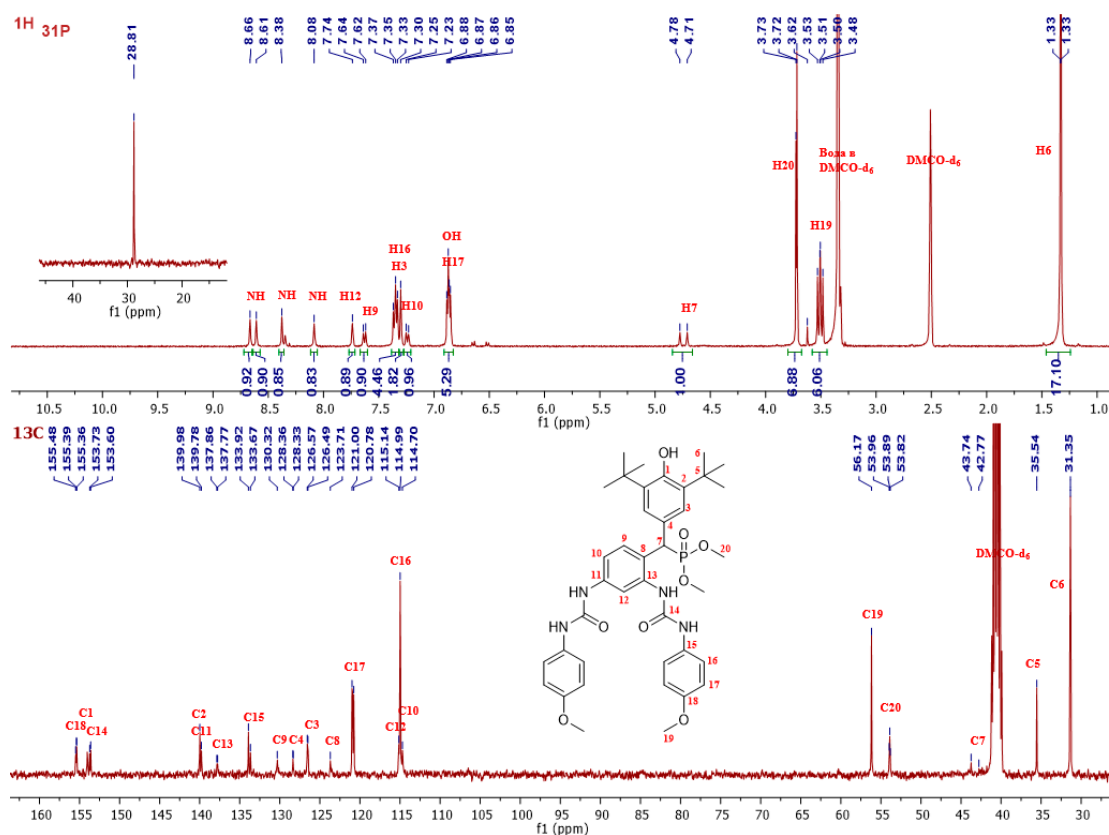

Figure S47.  $^1\text{H}$ -,  $^{31}\text{P}$ -,  $^{13}\text{C}$ - NMR of compound 15a.



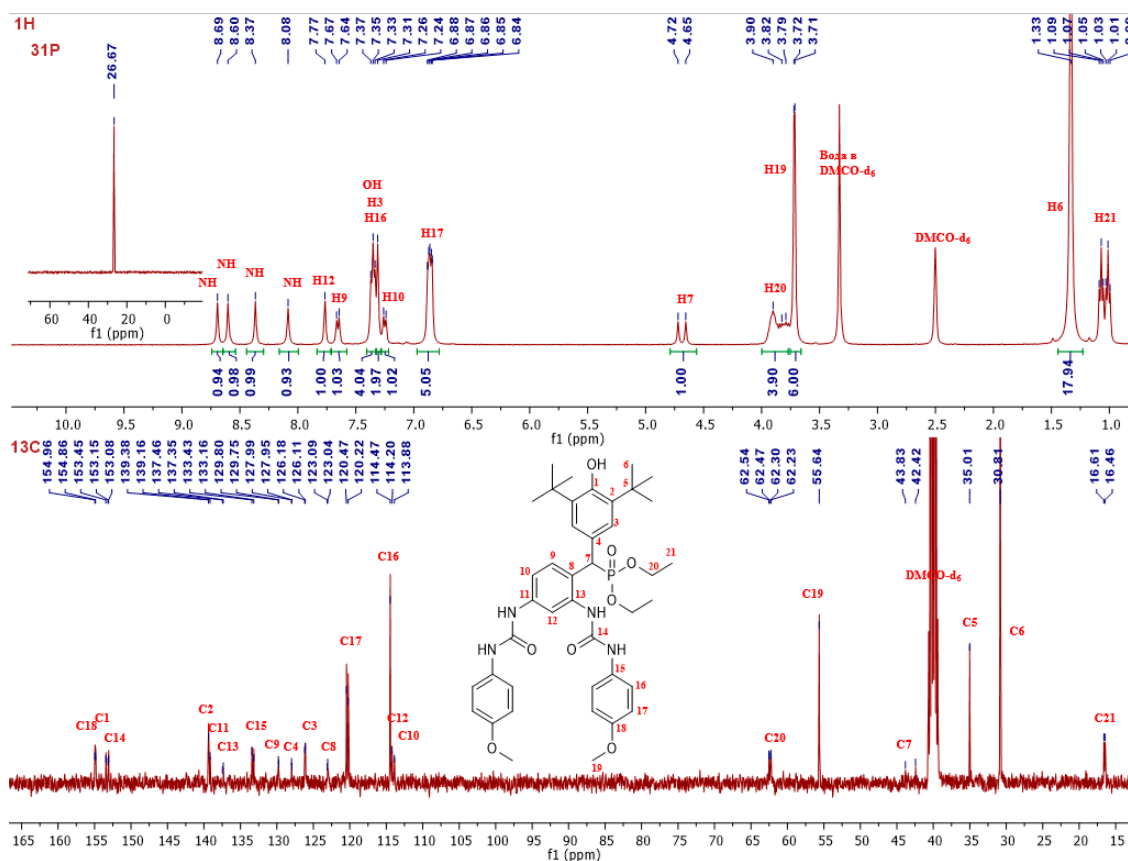

Figure S48. <sup>1</sup>H-, <sup>31</sup>P-, <sup>13</sup>C- NMR of compound 15b.

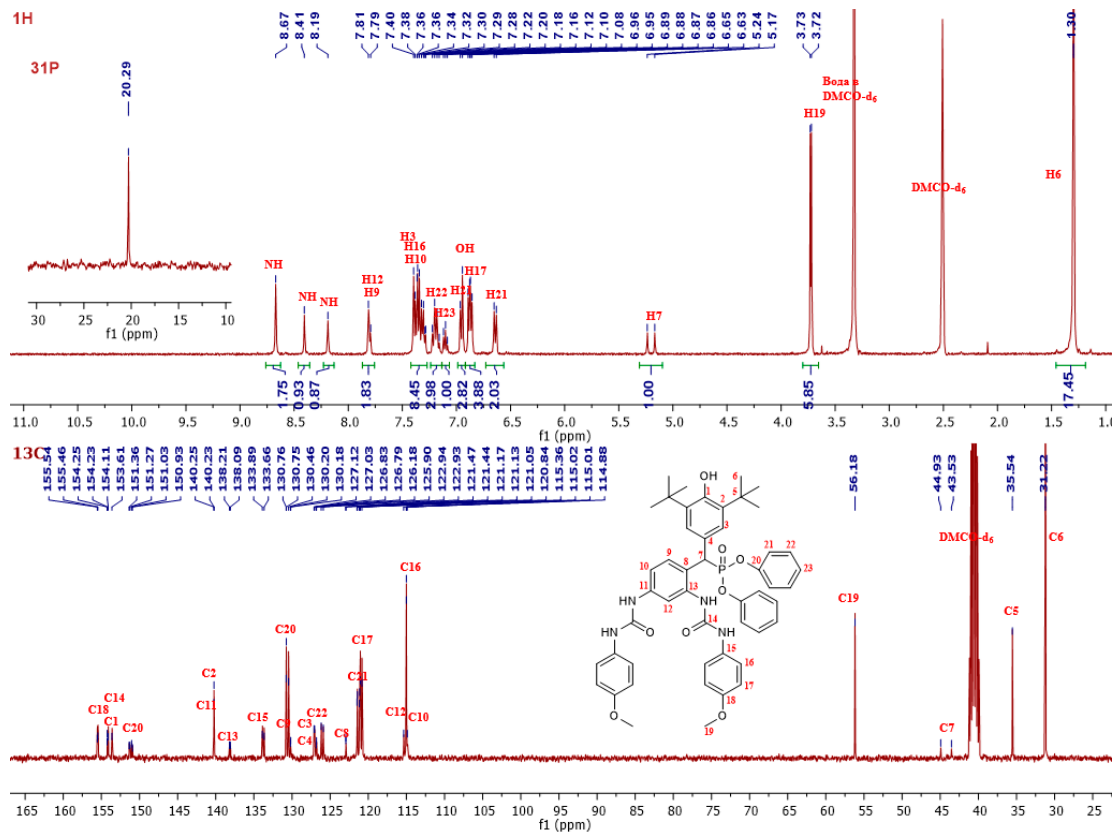

Figure S49. <sup>1</sup>H-, <sup>31</sup>P-, <sup>13</sup>C- NMR of compound 15d.

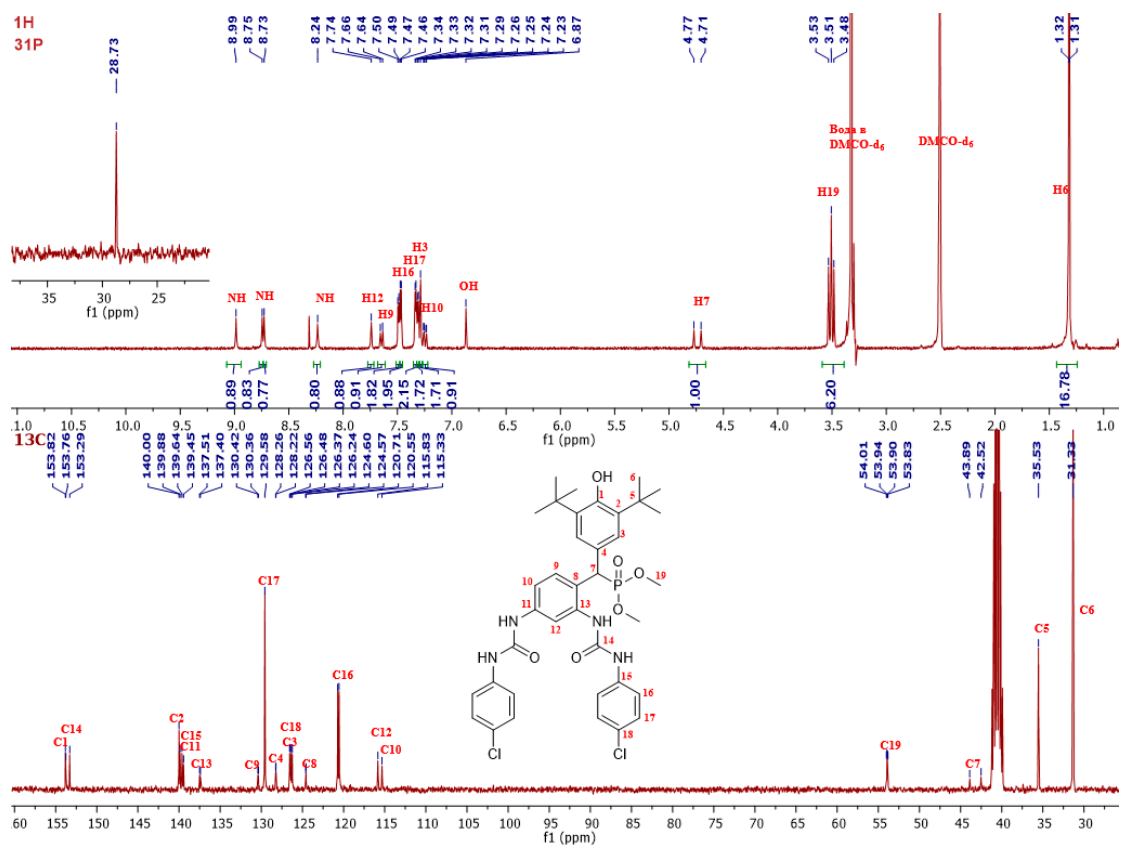

Figure S50. <sup>1</sup>H-, <sup>31</sup>P-, <sup>13</sup>C- NMR of compound 16a

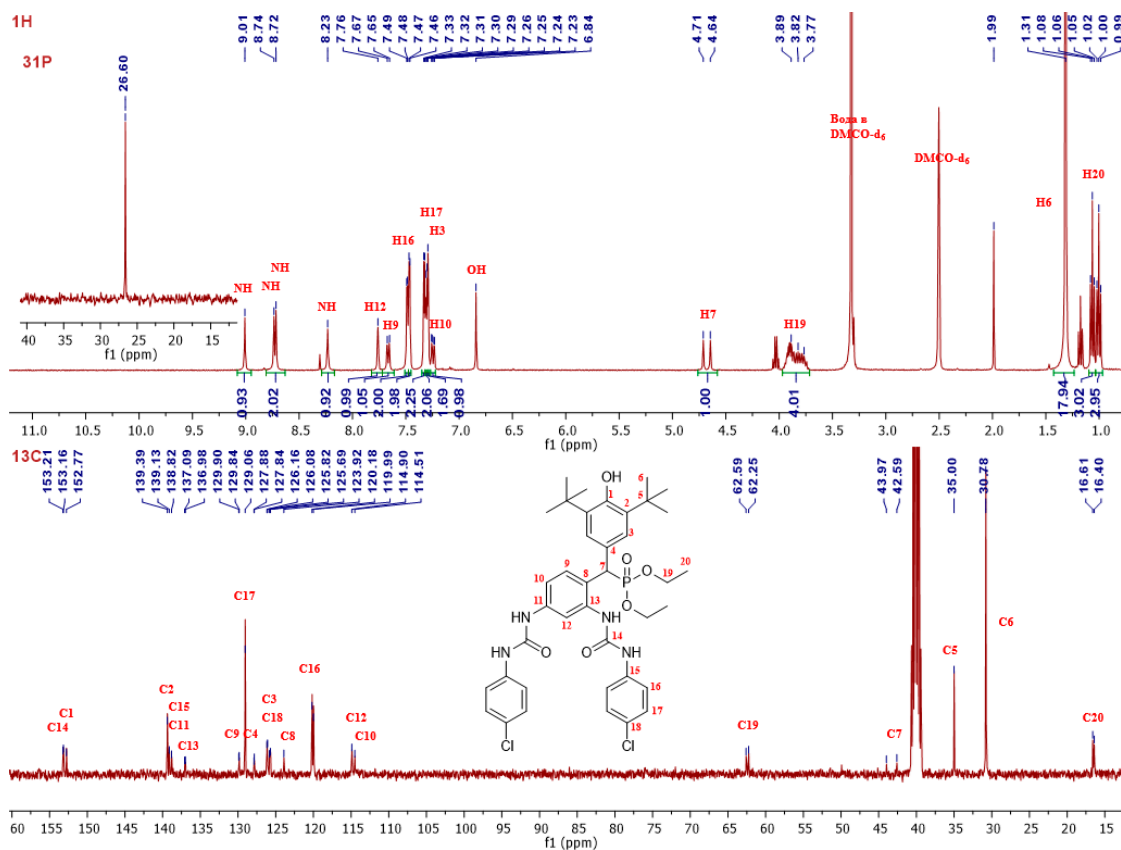

Figure S51. <sup>1</sup>H-, <sup>31</sup>P-, <sup>13</sup>C- NMR of compound 16b

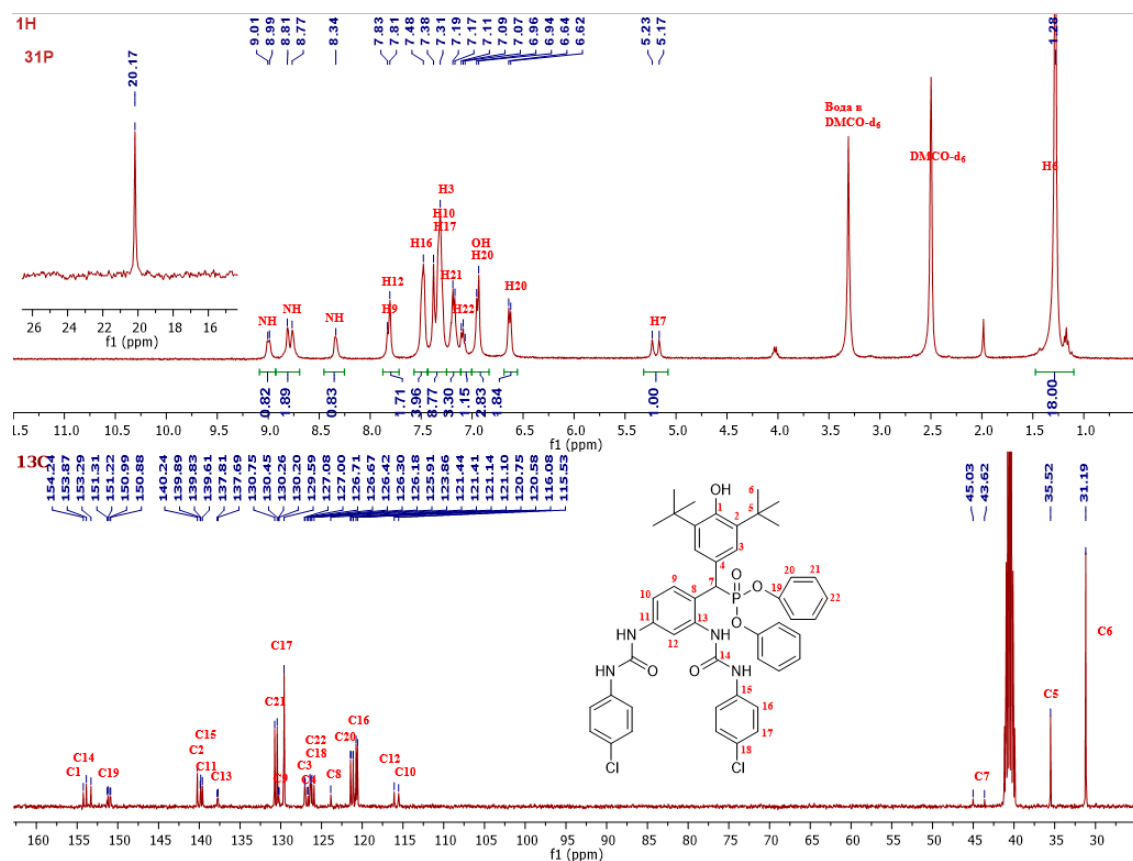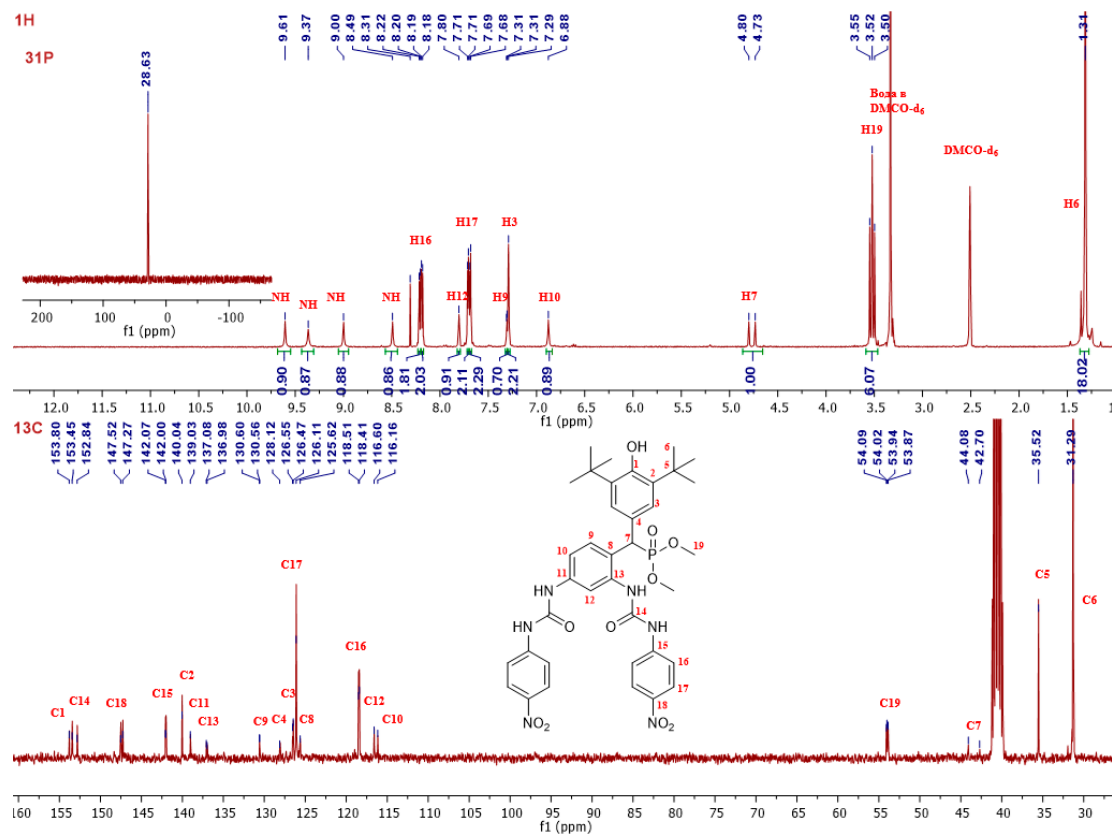

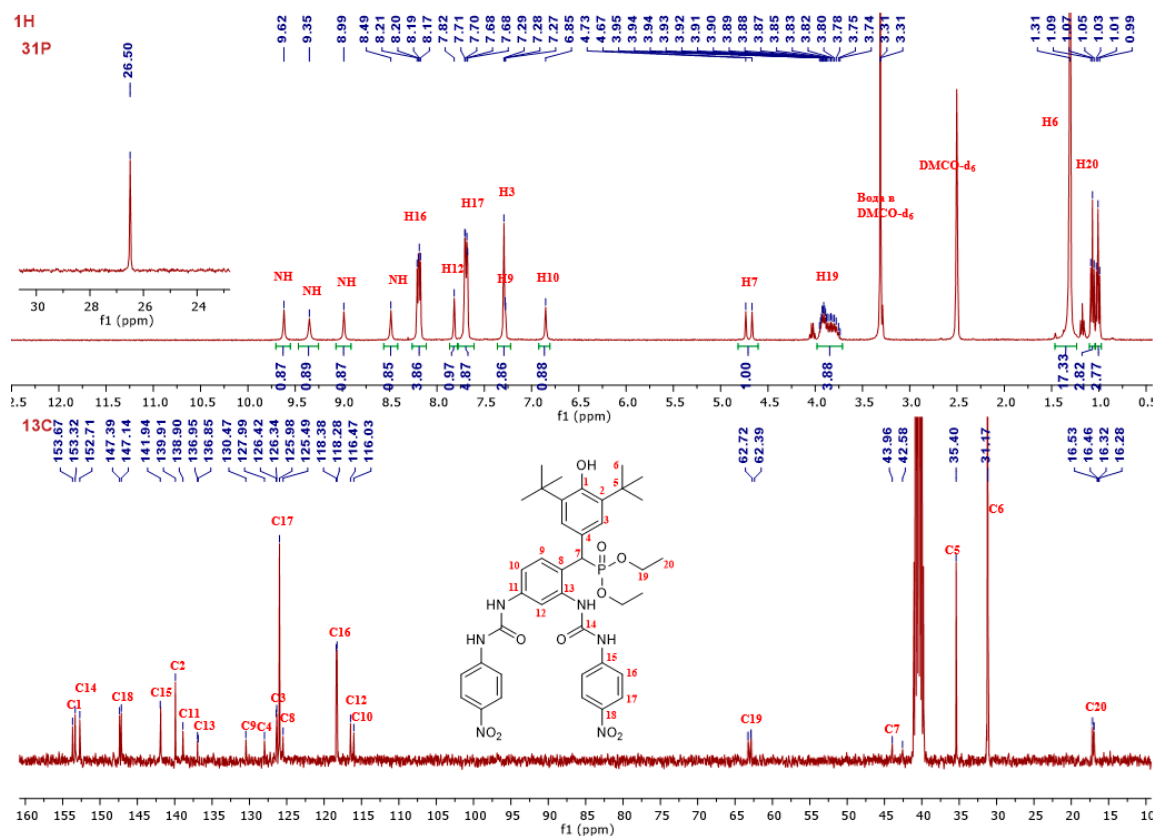

Figure S54. <sup>1</sup>H-, <sup>31</sup>P- NMR of compound 17b.

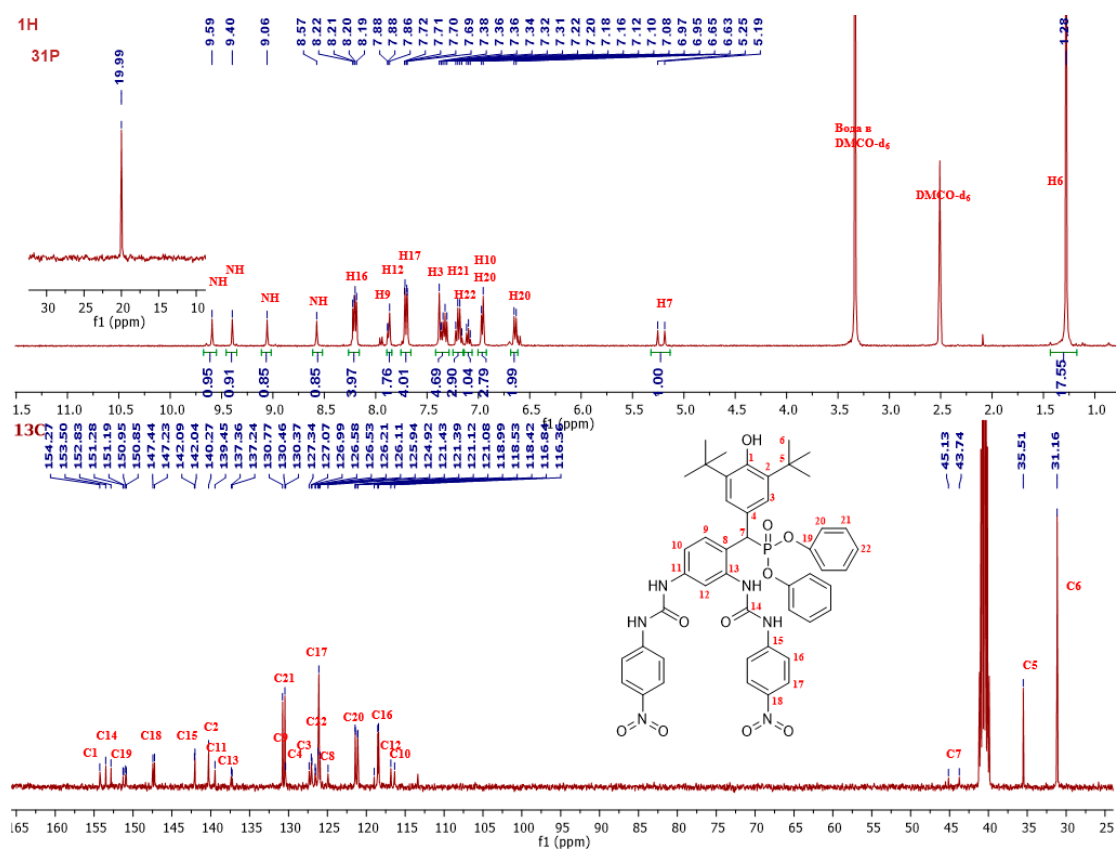

Figure S55. <sup>1</sup>H-, <sup>31</sup>P-, <sup>13</sup>C- NMR of compound 17d.

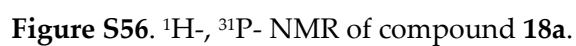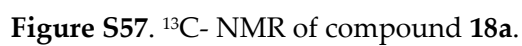

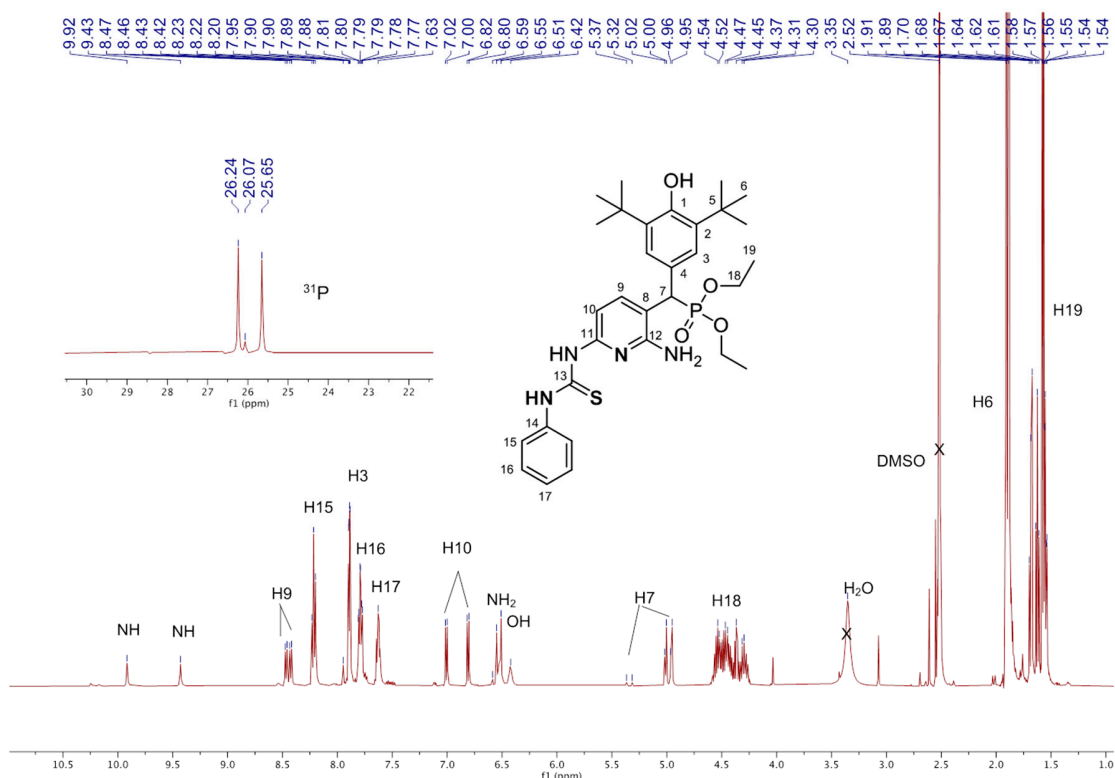

Figure S58.  $^1\text{H}$ - $^{31}\text{P}$ - NMR of compound **18b**.

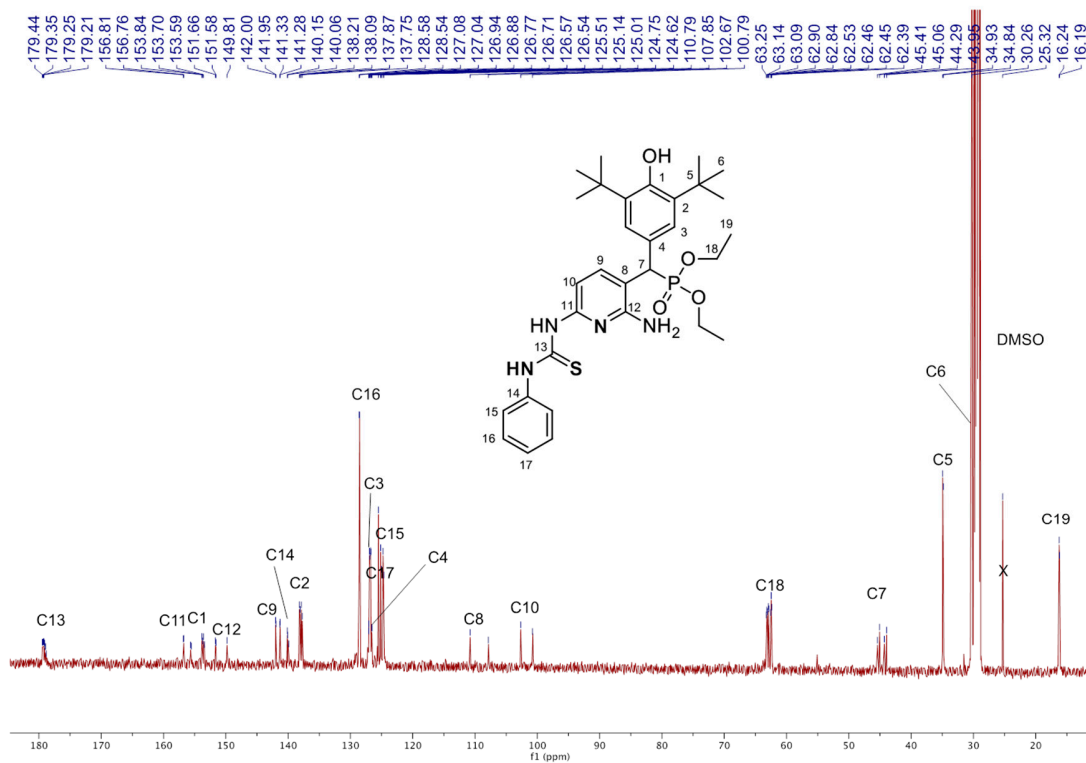

Figure S59.  $^{13}\text{C}$ - NMR of compound **18b**.

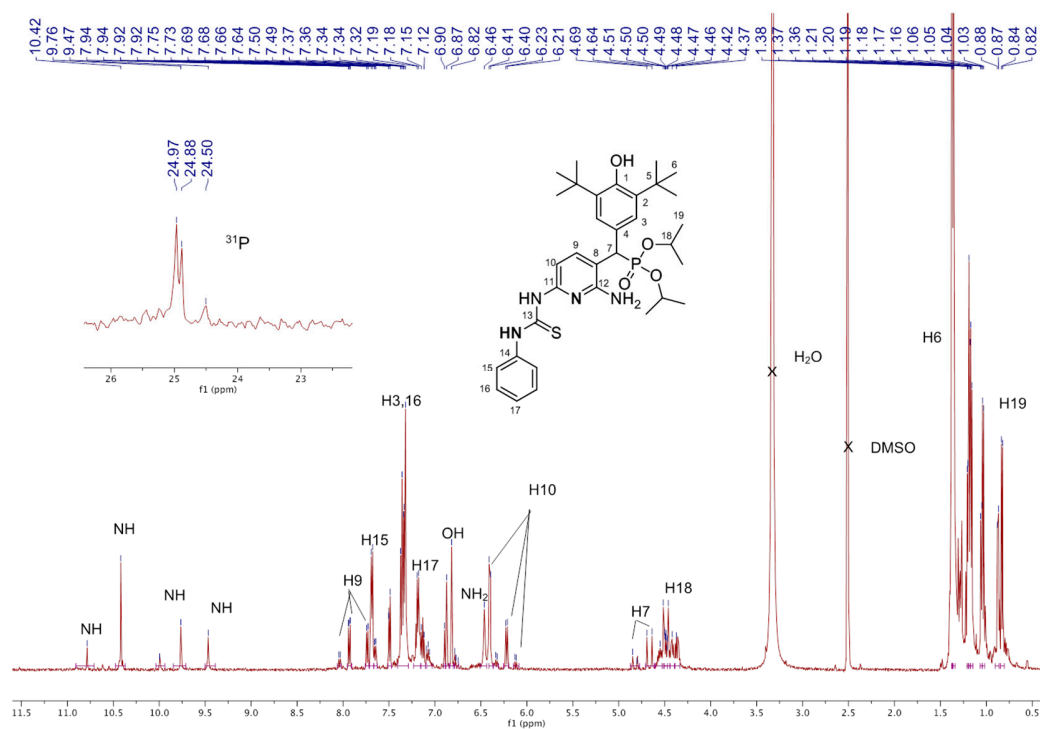

**Figure S60.** <sup>1</sup>H-,<sup>31</sup>P- NMR of compound 18c.

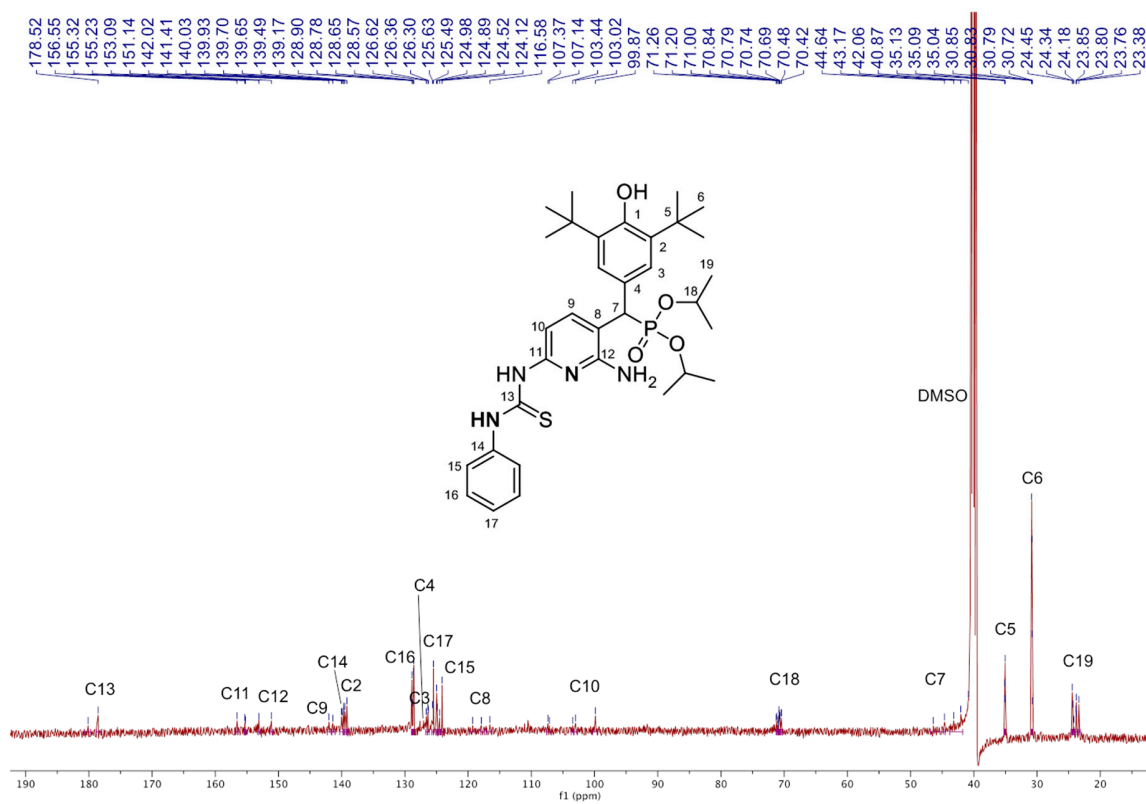

**Figure S61.** <sup>13</sup>C- NMR of compound 18c.



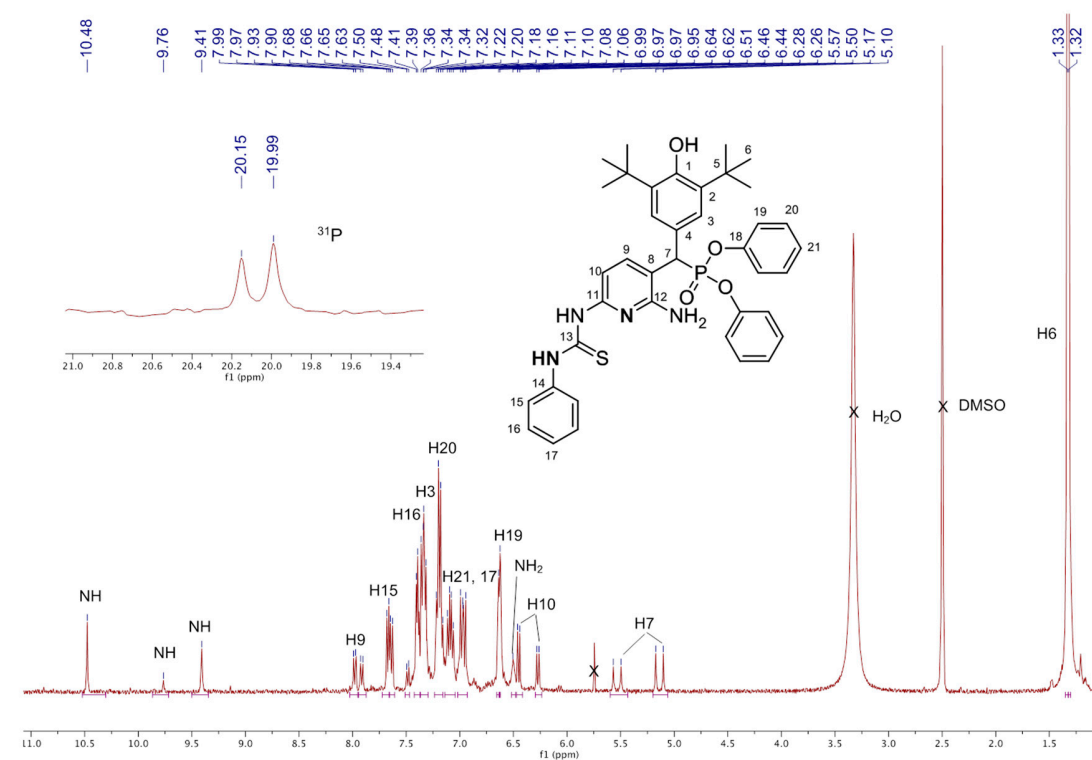

**Figure S6d.** <sup>1</sup>H-, <sup>31</sup>P- NMR of compound **18d**.

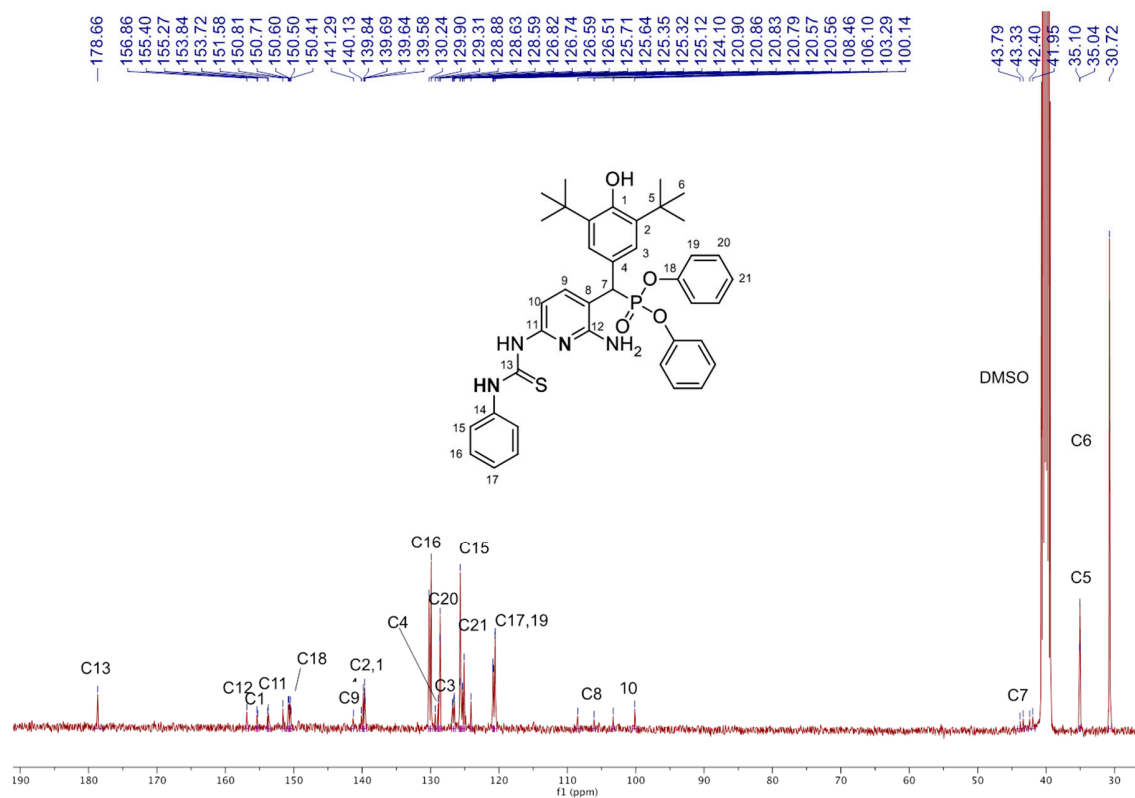



Figure S63.  $^{13}\text{C}$ - NMR of compound 18d.

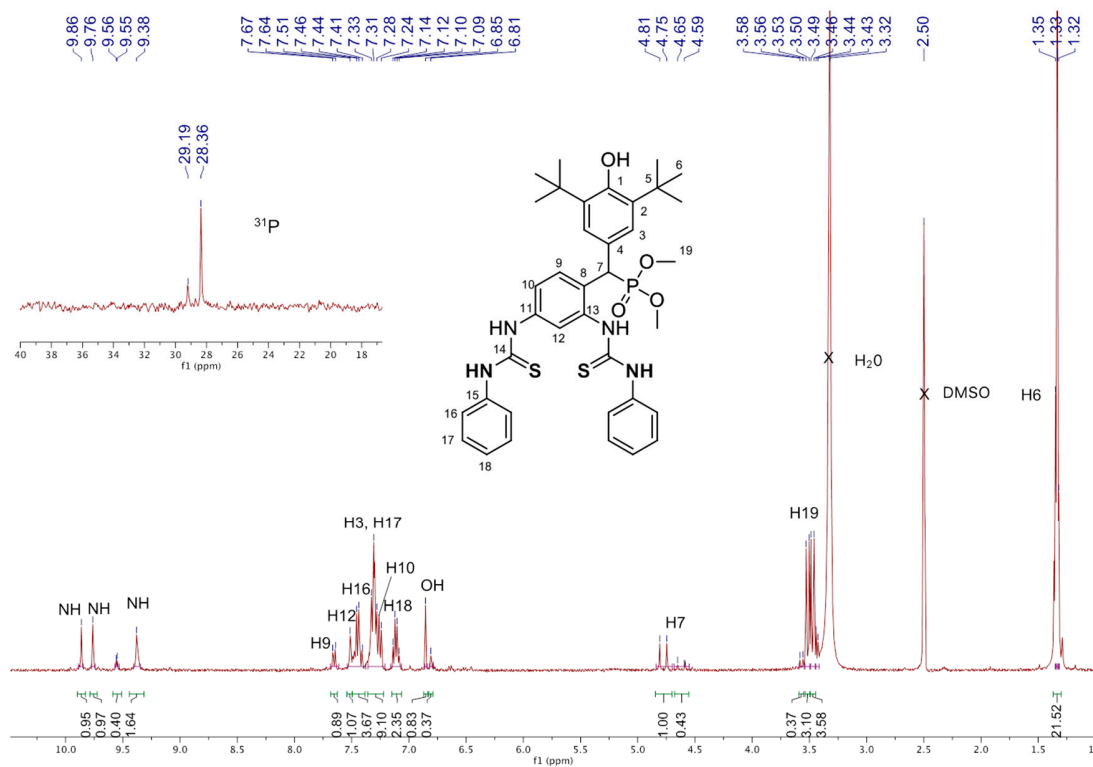

Figure S64.  $^1\text{H}$ -,  $^{31}\text{P}$ -NMR of compound 19a.

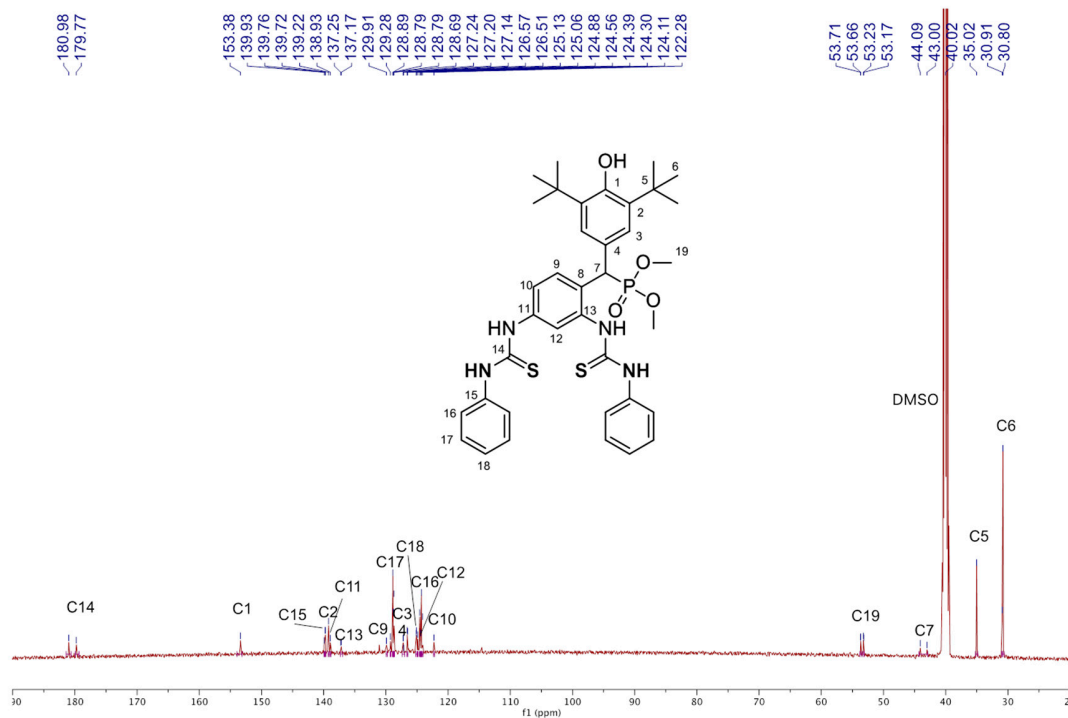

Figure S65.  $^{13}\text{C}$ - NMR of compound **19a**.

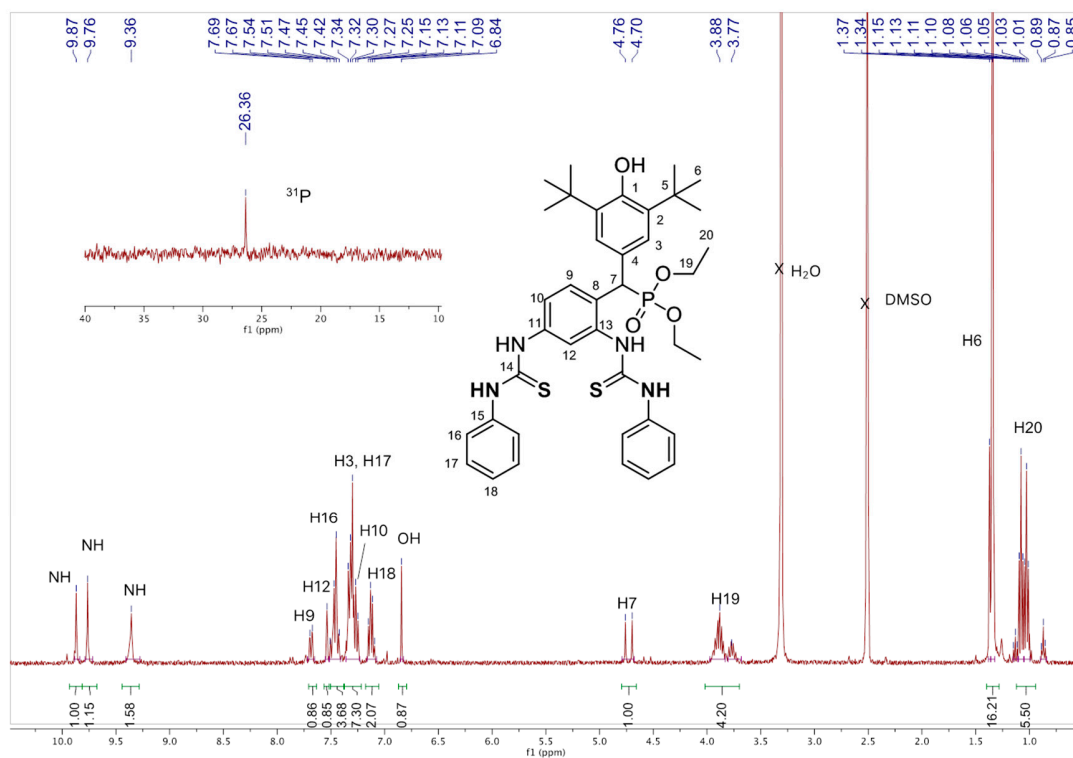

Figure S66.  $^1\text{H}$ - $^{31}\text{P}$ - NMR of compound **19b**.

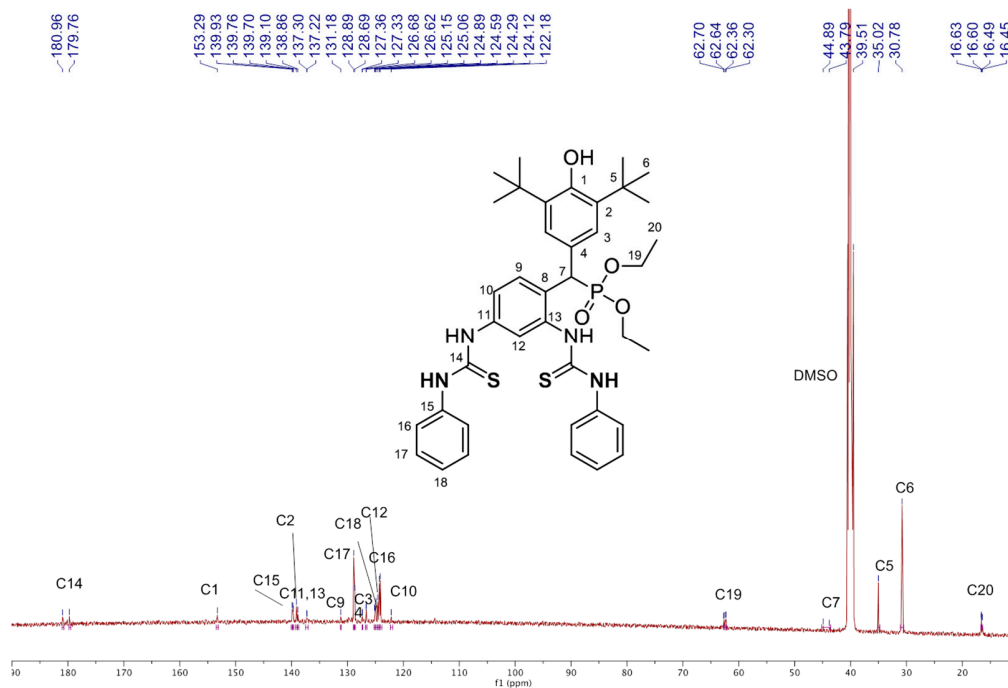

Figure S67.  $^{13}\text{C}$ - NMR of compound **19b**.

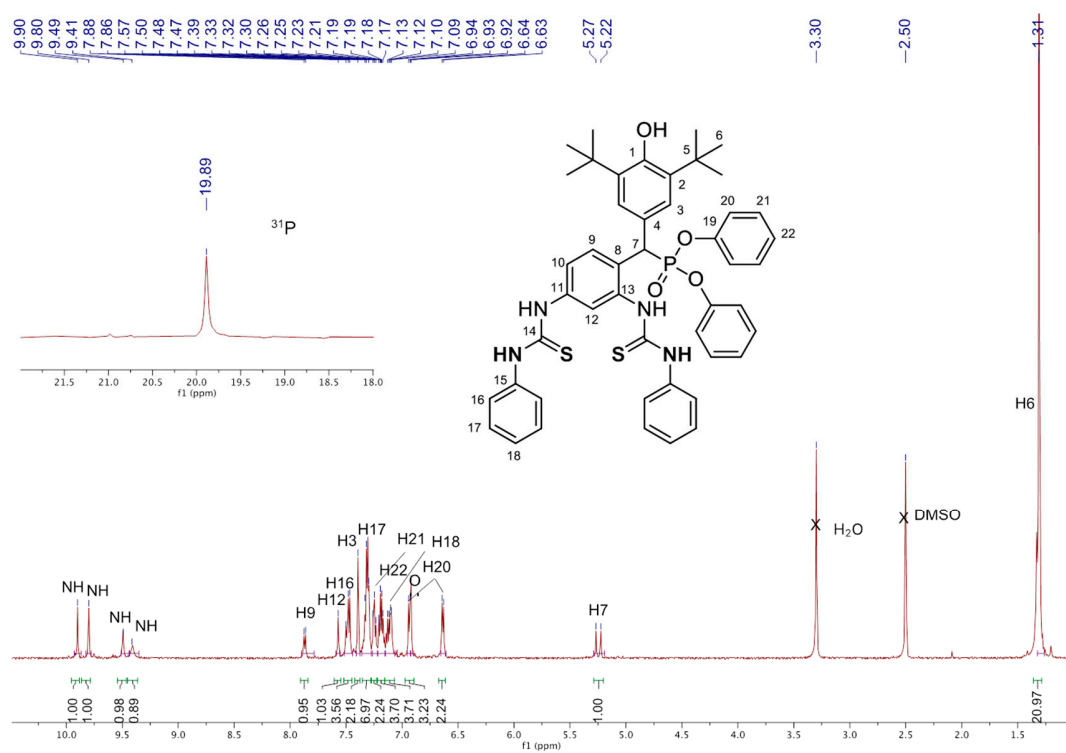

Figure S68.  $^1\text{H}$ - $^{31}\text{P}$ - NMR of compound **19d**.

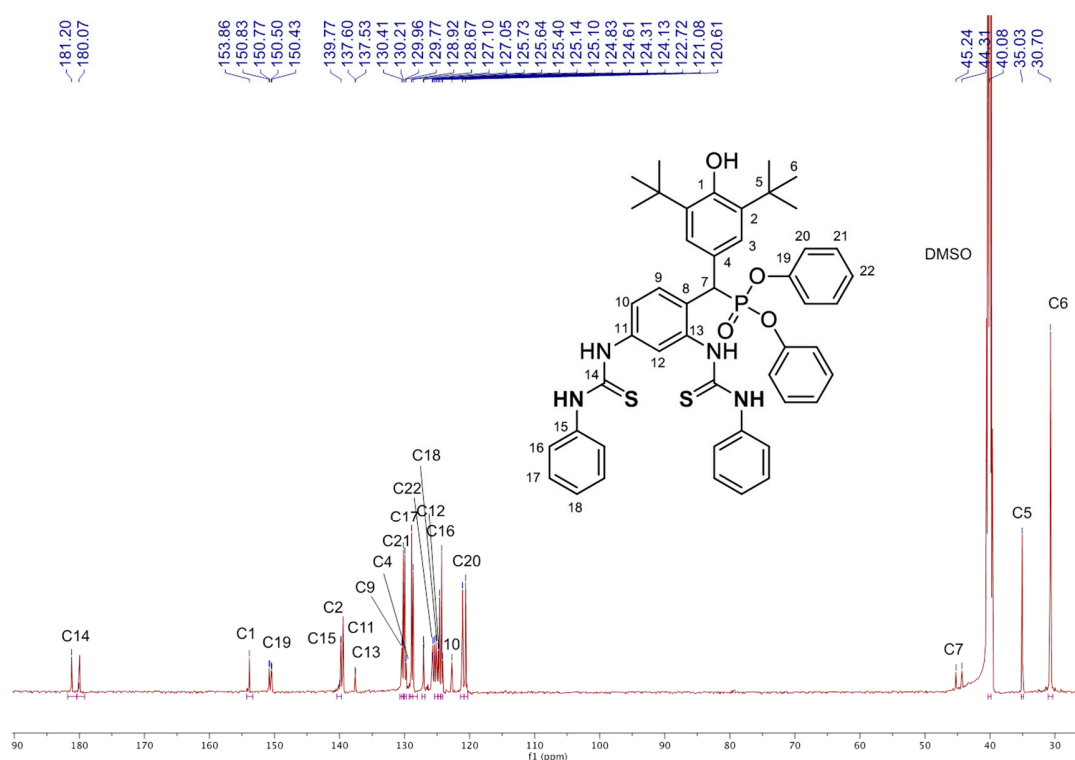

Figure S69.  $^{13}\text{C}$ - NMR of compound **19d**.

## 2D correlation NMR experiments

$^1\text{H}$ - $^1\text{H}$  COSY,  $^1\text{H}$ - $^{13}\text{C}$  HSQC,  $^1\text{H}$ - $^{13}\text{C}$  HMBC) of compounds 5a-d; 6a,b,d; 18a-d and 19a,b,d.

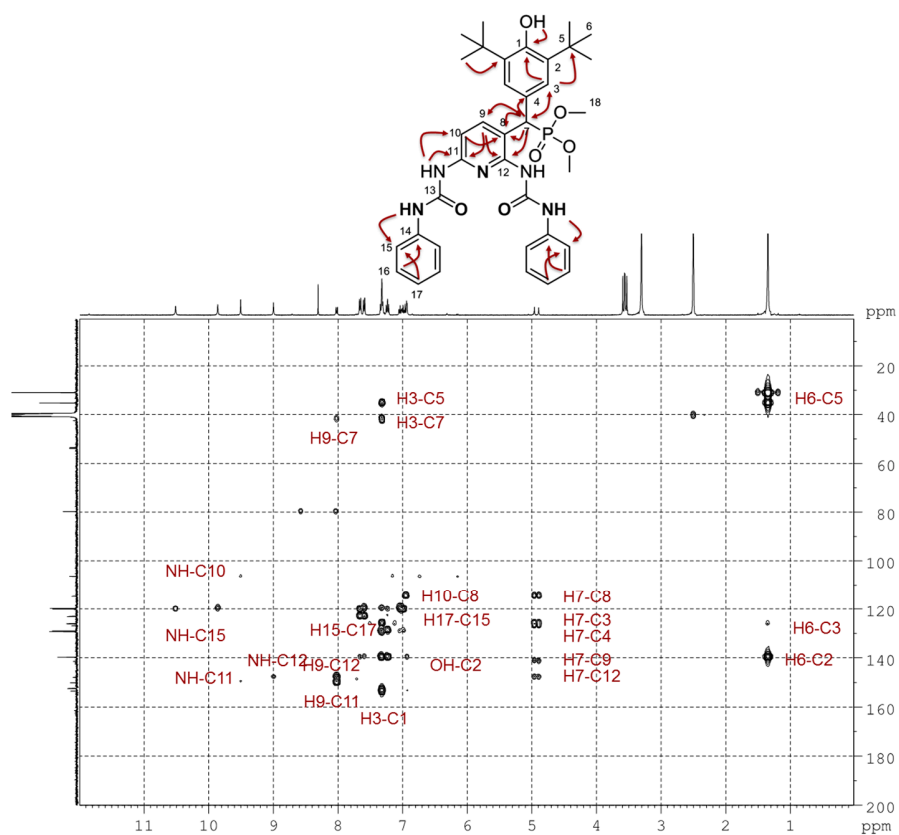

**Figure S70.**  $^1\text{H}$ - $^{13}\text{C}$  HMBC correlations of compound 5a.

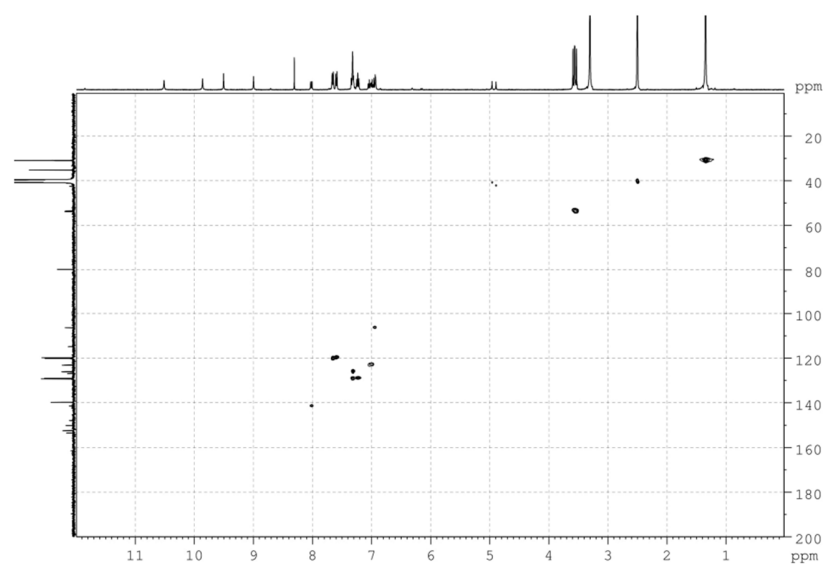

**Figure S71.**  $^1\text{H}$ - $^{13}\text{C}$  HSQC correlations of compound **5a**.

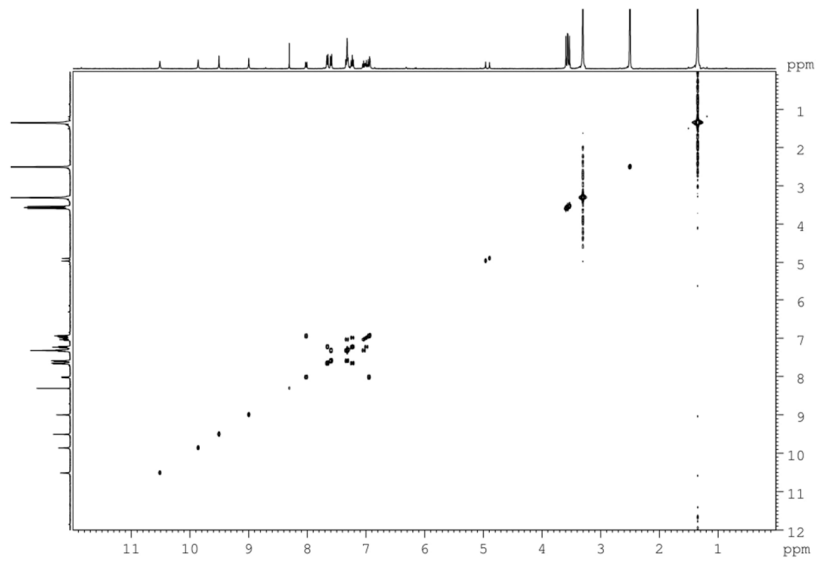

**Figure S72.**  $^1\text{H}$ - $^1\text{H}$  COSY correlations of compound **5a**.

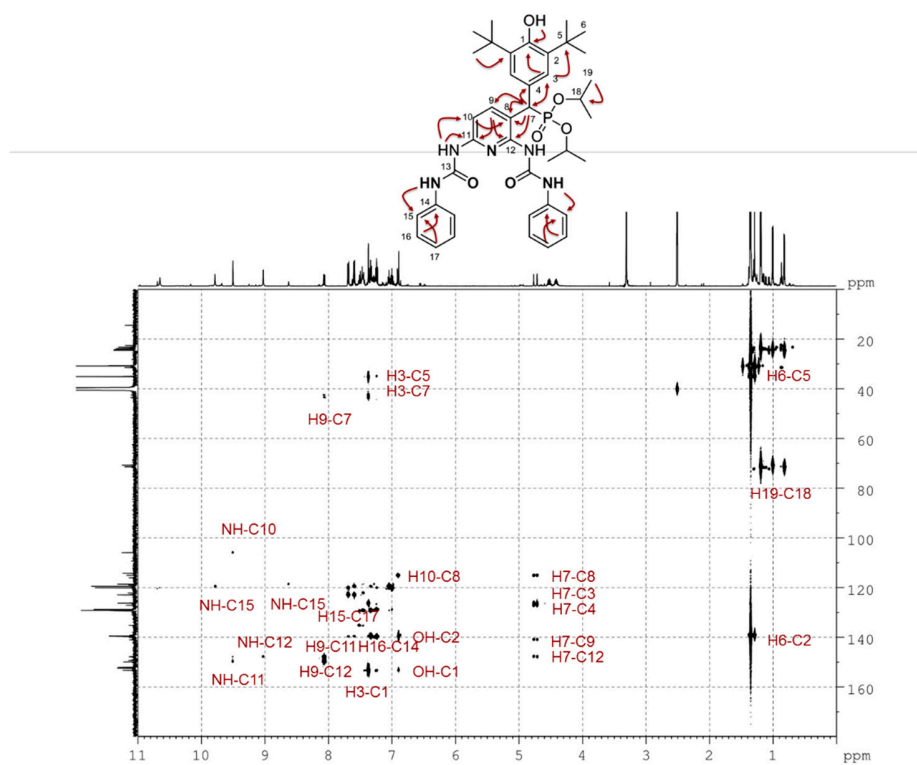

Figure S73.  $^1\text{H}$ - $^{13}\text{C}$  HMBC correlations of compound 5c.

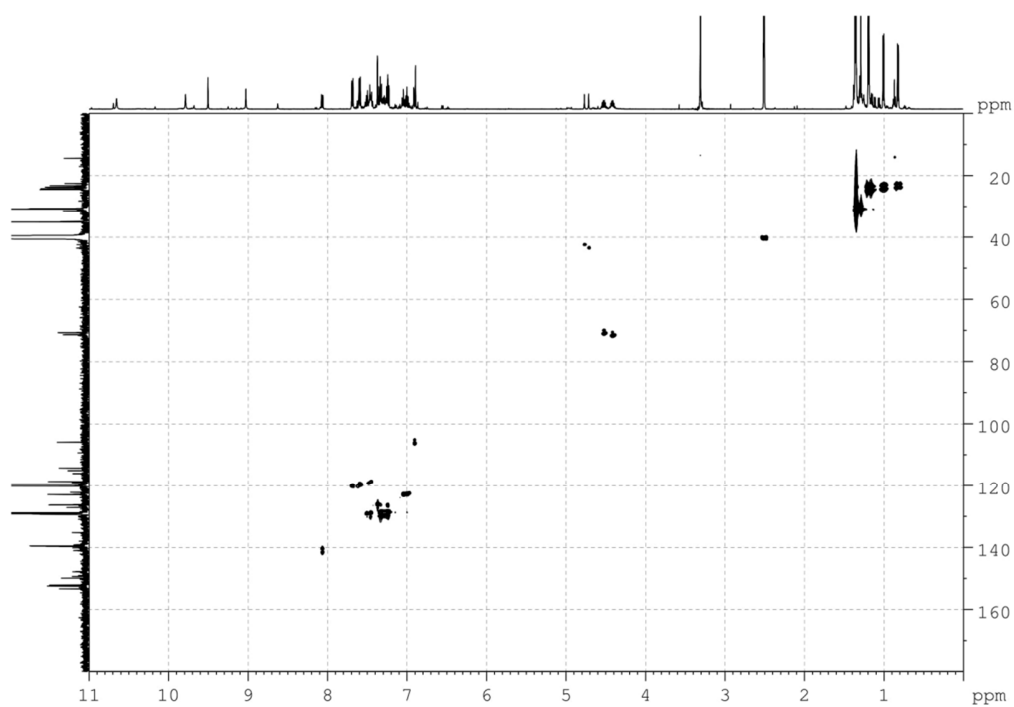

**Figure S74.**  $^1\text{H}$ - $^{13}\text{C}$  HSQC correlations of compound **5c**.

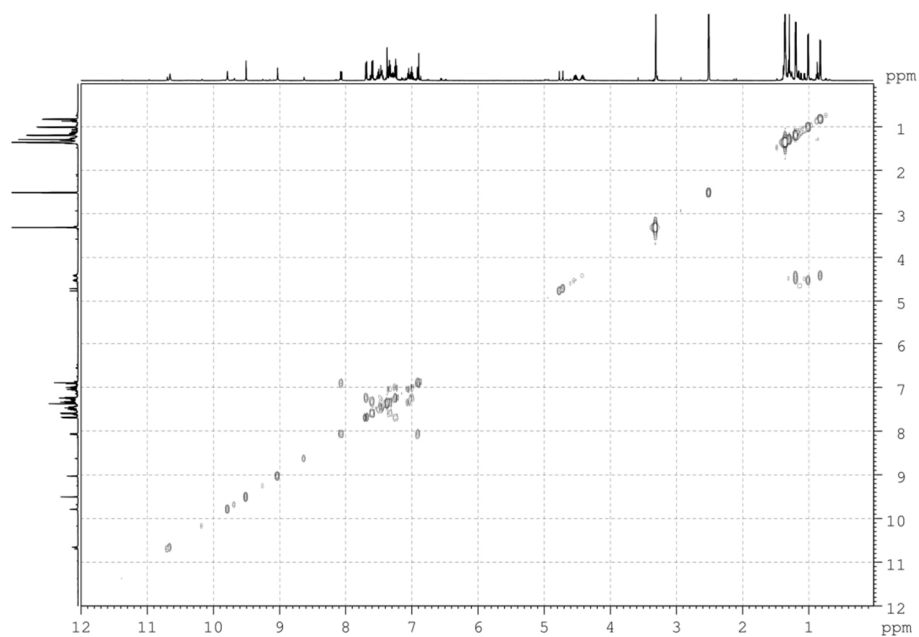

**Figure S75.**  $^1\text{H}$ - $^1\text{H}$  COSY correlations of compound **5c**.

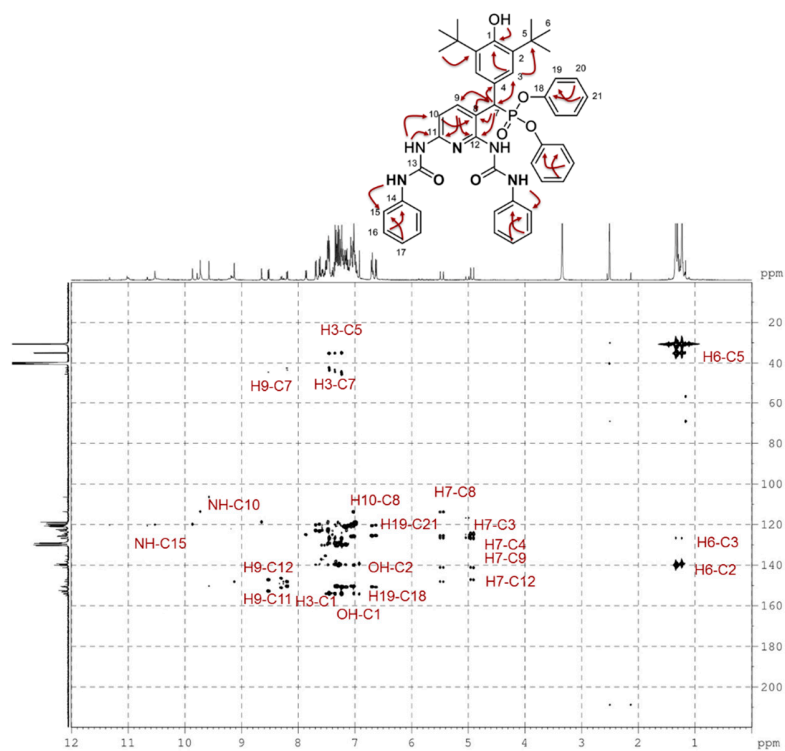

**Figure S76.**  $^1\text{H}$ - $^{13}\text{C}$  HMBC correlations of compound **5d**.

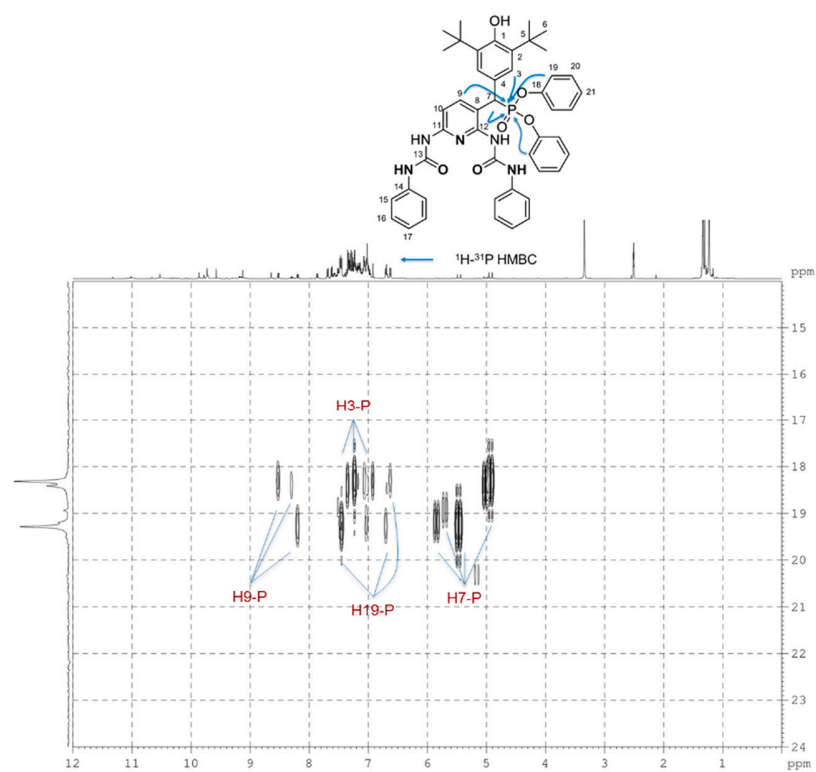

**Figure S77.**  $^1\text{H}$ - $^{31}\text{P}$  HMBC correlations of compound **5d**.

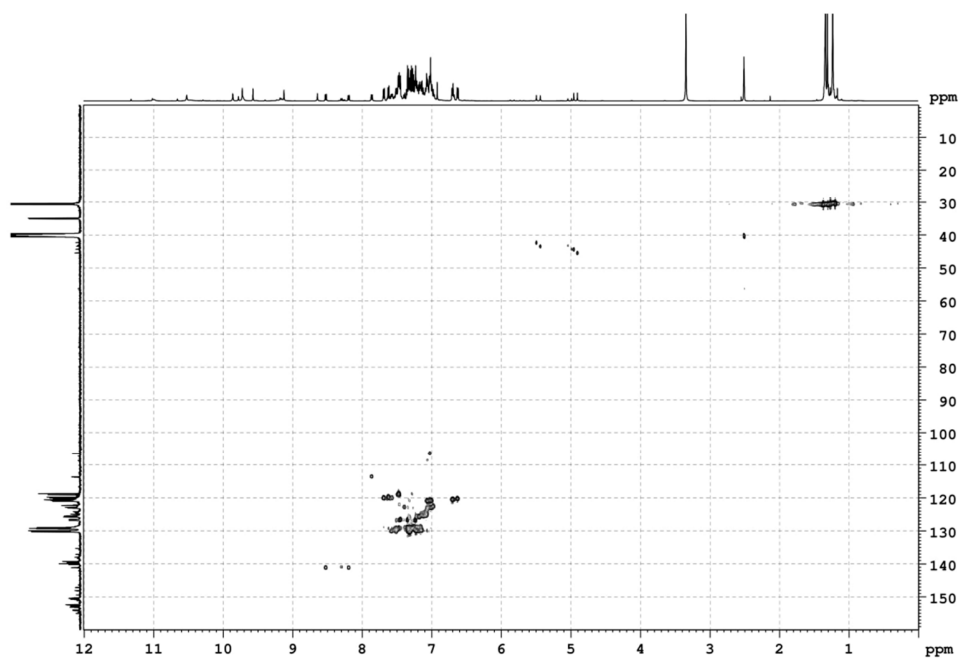

**Figure S78.**  $^1\text{H}$ - $^{13}\text{C}$  HSQC correlations of compound **5d**.



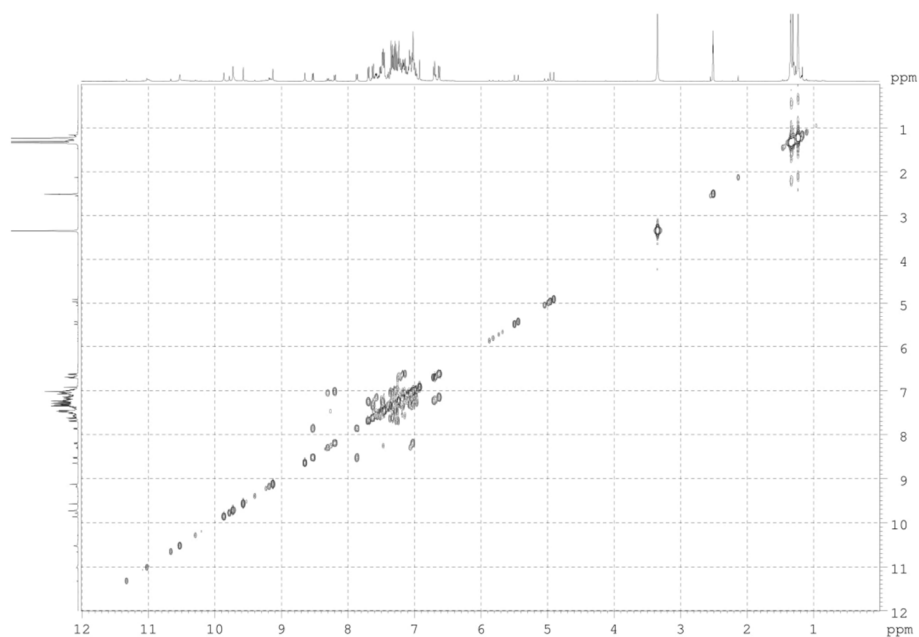

**Figure S79.**  $^1\text{H}$ - $^1\text{H}$  COSY correlations of compound **5d**.

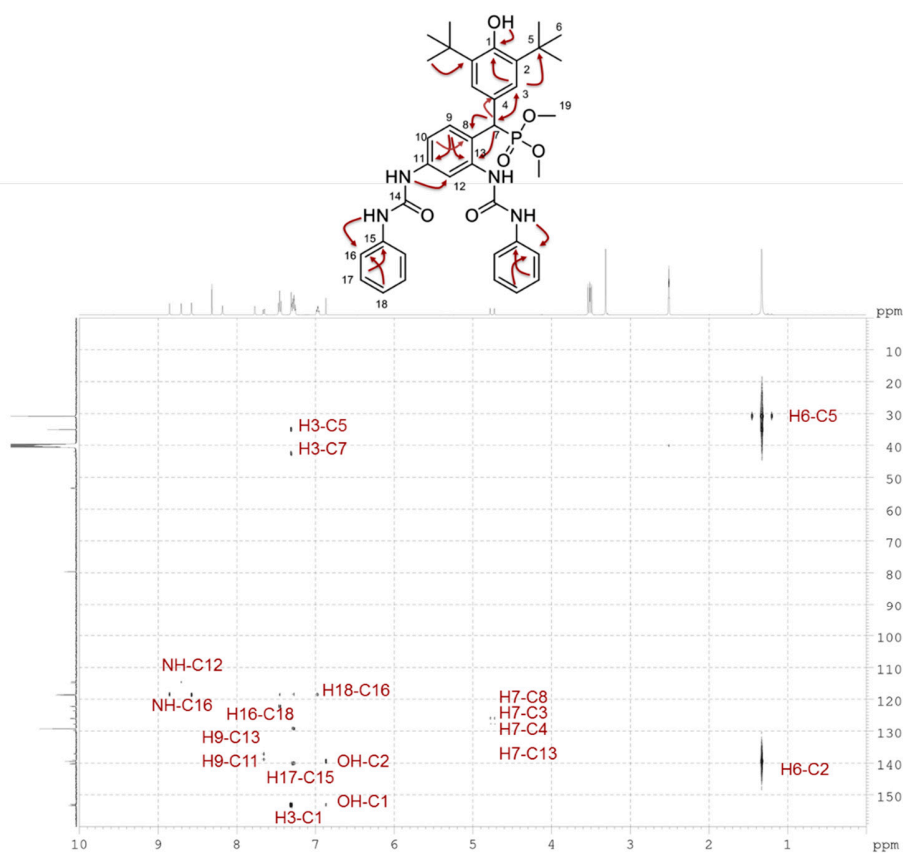

**Figure S80.**  $^1\text{H}$ - $^{13}\text{C}$  HMBC correlations of compound **6a**.

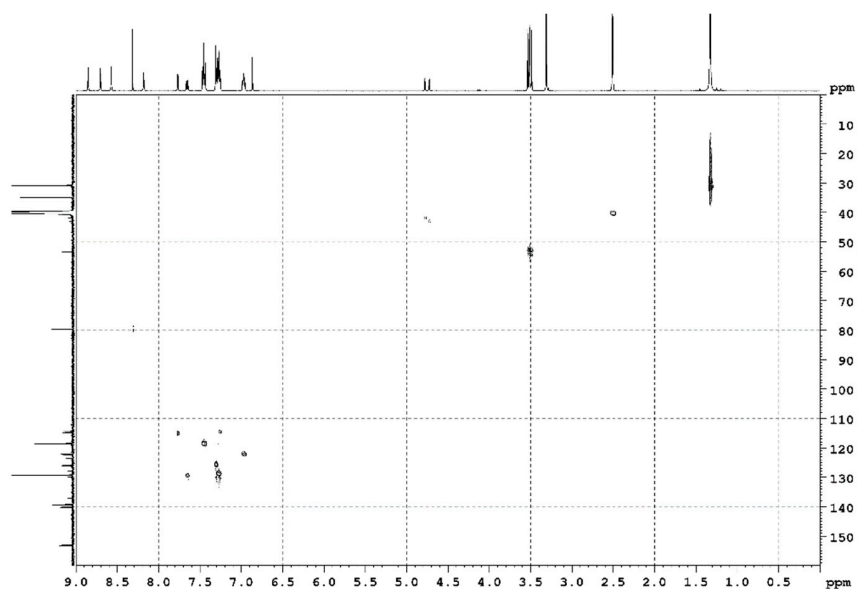

**Figure S81.**  $^1\text{H}$ - $^{13}\text{C}$  HSQC correlations of compound **6a**.

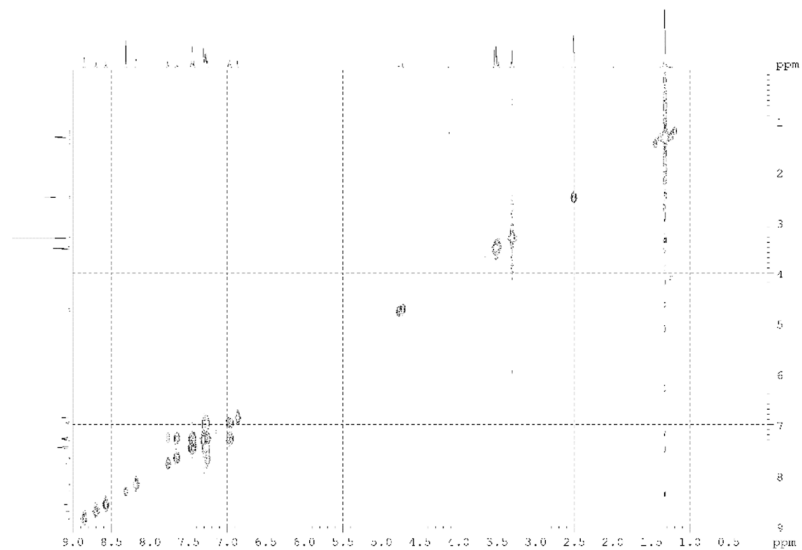

**Figure S82.**  $^1\text{H}$ - $^1\text{H}$  COSY correlations of compound **6a**.

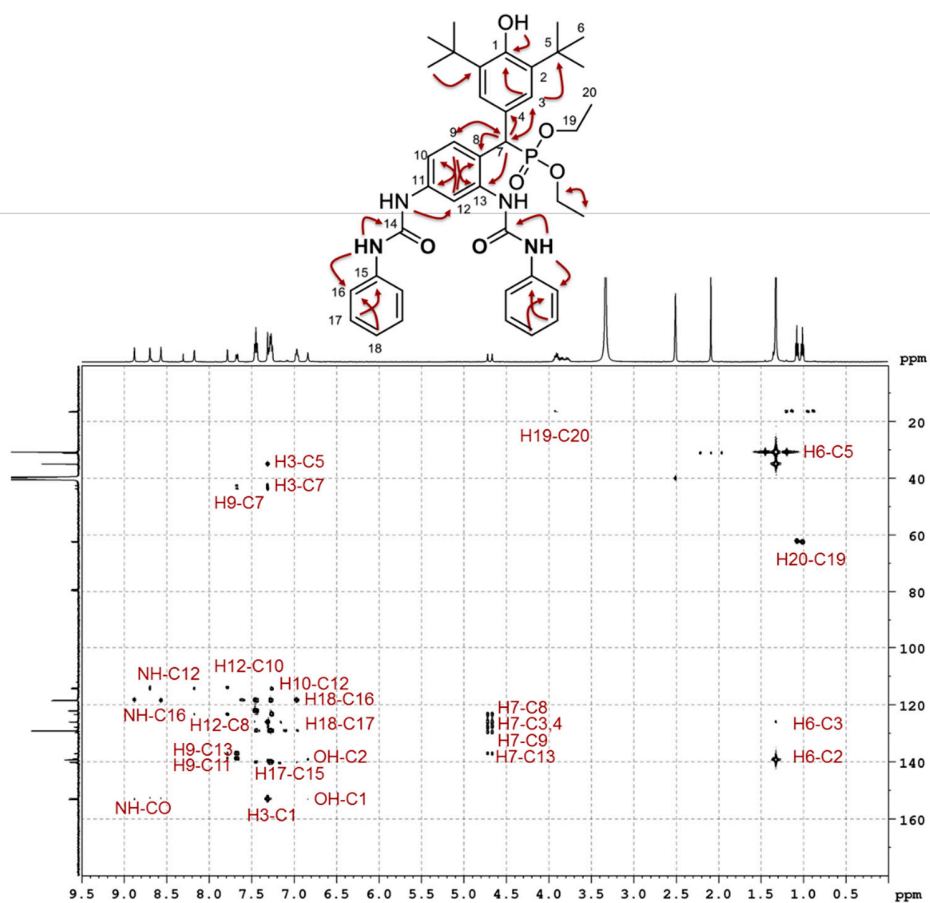

Figure S83.  $^1\text{H}$ - $^{13}\text{C}$  HMBC correlations of compound 6b.

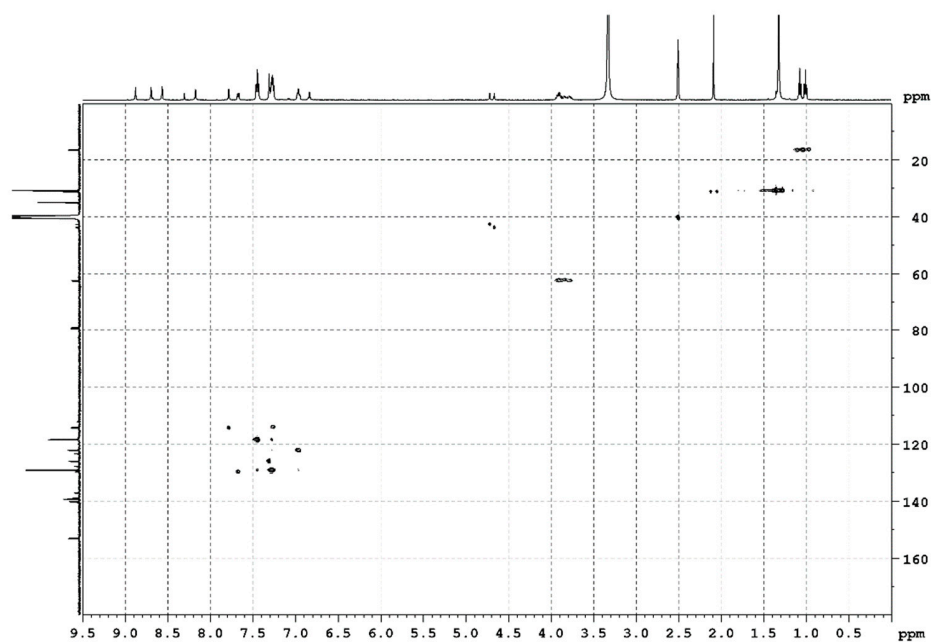

**Figure S84.**  $^1\text{H}$ - $^{13}\text{C}$  HSQC correlations of compound **6b**.

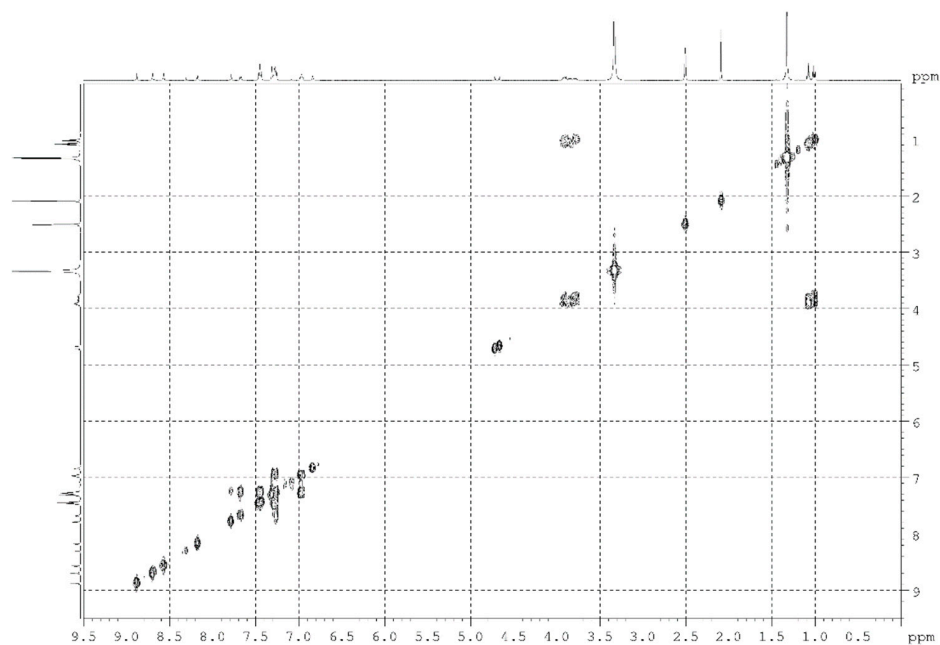

**Figure S85.**  $^1\text{H}$ - $^1\text{H}$  COSY correlations of compound **6b**.

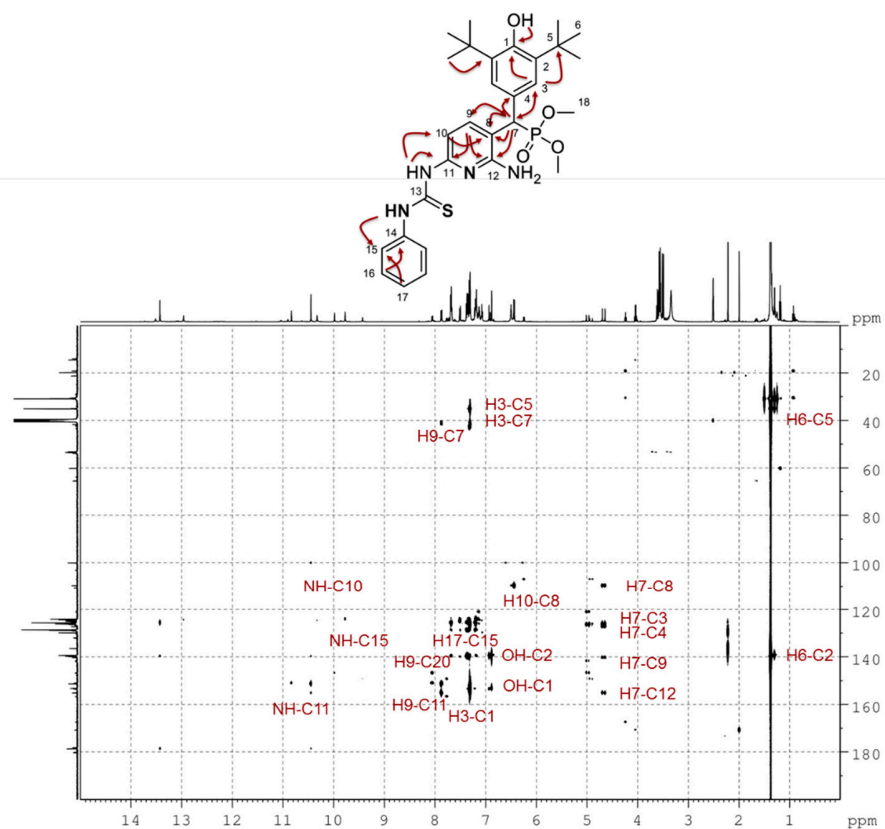

**Figure S86.**  $^1\text{H}$ - $^{13}\text{C}$  HMBC correlations of compound **18a**.

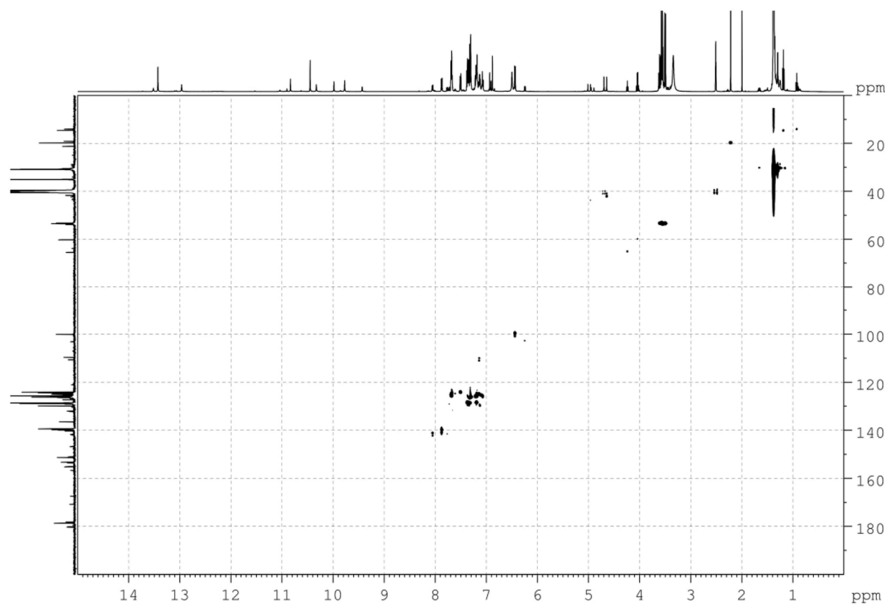

**Figure S87.**  $^1\text{H}$ - $^{13}\text{C}$  HSQC correlations of compound **18a**.

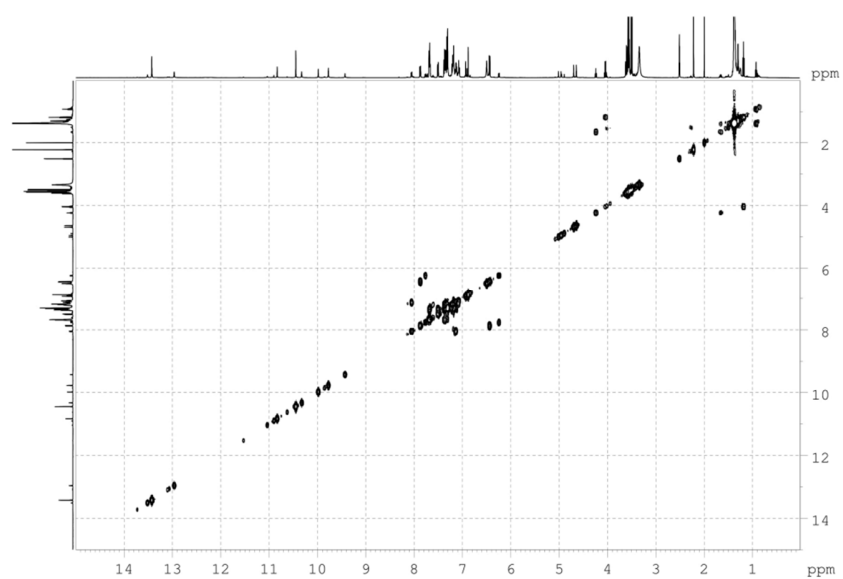

**Figure S88.**  $^1\text{H}$ - $^1\text{H}$  COSY correlations of compound **18a**.

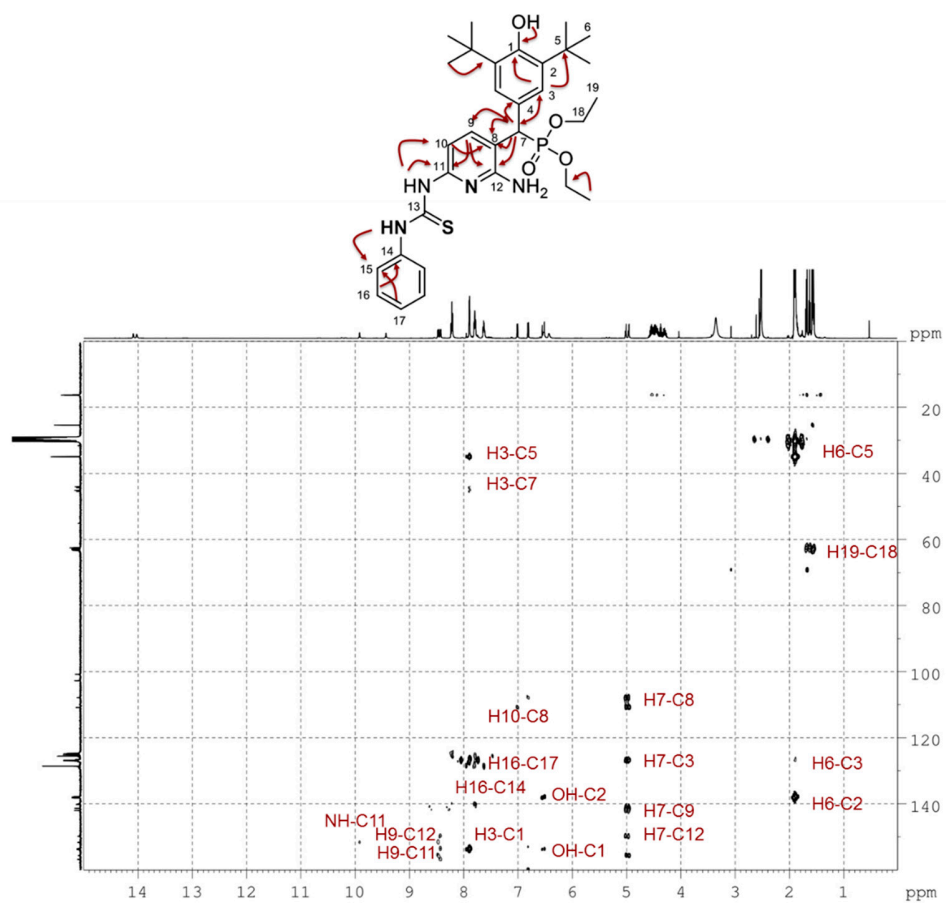

**Figure S89.**  $^1\text{H}$ - $^{13}\text{C}$  HMBC correlations of compound **18b**.

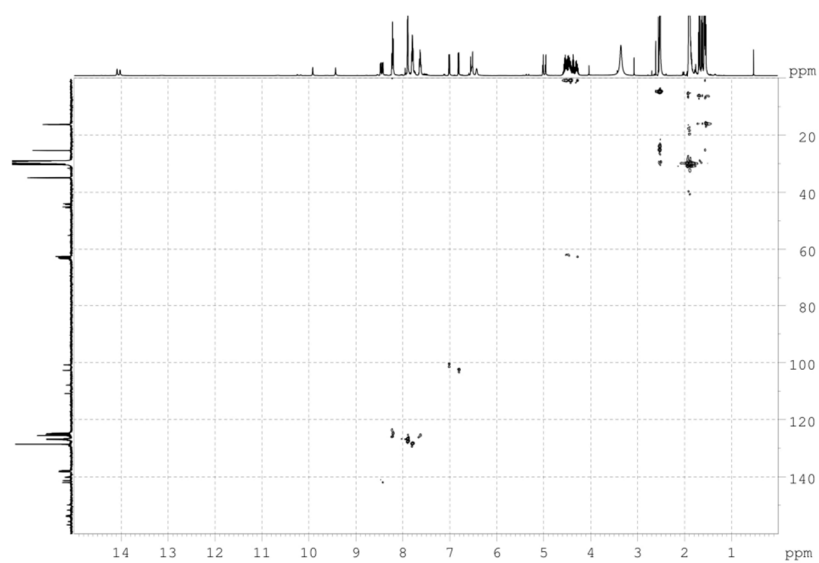

**FigureS90.**  $^1\text{H}$ - $^{13}\text{C}$  HSQC correlations of compound **18b**.

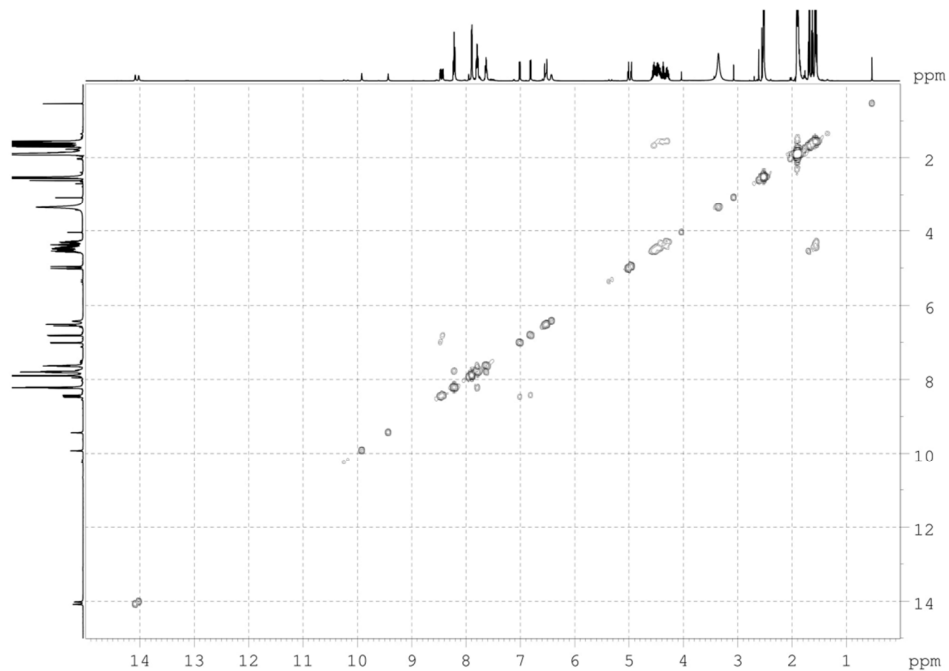

**Figure S91.**  $^1\text{H}$ - $^1\text{H}$  COSY correlations of compound **18b**.

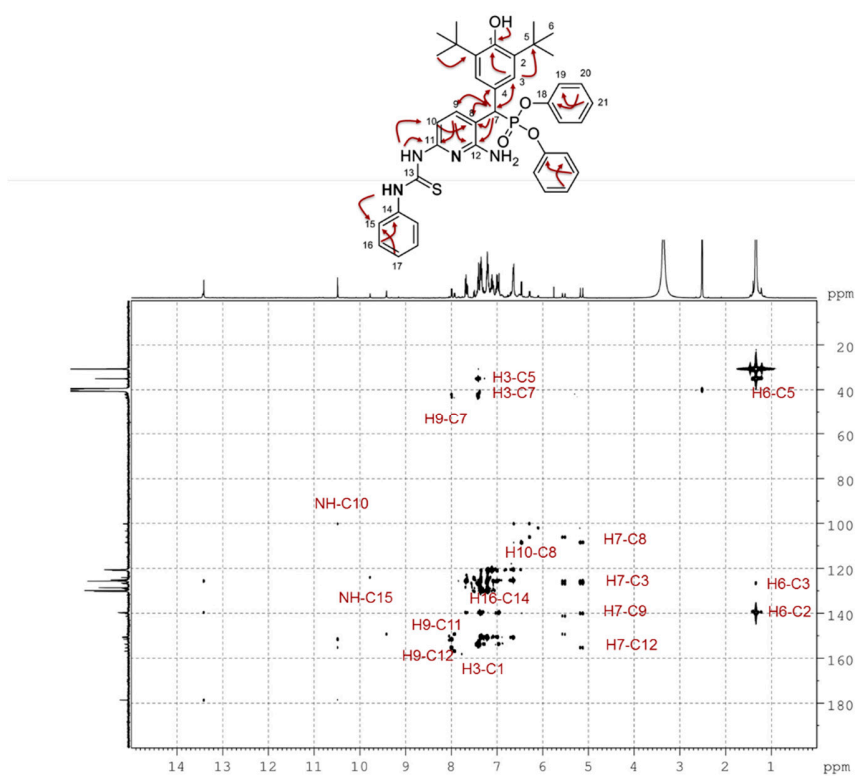

**Figure S92.**  $^1\text{H}$ -  $^{13}\text{C}$  HMBC correlations of compound **18d**.

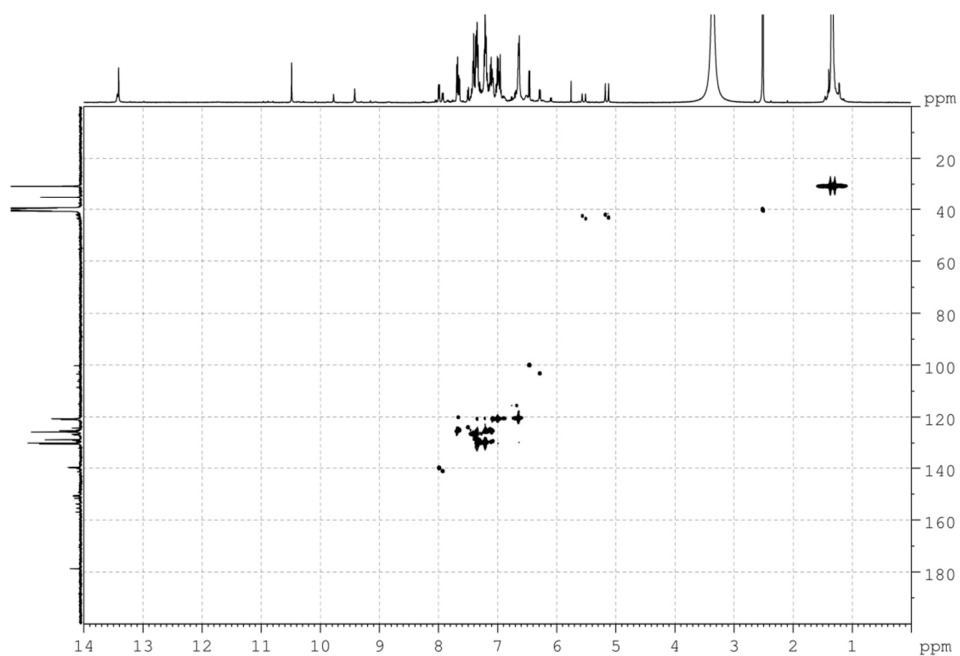

**Figure S93.**  $^1\text{H}$ -  $^{13}\text{C}$  HSQC correlations of compound **18d**.



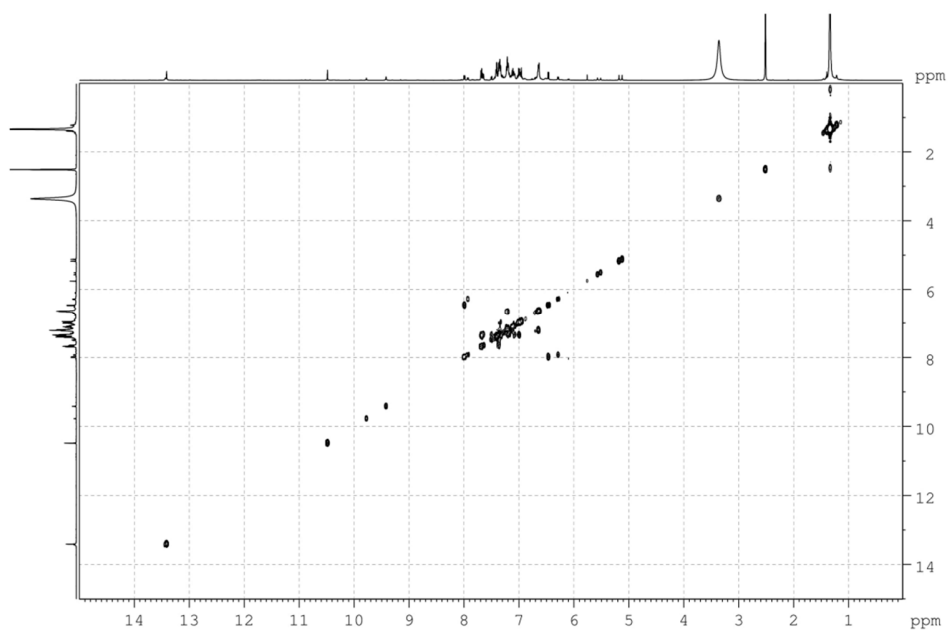

**Figure S94.**  $^1\text{H}$ - $^1\text{H}$  COSY correlations of compound **18d**.

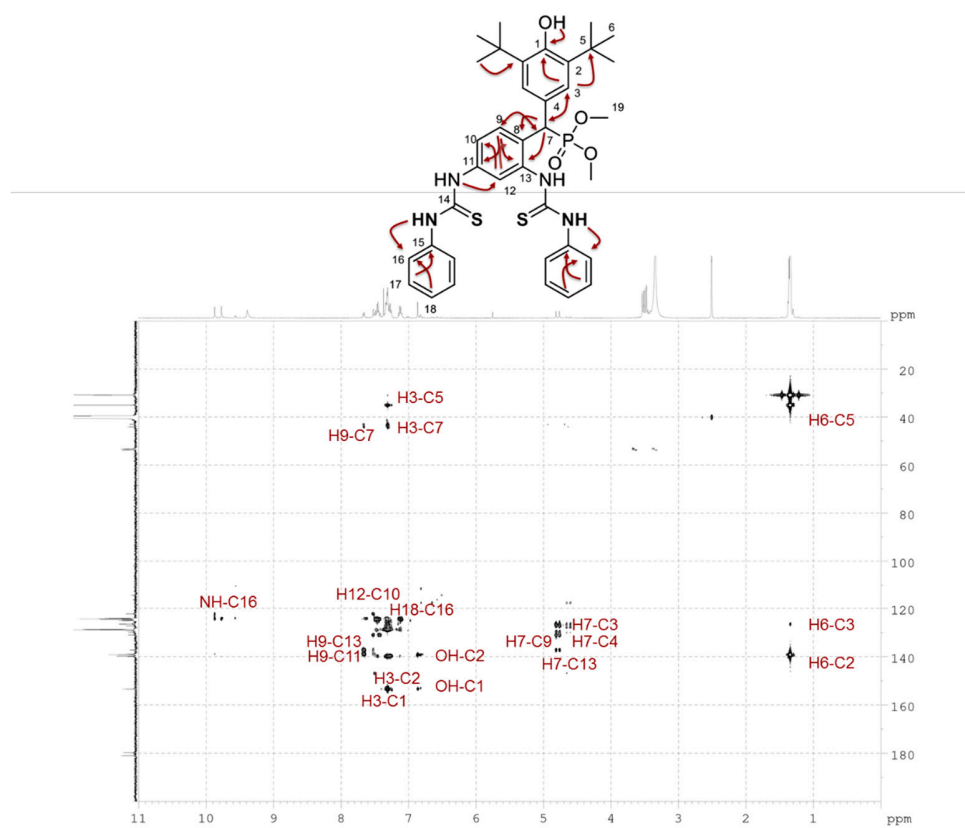

**Figure S95.**  $^1\text{H}$ - $^{13}\text{C}$  HMBC correlations of compound **19a**.

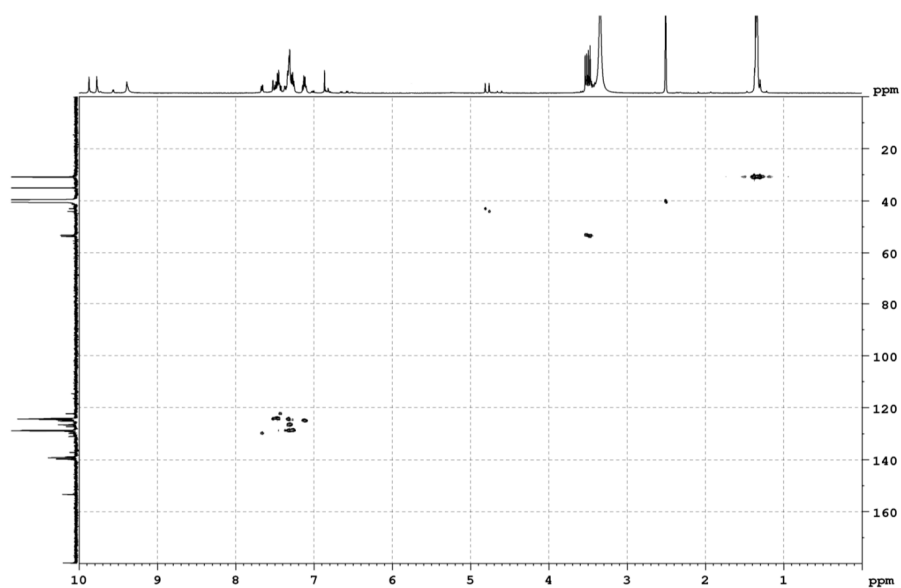

**Figure S96.**  $^1\text{H}$ - $^{13}\text{C}$  HSQC correlations of compound **19a**.

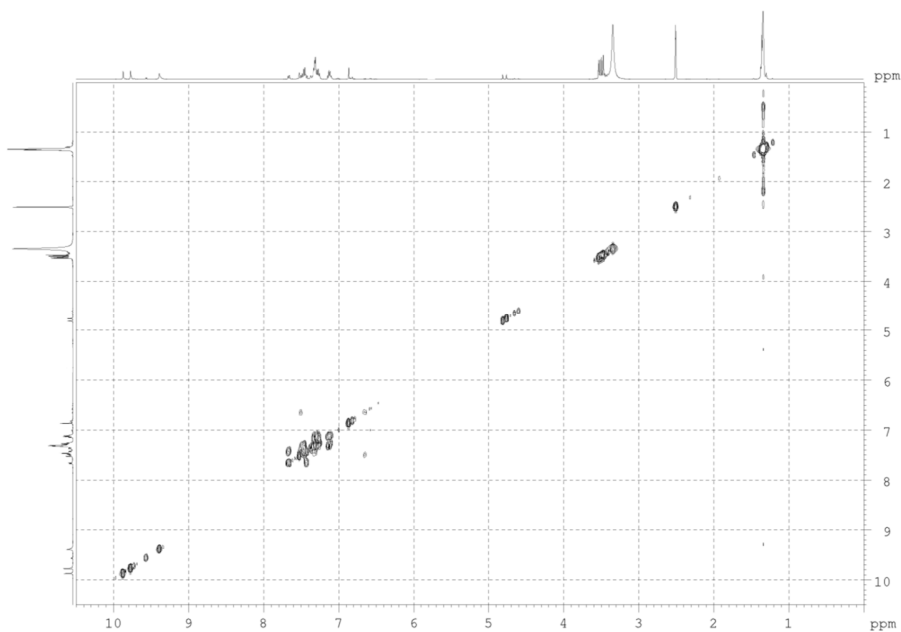

**Figure S97.**  $^1\text{H}$ - $^1\text{H}$  COSY correlations of compound **19a**.

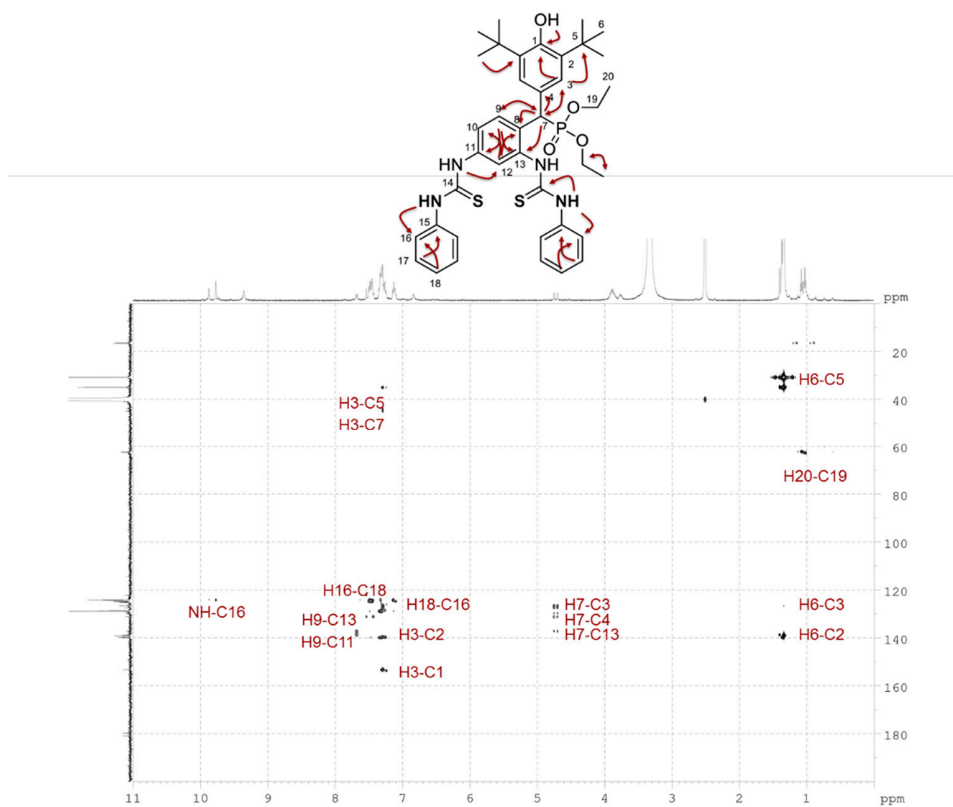

**Figure S98.**  $^1\text{H}$ -  $^{13}\text{C}$  HMBC correlations of compound **19b**.

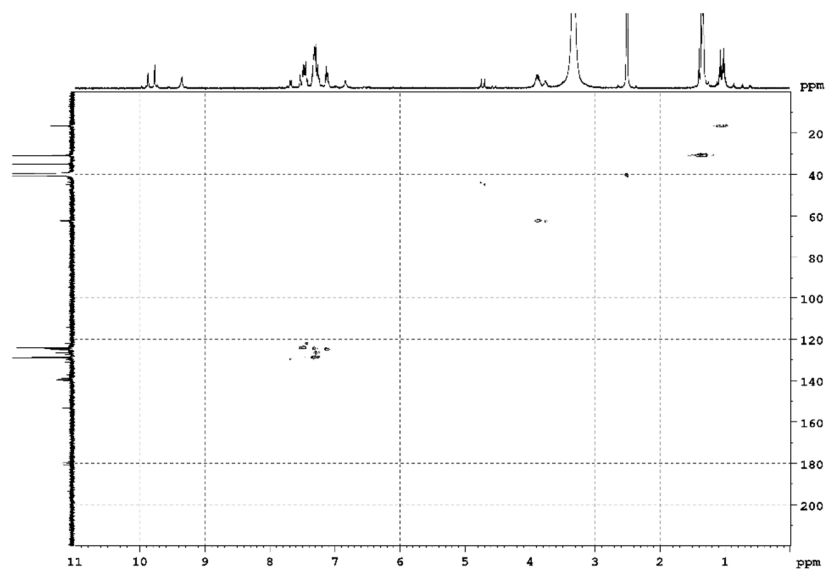

**Figure S99.**  $^1\text{H}$ -  $^{13}\text{C}$  HSQC correlations of compound **19b**.

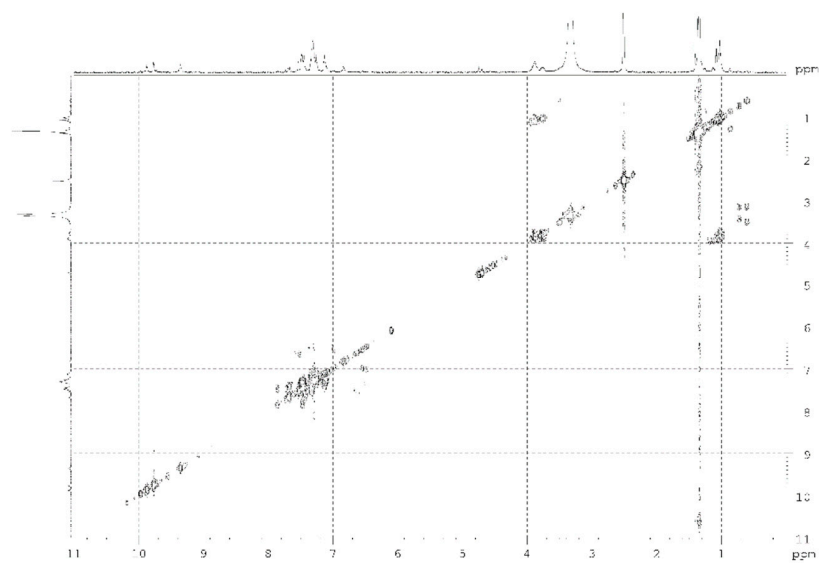

**Figure S100.**  $^1\text{H}$ - $^1\text{H}$  COSY correlations of compound **19b**.

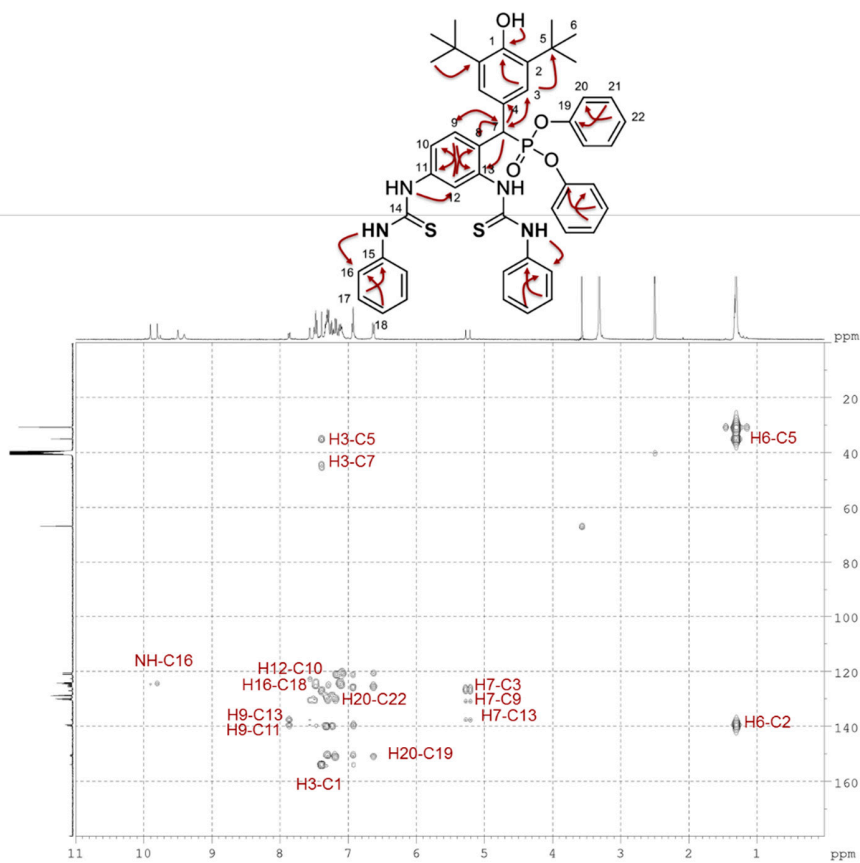

**Figure S101.**  $^1\text{H}$ - $^{13}\text{C}$  HMBC correlations of compound **19d**.

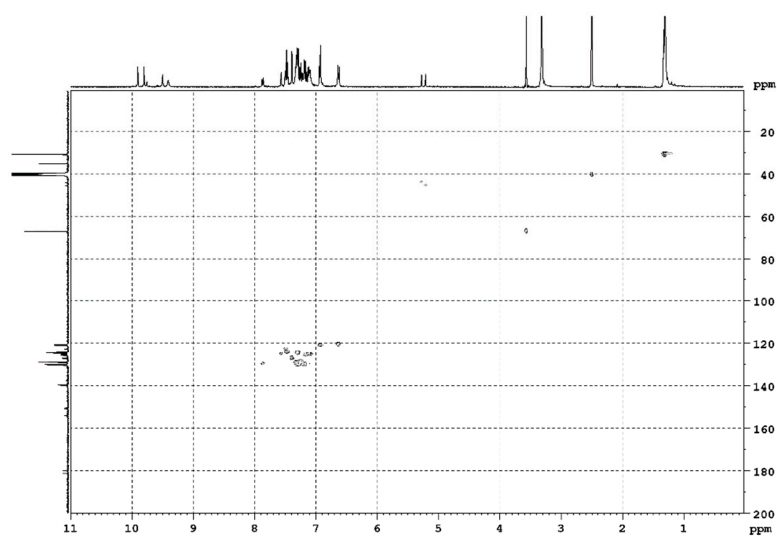

**Figure S102.**  $^1\text{H}$ - $^{13}\text{C}$  HSQC correlations of compound **19d**.

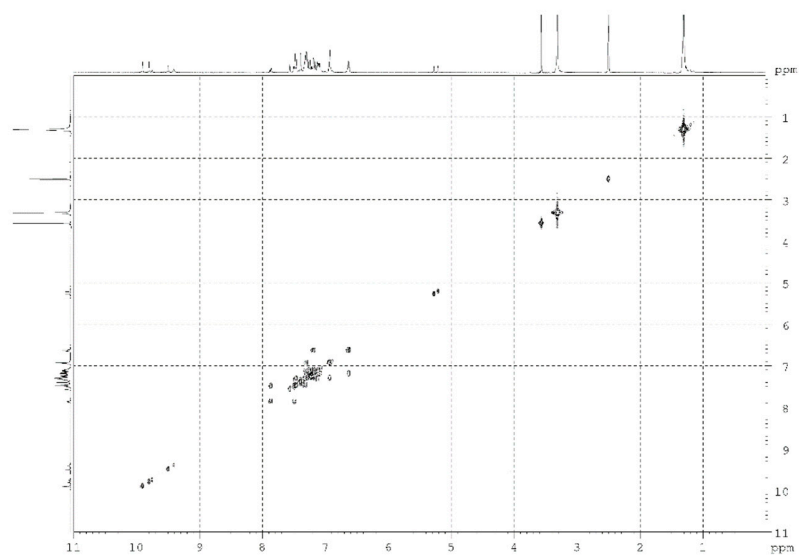

**Figure S103.**  $^1\text{H}$ - $^1\text{H}$  COSY correlations of compound **19d**.

## References

1. Gibadullina, E.; Nguyen, T.T.; Strel'nik, A.; Sapunova, A.; Voloshina, A.; Sudakov, I.; Vyshtakalyuk, A.; Voronina, J.; Pudovik, M.; Burilov, A. New 2,6-Diaminopyridines Containing a Sterically Hindered Benzylphosphonate Moiety in the Aromatic Core as Potential Antioxidant and Anti-Cancer Drugs. *Eur J Med Chem* **2019**, *184*, doi:10.1016/j.ejmech.2019.111735.
2. Gibadullina, E.M.; Shaekhov, T.R.; Badrtdinov, A.K.; Burilov, A.R.  $\alpha$ -Phosphorylated 2,6-Di-Tert-Butyl-4-Methylidene-2,5-Cyclohexadienones in the Reactions with Meta-Phenylenediamine. *Russian Chemical Bulletin* **2014**, *63*, doi:10.1007/s11172-014-0619-2.
3. Sheldrick, G.M. SHELXTL v.6.12, Structure Determination Software Suite, Bruker AXS, Madison, WI, USA, 2000. *Bruker AXS, Madison, WI, USA, 2000* **2000**.
4. Dolomanov, O.V.; B.L.J.; G.R.J.; H.J.A.K.; P.H.J. OLEX2: A Complete Structure Solution, Refinement and Analysis Program. *J Appl Crystallogr* **2009**, *42*, 339–341.
5. Frisch, M.J.; Trucks, G.W.; Schlegel, H.B.; Scuseria, G.E.; Robb, M.A.; Cheeseman, J.R.; Scalmani, G.; Barone, V.; Petersson, G.A.; Nakatsuji, H.; et al. Gaussian 16, Revision C.01: Gaussian Inc., Wallingford, CT. *Gaussian 16* 2016.
6. Zhao, Y.; Truhlar, D.G. Exploring the Limit of Accuracy of the Global Hybrid Meta Density Functional for Main-Group Thermochemistry, Kinetics, and Noncovalent Interactions. *J Chem Theory Comput* **2008**, *4*, doi:10.1021/ct800246v.
7. Zhao, Y.; Truhlar, D.G. Construction of a Generalized Gradient Approximation by Restoring the Density-Gradient Expansion and Enforcing a Tight Lieb-Oxford Bound. *Journal of Chemical Physics* **2008**, *128*, doi:10.1063/1.2912068.
8. Grimme, S.; Ehrlich, S.; Goerigk, L. Effect of the Damping Function in Dispersion Corrected Density Functional Theory. *J Comput Chem* **2011**, *32*, doi:10.1002/jcc.21759.
9. Schwabe, T.; Grimme, S. Double-Hybrid Density Functionals with Long-Range Dispersion Corrections: Higher Accuracy and Extended Applicability. *Physical Chemistry Chemical Physics* **2007**, *9*, doi:10.1039/b704725h.
